# Supplementary material for: Environmentally relevant concentrations of titanium dioxide nanoparticles pose negligible risk to marine microbes
Source: Royal Society of Chemistry journal article supplement (doi:10.1039/d0en00883d), 2021-01-01

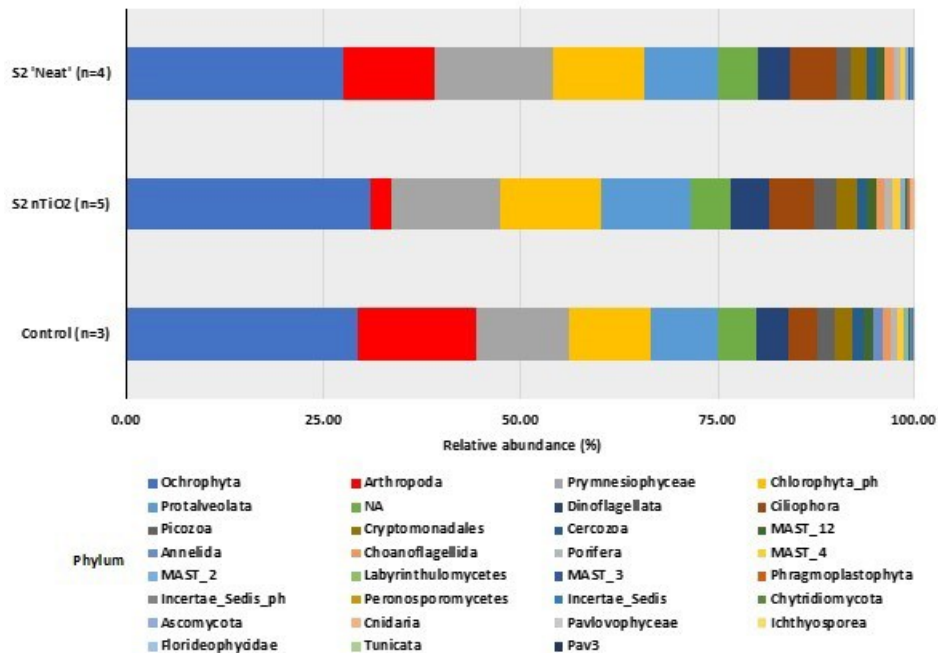

Supplement: d0en00883d9.pdf [file d0en00883d9.pdf]
