# Supplementary material for: Environmentally relevant concentrations of titanium dioxide nanoparticles pose negligible risk to marine microbes
Source: Environ Sci Nano. 2021 Apr 9;8(5):1236–55. doi: 10.1039/d0en00883d (PMC8136324; doi:10.1039/d0en00883d)
Supplement: EN-008-D0EN00883D-s003 [file EN-008-D0EN00883D-s003.xlsx]

## Sheet: Proteins Table
Cell- Proteome
			Relative abundance (%) n=3		Protein LFQ Intensity n=3
Protein IDs	FASTA Annotation	Biological Function	Control	nTiO2	Control	nTiO2	Fold Change (-log2FC)	q-value	Peptides	Razor + unique peptides	Unique peptides	Sequence coverage [%]	Unique + razor sequence coverage [%]	Unique sequence coverage [%]	Mol. weight [kDa]	Q-value	Score	Intensity	MS/MS count	Peptide counts (all)	Peptide counts (razor+unique)	Peptide counts (unique)	Number of proteins	Peptides C1	Peptides C2	Peptides C3	Peptides T1	Peptides T2	Peptides T3	Razor + unique peptides C1	Razor + unique peptides C2	Razor + unique peptides C3	Razor + unique peptides T1	Razor + unique peptides T2	Razor + unique peptides T3	Unique peptides C1	Unique peptides C2	Unique peptides C3	Unique peptides T1	Unique peptides T2	Unique peptides T3	Sequence length	Sequence lengths	Fraction average	Fraction 1	Identification type C1	Identification type C2	Identification type C3	Identification type T1
A8WI29	Uncharacterized protein	Uncharacterized	0.0106906	0.0128002	24.2958	24.5831	-0.287336	0.312538	N	N	N	N	N	N	N	N	N	N	N	N	N	N	N	N	N	N	N	N	N	N	N	N	N	N	N	N	N	N	N	N	N	N	N	N	N	N	N	N	N
A8WI54	Type III restriction system endonuclease	Basic Cellular Processes	0.0160079	0.0154289	26.4088	26.384	0.0248528	0.756506
A8WI63	Uncharacterized protein	Uncharacterized	1.24167	1.54046	29.7546	30.0935	-0.338921	0.242	3	3	3	24.4	24.4	24.4	20.147	0	10.267	253300000	13	3	3	3	1	3	3	2	3	2	3	3	3	2	3	2	3	3	3	2	3	2	3	172	172	1	18	NaN	NaN	NaN	NaN
A8WI64	Uncharacterized protein	Uncharacterized	0.0703319	0.0548957	25.6492	25.3179	0.331297	0.37922	28	28	28	50	50	50	57.072	0	184.68	6062700000	200	28	28	28	1	26	25	27	28	25	24	26	25	27	28	25	24	26	25	27	28	25	24	496	496	1	231	NaN	NaN	NaN	NaN
A8WI78	Uncharacterized protein	Uncharacterized	0.485242	0.452988	28.41	28.3378	0.0722872	0.919382	6	6	6	49.2	49.2	49.2	7.6045	0	120.31	22754000000	86	6	6	6	1	6	6	6	6	5	6	6	6	6	6	5	6	6	6	6	6	5	6	65	65	1	110	NaN	NaN	NaN	NaN
A8WI96	Uncharacterized protein	Uncharacterized	0.148687	0.151191	26.0848	26.1454	-0.0606448	0.892232	3	3	3	46.3	46.3	46.3	7.7887	0	4.0945	575760000	15	3	3	3	1	3	3	3	3	3	3	3	3	3	3	3	3	3	3	3	3	3	3	67	67	1	24	NaN	NaN	NaN	NaN
A8WID4	Uncharacterized protein	Uncharacterized	0.0378246	0.038655	24.5529	24.6096	-0.056729	0.819123	3	3	3	50	50	50	7.3628	0	31.04	5812400000	36	3	3	3	1	2	3	2	1	2	2	2	3	2	1	2	2	2	3	2	1	2	2	66	66	1	35	NaN	NaN	NaN	NaN
A8WIE3	Uncharacterized protein	Uncharacterized	0.106894	0.151411	26.1803	26.9043	-0.723991	0.603372	2	2	2	44.2	44.2	44.2	4.8428	0	6.765	722700000	12	2	2	2	1	2	2	2	2	2	2	2	2	2	2	2	2	2	2	2	2	2	2	43	43	1	18	NaN	NaN	NaN	NaN
A8WIG1	Uncharacterized protein	Uncharacterized	0.00810819	0.011023	23.1826	23.599	-0.416372	0.845664	6	6	6	69	69	69	6.8548	0	58.771	730820000	34	6	6	6	1	6	6	5	5	5	5	6	6	5	5	5	5	6	6	5	5	5	5	58	58	1	64	NaN	NaN	NaN	NaN
A8WIN4	Uncharacterized protein	Uncharacterized	0.0169626	0.0168982	25.0939	25.1234	-0.0295035	0.927279	3	3	3	20.5	20.5	20.5	8.4465	0	11.939	862570000	11	3	3	3	1	2	3	3	3	3	3	2	3	3	3	3	3	2	3	3	3	3	3	73	73	1	17	NaN	NaN	NaN	NaN
O07295	Divinyl chlorophyll a/b light-harvesting protein PcbA	Photosynthesis	0.626221	0.519645	31.1988	30.9603	0.238486	0.356722	4	4	4	26.5	26.5	26.5	13.205	0	19.573	159700000	16	4	4	4	1	3	2	2	4	3	1	3	2	2	4	3	1	3	2	2	4	3	1	117	117	1	20	NaN	NaN	NaN	NaN
P0A3A2	Chromosomal replication initiator protein DnaA	Basic Cellular Processes	0.0191689	0.0177683	26.5669	26.4881	0.0787932	0.608	7	7	7	34.4	34.4	34.4	22.387	0	23.162	583670000	23	7	7	7	1	4	4	6	6	5	7	4	4	6	6	5	7	4	4	6	6	5	7	189	189	1	39	NaN	NaN	NaN	NaN
P59830	Probable aspartoacylase	Central Metabolism	0.010867	0.0103508	25.0975	25.0579	0.0395953	0.858281	10	10	10	26.4	26.4	26.4	38.66	0	225.96	51907000000	454	10	10	10	1	10	10	10	10	10	10	10	10	10	10	10	10	10	10	10	10	10	10	352	352	1	490	NaN	NaN	NaN	NaN
P59882	tRNA pseudouridine synthase B	Basic Cellular Processes	0.00521915	0.00584553	24.0847	24.2791	-0.194412	0.516443	32	32	32	74.9	74.9	74.9	51.989	0	298.75	5400500000	153	32	32	32	1	22	27	25	25	23	25	22	27	25	25	23	25	22	27	25	25	23	25	463	463	1	191	NaN	NaN	NaN	NaN
P59920	UPF0284 protein PMM0439	Central Metabolism	0.0193604	0.0181448	26.3129	26.2485	0.0643845	0.833713	9	9	9	41.4	41.4	41.4	34.033	0	46.764	958920000	59	9	9	9	1	8	9	8	8	9	8	8	9	8	8	9	8	8	9	8	8	9	8	295	295	1	56	NaN	NaN	NaN	NaN
Q7TTQ1	tRNA-specific 2-thiouridylase MnmA	Basic Cellular Processes	0.00367442	0.00308525	23.9255	23.6564	0.269136	0.770162	12	12	12	34.4	34.4	34.4	34.324	0	28.573	340440000	32	12	12	12	1	6	9	9	9	7	9	6	9	9	9	7	9	6	9	9	9	7	9	305	305	1	51	NaN	NaN	NaN	NaN
Q7TTQ2	Possible NADH-Ubiquinone/plastoquinone (comple)	Central Metabolism	0.00999509	0.0108075	24.1736	24.2775	-0.103923	0.964783	4	4	4	11.2	11.2	11.2	41.786	0	5.1409	631590000	13	4	4	4	1	3	2	4	2	4	4	3	2	4	2	4	4	3	2	4	2	4	4	385	385	1	22	NaN	NaN	NaN	NaN
Q7TU15	Threonine synthase	Central Metabolism	0.124774	0.121942	28.934	28.932	0.00206375	0.997658	4	4	4	12.6	12.6	12.6	44.198	0	12.84	155110000	21	4	4	4	1	2	2	2	2	3	3	2	2	2	2	3	3	2	2	2	2	3	3	390	390	1	16	NaN	NaN	NaN	NaN
Q7TU16	DNA repair protein RecN	Basic Cellular Processes	0.00266666	0.00274406	23.9792	24.0635	-0.0842527	0.890134	5	5	5	28.9	28.9	28.9	20.639	0.00078064	3.418	385010000	10	5	5	5	1	4	2	4	2	4	4	4	2	4	2	4	4	4	2	4	2	4	4	180	180	1	20	NaN	NaN	NaN	NaN
Q7TU17	Polyphosphate kinase	Inorganic Nutrient Processing	0.0128792	0.0129393	26.5822	26.6168	-0.0345904	0.510526	27	27	27	68.7	68.7	68.7	40.088	0	310.05	19545000000	336	27	27	27	1	26	26	24	25	25	24	26	26	24	25	25	24	26	26	24	25	25	24	367	367	1	314	NaN	NaN	NaN	NaN
Q7TU18	Aminomethyltransferase	Central Metabolism	0.0476328	0.044171	27.5587	27.4783	0.0803452	0.352712	10	10	10	23.8	23.8	23.8	63.841	0	23.275	359330000	25	10	10	10	1	7	8	5	5	5	7	7	8	5	5	5	7	7	8	5	5	5	7	559	559	1	41	NaN	NaN	NaN	NaN
Q7TU19	tRNA uridine 5-carboxymethylaminomethyl modification enzyme MnmG	Basic Cellular Processes	0.00410298	0.0040261	24.8424	24.8444	-0.00203514	1	34	34	34	43.7	43.7	43.7	81.043	0	263.57	5019400000	204	34	34	34	1	31	30	33	33	28	30	31	30	33	33	28	30	31	30	33	33	28	30	695	695	1	242	NaN	NaN	NaN	NaN
Q7TU20	Glycine cleavage system H protein	Central Metabolism	0.034015	0.0359469	25.5402	25.6569	-0.11662	0.806296	17	17	17	50	50	50	41.903	0	101.81	4939900000	104	17	17	17	1	16	17	16	16	16	16	16	17	16	16	16	16	16	17	16	16	16	16	370	370	1	132	NaN	NaN	NaN	NaN
Q7TU21	Aspartate-semialdehyde dehydrogenase	Central Metabolism	0.0467547	0.0447665	27.4186	27.3881	0.0304521	0.913794	13	13	13	23.2	23.2	23.2	73.259	0	49.236	800740000	61	13	13	13	1	9	12	12	9	9	7	9	12	12	9	9	7	9	12	12	9	9	7	654	654	1	71	NaN	NaN	NaN	NaN
Q7TU22	Putative Precorrin-8X methylmutase CobH	Central Metabolism	0.00688	0.00714238	23.8705	23.9624	-0.0919501	0.951656	5	5	5	42.6	42.6	42.6	14.508	0	69.023	677590000	45	5	5	5	1	4	5	4	5	5	5	4	5	4	5	5	5	4	5	4	5	5	5	129	129	1	39	NaN	NaN	NaN	NaN
Q7TU24	Translation initiation factor IF-3	Basic Cellular Processes	0.163151	0.173929	28.3737	28.4924	-0.118638	0.475912	20	20	20	60.1	60.1	60.1	37.945	0	293.95	7164500000	150	20	20	20	1	18	17	17	18	16	19	18	17	17	18	16	19	18	17	17	18	16	19	343	343	1	157	NaN	NaN	NaN	NaN
Q7TU26	Possible Conserved carboxylase domain	Carbon Fixation	0.0130036	0.0141886	24.8264	24.9803	-0.153909	0.294597	5	5	5	31.4	31.4	31.4	22.569	0	14.913	292260000	13	5	5	5	1	5	5	5	3	5	5	5	5	5	3	5	5	5	5	5	3	5	5	207	207	1	32	NaN	NaN	NaN	NaN
Q7TU27	30S ribosomal protein S19	Basic Cellular Processes	0.133424	0.130537	27.0152	27.0179	-0.00274531	1	16	16	16	58.4	58.4	58.4	22.325	0	172.51	6825800000	122	16	16	16	1	14	14	16	14	14	15	14	14	16	14	14	15	14	14	16	14	14	15	190	190	1	149	NaN	NaN	NaN	NaN
Q7TU28	30S ribosomal protein S17	Basic Cellular Processes	0.0937353	0.0881134	26.4619	26.4023	0.05959	0.743643	10	10	10	52.5	52.5	52.5	22.74	0	60.224	831180000	48	10	10	10	1	9	8	9	7	7	8	9	8	9	7	7	8	9	8	9	7	7	8	204	204	1	62	NaN	NaN	NaN	NaN
Q7TU29	50S ribosomal protein L14	Basic Cellular Processes	0.154193	0.170298	27.6412	27.8131	-0.171967	0.149538	4	4	4	37.4	37.4	37.4	10.192	0	14.375	2221700000	39	4	4	4	1	4	4	4	4	4	4	4	4	4	4	4	4	4	4	4	4	4	4	91	91	1	42	NaN	NaN	NaN	NaN
Q7TU35	Prephenate dehydratase	Central Metabolism	0.0162079	0.014796	25.6066	25.5025	0.104113	0.44701	9	9	9	59.1	59.1	59.1	10.164	0	26.406	1915400000	65	9	9	9	1	8	9	9	9	9	9	8	9	9	9	9	9	8	9	9	9	9	9	88	88	1	69	NaN	NaN	NaN	NaN
Q7TU36	S1 RNA binding domain:Ribonuclease E and G	Basic Cellular Processes	0.0389696	0.0361052	27.9763	27.8961	0.0801913	0.594016	11	11	11	68.6	68.6	68.6	13.413	0	78.551	5690800000	105	11	11	11	1	10	10	10	10	10	11	10	10	10	10	10	11	10	10	10	10	10	11	121	121	1	130	NaN	NaN	NaN	NaN
Q7TU37	Serine protease	Central Metabolism	0.00596966	0.00607326	24.5995	24.6521	-0.0525443	0.842619	8	8	8	49.1	49.1	49.1	30.767	0	25.798	1311100000	52	8	8	8	1	7	7	6	7	5	7	7	7	6	7	5	7	7	7	6	7	5	7	281	281	1	51	NaN	NaN	NaN	NaN
Q7TU38	30S ribosomal protein S20	Basic Cellular Processes	0.0507854	0.0556168	25.7027	25.8692	-0.166486	0.760137	31	31	31	56.7	56.7	56.7	68.412	0	323.31	11499000000	236	31	31	31	1	23	28	27	26	30	27	23	28	27	26	30	27	23	28	27	26	30	27	605	605	1	244	NaN	NaN	NaN	NaN
Q7TU39	ATP-dependent dethiobiotin synthetase BioD	Central Metabolism	0.0282384	0.0251553	26.0519	25.9144	0.137544	0.533761	11	11	11	37.4	37.4	37.4	41.197	0	60.865	628940000	42	11	11	11	1	6	10	7	10	10	8	6	10	7	10	10	8	6	10	7	10	10	8	380	380	1	54	NaN	NaN	NaN	NaN
Q7TU40	Adenylosuccinate lyase	Central Metabolism	0.0452681	0.0415267	27.7056	27.6097	0.0959854	0.23498	3	3	3	36.1	36.1	36.1	11.004	0	14.772	827220000	29	3	3	3	1	3	3	3	3	3	2	3	3	3	3	3	2	3	3	3	3	3	2	97	97	1	23	NaN	NaN	NaN	NaN
Q7TU41	FtsJ cell division protein:S4 domain:Hemolysin A	Basic Cellular Processes	0.00947857	0.00661405	24.7739	24.006	0.767877	0.651301	9	9	9	54.1	54.1	54.1	24.829	0	59.813	1133000000	51	9	9	9	1	8	8	9	8	8	8	8	8	9	8	8	8	8	8	9	8	8	8	220	220	1	50	NaN	NaN	NaN	NaN
Q7TU42	ATP synthase epsilon chain	Membrane Transport	0.0194603	0.0269755	24.8002	25.2698	-0.46955	0.392403	26	26	26	62.9	62.9	62.9	48.974	0	236.41	9697200000	275	26	26	26	1	25	24	24	24	25	26	25	24	24	24	25	26	25	24	24	24	25	26	431	431	1	269	NaN	NaN	NaN	NaN
Q7TU43	10 kDa chaperonin	Basic Cellular Processes	1.16445	1.18166	30.308	30.3736	-0.0655543	0.918995	4	4	4	15.6	15.6	15.6	30.138	0.0067064	2.0314	284130000	5	4	4	4	1	2	1	2	3	1	2	2	1	2	3	1	2	2	1	2	3	1	2	270	270	1	16	NaN	NaN	NaN	NaN
Q7TU44	60 kDa chaperonin 2	Basic Cellular Processes	5.52056	5.57012	34.9723	35.0133	-0.04105	0.575731	3	3	3	19.4	19.4	19.4	14.373	0	26.309	498400000	18	3	3	3	1	3	2	3	3	3	3	3	2	3	3	3	3	3	2	3	3	3	3	134	134	1	27	NaN	NaN	NaN	NaN
Q7TU49	Possible Rubredoxin	Energy Production and Conversion	0.074176	0.0690438	26.3921	26.3192	0.0729287	0.769425	10	10	10	95.1	95.1	95.1	10.789	0	119.49	38129000000	170	10	10	10	1	10	10	10	9	10	10	10	10	10	9	10	10	10	10	10	9	10	10	103	103	1	178	NaN	NaN	NaN	NaN
Q7TU50	Possible Hemagglutinin-neuraminidase	Other	0.00726418	0.00547491	23.6645	23.3605	0.304045	0.703123	84	84	83	96.7	96.7	96.7	57.44	0	323.31	1556600000000	3829	84	84	83	1	80	78	81	82	83	81	80	78	81	82	83	81	79	77	80	81	82	80	544	544	1	3543	NaN	NaN	NaN	NaN
Q7TU51	Possible Carbon storage regulator	Energy Production and Conversion	0.00666059	0.00679795	23.4829	23.5509	-0.0680599	0.930458	8	8	8	89.6	89.6	89.6	12.014	0	85.37	1765600000	78	8	8	8	1	8	6	7	8	6	8	8	6	7	8	6	8	8	6	7	8	6	8	106	106	1	78	NaN	NaN	NaN	NaN
Q7TU52	Possible Heat-labile enterotoxin alpha chain	Other	0.00911794	0.00978159	23.2418	23.37	-0.128222	0.4047	3	3	3	20.3	20.3	20.3	19.851	0	6.6477	166050000	14	3	3	3	1	3	2	2	2	2	2	3	2	2	2	2	2	3	2	2	2	2	2	172	172	1	14	NaN	NaN	NaN	NaN
Q7TU53	Possible Helix-turn-helix protein, copG family	Basic Cellular Processes	0.0543374	0.0681307	25.4266	25.7766	-0.350017	0.234792	3	3	3	25.2	25.2	25.2	18.842	0	19.245	147550000	14	3	3	3	1	2	2	2	2	2	2	2	2	2	2	2	2	2	2	2	2	2	2	159	159	1	21	NaN	NaN	NaN	NaN
Q7TU56	Ribosomal protein L11 methyltransferase	Basic Cellular Processes	0.00548577	0.00564364	24.1383	24.1989	-0.0605971	0.856409	3	3	3	24.7	24.7	24.7	11.084	0	5.6368	159400000	13	3	3	3	1	3	3	3	3	3	3	3	3	3	3	3	3	3	3	3	3	3	3	97	97	1	23	NaN	NaN	NaN	NaN
Q7TU58	Possible Beta-lactamase	Other	0.0174362	0.0154008	23.9144	23.7653	0.149054	0.476135	5	5	5	62.2	62.2	62.2	8.7349	0	26.799	780520000	16	5	5	5	1	3	3	3	2	2	2	3	3	3	2	2	2	3	3	3	2	2	2	74	74	1	22	NaN	NaN	NaN	NaN
Q7TU60	3-methyl-2-oxobutanoate hydroxymethyltransferase	Central Metabolism	0.017858	0.0191502	25.6176	25.7459	-0.128258	0.286844	5	5	5	26.7	26.7	26.7	34.307	0	48.748	428600000	35	5	5	5	1	4	5	5	4	5	4	4	5	5	4	5	4	4	5	5	4	5	4	300	300	1	27	NaN	NaN	NaN	NaN
Q7TU61	Cell division protein FtsZ	Basic Cellular Processes	0.573959	0.573403	31.1544	31.1807	-0.0262553	0.761098	5	5	5	58	58	58	9.2189	0	11.945	225280000	18	5	5	5	1	3	4	4	4	5	4	3	4	4	4	5	4	3	4	4	4	5	4	81	81	1	30	NaN	NaN	NaN	NaN
Q7TU63	tRNA/rRNA methyltransferase (SpoU)	Basic Cellular Processes	0.0318764	0.0302416	26.3829	26.3414	0.0414403	0.915546	8	8	8	42.8	42.8	42.8	28.262	0	79.533	1589200000	51	8	8	8	1	7	5	7	6	6	6	7	5	7	6	6	6	7	5	7	6	6	6	257	257	1	56	NaN	NaN	NaN	NaN
Q7TU64	Indole-3-glycerol phosphate synthase	Central Metabolism	0.0201216	0.0199662	25.9877	26.0047	-0.0170835	0.946087	29	29	29	78.2	78.2	78.2	39.151	0	323.31	169310000000	739	29	29	29	1	27	27	28	29	29	29	27	27	28	29	29	29	27	27	28	29	29	29	371	371	1	671	NaN	NaN	NaN	NaN
Q7TU65	30S ribosomal protein S16	Basic Cellular Processes	0.199271	0.24565	27.9257	28.2554	-0.329683	0.172	10	10	10	51.2	51.2	51.2	27.277	0	113.52	1662600000	52	10	10	10	1	7	7	9	8	8	6	7	7	9	8	8	6	7	7	9	8	8	6	246	246	1	57	NaN	NaN	NaN	NaN
Q7TU66	Riboflavin biosynthesis protein RibD	Central Metabolism	0.0231319	0.0226114	26.4817	26.4803	0.00140826	1	19	19	19	59.7	59.7	59.7	33.572	0	70.561	1989300000	101	19	19	19	1	17	18	17	17	16	15	17	18	17	17	16	15	17	18	17	17	16	15	295	295	1	130	NaN	NaN	NaN	NaN
Q7TU67	30S ribosomal protein S14	Basic Cellular Processes	0.0880799	0.0964535	26.5581	26.7124	-0.154294	0.472843	7	7	7	43	43	43	12.869	0	110.02	5500100000	63	7	7	7	1	7	7	7	7	7	7	7	7	7	7	7	7	7	7	7	7	7	7	114	114	1	69	NaN	NaN	NaN	NaN
Q7TU72	Possible Notch (DSL) domain	Other	0.121661	0.120664	26.7731	26.7888	-0.0157038	0.930537	20	20	20	54.1	54.1	54.1	40.144	0	53.86	2440000000	102	20	20	20	1	16	17	18	15	15	15	16	17	18	15	15	15	16	17	18	15	15	15	362	362	1	117	NaN	NaN	NaN	NaN
Q7TU75	Methylenetetrahydrofolate--tRNA-(uracil-5-)-methyltransferase TrmFO	Basic Cellular Processes	0.00271259	0.00259259	23.763	23.7023	0.0607077	0.94593	5	5	5	42	42	42	11.644	0	16.914	2342600000	44	5	5	5	1	4	5	5	5	5	5	4	5	5	5	5	5	4	5	5	5	5	5	100	100	1	47	NaN	NaN	NaN	NaN
Q7TU79	Possible Villin headpiece domain	Other	0.0869645	0.0880283	27.0814	27.132	-0.0505358	0.880795	4	4	4	38.1	38.1	38.1	9.6281	0	20.587	1137400000	19	4	4	4	1	4	4	4	4	4	4	4	4	4	4	4	4	4	4	4	4	4	4	84	84	1	25	NaN	NaN	NaN	NaN
Q7TU80	Putative Cobyrinic acid a,c-diamide synthase	Central Metabolism	0.00483146	0.00586411	24.5631	24.8843	-0.321152	0.516873	5	5	5	16	16	16	52.489	0	11.587	280070000	12	5	5	5	1	4	4	5	2	4	5	4	4	5	2	4	5	4	4	5	2	4	5	470	470	1	24	NaN	NaN	NaN	NaN
Q7TU81	Bifunctional protein FolD	Central Metabolism	0.0727395	0.0697299	27.8577	27.8252	0.0324955	0.366827	5	5	5	41.1	41.1	41.1	16.754	0	102.08	3103400000	55	5	5	5	1	4	5	4	5	5	5	4	5	4	5	5	5	4	5	4	5	5	5	146	146	1	52	NaN	NaN	NaN	NaN
Q7TU82	Mg-protoporphyrin IX chelatase	Photosynthesis	0.433023	0.403335	30.7101	30.6381	0.0719439	0.478913	6	6	6	19	19	19	52.533	0	54.384	437130000	26	6	6	6	1	4	4	6	5	5	5	4	4	6	5	5	5	4	4	6	5	5	5	464	464	1	31	NaN	NaN	NaN	NaN
Q7TU84	Possible Integrin alpha cytoplasmic region	Other	0.0270876	0.0359441	24.8213	25.2902	-0.468902	0.44047	23	23	23	67.8	67.8	67.8	32.784	0	218.25	8235200000	171	23	23	23	1	20	20	20	19	20	20	20	20	20	19	20	20	20	20	20	19	20	20	298	298	1	167	NaN	NaN	NaN	NaN
Q7TU88	30S ribosomal protein S21	Basic Cellular Processes	0.182485	0.165533	26.784	26.7095	0.0745945	0.925564	34	34	34	78.2	78.2	78.2	40.315	0	293.14	54327000000	382	34	34	34	1	31	33	32	34	34	33	31	33	32	34	34	33	31	33	32	34	34	33	362	362	1	386	NaN	NaN	NaN	NaN
Q7TU90	Anthranilate phosphoribosyltransferase	Central Metabolism	0.199226	0.187837	29.5139	29.4578	0.0561612	0.449459	2	2	2	19	19	19	11.495	0	23.175	533820000	18	2	2	2	1	2	2	2	2	2	2	2	2	2	2	2	2	2	2	2	2	2	2	100	100	1	18	NaN	NaN	NaN	NaN
Q7TU91	tRNA/rRNA methyltransferase	Basic Cellular Processes	0.00668941	0.00668303	24.9377	24.9603	-0.0225894	0.940186	4	4	4	44.8	44.8	44.8	7.0191	0	24.192	1695800000	41	4	4	4	1	4	4	4	4	4	4	4	4	4	4	4	4	4	4	4	4	4	4	58	58	1	31	NaN	NaN	NaN	NaN
Q7TU92	30S ribosomal protein S15	Basic Cellular Processes	0.0680305	0.0723031	26.0173	26.1341	-0.116772	0.203347	14	14	14	60.6	60.6	60.6	37.04	0	308.17	16890000000	187	14	14	14	1	14	14	14	13	14	13	14	14	14	13	14	13	14	14	14	13	14	13	343	343	1	153	NaN	NaN	NaN	NaN
Q7TU94	Photosystem II reaction center Psb28 protein	Photosynthesis	0.124912	0.119368	27.2884	27.2516	0.0367832	0.84657	13	13	13	35	35	35	49.144	0	140.65	918080000	67	13	13	13	1	11	10	10	10	11	12	11	10	10	10	11	12	11	10	10	10	11	12	428	428	1	69	NaN	NaN	NaN	NaN
Q7TU96	ATP phosphoribosyltransferase regulatory subunit	Central Metabolism	0.0517316	0.0509036	27.7277	27.7331	-0.00540034	0.980153	6	6	6	39.3	39.3	39.3	10.072	0	47.78	1991500000	42	6	6	6	1	6	6	6	6	6	5	6	6	6	6	6	5	6	6	6	6	6	5	89	89	1	54	NaN	NaN	NaN	NaN
Q7TU97	Branched-chain-amino-acid aminotransferase	Central Metabolism	0.167673	0.161909	29.0879	29.0684	0.0194759	0.939113	5	5	5	69.2	69.2	69.2	13.186	0	30.888	2865900000	49	5	5	5	1	5	5	5	5	5	5	5	5	5	5	5	5	5	5	5	5	5	5	117	117	1	50	NaN	NaN	NaN	NaN
Q7TU99	50S ribosomal protein L33	Basic Cellular Processes	0.0519728	0.0695996	25.1516	25.5941	-0.442535	0.236943	17	17	17	43.9	43.9	43.9	44.195	0	74.603	5896200000	115	17	17	17	1	16	16	17	15	15	17	16	16	17	15	15	17	16	16	17	15	15	17	383	383	1	136	NaN	NaN	NaN	NaN
Q7TUA0	30S ribosomal protein S18	Basic Cellular Processes	0.486002	0.517237	28.568	28.6856	-0.117599	0.451108	18	18	18	76.6	76.6	76.6	34.08	0	221.74	18519000000	185	18	18	18	1	17	17	17	16	17	16	17	17	17	16	17	16	17	17	17	16	17	16	304	304	1	185	NaN	NaN	NaN	NaN
Q7TUA1	Possible Fusion glycoprotein F0	Basic Cellular Processes	0.0935221	0.103346	26.677	26.874	-0.19692	0.722349	5	5	5	43.8	43.8	43.8	7.4735	0	11.419	818540000	27	5	5	5	1	5	4	4	5	4	4	5	4	4	5	4	4	5	4	4	5	4	4	64	64	1	32	NaN	NaN	NaN	NaN
Q7TUA3	Methionyl-tRNA formyltransferase	Basic Cellular Processes	0.00292681	0.00299992	23.3597	23.4195	-0.0598367	0.821962	5	5	5	74	74	74	8.3168	0	8.7769	3806000000	26	5	5	5	1	5	5	5	5	5	5	5	5	5	5	5	5	5	5	5	5	5	5	73	73	1	39	NaN	NaN	NaN	NaN
Q7TUA6	Bacterial regulatory proteins, Crp family	Other	0.0443483	0.058661	26.368	26.9861	-0.618071	0.663769	2	2	2	25	25	25	11.675	0	9.1546	1392300000	19	2	2	2	1	2	2	2	2	2	2	2	2	2	2	2	2	2	2	2	2	2	2	104	104	1	23	NaN	NaN	NaN	NaN
Q7TUA7	1-(5-phosphoribosyl)-5-[(5-phosphoribosylamino)methylideneamino] imidazole-4-carboxamide isomerase	Central Metabolism	0.0253031	0.0253262	26.107	26.1322	-0.0252107	0.951365	8	8	8	25.3	25.3	25.3	37.566	0	12.109	256170000	29	8	8	8	1	7	7	5	7	4	7	7	7	5	7	4	7	7	7	5	7	4	7	328	328	1	38	NaN	NaN	NaN	NaN
Q7TUA9	Elongation factor Ts	Basic Cellular Processes	0.1207	0.117872	28.1359	28.1313	0.00460625	0.979689	8	8	8	61.6	61.6	61.6	21.868	0	50.565	1999400000	66	8	8	8	1	4	8	6	8	7	8	4	8	6	8	7	8	4	8	6	8	7	8	198	198	1	71	NaN	NaN	NaN	NaN
Q7TUB0	Possible Alpha-2-macroglobulin family N-termin	Other	0.0828528	0.0970321	26.6847	26.938	-0.253253	0.242069	11	11	11	52.5	52.5	52.5	28.163	0	69.925	1997200000	50	11	11	11	1	9	10	8	10	10	10	9	10	8	10	10	10	9	10	8	10	10	10	255	255	1	65	NaN	NaN	NaN	NaN
Q7TUB1	Possible Helix-turn-helix protein, copG family	Basic Cellular Processes	0.0377714	0.0361793	25.6123	25.5761	0.0362136	0.850621	16	16	16	62.4	62.4	62.4	24.045	0	211.97	16816000000	231	16	16	16	1	14	15	13	14	14	16	14	15	13	14	14	16	14	15	13	14	14	16	218	218	1	214	NaN	NaN	NaN	NaN
Q7TUB2	Possible Major surface glycoprotein	Basic Cellular Processes	0.120713	0.131966	26.9392	27.0954	-0.156197	0.217212	4	4	4	44.8	44.8	44.8	13.342	0	189.79	2168800000	35	4	4	4	1	4	4	4	4	4	4	4	4	4	4	4	4	4	4	4	4	4	4	116	116	1	36	NaN	NaN	NaN	NaN
Q7TUB4	Possible Myosin N-terminal SH3-like domain	Other	0.0154714	0.0163476	24.2047	24.1835	0.0211735	0.997618	10	10	10	79.3	79.3	79.3	13.466	0	91.326	1552100000	57	10	10	10	1	7	9	9	8	9	9	7	9	9	8	9	9	7	9	9	8	9	9	121	121	1	60	NaN	NaN	NaN	NaN
Q7TUB9	Elongation factor Tu domain 2	Basic Cellular Processes	0.222462	0.21039	27.9654	27.9126	0.0528151	0.671611	13	13	13	61.1	61.1	61.1	10.805	0	80.007	5741300000	75	13	13	13	1	13	13	13	11	13	13	13	13	13	11	13	13	13	13	13	11	13	13	95	95	1	106	NaN	NaN	NaN	NaN
Q7TUC3	Putative O-Acetyl homoserine sulfhydrylase	Central Metabolism	0.666758	0.565868	31.6211	31.4145	0.20664	0.189524	3	3	3	29.5	29.5	29.5	12.621	0	5.4776	177120000	12	3	3	3	1	2	2	3	2	1	2	2	2	3	2	1	2	2	2	3	2	1	2	112	112	1	12	NaN	NaN	NaN	NaN
Q7TUC5	UDP-N-acetylmuramoyl-tripeptide--D-alanyl-D-alanine ligase	Central Metabolism	0.00371955	0.00355893	24.1784	24.1385	0.0399119	0.93546	8	8	8	52.4	52.4	52.4	11.966	0	85.465	6970500000	125	8	8	8	1	7	8	8	7	7	7	7	8	8	7	7	7	7	8	8	7	7	7	105	105	1	112	NaN	NaN	NaN	NaN
Q7TUC6	NADH Dehydrogenase (Complex I) subunit (Chain 4)	Energy Production and Conversion	0.00611379	0.0062316	25.0142	25.0682	-0.0539678	0.743354	27	27	27	82.1	82.1	82.1	48.059	0	323.31	86150000000	596	27	27	27	1	25	25	27	26	26	26	25	25	27	26	26	26	25	25	27	26	26	26	442	442	1	501	NaN	NaN	NaN	NaN
Q7TUC7	Histidine biosynthesis bifunctional protein HisIE	Basic Cellular Processes	0.0496928	0.0486879	26.8739	26.8747	-0.000751495	1	9	9	9	23.7	23.7	23.7	52.105	0	30.599	377950000	29	9	9	9	1	5	8	7	5	6	6	5	8	7	5	6	6	5	8	7	5	6	6	456	456	1	39	NaN	NaN	NaN	NaN
Q7TUC8	Tryptophan synthase alpha chain	Central Metabolism	0.0508145	0.0525321	27.2436	27.3207	-0.077102	0.530741	5	4	4	9.3	7.7	7.7	53.432	0	6.3845	299980000	12	5	4	4	1	3	4	4	4	4	3	2	3	3	3	3	2	2	3	3	3	3	2	494	494	1	16	NaN	NaN	NaN	NaN
Q7TUC9	Possible Helix-turn-helix domain of resolvase	Basic Cellular Processes	0.0634448	0.0673155	26.2989	26.4129	-0.114019	0.293796	11	11	11	38	38	38	25.197	0	88.888	3819600000	80	11	11	11	1	11	10	11	11	11	11	11	10	11	11	11	11	11	10	11	11	11	11	221	221	1	92	NaN	NaN	NaN	NaN
Q7TUD0	Photosystem II lipoprotein Psb27	Photosynthesis	0.0365729	0.0367002	25.8206	25.8585	-0.037969	0.935124	14	14	14	58.8	58.8	58.8	30.896	0	121.71	4516200000	98	14	14	14	1	12	13	14	12	12	12	12	13	14	12	12	12	12	13	14	12	12	12	279	279	1	114	NaN	NaN	NaN	NaN
Q7TUD1	Acetylglutamate kinase	Central Metabolism	0.105407	0.102891	28.3223	28.3171	0.00518481	0.967181	6	6	6	68.1	68.1	68.1	13.468	0	38.61	1903500000	41	6	6	6	1	5	4	5	5	5	5	5	4	5	5	5	5	5	4	5	5	5	5	116	116	1	37	NaN	NaN	NaN	NaN
Q7TUD2	PUTATIVE PRECORRIN-4 C11-METHYLTRANSFERASE	Central Metabolism	0.0378159	0.0397288	26.6664	26.7658	-0.0993601	0.22905	11	11	11	61.4	61.4	61.4	16.529	0	86.78	3426900000	136	11	11	11	1	10	10	10	10	11	11	10	10	10	10	11	11	10	10	10	10	11	11	145	145	1	124	NaN	NaN	NaN	NaN
Q7TUD3	Putative Riboflavin synthase alpha chain	Central Metabolism	0.0767332	0.0730715	27.4897	27.4473	0.0423393	0.787768	15	15	15	72.5	72.5	72.5	30.607	0	179.65	11565000000	158	15	15	15	1	12	12	13	14	12	15	12	12	13	14	12	15	12	12	13	14	12	15	284	284	1	169	NaN	NaN	NaN	NaN
Q7TUD5	tRNA (guanosine(18)-2-O)-methyltransferase	Central Metabolism	0.014199	0.0150475	25.0806	25.1928	-0.112165	0.532297	13	13	13	58.6	58.6	58.6	28.296	0	72.187	1848000000	81	13	13	13	1	11	12	12	12	12	10	11	12	12	12	12	10	11	12	12	12	12	10	251	251	1	88	NaN	NaN	NaN	NaN
Q7TUD6	Putative Cystathionine gamma-synthase	Central Metabolism	0.0521565	0.0473272	27.7535	27.6427	0.110802	0.372092	13	13	13	59.8	59.8	59.8	24.598	0	93.919	3439100000	62	13	13	13	1	10	10	11	11	10	11	10	10	11	11	10	11	10	10	11	11	10	11	219	219	1	84	NaN	NaN	NaN	NaN
Q7TUD7	Possible Cystathionine gamma-synthase	Central Metabolism	0.00780143	0.00740042	25.3477	25.3001	0.0476716	0.890345	8	8	8	42.2	42.2	42.2	25.354	0	33.172	585280000	25	8	8	8	1	6	8	5	5	6	5	6	8	5	5	6	5	6	8	5	5	6	5	223	223	1	37	NaN	NaN	NaN	NaN
Q7TUD8	DNA repair protein RecO	Basic Cellular Processes	0.00807573	0.00877417	24.4801	24.6282	-0.148036	0.533969	12	12	12	40.3	40.3	40.3	43.076	0	65.278	4439900000	60	12	12	12	1	12	9	10	11	10	10	12	9	10	11	10	10	12	9	10	11	10	10	387	387	1	74	NaN	NaN	NaN	NaN
Q7TUD9	Possible Glycosyl transferase, group 1	Central Metabolism	0.00956959	0.00862341	25.3115	25.1905	0.121052	0.217254	14	14	14	32.9	32.9	32.9	55.513	0	45.573	1303400000	54	14	14	14	1	10	12	11	12	9	11	10	12	11	12	9	11	10	12	11	12	9	11	489	489	1	80	NaN	NaN	NaN	NaN
Q7TUE0	PRECORRIN-2 C20-METHYLTRANSFERASE	Central Metabolism	0.0228006	0.0257941	25.9369	26.1405	-0.203593	0.24167	4	4	4	18.5	18.5	18.5	28.886	0	14.757	334100000	18	4	4	4	1	4	3	3	3	3	3	4	3	3	3	3	3	4	3	3	3	3	3	259	259	1	19	NaN	NaN	NaN	NaN
Q7TUE4	Possible Malic enzyme	Oxidative Stress	0.062036	0.0556865	26.1314	26.0096	0.121887	0.635342	15	15	15	48.5	48.5	48.5	43.375	0	126.71	1836900000	86	15	15	15	1	12	11	11	12	12	12	12	11	11	12	12	12	12	11	11	12	12	12	388	388	1	98	NaN	NaN	NaN	NaN
Q7TUE6	Proline iminopeptidase	Central Metabolism	0.00855157	0.00876098	24.8487	24.9119	-0.0631688	0.633641	6	6	6	32.3	32.3	32.3	27.495	0	28.156	1035300000	43	6	6	6	1	6	6	6	5	6	6	6	6	6	5	6	6	6	6	6	5	6	6	251	251	1	51	NaN	NaN	NaN	NaN
Q7TUF3	Cytochrome b6-f complex subunit 4	Photosynthesis	0.00554333	0.00729436	23.2355	23.6382	-0.402711	0.5011	6	6	6	79.2	79.2	79.2	11.865	0	76.075	2849100000	98	6	6	6	1	6	6	6	6	6	6	6	6	6	6	6	6	6	6	6	6	6	6	106	106	1	104	NaN	NaN	NaN	NaN
Q7TUF4	Carboxyl-terminal processing proteinase	Central Metabolism	0.0771599	0.0772244	28.4688	28.4971	-0.0283171	0.834679	14	14	14	36.5	36.5	36.5	36.454	0	24.885	1091100000	65	14	14	14	1	11	12	13	11	13	11	11	12	13	11	13	11	11	12	13	11	13	11	315	315	1	78	NaN	NaN	NaN	NaN
Q7TUF7	tRNA nucleotidyltransferase/poly(A) polymerase	Basic Cellular Processes	0.0123685	0.0122073	25.7789	25.7861	-0.00719643	0.983058	1	1	1	7.5	7.5	7.5	17.661	0	4.5229	132700000	8	1	1	1	1	1	1	1	1	1	1	1	1	1	1	1	1	1	1	1	1	1	1	160	160	1	11	NaN	NaN	NaN	NaN
Q7TUF9	Mg-protoporphyrin IX chelatase	Photosynthesis	0.029482	0.0280892	27.8277	27.7847	0.0429719	0.744336	23	23	23	72	72	72	47.585	0	323.31	13057000000	170	23	23	23	1	20	23	22	23	22	23	20	23	22	23	22	23	20	23	22	23	22	23	429	429	1	183	NaN	NaN	NaN	NaN
Q7TUG0	Queuine tRNA-ribosyltransferase	Basic Cellular Processes	0.0105049	0.0102	25.3853	25.3692	0.0160554	0.954841	12	12	12	34.2	34.2	34.2	48.933	0	76.447	1358000000	57	12	12	12	1	11	11	10	11	11	8	11	11	10	11	11	8	11	11	10	11	11	8	415	415	1	67	NaN	NaN	NaN	NaN
Q7TUG1	Bifunctional purine biosynthesis protein PurH	Central Metabolism	0.0688526	0.0638675	28.5737	28.4931	0.0806255	0.194872	39	39	39	60.7	60.7	60.7	78.429	0	323.31	10583000000	295	39	39	39	1	38	37	33	32	34	34	38	37	33	32	34	34	38	37	33	32	34	34	720	720	1	328	NaN	NaN	NaN	NaN
Q7TUG2	CinA-like protein	Basic Cellular Processes	0.0122342	0.0124206	25.8245	25.8743	-0.0497328	0.672926	15	15	15	49.5	49.5	49.5	41.711	0	28.138	1303000000	63	15	15	15	1	14	11	13	12	13	12	14	11	13	12	13	12	14	11	13	12	13	12	372	372	1	91	NaN	NaN	NaN	NaN
Q7TUG3	Global nitrogen regulatory protein, CRP family of transcriptional regulators	Basic Cellular Processes	0.0198245	0.0159996	25.69	25.4075	0.282469	0.368194	27	27	27	54	54	54	57.418	0	323.31	15937000000	262	27	27	27	1	25	24	27	25	25	25	25	24	27	25	25	25	25	24	27	25	25	25	517	517	1	284	NaN	NaN	NaN	NaN
Q7TUG4	dCTP deaminase	Central Metabolism	0.0900702	0.101778	27.5684	27.7723	-0.203983	0.240578	16	16	16	38.8	38.8	38.8	47.573	0	37.085	1506200000	64	16	16	16	1	12	15	13	12	12	13	12	15	13	12	12	13	12	15	13	12	12	13	433	433	1	81	NaN	NaN	NaN	NaN
Q7TUG6	Glyoxalase/Bleomycin resistance protein/Dioxygenase superfamily	Other	0.00841301	0.0086264	23.542	23.61	-0.0680567	0.844482	10	10	10	48.4	48.4	48.4	27.023	0	55.713	792580000	41	10	10	10	1	7	9	9	8	8	7	7	9	9	8	8	7	7	9	9	8	8	7	244	244	1	54	NaN	NaN	NaN	NaN
Q7TUG7	Guanosine-3,5-bis(Diphosphate) 3-diphosphatase, (PpGpp)ase	Central Metabolism	0.00371473	0.00332841	24.9314	24.802	0.129321	0.460049	8	8	8	54.3	54.3	54.3	22.095	0	69.104	3689400000	61	8	8	8	1	6	6	7	7	8	8	6	6	7	7	8	8	6	6	7	7	8	8	197	197	1	58	NaN	NaN	NaN	NaN
Q7TUG8	Nicotinate-nucleotide pyrophosphorylase:Quinolinate phosphoriobsyl transferase	Central Metabolism	0.0612083	0.0610619	27.5581	27.5838	-0.0256964	0.886652	2	2	2	13.8	13.8	13.8	14.635	0.00078616	3.7575	112990000	8	2	2	2	1	1	2	2	2	2	2	1	2	2	2	2	2	1	2	2	2	2	2	130	130	1	11	NaN	NaN	NaN	NaN
Q7TUG9	Glutathione synthetase	Central Metabolism	0.0140637	0.013954	25.5289	25.5466	-0.0176239	0.896569	19	19	19	23.7	23.7	23.7	87.01	0	121.05	1318300000	89	19	19	19	1	15	17	16	15	17	16	15	17	16	15	17	16	15	17	16	15	17	16	769	769	1	117	NaN	NaN	NaN	NaN
Q7TUH0	Tryptophan synthase beta chain	Central Metabolism	0.0471544	0.0399434	27.7071	27.4957	0.211398	0.248	15	15	15	52.8	52.8	52.8	32.366	0	66.848	3271600000	79	15	15	15	1	13	12	13	10	14	13	13	12	13	10	14	13	13	12	13	10	14	13	288	288	1	96	NaN	NaN	NaN	NaN
Q7TUH1	NAD(P)H-quinone oxidoreductase subunit I	Photosynthesis	0.0491561	0.0561002	26.7611	26.9915	-0.230376	0.529996	19	19	19	56	56	56	34.254	0	121.75	3011700000	144	19	19	19	1	17	14	16	18	16	18	17	14	16	18	16	18	17	14	16	18	16	18	307	307	1	160	NaN	NaN	NaN	NaN
Q7TUH2	Putative NADH Dehydrogenase (Complex I) subunit (Chain 6)	Photosynthesis	0.0174597	0.0121303	24.7768	24.2055	0.5713	0.894396	23	23	23	69.3	69.3	69.3	44.899	0	307.08	8898400000	142	23	23	23	1	19	20	21	20	20	22	19	20	21	20	20	22	19	20	21	20	20	22	414	414	1	170	NaN	NaN	NaN	NaN
Q7TUH4	Putative NADH Dehydrogenase (Complex I) subunit (Chain 5)	Photosynthesis	0.0105448	0.0114172	26.239	26.3817	-0.142651	0.470058	12	12	12	63	63	63	24.228	0	147.07	2788700000	77	12	12	12	1	9	11	12	11	11	11	9	11	12	11	11	11	9	11	12	11	11	11	208	208	1	93	NaN	NaN	NaN	NaN
Q7TUH5	Putative Rubisco transcriptional regulator	Carbon Fixation	0.11765	0.119762	28.64	28.6945	-0.0545642	0.474511	2	2	2	14.6	14.6	14.6	21.499	0	19.454	461280000	19	2	2	2	1	1	1	2	1	1	1	1	1	2	1	1	1	1	1	2	1	1	1	199	199	1	15	NaN	NaN	NaN	NaN
Q7TUH6	Possible Signal peptide binding domain	Membrane Transport	0.0105774	0.00956842	23.751	23.6332	0.117756	0.466293	5	5	5	8.2	8.2	8.2	73.467	0	26.946	1532200000	38	5	5	5	1	4	4	4	4	5	4	4	4	4	4	5	4	4	4	4	4	5	4	670	670	1	37	NaN	NaN	NaN	NaN
Q7TUH7	PUTATIVE THIAMINE BIOSYNTHESIS OXIDOREDUCTASE	Central Metabolism	0.0130995	0.0120573	25.691	25.601	0.0900052	0.474459	29	29	29	72.2	72.2	72.2	35.25	0	228.86	13419000000	242	29	29	29	1	28	26	27	28	27	28	28	26	27	28	27	28	28	26	27	28	27	28	317	317	1	233	NaN	NaN	NaN	NaN
Q7TUH8	Possible Bacterial type II secretion system pr	Membrane Transport	0.201513	0.194109	28.2262	28.1997	0.0264575	0.928747	4	4	4	33.6	33.6	33.6	14.484	0	10.997	183760000	19	4	4	4	1	3	4	4	4	3	3	3	4	4	4	3	3	3	4	4	4	3	3	119	119	1	21	NaN	NaN	NaN	NaN
Q7TUH9	Biotin carboxyl carrier protein of acetyl-CoA carboxylase	Central Metabolism	0.0670028	0.0612614	26.9121	26.81	0.102069	0.409783	13	13	13	34.7	34.7	34.7	41.476	0	43.088	1469400000	61	13	13	13	1	13	12	11	11	11	11	13	12	11	11	11	11	13	12	11	11	11	11	369	369	1	94	NaN	NaN	NaN	NaN
Q7TUI0	Glyceraldehyde-3-phosphate dehydrogenase	Central Metabolism	0.564806	0.544281	31.005	30.9799	0.0250479	0.476609	13	13	13	63.3	63.3	63.3	16.272	0	77.884	5347800000	70	13	13	13	1	13	12	12	11	12	10	13	12	12	11	12	10	13	12	12	11	12	10	139	139	1	83	NaN	NaN	NaN	NaN
Q7TUI1	Argininosuccinate lyase	Central Metabolism	0.0380729	0.0347485	27.5463	27.4435	0.102724	0.217714	5	5	5	39.9	39.9	39.9	18.678	0	86.476	2478900000	66	5	5	5	1	5	5	5	4	4	5	5	5	5	4	4	5	5	5	5	4	4	5	168	168	1	50	NaN	NaN	NaN	NaN
Q7TUI2	Amidophosphoribosyltransferase	Central Metabolism	0.0168995	0.0152996	26.4577	26.3422	0.115482	0.33644	29	29	29	89.1	89.1	89.1	36.99	0	323.31	99203000000	534	29	29	29	1	27	26	28	27	26	28	27	26	28	27	26	28	27	26	28	27	26	28	340	340	1	472	NaN	NaN	NaN	NaN
Q7U394	Conserved hypothetical	Uncharacterized	0.0247289	0.0238854	27.0133	26.9905	0.0227432	0.859204	28	28	28	67.8	67.8	67.8	52.366	0	159.12	9120000000	211	28	28	28	1	26	25	25	24	27	25	26	25	25	24	27	25	26	25	25	24	27	25	459	459	1	222	NaN	NaN	NaN	NaN
Q7UZF3	Uncharacterized protein	Uncharacterized	0.0774608	0.0744737	27.3068	27.2771	0.0296574	0.887159	23	23	23	57.8	57.8	57.8	54.948	0	142.97	3961700000	149	23	23	23	1	20	18	21	20	20	19	20	18	21	20	20	19	20	18	21	20	20	19	486	486	1	203	NaN	NaN	NaN	NaN
Q7UZF4	Possible protein kinase:ABC1 family	Central Metabolism	0.0110182	0.0112977	26.1858	26.2516	-0.0657959	0.666992	25	25	25	55.7	55.7	55.7	54.798	0	162.57	5624100000	151	25	25	25	1	21	23	20	19	21	20	21	23	20	19	21	20	21	23	20	19	21	20	488	488	1	160	NaN	NaN	NaN	NaN
Q7UZF5	UvrABC system protein A	Other	0.0246971	0.0242336	27.9941	27.9971	-0.00300662	0.992545	11	11	11	58.1	58.1	58.1	21.496	0	99.981	3803400000	68	11	11	11	1	11	10	11	11	10	9	11	10	11	11	10	9	11	10	11	11	10	9	191	191	1	78	NaN	NaN	NaN	NaN
Q7UZF6	Sucrose phosphate synthase	Central Metabolism	0.0101286	0.0101063	25.6626	25.6881	-0.0254917	0.940469	30	30	30	50.2	50.2	50.2	70.278	0	244.63	5295900000	210	30	30	30	1	28	28	27	27	27	28	28	28	27	27	27	28	28	28	27	27	27	28	618	618	1	248	NaN	NaN	NaN	NaN
Q7UZF9	Uncharacterized protein	Uncharacterized	0.0473336	0.0385673	25.5177	25.2693	0.248372	0.634456	66	66	66	69.7	69.7	69.7	105.95	0	323.31	29230000000	524	66	66	66	1	57	63	61	59	62	56	57	63	61	59	62	56	57	63	61	59	62	56	966	966	1	564	NaN	NaN	NaN	NaN
Q7UZG0	Argininosuccinate synthase	Central Metabolism	0.0879213	0.0839607	28.5691	28.532	0.0370833	0.744819	19	19	19	43.2	43.2	43.2	53.096	0	142.54	2076100000	70	19	19	19	1	16	16	16	16	16	15	16	16	16	16	16	15	16	16	16	16	16	15	468	468	1	112	NaN	NaN	NaN	NaN
Q7UZG1	30S ribosomal protein S6	Basic Cellular Processes	0.0635639	0.0664277	26.7074	26.8019	-0.0944646	0.593372	2	2	2	43.5	43.5	43.5	10.606	0	24.249	391810000	9	2	2	2	1	2	2	2	2	2	2	2	2	2	2	2	2	2	2	2	2	2	2	92	92	1	14	NaN	NaN	NaN	NaN
Q7UZG2	Shikimate dehydrogenase (NADP(+))	Central Metabolism	0.0693008	0.0697918	27.7209	27.7596	-0.0386925	0.887527	33	33	33	65.8	65.8	65.8	44.674	0	323.31	23138000000	385	33	33	33	1	30	32	31	31	31	30	30	32	31	31	31	30	30	32	31	31	31	30	404	404	1	395	NaN	NaN	NaN	NaN
Q7UZG3	Chaperone protein dnaK2	Basic Cellular Processes	0.564972	0.544126	31.9048	31.8783	0.0264874	0.595152	13	13	13	74	74	74	17.707	0	177	3910700000	82	13	13	13	1	13	13	13	12	13	11	13	13	13	12	13	11	13	13	13	12	13	11	154	154	1	99	NaN	NaN	NaN	NaN
Q7UZG4	NAD binding site:D-amino acid oxidase	Other	0.00381388	0.00457864	23.8628	24.1433	-0.280499	0.638368	15	15	15	60.7	60.7	60.7	31.657	0	114.83	4618500000	78	15	15	15	1	13	14	12	12	13	11	13	14	12	12	13	11	13	14	12	12	13	11	285	285	1	91	NaN	NaN	NaN	NaN
Q7UZG5	Formyltetrahydrofolate deformylase	Central Metabolism	0.0583048	0.0548774	27.4662	27.4102	0.0559432	0.730467	70	70	70	80.1	80.1	80.1	68.243	0	323.31	267810000000	1576	70	70	70	1	63	63	64	64	63	67	63	63	64	64	63	67	63	63	64	64	63	67	634	634	1	1457	NaN	NaN	NaN	NaN
Q7UZG7	Aconitate hydratase B	Central Metabolism	0.00785895	0.00764604	26.1707	26.1602	0.0105597	0.958751	7	7	7	25	25	25	41.546	0	20.576	252140000	30	7	7	7	1	5	6	5	6	3	4	5	6	5	6	3	4	5	6	5	6	3	4	360	360	1	29	NaN	NaN	NaN	NaN
Q7UZG8	Phospho-2-dehydro-3-deoxyheptonate aldolase	Central Metabolism	0.0182035	0.0165869	26.111	26.0018	0.109128	0.612073	14	14	14	70.8	70.8	70.8	32.619	0	99.224	4037300000	99	14	14	14	1	12	13	13	13	13	12	12	13	13	13	13	12	12	13	13	13	13	12	284	284	1	118	NaN	NaN	NaN	NaN
Q7UZH0	RNA polymerase sigma factor	Basic Cellular Processes	0.00855259	0.00873154	24.9528	25.0129	-0.0600789	0.70284	29	29	29	40.6	40.6	40.6	94.883	0	146.1	3423900000	188	29	29	29	1	26	25	25	23	26	23	26	25	25	23	26	23	26	25	25	23	26	23	857	857	1	202	NaN	NaN	NaN	NaN
Q7UZH2	Putative uroporphyrin-III C-methyltransferase	Central Metabolism	0.0185223	0.0178764	25.6866	25.6697	0.0168603	0.964044	18	18	18	55.8	55.8	55.8	39.418	0	71.589	1984000000	89	18	18	18	1	17	12	14	13	13	10	17	12	14	13	13	10	17	12	14	13	13	10	355	355	1	113	NaN	NaN	NaN	NaN
Q7UZH3	Aminotransferases class-IV	Central Metabolism	0.00540546	0.00551942	23.9919	24.0495	-0.0576719	0.529947	7	6	6	21.2	19.2	19.2	38.319	0	18.274	460390000	26	7	6	6	1	7	7	5	7	7	6	6	6	4	6	6	5	6	6	4	6	6	5	339	339	1	35	NaN	NaN	NaN	NaN
Q7UZH4	Possible p-aminobenzoate synthetase	Central Metabolism	0.00458784	0.00493117	24.4185	24.5552	-0.136709	0.757598	19	19	19	86.6	86.6	86.6	28.091	0	76.958	2554800000	78	19	19	19	1	16	15	15	17	16	17	16	15	15	17	16	17	16	15	15	17	16	17	261	261	1	127	NaN	NaN	NaN	NaN
Q7UZH5	7-cyano-7-deazaguanine synthase	Central Metabolism	0.0133871	0.0129659	25.0043	24.9807	0.0236047	0.945831	9	9	9	29.5	29.5	29.5	32.178	0	11.692	352540000	31	9	9	9	1	7	7	7	6	7	4	7	7	7	6	7	4	7	7	7	6	7	4	275	275	1	40	NaN	NaN	NaN	NaN
Q7UZH7	CTP synthase	Central Metabolism	0.0713787	0.069561	28.6766	28.6687	0.00798098	0.960248	9	9	9	28.2	28.2	28.2	50.005	0	29.63	694230000	24	9	9	9	1	7	8	6	7	5	6	7	8	6	7	5	6	7	8	6	7	5	6	439	439	1	44	NaN	NaN	NaN	NaN
Q7UZH8	Aspartate--tRNA(Asp/Asn) ligase	Central Metabolism	0.0506666	0.0489494	28.3405	28.3192	0.0213369	0.824707	7	7	7	50	50	50	25.066	0	39.179	927380000	31	7	7	7	1	7	7	7	7	7	7	7	7	7	7	7	7	7	7	7	7	7	7	224	224	1	43	NaN	NaN	NaN	NaN
Q7UZH9	Arginase family	Central Metabolism	0.0165534	0.0162934	25.702	25.708	-0.00597636	0.964112	29	29	29	71.3	71.3	71.3	59.828	0	274.62	20952000000	260	29	29	29	1	23	24	28	23	25	24	23	24	28	23	25	24	23	24	28	23	25	24	536	536	1	239	NaN	NaN	NaN	NaN
Q7UZI0	Polyamine aminopropyltransferase	Basic Cellular Processes	0.0091675	0.0101639	24.4724	24.9647	-0.492314	0.823297	42	42	42	72.1	72.1	72.1	67.993	0	323.31	23170000000	403	42	42	42	1	35	39	38	38	38	38	35	39	38	38	38	38	35	39	38	38	38	38	598	598	1	407	NaN	NaN	NaN	NaN
Q7UZI2	Conserved hypothetical	Uncharacterized	0.00971466	0.0097139	23.4995	23.5268	-0.0273298	0.978759	7	7	7	29.6	29.6	29.6	32.571	0	24.73	1012400000	53	7	7	7	1	5	6	5	5	5	6	5	6	5	5	5	6	5	6	5	5	5	6	294	294	1	44	NaN	NaN	NaN	NaN
Q7UZI3	Valine--tRNA ligase	Basic Cellular Processes	0.0107074	0.0104477	26.7172	26.7096	0.00763257	0.889315	2	2	2	9.5	9.5	9.5	32.518	0	12.996	282640000	13	2	2	2	1	1	2	2	2	2	2	1	2	2	2	2	2	1	2	2	2	2	2	283	283	1	12	NaN	NaN	NaN	NaN
Q7UZI6	ATP-dependent DNA ligase	Basic Cellular Processes	0.00293655	0.00340323	23.799	24.0403	-0.241387	0.162919	3	3	3	27.3	27.3	27.3	11.797	0	8.3273	217980000	11	3	3	3	1	3	3	3	3	2	3	3	3	3	3	2	3	3	3	3	3	2	3	110	110	1	18	NaN	NaN	NaN	NaN
Q7UZI7	Uncharacterized protein	Uncharacterized	0.0695434	0.0719245	26.6931	26.7695	-0.0763849	0.304333	54	54	54	56	56	56	106.31	0	323.31	8862700000	321	54	54	54	1	47	47	44	46	47	47	47	47	44	46	47	47	47	47	44	46	47	47	918	918	1	369	NaN	NaN	NaN	NaN
Q7UZI9	Uncharacterized protein	Uncharacterized	0.0226009	0.0249217	25.6941	25.8607	-0.166526	0.335898	10	10	10	24.8	24.8	24.8	51.113	0	28.929	436760000	42	10	10	10	1	5	6	9	8	8	8	5	6	9	8	8	8	5	6	9	8	8	8	443	443	1	53	NaN	NaN	NaN	NaN
Q7UZJ0	Replicative DNA helicase	Basic Cellular Processes	0.0271711	0.0263212	27.0632	27.0454	0.0177568	0.89475	8	8	8	51.8	51.8	51.8	15.725	0	34.71	2630400000	59	8	8	8	1	7	8	8	8	8	8	7	8	8	8	8	8	7	8	8	8	8	8	139	139	1	61	NaN	NaN	NaN	NaN
Q7UZJ1	50S ribosomal protein L9	Basic Cellular Processes	0.12702	0.139942	27.6816	27.8495	-0.167908	0.098	6	6	6	39.3	39.3	39.3	25.145	0	14.326	1165600000	35	6	6	6	1	6	5	5	5	5	5	6	5	5	5	5	5	6	5	5	5	5	5	214	214	1	46	NaN	NaN	NaN	NaN
Q7UZJ3	Uncharacterized protein	Uncharacterized	0.0343723	0.0363404	26.4339	26.5424	-0.108491	0.285606	14	14	14	50	50	50	51.258	0	260.36	5096400000	109	14	14	14	1	13	12	14	13	13	13	13	12	14	13	13	13	13	12	14	13	13	13	460	460	1	117	NaN	NaN	NaN	NaN
Q7UZJ4	Uncharacterized protein	Uncharacterized	0.00623629	0.00583659	24.8336	24.7653	0.0683123	0.889206	10	10	10	68.9	68.9	68.9	16.385	0	48.219	7741000000	89	10	10	10	1	10	10	10	10	10	10	10	10	10	10	10	10	10	10	10	10	10	10	151	151	1	89	NaN	NaN	NaN	NaN
Q7UZJ5	Glycine dehydrogenase (aminomethyl-transferring)	Central Metabolism	0.00551427	0.00540325	25.8089	25.8359	-0.0269922	0.978009	6	6	6	30.2	30.2	30.2	26.651	0	22.724	993870000	37	6	6	6	1	6	4	5	4	5	4	6	4	5	4	5	4	6	4	5	4	5	4	235	235	1	38	NaN	NaN	NaN	NaN
Q7UZJ7	SqdX	Other	0.0277389	0.026342	26.8046	26.7601	0.0444991	0.667702	10	10	10	27	27	27	47.354	0	67.386	782830000	40	10	10	10	1	7	8	6	6	9	6	7	8	6	6	9	6	7	8	6	6	9	6	429	429	1	52	NaN	NaN	NaN	NaN
Q7UZJ8	Sulfolipid (UDP-sulfoquinovose) biosynthesis protein	Central Metabolism	0.102966	0.0909461	28.7729	28.6193	0.15358	0.449741	23	23	23	33.5	33.5	33.5	108.15	0	149.43	2838900000	100	23	23	23	1	14	18	18	16	16	19	14	18	18	16	16	19	14	18	18	16	16	19	969	969	1	129	NaN	NaN	NaN	NaN
Q7UZJ9	Thiazole synthase	Central Metabolism	0.036066	0.0359301	26.6746	26.6991	-0.0244077	0.907456	16	16	16	57.3	57.3	57.3	41.762	0	82.587	5256800000	133	16	16	16	1	15	15	15	14	14	14	15	15	15	14	14	14	15	15	15	14	14	14	377	377	1	137	NaN	NaN	NaN	NaN
Q7UZK0	Putative photosystem I assembly related protein Ycf37	Photosynthesis	0.0146509	0.0157487	24.8536	24.983	-0.129426	0.730944	29	29	29	75.1	75.1	75.1	44.462	0	323.31	30742000000	409	29	29	29	1	27	26	25	27	27	25	27	26	25	27	27	25	27	26	25	27	27	25	397	397	1	368	NaN	NaN	NaN	NaN
Q7UZK1	50S ribosomal protein L20	Basic Cellular Processes	0.0547076	0.057565	26.0704	26.1747	-0.10423	0.476275	12	12	12	49.4	49.4	49.4	28.567	0	84.638	3515300000	91	12	12	12	1	12	12	12	12	12	12	12	12	12	12	12	12	12	12	12	12	12	12	265	265	1	112	NaN	NaN	NaN	NaN
Q7UZK4	Glycosyl transferase, family 2	Central Metabolism	0.00580319	0.00529794	24.7477	24.6459	0.101748	0.337897	9	9	9	48.6	48.6	48.6	21.359	0	40.943	673050000	31	9	9	9	1	7	9	5	6	5	7	7	9	5	6	5	7	7	9	5	6	5	7	185	185	1	42	NaN	NaN	NaN	NaN
Q7UZK5	DNA polymerase III subunit gamma/tau	Basic Cellular Processes	0.0059254	0.00633358	25.1937	25.3175	-0.12376	0.699628	3	3	3	20.9	20.9	20.9	13.478	0	13.399	1002500000	35	3	3	3	1	3	3	3	3	3	3	3	3	3	3	3	3	3	3	3	3	3	3	115	115	1	28	NaN	NaN	NaN	NaN
Q7UZK6	ATP-dependent Clp protease ATP-binding subunit ClpX	Basic Cellular Processes	0.0483738	0.0484621	27.8793	27.91	-0.0306314	0.875294	10	10	10	32.1	32.1	32.1	49.208	0	32.553	665160000	38	10	10	10	1	9	7	8	6	6	7	9	7	8	6	6	7	9	7	8	6	6	7	433	433	1	47	NaN	NaN	NaN	NaN
Q7UZK7	ATP-dependent Clp protease proteolytic subunit 3	Basic Cellular Processes	0.175729	0.183744	28.6596	28.751	-0.0914116	0.337651	19	19	19	34	34	34	65.787	0	112.94	1940500000	100	19	19	19	1	18	17	16	15	17	16	18	17	16	15	17	16	18	17	16	15	17	16	579	579	1	133	NaN	NaN	NaN	NaN
Q7UZK8	Trigger factor	Basic Cellular Processes	0.0400379	0.0417325	27.6618	27.7509	-0.0891329	0.551267	29	29	29	53.6	53.6	53.6	50.606	0	291.51	13133000000	252	29	29	29	1	28	28	28	28	28	28	28	28	28	28	28	28	28	28	28	28	28	28	455	455	1	293	NaN	NaN	NaN	NaN
Q7UZK9	4-hydroxy-tetrahydrodipicolinate synthase	Central Metabolism	0.057583	0.0540916	27.5374	27.4781	0.0592887	0.632768	9	9	9	41.9	41.9	41.9	23.692	0	47.367	5887000000	87	9	9	9	1	9	8	8	9	7	7	9	8	8	9	7	7	9	8	8	9	7	7	215	215	1	80	NaN	NaN	NaN	NaN
Q7UZL0	Ribonuclease J	Basic Cellular Processes	0.0477031	0.0456151	28.4115	28.3743	0.0371634	0.799322	50	50	50	76.7	76.7	76.7	53.533	0	323.31	19134000000	435	50	50	50	1	42	45	44	46	45	49	42	45	44	46	45	49	42	45	44	46	45	49	473	473	1	503	NaN	NaN	NaN	NaN
Q7UZL2	Uncharacterized protein	Uncharacterized	0.0606321	0.0660479	27.4464	27.5989	-0.152473	0.367286	16	16	16	59.3	59.3	59.3	32.606	0	236.01	8345100000	169	16	16	16	1	15	16	16	16	16	16	15	16	16	16	16	16	15	16	16	16	16	16	302	302	1	181	NaN	NaN	NaN	NaN
Q7UZL3	UvrABC system protein B	Other	0.00791462	0.00877694	25.8277	26.0231	-0.195408	0.663305	43	43	43	65.7	65.7	65.7	74.308	0	323.31	20114000000	405	43	43	43	1	41	40	41	40	42	42	41	40	41	40	42	42	41	40	41	40	42	42	667	667	1	484	NaN	NaN	NaN	NaN
Q7UZL4	Aspartate kinase	Central Metabolism	0.0251453	0.0236392	27.2995	27.24	0.05948	0.663125	13	13	13	65.8	65.8	65.8	28.691	0	157.04	7597700000	96	13	13	13	1	12	12	12	12	13	13	12	12	12	12	13	13	12	12	12	12	13	13	269	269	1	111	NaN	NaN	NaN	NaN
Q7UZL5	Uncharacterized protein	Uncharacterized	0.0161779	0.0122823	25.8045	25.4794	0.325124	0.60595	27	27	27	48.6	48.6	48.6	77.246	0	186.75	2451900000	115	27	27	27	1	13	22	23	21	19	24	13	22	23	21	19	24	13	22	23	21	19	24	679	679	1	155	NaN	NaN	NaN	NaN
Q7UZL6	DNA mismatch repair protein MutS	Basic Cellular Processes	0.00419597	0.00433446	25.36	25.4355	-0.0755533	0.540285	33	33	33	62.5	62.5	62.5	63.343	0	297.87	12276000000	237	33	33	33	1	30	28	30	30	31	29	30	28	30	30	31	29	30	28	30	30	31	29	586	586	1	272	NaN	NaN	NaN	NaN
Q7UZL7	6,7-dimethyl-8-ribityllumazine synthase	Central Metabolism	0.223169	0.218486	28.5599	28.5566	0.00325012	0.989724	7	7	7	29.7	29.7	29.7	37.843	0	38.944	747740000	30	7	7	7	1	4	5	5	4	4	6	4	5	5	4	4	6	4	5	5	4	4	6	333	333	1	38	NaN	NaN	NaN	NaN
Q7UZL8	Possible transcription regulator	Basic Cellular Processes	0.0595591	0.0643526	26.5047	26.6497	-0.144991	0.573798	26	26	26	32.8	32.8	32.8	103.84	0	96.326	2136800000	118	26	26	26	1	20	24	20	21	22	20	20	24	20	21	22	20	20	24	20	21	22	20	915	915	1	147	NaN	NaN	NaN	NaN
Q7UZM0	Putative acetyltransferase, GNAT family	Central Metabolism	0.00874443	0.00867428	23.8051	23.837	-0.0318921	0.952252	9	9	9	78.5	78.5	78.5	17.207	0	246.03	12887000000	115	9	9	9	1	9	9	9	9	9	9	9	9	9	9	9	9	9	9	9	9	9	9	158	158	1	108	NaN	NaN	NaN	NaN
Q7UZM1	Protein translocase subunit SecA	Membrane Transport	0.0253795	0.0242042	28.0009	27.9607	0.0402425	0.226222	6	6	6	53.1	53.1	53.1	16.38	0	33.082	2673100000	39	6	6	6	1	6	6	6	6	6	6	6	6	6	6	6	6	6	6	6	6	6	6	143	143	1	52	NaN	NaN	NaN	NaN
Q7UZM2	Serine acetyltransferase	Central Metabolism	0.0439968	0.0459412	26.8441	26.9328	-0.0887432	0.513585	3	3	3	19.2	19.2	19.2	17.279	0	11.353	271420000	17	3	3	3	1	3	3	3	3	3	3	3	3	3	3	3	3	3	3	3	3	3	3	151	151	1	24	NaN	NaN	NaN	NaN
Q7UZM3	Possible transcriptional regulator	Basic Cellular Processes	0.0337842	0.0324536	26.8659	26.8363	0.0296377	0.895856	82	82	82	79.3	79.3	79.3	107.76	0	323.31	37150000000	716	82	82	82	1	79	77	79	79	72	78	79	77	79	79	72	78	79	77	79	79	72	78	943	943	1	790	NaN	NaN	NaN	NaN
Q7UZM4	DNA gyrase subunit B	Basic Cellular Processes	0.0576674	0.0559939	28.6588	28.6444	0.014342	0.891689	11	11	11	48	48	48	26.618	0	65.081	4409000000	90	11	11	11	1	10	10	10	10	11	10	10	10	10	10	11	10	10	10	10	10	11	10	244	244	1	95	NaN	NaN	NaN	NaN
Q7UZM8	Magnesium transporter MgtE	Membrane Transport	0.154904	0.135607	29.5974	29.4382	0.159225	0.44587	17	17	17	64.7	64.7	64.7	36.043	0	93.903	4004300000	121	17	17	17	1	15	14	16	16	16	13	15	14	16	16	16	13	15	14	16	16	16	13	323	323	1	122	NaN	NaN	NaN	NaN
Q7UZM9	Type II alternative RNA polymerase sigma factor, sigma-70 family	Basic Cellular Processes	0.0064006	0.00626822	24.483	24.5071	-0.0240498	0.977261	60	60	60	72.7	72.7	72.7	73.507	0	323.31	31380000000	490	60	60	60	1	55	55	56	55	56	55	55	55	56	55	56	55	55	55	56	55	56	55	655	655	1	553	NaN	NaN	NaN	NaN
Q7UZN0	Possible alpha/beta hydrolase superfamily	Other	0.0211293	0.0244986	26.1032	26.3444	-0.241213	0.161818	29	29	29	58.4	58.4	58.4	51.436	0	323.31	43487000000	471	29	29	29	1	28	28	28	29	28	29	28	28	28	29	28	29	28	28	28	29	28	29	469	469	1	451	NaN	NaN	NaN	NaN
Q7UZN1	Putative carbohydrate kinase	Central Metabolism	0.00739623	0.00714508	24.7114	24.6899	0.0214462	0.951978	12	11	11	42	39.9	39.9	37.869	0	37.291	785990000	43	12	11	11	1	11	10	10	9	9	8	10	9	9	8	8	7	10	9	9	8	8	7	333	333	1	67	NaN	NaN	NaN	NaN
Q7UZN2	Uncharacterized protein	Uncharacterized	0.00742357	0.00737824	23.5259	23.5289	-0.00303713	1	7	7	7	28.3	28.3	28.3	35.023	0	37.348	1385900000	33	7	7	7	1	6	6	7	5	5	6	6	6	7	5	5	6	6	6	7	5	5	6	304	304	1	41	NaN	NaN	NaN	NaN
Q7UZN3	Adenosylhomocysteinase	Central Metabolism	0.0587479	0.0558955	28.2135	28.169	0.044419	0.587363	11	11	11	30.4	30.4	30.4	37.186	0	36.878	941520000	48	11	11	11	1	9	10	11	10	9	10	9	10	11	10	9	10	9	10	11	10	9	10	332	332	1	64	NaN	NaN	NaN	NaN
Q7UZN5	Single-stranded DNA-binding protein	Basic Cellular Processes	0.0475368	0.0465078	25.9652	25.9613	0.00396601	0.997463	3	3	3	21.4	21.4	21.4	16.481	0	5.3657	132580000	8	3	3	3	1	2	3	2	2	2	2	2	3	2	2	2	2	2	3	2	2	2	2	145	145	1	13	NaN	NaN	NaN	NaN
Q7UZN6	Rod shape determining protein	Basic Cellular Processes	0.145623	0.1473	29.0914	29.1352	-0.0437419	0.626594	29	29	29	48.7	48.7	48.7	51.826	0	216.42	25956000000	279	29	29	29	1	25	27	29	27	27	28	25	27	29	27	27	28	25	27	29	27	27	28	472	472	1	291	NaN	NaN	NaN	NaN
Q7UZN7	Putative rod shape-determining protein	Basic Cellular Processes	0.00868464	0.00877645	24.5305	24.5754	-0.0449015	0.805718	12	12	12	88.6	88.6	88.6	13.815	0	46.095	2969000000	82	12	12	12	1	11	12	12	11	12	12	11	12	12	11	12	12	11	12	12	11	12	12	123	123	1	105	NaN	NaN	NaN	NaN
Q7UZN9	Two-component response regulator	Other	0.100666	0.105565	28.0597	28.1585	-0.0988433	0.369912	20	20	20	57.7	57.7	57.7	37.254	0	157.93	36893000000	249	20	20	20	1	19	19	20	19	20	20	19	19	20	19	20	20	19	19	20	19	20	20	350	350	1	261	NaN	NaN	NaN	NaN
Q7UZP0	Lysine--tRNA ligase	Basic Cellular Processes	0.049802	0.0494946	28.0916	28.1116	-0.0199966	0.880638	7	7	7	42.2	42.2	42.2	28.423	0	38.745	647770000	34	7	7	7	1	5	7	7	7	7	5	5	7	7	7	7	5	5	7	7	7	7	5	249	249	1	44	NaN	NaN	NaN	NaN
Q7UZP1	Uncharacterized protein	Uncharacterized	0.0565076	0.0569865	25.6453	25.6871	-0.0418262	0.893987	20	20	20	71.4	71.4	71.4	27.421	0	192.83	12377000000	242	20	20	20	1	20	20	20	20	20	20	20	20	20	20	20	20	20	20	20	20	20	20	248	248	1	248	NaN	NaN	NaN	NaN
Q7UZP3	Holliday junction ATP-dependent DNA helicase RuvB	Basic Cellular Processes	0.010174	0.00987757	25.2605	25.246	0.0145098	0.754987	35	35	35	69.3	69.3	69.3	58.823	0	322.53	11329000000	267	35	35	35	1	33	33	32	32	29	30	33	33	32	32	29	30	33	33	32	32	29	30	512	512	1	276	NaN	NaN	NaN	NaN
Q7UZP5	Zinc metallopeptidase M20/M25/M40 family	Basic Cellular Processes	0.030592	0.0297396	26.9786	26.9686	0.0100562	0.966954	4	4	4	65.1	65.1	65.1	9.5036	0	15.92	738830000	29	4	4	4	1	3	3	4	4	3	4	3	3	4	4	3	4	3	3	4	4	3	4	83	83	1	36	NaN	NaN	NaN	NaN
Q7UZP7	Phosphomethylpyrimidine synthase	Central Metabolism	0.0355235	0.033767	27.437	27.3917	0.045325	0.806633	11	11	11	29.8	29.8	29.8	39.732	0	33.964	902570000	67	11	11	11	1	9	11	10	11	10	10	9	11	10	11	10	10	9	11	10	11	10	10	352	352	1	68	NaN	NaN	NaN	NaN
Q7UZP8	Transketolase	Carbon Fixation	0.112342	0.10489	29.6488	29.5784	0.0703939	0.574024	20	20	20	63.5	63.5	63.5	41.815	0	139.13	5016100000	118	20	20	20	1	16	17	16	16	15	17	16	17	16	16	15	17	16	17	16	16	15	17	386	386	1	127	NaN	NaN	NaN	NaN
Q7UZP9	3-oxoacyl-[acyl-carrier-protein] synthase 2	Central Metabolism	0.066526	0.0658329	28.2024	28.2151	-0.0126934	0.946859	27	27	27	57.7	57.7	57.7	50.873	0	199.24	9147500000	278	27	27	27	1	24	26	24	24	23	22	24	26	24	24	23	22	24	26	24	24	23	22	456	456	1	294	NaN	NaN	NaN	NaN
Q7UZQ0	Acyl carrier protein	Central Metabolism	0.15675	0.16423	27.0666	27.1592	-0.0925598	0.755097	40	40	40	75.4	75.4	75.4	72.987	0	323.31	58929000000	715	40	40	40	1	34	37	36	34	33	34	34	37	36	34	33	34	34	37	36	34	33	34	668	668	1	660	NaN	NaN	NaN	NaN
Q7UZQ1	Photosystem I iron-sulfur center	Photosynthesis	0.172019	0.167524	27.2188	27.2039	0.0149873	0.979712	17	17	17	71.5	71.5	71.5	43.368	0	227.65	15154000000	224	17	17	17	1	15	15	14	17	16	14	15	15	14	17	16	14	15	15	14	17	16	14	414	414	1	189	NaN	NaN	NaN	NaN
Q7UZQ2	Glutamine--fructose-6-phosphate aminotransferase [isomerizing]	Central Metabolism	0.0464124	0.0407833	28.2918	28.1338	0.158046	0.224533	2	2	2	31.2	31.2	31.2	8.6345	0	35.046	1631100000	21	2	2	2	1	2	2	2	2	2	2	2	2	2	2	2	2	2	2	2	2	2	2	80	80	1	13	NaN	NaN	NaN	NaN
Q7UZQ4	Uncharacterized protein	Uncharacterized	0.0302782	0.0276943	24.2865	24.1591	0.127353	0.896908	5	5	5	64.2	64.2	64.2	8.8281	0	42.096	2887500000	42	5	5	5	1	5	5	5	5	5	5	5	5	5	5	5	5	5	5	5	5	5	5	81	81	1	56	NaN	NaN	NaN	NaN
Q7UZQ5	Ribonuclease 3	Basic Cellular Processes	0.0198839	0.0202319	25.721	25.775	-0.0540231	0.891583	37	37	37	59.1	59.1	59.1	69.487	0	323.31	22545000000	365	37	37	37	1	31	32	32	33	34	33	31	32	32	33	34	33	31	32	32	33	34	33	631	631	1	352	NaN	NaN	NaN	NaN
Q7UZQ7	Alpha-1,4 glucan phosphorylase	Central Metabolism	0.0313362	0.0290205	28.1517	28.0688	0.0828902	0.238171	2	2	2	47.5	47.5	47.5	6.8589	0	9.945	186740000	8	2	2	2	1	2	2	2	1	2	2	2	2	2	1	2	2	2	2	2	1	2	2	61	61	1	11	NaN	NaN	NaN	NaN
Q7UZQ8	Putative Na+/H+ antiporter, CPA2 family	Membrane Transport	0.0156085	0.0169362	26.2367	26.391	-0.154311	0.638899	7	7	7	32.5	32.5	32.5	28.697	0	23.091	681330000	31	7	7	7	1	4	6	6	6	6	5	4	6	6	6	6	5	4	6	6	6	6	5	249	249	1	37	NaN	NaN	NaN	NaN
Q7UZQ9	Uncharacterized protein	Uncharacterized	0.0411763	0.0380867	27.0503	26.9673	0.0830568	0.400838	45	45	45	57.3	57.3	57.3	96.361	0	323.31	18829000000	383	45	45	45	1	42	43	42	43	42	41	42	43	42	43	42	41	42	43	42	43	42	41	848	848	1	431	NaN	NaN	NaN	NaN
Q7UZR1	Uncharacterized protein	Uncharacterized	0.00243589	0.00266577	23.515	23.708	-0.192972	0.81447	7	7	7	15.6	15.6	15.6	46.788	0	19.87	1422200000	45	7	7	7	1	6	7	7	7	7	6	6	7	7	7	7	6	6	7	7	7	7	6	455	455	1	58	NaN	NaN	NaN	NaN
Q7UZR2	Isocitrate dehydrogenase [NADP]	Central Metabolism	0.127692	0.122934	29.3379	29.3126	0.0253023	0.891791	21	21	21	66.4	66.4	66.4	34.042	0	160.4	7491000000	198	21	21	21	1	19	16	21	19	21	19	19	16	21	19	21	19	19	16	21	19	21	19	301	301	1	191	NaN	NaN	NaN	NaN
Q7UZR4	Heme oxygenase	Central Metabolism	0.0229478	0.024304	25.8533	25.9669	-0.113558	0.624249	8	8	8	19.2	19.2	19.2	51.702	0	9.1934	260710000	22	8	8	8	1	6	7	5	5	7	6	6	7	5	5	7	6	6	7	5	5	7	6	452	452	1	36	NaN	NaN	NaN	NaN
Q7UZR5	Low molecular weight phosphotyrosine protein phosphatase	Basic Cellular Processes	0.00901033	0.00855079	23.676	23.7802	-0.104204	0.970677	29	29	29	58.4	58.4	58.4	52.629	0	302.9	28366000000	335	29	29	29	1	29	28	29	29	28	29	29	28	29	29	28	29	29	28	29	29	28	29	474	474	1	308	NaN	NaN	NaN	NaN
Q7UZR6	Bifunctional pantoate ligase/cytidylate kinase	Central Metabolism	0.0193543	0.0198092	26.7225	26.7849	-0.0623989	0.51844	16	16	16	59.3	59.3	59.3	27.243	0	43.733	2458500000	87	16	16	16	1	12	13	13	11	13	11	12	13	13	11	13	11	12	13	13	11	13	11	236	236	1	92	NaN	NaN	NaN	NaN
Q7UZR7	Phosphoribosylformylglycinamidine cyclo-ligase	Central Metabolism	0.0541625	0.0488006	27.6479	27.5292	0.118674	0.473319	4	4	4	28.7	28.7	28.7	17.79	0	17.74	223780000	18	4	4	4	1	2	2	3	4	3	3	2	2	3	4	3	3	2	2	3	4	3	3	157	157	1	23	NaN	NaN	NaN	NaN
Q7UZS0	Uncharacterized protein	Uncharacterized	0.0304804	0.0318495	24.8378	24.9307	-0.0929305	0.799541	21	21	21	39.8	39.8	39.8	58.294	0	110.75	4237700000	123	21	21	21	1	18	19	20	18	18	20	18	19	20	18	18	20	18	19	20	18	18	20	510	510	1	129	NaN	NaN	NaN	NaN
Q7UZS1	Putative ribonuclease D	Basic Cellular Processes	0.0472379	0.0430363	26.7507	26.6446	0.106078	0.0991111	22	22	22	53.9	53.9	53.9	38.869	0	323.31	8356600000	207	22	22	22	1	21	21	21	20	22	21	21	21	21	20	22	21	21	21	21	20	22	21	347	347	1	211	NaN	NaN	NaN	NaN
Q7UZS2	Uncharacterized protein	Uncharacterized	0.0104545	0.01228	24.2727	24.5511	-0.278397	0.87281	5	5	5	53.4	53.4	53.4	10.02	0	9.5845	611350000	28	5	5	5	1	4	4	3	5	5	5	4	4	3	5	5	5	4	4	3	5	5	5	88	88	1	31	NaN	NaN	NaN	NaN
Q7UZS3	Oxygen-dependent coproporphyrinogen-III oxidase	Photosynthesis	0.0121847	0.011797	25.4744	25.4606	0.013827	0.957853	18	18	18	67.6	67.6	67.6	24.708	0	259.86	8556400000	168	18	18	18	1	17	17	18	17	17	17	17	17	18	17	17	17	17	17	18	17	17	17	213	213	1	188	NaN	NaN	NaN	NaN
Q7UZS4	Iron-sulfur cluster carrier protein	Central Metabolism	0.0390574	0.0389885	27.2126	27.2387	-0.0260385	0.889819	4	4	4	22.6	22.6	22.6	21.099	0	8.7287	222440000	22	4	4	4	1	4	3	3	3	1	3	4	3	3	3	1	3	4	3	3	3	1	3	186	186	1	26	NaN	NaN	NaN	NaN
Q7UZS6	Uncharacterized protein	Uncharacterized	0.019296	0.0189001	26.5535	26.5523	0.00117048	0.996815	11	11	11	36.8	36.8	36.8	39.848	0	69.504	1354300000	69	11	11	11	1	10	9	11	11	9	10	10	9	11	11	9	10	10	9	11	11	9	10	342	342	1	89	NaN	NaN	NaN	NaN
Q7UZS7	Photosystem I protein PsaD	Photosynthesis	0.286258	0.301475	28.7447	28.8461	-0.101426	0.474612	23	23	23	72.7	72.7	72.7	38.754	0	231.07	7875600000	216	23	23	23	1	21	20	21	22	22	21	21	20	21	22	22	21	21	20	21	22	22	21	355	355	1	208	NaN	NaN	NaN	NaN
Q7UZS8	Anthranilate synthase component I and chorismate binding enzyme	Central Metabolism	0.0304878	0.0275344	27.367	27.2472	0.119853	0.320284	23	23	23	45.3	45.3	45.3	51.713	0	174.22	3943200000	150	23	23	23	1	23	23	23	21	23	21	23	23	23	21	23	21	23	23	23	21	23	21	455	455	1	169	NaN	NaN	NaN	NaN
Q7UZS9	Glutamate--cysteine ligase	Central Metabolism	0.00906525	0.00903069	25.1718	25.1934	-0.0215537	0.94732	15	15	15	84.3	84.3	84.3	15.675	0	176.26	14424000000	180	15	15	15	1	14	14	13	14	15	14	14	14	13	14	15	14	14	14	13	14	15	14	140	140	1	194	NaN	NaN	NaN	NaN
Q7UZT0	Phosphoenolpyruvate carboxylase	Carbon Fixation	0.0511918	0.0483702	29.082	29.0282	0.053847	0.250126	31	31	31	70.2	70.2	70.2	57.322	0	285.97	10332000000	265	31	31	31	1	30	28	26	29	29	30	30	28	26	29	29	30	30	28	26	29	29	30	506	506	1	312	NaN	NaN	NaN	NaN
Q7UZT1	Uncharacterized protein	Uncharacterized	0.0190605	0.0192346	24.905	24.9557	-0.050745	0.923308	15	15	15	49.7	49.7	49.7	43.607	0	66.416	1659300000	81	15	15	15	1	15	14	13	11	14	13	15	14	13	11	14	13	15	14	13	11	14	13	372	372	1	112	NaN	NaN	NaN	NaN
Q7UZT2	DNA replication and repair protein RecF	Basic Cellular Processes	0.016103	0.0152914	25.7931	25.7444	0.048748	0.916389	74	74	74	69.5	69.5	69.5	114.38	0	323.31	40712000000	598	74	74	74	1	65	65	69	67	67	71	65	65	69	67	67	71	65	65	69	67	67	71	989	989	1	673	NaN	NaN	NaN	NaN
Q7UZT4	Uncharacterized protein	Uncharacterized	0.00406089	0.00495139	23.5565	23.8755	-0.319043	0.529802	6	6	6	45.9	45.9	45.9	16.727	0	21.706	672820000	32	6	6	6	1	4	5	5	4	5	4	4	5	5	4	5	4	4	5	5	4	5	4	148	148	1	30	NaN	NaN	NaN	NaN
Q7UZT5	ATP:corrinoid adenosyltransferase BtuR/CobO/CobP	Central Metabolism	0.00642692	0.00636629	24.7307	24.7427	-0.0119432	0.952286	9	9	9	28.5	28.5	28.5	37.732	0	13.903	916780000	37	9	9	9	1	7	6	6	8	7	6	7	6	6	8	7	6	7	6	6	8	7	6	323	323	1	45	NaN	NaN	NaN	NaN
Q7UZT6	Molybdopterin biosynthesis protein	Central Metabolism	0.00780909	0.00812931	24.9965	25.0815	-0.0849692	0.447154	2	2	2	9.1	9.1	9.1	31.031	0	5.1531	155720000	7	2	2	2	1	1	2	2	2	2	2	1	2	2	2	2	2	1	2	2	2	2	2	274	274	1	11	NaN	NaN	NaN	NaN
Q7UZT7	Uncharacterized protein	Uncharacterized	0.191245	0.240103	27.949	28.3036	-0.354618	0.260345	12	12	12	32.9	32.9	32.9	42.68	0	73.275	1022600000	55	12	12	12	1	9	11	10	10	11	9	9	11	10	10	11	9	9	11	10	10	11	9	386	386	1	63	NaN	NaN	NaN	NaN
Q7UZT9	Uncharacterized protein	Uncharacterized	0.00195735	0.00166578	23.2672	23.1725	0.0946604	0.951592	17	17	17	41.6	41.6	41.6	42.971	0	120.87	1789500000	117	17	17	17	1	14	15	14	15	14	15	14	15	14	15	14	15	14	15	14	15	14	15	382	382	1	119	NaN	NaN	NaN	NaN
Q7UZU0	Prephenate dehydrogenase	Central Metabolism	0.0185198	0.0172584	25.7888	25.715	0.0738055	0.553992	4	4	4	47.9	47.9	47.9	13.35	0	36.522	4064100000	66	4	4	4	1	3	4	3	3	3	3	3	4	3	3	3	3	3	4	3	3	3	3	121	121	1	56	NaN	NaN	NaN	NaN
Q7UZU3	Protein RecA	Basic Cellular Processes	0.1151	0.108121	28.8313	28.7699	0.0613639	0.472828	9	9	9	22.6	22.6	22.6	56.225	0	13.703	103160000	23	9	9	9	1	3	4	6	4	2	4	3	4	6	4	2	4	3	4	6	4	2	4	501	501	1	25	NaN	NaN	NaN	NaN
Q7UZU4	Uncharacterized protein	Uncharacterized	0.0126088	0.0121535	25.1173	25.0961	0.0212307	0.943236	13	13	13	66.3	66.3	66.3	30.342	0	130.48	2000800000	57	13	13	13	1	13	11	11	9	10	9	13	11	11	9	10	9	13	11	11	9	10	9	279	279	1	76	NaN	NaN	NaN	NaN
Q7UZU6	NAD(P)H-quinone oxidoreductase subunit N	Energy Production and Conversion	0.0479369	0.0531383	26.3202	26.4995	-0.179342	0.259966	21	21	21	62.4	62.4	62.4	40.164	0	323.31	18280000000	214	21	21	21	1	20	21	20	19	20	20	20	21	20	19	20	20	20	21	20	19	20	20	370	370	1	216	NaN	NaN	NaN	NaN
Q7UZU7	50S ribosomal protein L3	Basic Cellular Processes	0.0646633	0.0665077	27.23	27.2967	-0.0667	0.742682	9	9	9	28.3	28.3	28.3	30.667	0	26.131	802770000	33	9	9	9	1	8	7	7	6	8	6	8	7	7	6	8	6	8	7	7	6	8	6	258	258	1	47	NaN	NaN	NaN	NaN
Q7UZU8	50S ribosomal protein L4	Basic Cellular Processes	0.447435	0.455124	29.9737	30.0268	-0.053112	0.454449	6	6	6	44.9	44.9	44.9	17.661	0	9.7189	1147000000	36	6	6	6	1	5	5	5	5	6	5	5	5	5	5	6	5	5	5	5	5	6	5	156	156	1	38	NaN	NaN	NaN	NaN
Q7UZU9	50S ribosomal protein L23	Basic Cellular Processes	0.144103	0.158005	27.2689	27.4296	-0.160753	0.221067	16	16	16	58.5	58.5	58.5	23.168	0	126.88	5896900000	130	16	16	16	1	14	15	16	14	15	15	14	15	16	14	15	15	14	15	16	14	15	15	217	217	1	118	NaN	NaN	NaN	NaN
Q7UZV0	50S ribosomal protein L2	Basic Cellular Processes	0.0895454	0.101272	28.0989	28.3082	-0.209384	0.431338	16	16	16	61.9	61.9	61.9	23.168	0	90.786	18433000000	138	16	16	16	1	12	13	13	14	15	15	12	13	13	14	15	15	12	13	13	14	15	15	210	210	1	142	NaN	NaN	NaN	NaN
Q7UZV1	50S ribosomal protein L22	Basic Cellular Processes	0.0507849	0.0537363	26.1098	26.2298	-0.120033	0.726188	6	6	6	59	59	59	11.349	0	35.448	3044700000	51	6	6	6	1	6	6	5	6	6	5	6	6	5	6	6	5	6	6	5	6	6	5	100	100	1	56	NaN	NaN	NaN	NaN
Q7UZV2	30S ribosomal protein S3	Basic Cellular Processes	0.0864982	0.0909584	27.8137	27.9134	-0.0997772	0.368297	16	16	16	52.6	52.6	52.6	31.755	0	102.35	8817500000	140	16	16	16	1	14	16	14	15	15	16	14	16	14	15	15	16	14	16	14	15	15	16	287	287	1	146	NaN	NaN	NaN	NaN
Q7UZV3	50S ribosomal protein L16	Basic Cellular Processes	0.122634	0.143787	27.7136	27.9719	-0.258294	0.152	7	7	7	66.4	66.4	66.4	14.135	0	36.424	1590700000	55	7	7	7	1	4	6	5	6	4	6	4	6	5	6	4	6	4	6	5	6	4	6	128	128	1	50	NaN	NaN	NaN	NaN
Q7UZV4	50S ribosomal protein L29	Basic Cellular Processes	0.0732907	0.0811429	25.8198	25.9938	-0.174045	0.233649	23	23	23	69.5	69.5	69.5	27.466	0	150.08	17612000000	194	23	23	23	1	20	21	20	21	22	23	20	21	20	21	22	23	20	21	20	21	22	23	243	243	1	190	NaN	NaN	NaN	NaN
Q7UZV5	50S ribosomal protein L24	Basic Cellular Processes	0.039643	0.0415007	25.646	25.7375	-0.0914415	0.52969	7	7	7	52.5	52.5	52.5	17.98	0	87.959	4967100000	113	7	7	7	1	6	5	5	6	6	5	6	5	5	6	6	5	6	5	5	6	6	5	160	160	1	101	NaN	NaN	NaN	NaN
Q7UZV6	50S ribosomal protein L5	Basic Cellular Processes	0.137526	0.149523	28.0327	28.1814	-0.148664	0.371324	8	8	8	61.1	61.1	61.1	8.4367	0	73.764	1823300000	58	8	8	8	1	7	8	8	7	8	8	7	8	8	7	8	8	7	8	8	7	8	8	72	72	1	74	NaN	NaN	NaN	NaN
Q7UZV7	30S ribosomal protein S8	Basic Cellular Processes	0.120171	0.127273	27.4186	27.5277	-0.109175	0.434428	6	6	6	38.1	38.1	38.1	13.479	0	20.453	2137500000	50	6	6	6	1	6	6	6	6	6	6	6	6	6	6	6	6	6	6	6	6	6	6	118	118	1	60	NaN	NaN	NaN	NaN
Q7UZV8	50S ribosomal protein L6	Basic Cellular Processes	0.155574	0.167173	28.2183	28.3512	-0.132886	0.223797	10	10	10	59	59	59	19.732	0	76.693	5845100000	105	10	10	10	1	8	9	9	9	9	9	8	9	9	9	9	9	8	9	9	9	9	9	178	178	1	104	NaN	NaN	NaN	NaN
Q7UZV9	50S ribosomal protein L18	Basic Cellular Processes	0.0366308	0.035828	25.5784	25.576	0.00240262	0.993962	7	7	7	47.4	47.4	47.4	14.502	0	60.825	4843600000	96	7	7	7	1	7	7	7	7	6	7	7	7	7	7	6	7	7	7	7	7	6	7	133	133	1	83	NaN	NaN	NaN	NaN
Q7UZW0	30S ribosomal protein S5	Basic Cellular Processes	0.161614	0.17796	28.4771	28.644	-0.166896	0.191822	16	16	16	69.3	69.3	69.3	19.63	0	148.17	12548000000	206	16	16	16	1	15	15	16	15	16	15	15	15	16	15	16	15	15	15	16	15	16	15	179	179	1	202	NaN	NaN	NaN	NaN
Q7UZW1	50S ribosomal protein L15	Basic Cellular Processes	0.0530143	0.0587909	26.4292	26.6078	-0.178537	0.291832	7	7	7	46.7	46.7	46.7	13.66	0	14.032	753510000	26	7	7	7	1	4	4	5	5	6	6	4	4	5	5	6	6	4	4	5	5	6	6	122	122	1	42	NaN	NaN	NaN	NaN
Q7UZW2	Protein translocase subunit SecY	Basic Cellular Processes	0.0205002	0.0197671	26.5888	26.5655	0.0232773	0.810196	16	16	16	69.9	69.9	69.9	22.204	0	101.53	12708000000	138	16	16	16	1	13	14	15	15	15	16	13	14	15	15	15	16	13	14	15	15	15	16	206	206	1	151	NaN	NaN	NaN	NaN
Q7UZW3	Adenylate kinase	Energy Production and Conversion	0.0277946	0.0225831	25.7688	25.4995	0.269328	0.354415	12	12	12	71.1	71.1	71.1	16.757	0	121.2	4463500000	92	12	12	12	1	12	11	12	12	12	12	12	11	12	12	12	12	12	11	12	12	12	12	152	152	1	132	NaN	NaN	NaN	NaN
Q7UZW4	30S ribosomal protein S13	Basic Cellular Processes	0.120065	0.123422	27.2779	27.3472	-0.0692558	0.687875	12	12	12	23	23	23	46.856	0	76.06	3569400000	83	12	12	12	1	11	11	12	11	11	11	11	11	12	11	11	11	11	11	12	11	11	11	439	439	1	96	NaN	NaN	NaN	NaN
Q7UZW5	30S ribosomal protein S11	Basic Cellular Processes	0.106806	0.120521	27.2145	27.4166	-0.202111	0.226293	10	10	10	48.4	48.4	48.4	20.843	0	73.259	1470900000	65	10	10	10	1	9	9	10	9	10	8	9	9	10	9	10	8	9	9	10	9	10	8	184	184	1	81	NaN	NaN	NaN	NaN
Q7UZW6	DNA-directed RNA polymerase subunit alpha	Basic Cellular Processes	0.189367	0.190704	29.3042	29.3429	-0.0387255	0.759597	8	8	8	47.9	47.9	47.9	13.705	0	83.128	4646200000	70	8	8	8	1	8	7	7	8	8	8	8	7	7	8	8	8	8	7	7	8	8	8	121	121	1	77	NaN	NaN	NaN	NaN
Q7UZW7	50S ribosomal protein L17	Basic Cellular Processes	0.148442	0.14495	27.5219	27.5193	0.00266902	0.998286	6	6	6	28.5	28.5	28.5	13.766	0	133.29	4008100000	60	6	6	6	1	6	6	6	6	6	6	6	6	6	6	6	6	6	6	6	6	6	6	130	130	1	58	NaN	NaN	NaN	NaN
Q7UZW8	50S ribosomal protein L13	Basic Cellular Processes	0.132934	0.140316	27.6686	27.7744	-0.105745	0.292	26	26	26	67	67	67	34.281	0	323.31	52348000000	453	26	26	26	1	26	26	25	25	25	25	26	26	25	25	25	25	26	26	25	25	25	25	312	312	1	416	NaN	NaN	NaN	NaN
Q7UZW9	30S ribosomal protein S9	Basic Cellular Processes	0.0535749	0.0612755	26.2852	26.5071	-0.221869	0.122333	7	7	7	43.1	43.1	43.1	13.273	0	15.997	4165600000	59	7	7	7	1	7	7	7	7	6	7	7	7	7	7	6	7	7	7	7	7	6	7	116	116	1	68	NaN	NaN	NaN	NaN
Q7UZX0	50S ribosomal protein L31	Basic Cellular Processes	0.013839	0.0150234	23.5309	23.7378	-0.206903	0.926276	10	10	10	54.5	54.5	54.5	16.112	0	23.983	5701100000	72	10	10	10	1	8	9	9	10	9	10	8	9	9	10	9	10	8	9	9	10	9	10	143	143	1	79	NaN	NaN	NaN	NaN
Q7UZX1	Peptide chain release factor 1	Basic Cellular Processes	0.0143323	0.011638	25.8034	25.53	0.273382	0.147778	5	5	5	34.6	34.6	34.6	14.924	0	22.468	1439900000	39	5	5	5	1	5	5	5	5	5	5	5	5	5	5	5	5	5	5	5	5	5	5	136	136	1	49	NaN	NaN	NaN	NaN
Q7UZX2	HNH endonuclease family protein	Basic Cellular Processes	0.00729523	0.00798687	23.7093	23.8678	-0.158522	0.488549	2	2	2	26.7	26.7	26.7	9.6338	0	16.461	132840000	3	2	2	2	1	2	2	2	1	1	2	2	2	2	1	1	2	2	2	2	1	1	2	86	86	1	10	NaN	NaN	NaN	NaN
Q7UZX3	Putative imidazoleglycerol-phosphate dehydratase	Central Metabolism	0.0169818	0.0165305	25.5944	25.59	0.00442632	0.99571	23	23	23	60.4	60.4	60.4	40.966	0	102.49	1914200000	94	23	23	23	1	16	17	16	16	17	14	16	17	16	16	17	14	16	17	16	16	17	14	364	364	1	115	NaN	NaN	NaN	NaN
Q7UZX4	Glycosyl transferase, family 2	Central Metabolism	0.020668	0.0178148	26.1398	25.9589	0.180907	0.369121	6	6	6	50	50	50	19.23	0	8.9421	231890000	16	6	6	6	1	4	4	4	2	5	5	4	4	4	2	5	5	4	4	4	2	5	5	168	168	1	30	NaN	NaN	NaN	NaN
Q7UZX6	Photosystem I reaction center subunit XI	Photosynthesis	0.214555	0.201493	28.8292	28.7695	0.0597464	0.877595	6	6	6	40.1	40.1	40.1	30.136	0	24.296	1169600000	35	6	6	6	1	4	4	6	4	5	6	4	4	6	4	5	6	4	4	6	4	5	6	267	267	1	44	NaN	NaN	NaN	NaN
Q7UZX7	Conserved hypothetical protein	Uncharacterized	0.0142823	0.0141085	25.26	25.2716	-0.0116215	0.957363	9	9	9	20.9	20.9	20.9	36.129	0	15.662	1868000000	52	9	9	9	1	9	8	9	9	9	9	9	8	9	9	9	9	9	8	9	9	9	9	320	320	1	78	NaN	NaN	NaN	NaN
Q7UZX8	Uncharacterized protein	Uncharacterized	0.0069815	0.00770137	24.4811	24.6443	-0.163212	0.484268	7	7	7	58.8	58.8	58.8	21.408	0	62.076	15652000000	124	7	7	7	1	6	6	7	7	7	6	6	6	7	7	7	6	6	6	7	7	7	6	199	199	1	96	NaN	NaN	NaN	NaN
Q7UZY0	Site-specific recombinase	Basic Cellular Processes	0.00460866	0.00459139	23.4842	23.5114	-0.0271943	0.945956	7	7	7	29.1	29.1	29.1	29.476	0	55.577	798320000	35	7	7	7	1	6	6	7	6	6	7	6	6	7	6	6	7	6	6	7	6	6	7	251	251	1	39	NaN	NaN	NaN	NaN
Q7UZY1	Lipoyl synthase 1	Oxidative Stress	0.00297121	0.00362152	23.2373	23.5328	-0.295497	0.471235	8	8	8	24.7	24.7	24.7	34.494	0	19.172	568370000	47	8	8	8	1	7	7	6	7	7	7	7	7	6	7	7	7	7	7	6	7	7	7	299	299	1	54	NaN	NaN	NaN	NaN
Q7UZY3	Ferredoxin-dependent glutamate synthase, Fd-GOGAT	Inorganic Nutrient Processing	0.00925351	0.0089163	27.2347	27.2087	0.0259476	0.821142	2	2	2	11	11	11	26.296	0	3.9707	133730000	14	2	2	2	1	2	2	2	1	2	2	2	2	2	1	2	2	2	2	2	1	2	2	228	228	1	14	NaN	NaN	NaN	NaN
Q7UZY4	30S ribosomal protein S12	Basic Cellular Processes	0.173637	0.218809	27.8583	28.2177	-0.359359	0.221579	6	6	6	29.3	29.3	29.3	33.661	0	17.529	162410000	23	6	6	6	1	4	5	4	4	5	5	4	5	4	4	5	5	4	5	4	4	5	5	297	297	1	30	NaN	NaN	NaN	NaN
Q7UZY5	30S ribosomal protein S7	Basic Cellular Processes	0.240144	0.261132	28.6456	28.7962	-0.150671	0.399625	79	79	79	53.8	53.8	53.8	168.15	0	323.31	21876000000	592	79	79	79	1	66	70	69	69	70	71	66	70	69	69	70	71	66	70	69	69	70	71	1521	1521	1	653	NaN	NaN	NaN	NaN
Q7UZY6	Elongation factor G	Basic Cellular Processes	0.148643	0.141907	30.1025	30.0635	0.0390021	0.605102	4	4	4	24	24	24	13.893	0	26.176	2750700000	23	4	4	4	1	4	4	4	4	4	4	4	4	4	4	4	4	4	4	4	4	4	4	125	125	1	27	NaN	NaN	NaN	NaN
Q7UZY7	Elongation factor Tu	Basic Cellular Processes	1.48339	1.40995	32.6283	32.5837	0.0446091	0.78028	11	11	11	64.7	64.7	64.7	17.357	0	95.14	13347000000	147	11	11	11	1	10	10	10	10	10	11	10	10	10	10	10	11	10	10	10	10	10	11	156	156	1	146	NaN	NaN	NaN	NaN
Q7UZY8	30S ribosomal protein S10	Basic Cellular Processes	0.129424	0.12723	27.1981	27.2011	-0.00302442	0.982807	54	54	54	81.6	81.6	81.6	75.689	0	323.31	95030000000	885	54	54	54	1	50	51	51	50	50	51	50	51	51	50	50	51	50	51	51	50	50	51	691	691	1	819	NaN	NaN	NaN	NaN
Q7UZY9	ATP-dependent protease La (LON) domain	Basic Cellular Processes	0.016039	0.0180937	25.2247	25.4169	-0.192234	0.521227	46	46	46	94.2	94.2	94.2	43.621	0	323.31	287910000000	1467	46	46	46	1	41	43	45	44	44	44	41	43	45	44	44	44	41	43	45	44	44	44	399	399	1	1450	NaN	NaN	NaN	NaN
Q7UZZ0	SAM (And some other nucleotide) binding motif	Basic Cellular Processes	0.019517	0.0206831	26.0195	26.133	-0.113528	0.533354	12	12	12	71.7	71.7	71.7	12.046	0	87.192	4008200000	79	12	12	12	1	8	9	9	9	11	8	8	9	9	9	11	8	8	9	9	9	11	8	106	106	1	76	NaN	NaN	NaN	NaN
Q7UZZ1	Uncharacterized protein	Uncharacterized	0.0144942	0.0143995	24.7367	24.7527	-0.0160071	0.961122	5	5	5	27.1	27.1	27.1	24.903	0	12.534	1027400000	27	5	5	5	1	5	4	4	4	5	4	5	4	4	4	5	4	5	4	4	4	5	4	218	218	1	42	NaN	NaN	NaN	NaN
Q7UZZ3	LL-diaminopimelate aminotransferase	Central Metabolism	0.0435795	0.0398263	27.571	27.4693	0.101667	0.450823	17	17	17	54.7	54.7	54.7	35.457	0	60.499	2418300000	95	17	17	17	1	13	13	16	14	16	13	13	13	16	14	16	13	13	13	16	14	16	13	311	311	1	112	NaN	NaN	NaN	NaN
Q7UZZ5	Uncharacterized protein	Uncharacterized	0.00756214	0.00795609	25.4413	25.5479	-0.106648	0.725061	11	11	11	73.8	73.8	73.8	19.051	0	22.471	1036100000	55	11	11	11	1	10	10	9	10	8	9	10	10	9	10	8	9	10	10	9	10	8	9	172	172	1	68	NaN	NaN	NaN	NaN
Q7UZZ6	Glycosyl transferase, family 2	Central Metabolism	0.0181497	0.0188222	26.1366	26.2193	-0.0827745	0.662538	32	32	32	73.8	73.8	73.8	45.575	0	156.61	9907600000	219	32	32	32	1	28	30	27	28	27	28	28	30	27	28	27	28	28	30	27	28	27	28	408	408	1	248	NaN	NaN	NaN	NaN
Q7UZZ7	Dolichyl-phosphate-mannose-protein mannosyltransferase	Central Metabolism	0.00314837	0.00300557	24.1164	24.0774	0.0389881	0.812583	19	19	19	36.4	36.4	36.4	61.732	0	88.714	2002700000	82	19	19	19	1	13	18	17	16	16	16	13	18	17	16	16	16	13	18	17	16	16	16	539	539	1	122	NaN	NaN	NaN	NaN
Q7UZZ9	Translation initiation factor IF-2	Basic Cellular Processes	0.0259578	0.0267233	28.3426	28.4129	-0.0703761	0.540645	12	12	12	37.2	37.2	37.2	42.266	0	41.959	1368100000	55	12	12	12	1	8	10	7	8	8	10	8	10	7	8	8	10	8	10	7	8	8	10	363	363	1	68	NaN	NaN	NaN	NaN
Q7V001	Transcription termination/antitermination protein NusA	Basic Cellular Processes	0.147254	0.146976	29.5233	29.549	-0.025739	0.745059	3	3	3	7.4	7.4	7.4	59.882	0	12.48	176470000	14	3	3	3	1	3	3	2	3	3	3	3	3	2	3	3	3	3	3	2	3	3	3	515	515	1	20	NaN	NaN	NaN	NaN
Q7V002	Ribosome maturation factor RimP	Basic Cellular Processes	0.0143519	0.0138441	24.5673	24.5497	0.0175934	0.957079	74	74	74	67.9	67.9	67.9	127.15	0	323.31	35402000000	655	74	74	74	1	67	65	67	66	65	69	67	65	67	66	65	69	67	65	67	66	65	69	1169	1169	1	709	NaN	NaN	NaN	NaN
Q7V003	Ribose-5-phosphate isomerase A	Carbon Fixation	0.130835	0.121683	28.3375	28.2593	0.0781981	0.502554	38	38	38	80.5	80.5	80.5	52.999	0	323.31	42350000000	495	38	38	38	1	33	33	35	35	34	35	33	33	35	35	34	35	33	33	35	35	34	35	467	467	1	458	NaN	NaN	NaN	NaN
Q7V004	Histidinol dehydrogenase	Central Metabolism	0.0567575	0.0519016	28.018	27.9214	0.0965818	0.539897	4	4	4	18.1	18.1	18.1	17.577	0	4.7545	353090000	18	4	4	4	1	3	3	3	3	4	3	3	3	3	3	4	3	3	3	3	3	4	3	155	155	1	19	NaN	NaN	NaN	NaN
Q7V005	D-aminoacyl-tRNA deacylase	Basic Cellular Processes	0.0424629	0.04221	26.9026	26.9191	-0.0164483	0.971993	12	12	12	62.3	62.3	62.3	24.881	0	256.72	11987000000	140	12	12	12	1	11	10	11	12	10	12	11	10	11	12	10	12	11	10	11	12	10	12	231	231	1	143	NaN	NaN	NaN	NaN
Q7V006	DNA-directed RNA polymerase subunit beta	Basic Cellular Processes	0.0894764	0.0893583	30.0369	30.0628	-0.0258738	0.731437	30	30	30	74.5	74.5	74.5	47.021	0	239.67	12016000000	214	30	30	30	1	28	28	28	29	29	28	28	28	28	29	29	28	28	28	28	29	29	28	428	428	1	253	NaN	NaN	NaN	NaN
Q7V007	DNA-directed RNA polymerase subunit gamma	Basic Cellular Processes	0.155991	0.153453	30.0477	30.0523	-0.00456111	0.97806	6	6	6	24.2	24.2	24.2	29.968	0	38.6	1866900000	20	6	6	6	1	6	6	6	6	6	4	6	6	6	6	6	4	6	6	6	6	6	4	264	264	1	35	NaN	NaN	NaN	NaN
Q7V008	DNA-directed RNA polymerase subunit beta	Basic Cellular Processes	0.112808	0.113488	30.6853	30.7244	-0.0390352	0.78747	93	93	93	78.9	78.9	78.9	122.91	0	323.31	136560000000	1281	93	93	93	1	89	90	89	88	90	93	89	90	89	88	90	93	89	90	89	88	90	93	1097	1097	1	1211	NaN	NaN	NaN	NaN
Q7V009	Possible high light inducible protein	Photosynthesis	0.0378699	0.0400867	24.3393	24.4505	-0.111244	0.476044	46	46	46	81.1	81.1	81.1	72.379	0	323.31	71088000000	597	46	46	46	1	41	43	43	42	45	44	41	43	43	42	45	44	41	43	43	42	45	44	634	634	1	610	NaN	NaN	NaN	NaN
Q7V010	Probable dual-specificity RNA methyltransferase RlmN	Basic Cellular Processes	0.0039048	0.0038728	23.8614	23.8759	-0.0145105	0.957369	101	101	101	75.5	75.5	75.5	149.64	0	323.31	144700000000	1475	101	101	101	1	94	96	96	97	97	97	94	96	96	97	97	97	94	96	96	97	97	97	1366	1366	1	1377	NaN	NaN	NaN	NaN
Q7V011	Uncharacterized protein	Uncharacterized	0.0293842	0.0289281	26.3311	26.3362	-0.00515048	0.967242	2	2	2	34	34	34	5.9442	0.0007728	3.0402	297350000	14	2	2	2	1	2	2	2	2	2	2	2	2	2	2	2	2	2	2	2	2	2	2	50	50	1	20	NaN	NaN	NaN	NaN
Q7V013	Uncharacterized protein	Uncharacterized	0.0143685	0.0146357	24.3182	24.374	-0.0558147	0.789913	8	8	8	24.4	24.4	24.4	39.663	0	15.588	310260000	22	8	8	8	1	2	6	4	6	4	6	2	6	4	6	4	6	2	6	4	6	4	6	348	348	1	28	NaN	NaN	NaN	NaN
Q7V016	Ribosomal RNA small subunit methyltransferase G	Basic Cellular Processes	0.00537244	0.00599502	23.7797	23.9669	-0.187176	0.197043	14	14	14	61.3	61.3	61.3	28.884	0	114.85	2647500000	85	14	14	14	1	11	12	13	12	12	12	11	12	13	12	12	12	11	12	13	12	12	12	256	256	1	92	NaN	NaN	NaN	NaN
Q7V019	Putative diaminopelargonic acid synthase	Central Metabolism	0.0278545	0.0266568	27.0106	26.9769	0.033659	0.76116	11	11	11	86.2	86.2	86.2	15.117	0	62.067	694590000	44	11	11	11	1	11	9	9	9	8	10	11	9	9	9	8	10	11	9	9	9	8	10	130	130	1	62	NaN	NaN	NaN	NaN
Q7V020	Uncharacterized protein	Uncharacterized	0.00293222	0.00386401	22.9735	23.4027	-0.429151	0.324346	7	7	7	31.8	31.8	31.8	27.422	0	15.891	356780000	37	7	7	7	1	6	7	6	5	7	6	6	7	6	5	7	6	6	7	6	5	7	6	239	239	1	42	NaN	NaN	NaN	NaN
Q7V022	Putative 8-amino-7-oxononanoate synthase	Central Metabolism	0.0106988	0.0111199	25.4402	25.531	-0.0908222	0.720867	16	16	16	49.9	49.9	49.9	48.708	0	155.63	5530200000	129	16	16	16	1	15	16	15	15	15	15	15	16	15	15	15	15	15	16	15	15	15	15	433	433	1	141	NaN	NaN	NaN	NaN
Q7V023	Putative DNA helicase	Basic Cellular Processes	0.00439977	0.00435533	25.4169	25.4315	-0.014583	0.945812	3	3	3	16.3	16.3	16.3	29.37	0	22.477	116240000	20	3	3	3	1	3	3	3	3	2	3	3	3	3	3	2	3	3	3	3	3	2	3	252	252	1	21	NaN	NaN	NaN	NaN
Q7V024	Fumarate hydratase class II	Central Metabolism	0.0503318	0.0492349	27.9564	27.9526	0.00375811	0.962711	11	11	11	38.6	38.6	38.6	42.118	0	60.902	1001300000	56	11	11	11	1	5	7	7	4	8	9	5	7	7	4	8	9	5	7	7	4	8	9	381	381	1	51	NaN	NaN	NaN	NaN
Q7V025	Nitrogen regulatory protein P-II	Inorganic Nutrient Processing	0.251779	0.229971	28.2369	28.1351	0.101819	0.207769	31	31	31	35.2	35.2	35.2	103.14	0	212.43	2788700000	137	31	31	31	1	26	29	29	26	27	29	26	29	29	26	27	29	26	29	29	26	27	29	908	908	1	191	NaN	NaN	NaN	NaN
Q7V027	NADPH-dependent 7-cyano-7-deazaguanine reductase	Central Metabolism	0.0260262	0.0279972	25.2427	25.3736	-0.13086	0.539195	25	25	25	58.1	58.1	58.1	50.623	0	193.86	10576000000	182	25	25	25	1	23	24	23	23	24	23	23	24	23	23	24	23	23	24	23	23	24	23	461	461	1	224	NaN	NaN	NaN	NaN
Q7V028	Cytochrome c biogenesis protein CcsB	Photosynthesis	0.00104433	0.00182317	22.2502	22.9886	-0.738452	0.448954	12	12	12	88.4	88.4	88.4	12.314	0	71.053	9259800000	137	12	12	12	1	12	12	12	12	12	12	12	12	12	12	12	12	12	12	12	12	12	12	112	112	1	151	NaN	NaN	NaN	NaN
Q7V032	ATP synthase subunit a	Energy Production and Conversion	0.0137914	0.0276804	25.1472	25.974	-0.826826	0.531911	12	12	12	84.6	84.6	84.6	15.957	0	149.78	2050800000	84	12	12	12	1	11	11	11	10	11	12	11	11	11	10	11	12	11	11	11	10	11	12	136	136	1	110	NaN	NaN	NaN	NaN
Q7V033	ATP synthase subunit c	Energy Production and Conversion	0.220246	0.228633	27.5694	27.6562	-0.0868568	0.784375	4	4	4	9.8	9.8	9.8	49.046	0.0007837	3.6609	55342000	11	4	4	4	1	3	3	2	2	2	4	3	3	2	2	2	4	3	3	2	2	2	4	428	428	1	16	NaN	NaN	NaN	NaN
Q7V034	ATP synthase subunit b	Energy Production and Conversion	0.0518238	0.0578899	26.4049	26.5939	-0.189069	0.354713	2	2	2	12.4	12.4	12.4	27.278	0	11.319	633040000	19	2	2	2	1	2	2	2	1	2	2	2	2	2	1	2	2	2	2	2	1	2	2	241	241	1	21	NaN	NaN	NaN	NaN
Q7V035	ATP synthase subunit b	Energy Production and Conversion	0.0506344	0.0535457	26.5239	26.6336	-0.109699	0.552117	1	1	1	50.6	50.6	50.6	8.0182	0	34.693	2553100000	41	1	1	1	1	1	1	1	1	1	1	1	1	1	1	1	1	1	1	1	1	1	1	81	81	1	37	NaN	NaN	NaN	NaN
Q7V036	ATP synthase subunit delta	Energy Production and Conversion	0.0769249	0.0851616	27.2108	27.3848	-0.174061	0.353244	10	10	10	49.7	49.7	49.7	17.146	0	272.04	3563600000	87	10	10	10	1	9	10	9	9	9	10	9	10	9	9	9	10	9	10	9	9	9	10	153	153	1	103	NaN	NaN	NaN	NaN
Q7V037	ATP synthase subunit alpha	Energy Production and Conversion	0.302832	0.297129	30.6764	30.6773	-0.000933329	1	13	13	13	56.5	56.5	56.5	19.048	0	115.62	2829900000	72	13	13	13	1	12	13	11	13	10	12	12	13	11	13	10	12	12	13	11	13	10	12	170	170	1	83	NaN	NaN	NaN	NaN
Q7V038	ATP synthase gamma chain	Energy Production and Conversion	0.0647857	0.0640821	27.7728	27.7879	-0.0151869	0.946411	17	17	17	95	95	95	19.726	0	148.63	7820800000	126	17	17	17	1	14	14	12	14	14	15	14	14	12	14	14	15	14	14	12	14	14	15	180	180	1	140	NaN	NaN	NaN	NaN
Q7V041	Uncharacterized protein	Uncharacterized	0.00944637	0.00815243	25.1525	24.9683	0.184212	0.292779	39	39	39	57.6	57.6	57.6	54.34	0	323.31	95562000000	631	39	39	39	1	34	35	36	37	37	38	34	35	36	37	37	38	34	35	36	37	37	38	505	505	1	598	NaN	NaN	NaN	NaN
Q7V042	Glutamine-dependent NAD(+) synthetase	Central Metabolism	0.016999	0.0163586	26.6825	26.6541	0.0284138	0.893043	24	24	24	80.1	80.1	80.1	35.33	0	171.27	10514000000	163	24	24	24	1	23	23	22	23	20	22	23	23	22	23	20	22	23	23	22	23	20	22	316	316	1	184	NaN	NaN	NaN	NaN
Q7V043	Nicotinate-nucleotide adenylyltransferase	Central Metabolism	0.00582711	0.00642409	23.5819	23.6502	-0.0682723	0.963499	6	6	6	28.4	28.4	28.4	37.717	0	37.436	973470000	35	6	6	6	1	4	6	6	6	6	6	4	6	6	6	6	6	4	6	6	6	6	6	352	352	1	59	NaN	NaN	NaN	NaN
Q7V045	Uncharacterized protein	Uncharacterized	0.0624116	0.0550396	27.7613	27.6083	0.152999	0.233577	28	28	28	57.3	57.3	57.3	63.319	0	206.97	5607700000	198	28	28	28	1	25	26	23	22	22	22	25	26	23	22	22	22	25	26	23	22	22	22	565	565	1	197	NaN	NaN	NaN	NaN
Q7V046	Putative aminopeptidase P	Basic Cellular Processes	0.028486	0.0260892	27.0688	26.9724	0.0963421	0.380746	2	2	2	15	15	15	22.264	0	7.6375	107480000	8	2	2	2	1	2	2	1	1	2	1	2	2	1	1	2	1	2	2	1	1	2	1	193	193	1	10	NaN	NaN	NaN	NaN
Q7V048	Probable 30S ribosomal protein PSRP-3	Basic Cellular Processes	0.0513977	0.0545695	26.1097	26.2201	-0.110475	0.808901	12	12	12	38.8	38.8	38.8	35.76	0	45.868	5107000000	78	12	12	12	1	10	11	10	9	9	11	10	11	10	9	9	11	10	11	10	9	9	11	325	325	1	88	NaN	NaN	NaN	NaN
Q7V049	ATP synthase subunit beta	Energy Production and Conversion	0.466204	0.426995	31.244	31.1453	0.0986703	0.237263	23	23	23	58.3	58.3	58.3	49.996	0	130.62	6657000000	156	23	23	23	1	22	20	22	20	19	21	22	20	22	20	19	21	22	20	22	20	19	21	441	441	1	168	NaN	NaN	NaN	NaN
Q7V051	2,3-bisphosphoglycerate-independent phosphoglycerate mutase	Central Metabolism	0.0210979	0.0193986	26.9177	26.8367	0.0810089	0.808276	6	6	6	43.7	43.7	43.7	14.106	0	52.731	1749900000	46	6	6	6	1	5	6	5	6	5	5	5	6	5	6	5	5	5	6	5	6	5	5	126	126	1	45	NaN	NaN	NaN	NaN
Q7V052	Bifunctional protein PyrR	Central Metabolism	0.111924	0.117035	27.7513	27.8434	-0.0921694	0.502838	36	36	36	89.1	89.1	89.1	51.98	0	323.31	122830000000	791	36	36	36	1	34	33	34	35	32	35	34	33	34	35	32	35	34	33	34	35	32	35	486	486	1	716	NaN	NaN	NaN	NaN
Q7V053	Putative DnaK-type molecular chaperone (HSP70 family)	Basic Cellular Processes	0.00278793	0.00289528	23.9506	24.0292	-0.0786603	0.88056	25	25	25	49.8	49.8	49.8	60.147	0	164.25	4623600000	166	25	25	25	1	23	23	20	21	22	19	23	23	20	21	22	19	23	23	20	21	22	19	540	540	1	197	NaN	NaN	NaN	NaN
Q7V054	DNA-directed RNA polymerase subunit omega	Basic Cellular Processes	0.276548	0.296317	27.8507	27.9762	-0.125481	0.383109	19	19	19	76.1	76.1	76.1	20.576	0	120.46	6390500000	111	19	19	19	1	17	19	16	18	17	17	17	19	16	18	17	17	17	19	16	18	17	17	180	180	1	131	NaN	NaN	NaN	NaN
Q7V057	Uncharacterized protein	Uncharacterized	0.0502613	0.0506598	26.3623	26.3995	-0.0372639	0.870352	9	9	9	21.5	21.5	21.5	58.708	0	20.103	263660000	20	9	9	9	1	7	5	9	4	6	8	7	5	9	4	6	8	7	5	9	4	6	8	521	521	1	43	NaN	NaN	NaN	NaN
Q7V060	Serine proteases, trypsin family:HtrA/DegQ protease family	Basic Cellular Processes	0.0246859	0.0238032	26.877	26.8561	0.0209268	0.928181	7	7	7	76.9	76.9	76.9	8.9759	0	43.118	5239900000	77	7	7	7	1	6	7	6	6	7	6	6	7	6	6	7	6	6	7	6	6	7	6	78	78	1	79	NaN	NaN	NaN	NaN
Q7V061	Possible Uncharacterized protein family UPF003	Uncharacterized	0.021167	0.0358426	24.0204	24.7753	-0.754961	0.687726	10	10	10	41.8	41.8	41.8	18.075	0	35.554	2501200000	59	10	10	10	1	8	8	8	8	9	8	8	8	8	8	9	8	8	8	8	8	9	8	153	153	1	70	NaN	NaN	NaN	NaN
Q7V064	Possible ATP synthase B/B CF(0)	Other	0.156256	0.147864	27.8074	27.7548	0.0526638	0.743439	14	14	14	43.9	43.9	43.9	49.039	0	62.807	2861500000	70	14	14	14	1	11	13	11	11	9	9	11	13	11	11	9	9	11	13	11	11	9	9	446	446	1	84	NaN	NaN	NaN	NaN
Q7V066	Conserved hypothetical	Uncharacterized	0.00972638	0.00931597	26.1749	26.1395	0.0354328	0.789337	3	3	3	37.5	37.5	37.5	9.239	0.0037736	2.406	199280000	4	3	3	3	1	1	2	1	2	3	1	1	2	1	2	3	1	1	2	1	2	3	1	80	80	1	10	NaN	NaN	NaN	NaN
Q7V067	Possible UBX domain	Other	0.00332824	0.00315861	23.4994	23.4825	0.01684	0.991835	11	11	11	62.7	62.7	62.7	15.774	0	145.92	7886500000	132	11	11	11	1	11	11	11	11	11	10	11	11	11	11	11	10	11	11	11	11	11	10	134	134	1	116	NaN	NaN	NaN	NaN
Q7V068	Uncharacterized protein	Uncharacterized	0.0301917	0.0323171	25.1719	25.3011	-0.129164	0.608053	30	30	30	50.4	50.4	50.4	75.063	0	217.33	3403900000	143	30	30	30	1	21	22	23	22	20	23	21	22	23	22	20	23	21	22	23	22	20	23	694	694	1	164	NaN	NaN	NaN	NaN
Q7V069	Conserved hypothetical	Uncharacterized	0.10661	0.108339	26.8628	26.9136	-0.0507991	0.634	6	6	6	21.8	21.8	21.8	37.205	0	12.363	174330000	25	6	6	6	1	6	4	5	3	4	4	6	4	5	3	4	4	6	4	5	3	4	4	326	326	1	29	NaN	NaN	NaN	NaN
Q7V070	Uncharacterized protein	Uncharacterized	0.238281	0.22233	28.4959	28.4282	0.0676594	0.81061	5	5	5	47.3	47.3	47.3	12.617	0	22.111	638250000	32	5	5	5	1	4	3	4	5	4	5	4	3	4	5	4	5	4	3	4	5	4	5	112	112	1	36	NaN	NaN	NaN	NaN
Q7V073	Possible SRP19 protein	Membrane Transport	0.015352	0.0153282	23.9616	23.9891	-0.0275612	0.940047	4	4	4	60.8	60.8	60.8	11.535	0	40.953	3008500000	85	4	4	4	1	4	4	4	4	4	4	4	4	4	4	4	4	4	4	4	4	4	4	102	102	1	67	NaN	NaN	NaN	NaN
Q7V078	Uncharacterized protein	Uncharacterized	0.0155283	0.019595	24.3055	24.6677	-0.362165	0.164348	7	7	7	54.2	54.2	54.2	15.163	0	175.1	10472000000	149	7	7	7	1	7	7	7	6	7	6	7	7	7	6	7	6	7	7	7	6	7	6	142	142	1	132	NaN	NaN	NaN	NaN
Q7V079	Conserved hypothetical	Uncharacterized	0.138329	0.140545	27.0968	27.1469	-0.0500221	0.940496	2	2	2	27.4	27.4	27.4	10.891	0	8.2795	193690000	13	2	2	2	1	2	2	1	2	2	2	2	2	1	2	2	2	2	2	1	2	2	2	95	95	1	16	NaN	NaN	NaN	NaN
Q7V085	Possible permease	Membrane Transport	0.00793331	0.00780413	25.0829	25.0898	-0.00690142	0.982114	3	3	3	30.3	30.3	30.3	13.419	0	145.37	401800000	21	3	3	3	1	3	3	3	3	3	3	3	3	3	3	3	3	3	3	3	3	3	3	119	119	1	24	NaN	NaN	NaN	NaN
Q7V090	Uncharacterized protein	Uncharacterized	0.0502322	0.0479444	26.9173	26.8753	0.0419757	0.881069	2	2	2	34.4	34.4	34.4	10.655	0	13.279	1461600000	22	2	2	2	1	2	2	2	2	2	2	2	2	2	2	2	2	2	2	2	2	2	2	93	93	1	29	NaN	NaN	NaN	NaN
Q7V093	Similar to dihydroflavonol-4-reductase	Central Metabolism	0.0270064	0.0287697	26.58	26.6979	-0.117834	0.40909	11	11	11	29.2	29.2	29.2	44.402	0	38.642	1166700000	67	11	11	11	1	8	9	10	9	10	9	8	9	10	9	10	9	8	9	10	9	10	9	400	400	1	71	NaN	NaN	NaN	NaN
Q7V097	Uncharacterized protein	Uncharacterized	0.0209709	0.0201966	24.3607	24.3407	0.0199718	0.96095	4	4	4	22.2	22.2	22.2	25.678	0	9.6606	1320400000	16	4	4	4	1	3	3	3	4	3	3	3	3	3	4	3	3	3	3	3	4	3	3	225	225	1	20	NaN	NaN	NaN	NaN
Q7V099	Uncharacterized protein	Uncharacterized	0.00218118	0.00235359	23.2132	23.4059	-0.192681	0.820959	13	13	13	42.6	42.6	42.6	36.713	0	52.708	2637600000	80	13	13	13	1	13	12	10	11	13	10	13	12	10	11	13	10	13	12	10	11	13	10	331	331	1	99	NaN	NaN	NaN	NaN
Q7V0A0	GAF domain	Other	0.0113015	0.0106362	24.9157	24.8533	0.0624199	0.881314	2	2	2	27.2	27.2	27.2	10.782	0	6.3131	282330000	14	2	2	2	1	1	1	2	1	1	2	1	1	2	1	1	2	1	1	2	1	1	2	92	92	1	14	NaN	NaN	NaN	NaN
Q7V0A3	DUF209	Other	0.00269216	0.00398871	22.7824	23.3618	-0.579374	0.448268	6	6	6	15.2	15.2	15.2	46.328	0	9.2769	115280000	13	6	6	6	1	0	3	3	4	3	5	0	3	3	4	3	5	0	3	3	4	3	5	414	414	1	19	NaN	NaN	NaN	NaN
Q7V0A5	UDP-N-acetylmuramoylalanine--D-glutamate ligase	Central Metabolism	0.00258851	0.00245933	23.7119	23.6664	0.0455138	0.552873	6	6	6	25.2	25.2	25.2	28.949	0	13.974	534790000	23	6	6	6	1	6	5	4	5	4	4	6	5	4	5	4	4	6	5	4	5	4	4	250	250	1	34	NaN	NaN	NaN	NaN
Q7V0A8	Short-chain dehydrogenase/reductase (SDR) superfamily	Central Metabolism	0.03352	0.0352181	26.7903	26.892	-0.101729	0.574739	3	3	3	9.5	9.5	9.5	28.077	0.0037679	2.3412	63724000	7	3	3	3	1	3	2	1	2	1	1	3	2	1	2	1	1	3	2	1	2	1	1	243	243	1	10	NaN	NaN	NaN	NaN
Q7V0A9	Similar to DNA photolyase	Central Metabolism	0.00970832	0.0100419	25.297	25.3747	-0.0777143	0.66462	6	6	6	14.4	14.4	14.4	54.45	0	29.815	205480000	21	6	6	6	1	5	4	5	4	4	5	5	4	5	4	4	5	5	4	5	4	4	5	473	473	1	27	NaN	NaN	NaN	NaN
Q7V0B0	Uncharacterized protein	Uncharacterized	0.031956	0.0403728	25.9711	26.3513	-0.380142	0.444227	14	14	14	51.1	51.1	51.1	34.197	0	59.624	2412900000	85	14	14	14	1	10	11	12	11	10	11	10	11	12	11	10	11	10	11	12	11	10	11	309	309	1	90	NaN	NaN	NaN	NaN
Q7V0B2	Steroid 5-alpha reductase, C-terminal domain	Central Metabolism	0.0266068	0.0274307	25.8765	25.9526	-0.0761	0.748583	11	11	11	29.3	29.3	29.3	45.54	0	20.943	636010000	47	11	11	11	1	6	8	7	8	6	9	6	8	7	8	6	9	6	8	7	8	6	9	379	379	1	53	NaN	NaN	NaN	NaN
Q7V0B3	Uncharacterized protein	Uncharacterized	0.0117265	0.0104912	25.04	24.9105	0.129502	0.513676	4	4	4	27.4	27.4	27.4	20.138	0	59.339	982760000	19	4	4	4	1	3	3	4	4	4	4	3	3	4	4	4	4	3	3	4	4	4	4	186	186	1	24	NaN	NaN	NaN	NaN
Q7V0B4	Uncharacterized protein	Uncharacterized	0.0183531	0.0224501	25.1673	25.5247	-0.357382	0.555472	4	4	4	17.4	17.4	17.4	23.75	0	6.6516	850500000	27	4	4	4	1	3	3	4	3	3	4	3	3	4	3	3	4	3	3	4	3	3	4	207	207	1	27	NaN	NaN	NaN	NaN
Q7V0B5	D-3-phosphoglycerate dehydrogenase	Central Metabolism	0.0749697	0.0700853	28.7254	28.6574	0.0679983	0.609162	11	11	11	45.6	45.6	45.6	30.363	0	31.166	1013200000	53	11	11	11	1	10	9	10	11	11	9	10	9	10	11	11	9	10	9	10	11	11	9	263	263	1	72	NaN	NaN	NaN	NaN
Q7V0B8	Pentapeptide repeats	Other	0.148661	0.147548	28.2522	28.2706	-0.0183824	0.94697	4	4	4	19.1	19.1	19.1	21.326	0	13.504	599090000	26	4	4	4	1	4	3	4	3	4	4	4	3	4	3	4	4	4	3	4	3	4	4	188	188	1	30	NaN	NaN	NaN	NaN
Q7V0B9	Ribonuclease Z	Basic Cellular Processes	0.0140548	0.0141243	25.5506	25.5876	-0.0370057	0.84993	35	35	35	75.4	75.4	75.4	56.744	0	323.31	33437000000	433	35	35	35	1	33	33	34	34	34	34	33	33	34	34	34	34	33	33	34	34	34	34	528	528	1	441	NaN	NaN	NaN	NaN
Q7V0C0	Uncharacterized protein	Uncharacterized	0.00625873	0.00484993	23.8924	23.4679	0.424444	0.663027	7	7	7	55.2	55.2	55.2	20.92	0	116.67	6955900000	127	7	7	7	1	7	7	7	7	7	7	7	7	7	7	7	7	7	7	7	7	7	7	192	192	1	115	NaN	NaN	NaN	NaN
Q7V0C1	50S ribosomal protein L27	Basic Cellular Processes	0.15222	0.150498	27.1306	27.1418	-0.0111561	0.924756	16	16	16	53.5	53.5	53.5	34.58	0	96.866	1669000000	100	16	16	16	1	15	15	14	12	13	11	15	15	14	12	13	11	15	15	14	12	13	11	312	312	1	114	NaN	NaN	NaN	NaN
Q7V0C2	50S ribosomal protein L21	Basic Cellular Processes	0.065224	0.070119	26.6693	26.8034	-0.134129	0.371026	2	2	2	9.4	9.4	9.4	25.693	0	4.9305	151420000	17	2	2	2	1	2	2	2	2	2	2	2	2	2	2	2	2	2	2	2	2	2	2	223	223	1	17	NaN	NaN	NaN	NaN
Q7V0C3	Circadian clock protein KaiB	Basic Cellular Processes	0.0684722	0.076177	26.2924	26.475	-0.182638	0.242667	5	5	5	48.8	48.8	48.8	9.3166	0	13.635	3097900000	36	5	5	5	1	5	5	4	5	4	4	5	5	4	5	4	4	5	5	4	5	4	4	86	86	1	38	NaN	NaN	NaN	NaN
Q7V0C4	Circadian clock protein kinase KaiC	Basic Cellular Processes	0.101378	0.0961319	29.1081	29.0607	0.0473639	0.575698	10	10	10	53.4	53.4	53.4	16.817	0	70.084	3357300000	70	10	10	10	1	8	8	10	9	8	10	8	8	10	9	8	10	8	8	10	9	8	10	146	146	1	74	NaN	NaN	NaN	NaN
Q7V0C5	Two-component sensor histidine kinase	Basic Cellular Processes	0.0159422	0.0171427	26.8566	27.0093	-0.152691	0.7748	13	13	13	90.7	90.7	90.7	11.957	0	76.864	2821300000	112	13	13	13	1	11	11	11	11	12	13	11	11	11	11	12	13	11	11	11	11	12	13	107	107	1	113	NaN	NaN	NaN	NaN
Q7V0C6	Phosphoribosylamine--glycine ligase	Central Metabolism	0.0200418	0.0185936	26.576	26.4961	0.0798918	0.447137	30	30	30	63.7	63.7	63.7	56.949	0	296.41	28411000000	348	30	30	30	1	29	29	30	30	28	30	29	29	30	30	28	30	29	29	30	30	28	30	509	509	1	355	NaN	NaN	NaN	NaN
Q7V0C7	Phosphoribosylaminoimidazole-succinocarboxamide synthase	Central Metabolism	0.045905	0.0446523	26.8892	26.8816	0.00757599	0.980618	27	27	27	46.6	46.6	46.6	77.499	0	250.91	3948400000	128	27	27	27	1	21	23	21	19	22	22	21	23	21	19	22	22	21	23	21	19	22	22	689	689	1	160	NaN	NaN	NaN	NaN
Q7V0C8	Chloroplast outer envelope membrane protein homolog	Photosynthesis	0.0440512	0.0422394	28.391	28.3605	0.0304133	0.798164	24	24	24	52.1	52.1	52.1	49.311	0	116.12	4688500000	158	24	24	24	1	22	22	24	22	22	20	22	22	24	22	22	20	22	22	24	22	22	20	445	445	1	164	NaN	NaN	NaN	NaN
Q7V0C9	UDP-3-O-acyl-N-acetylglucosamine deacetylase	Central Metabolism	0.0246301	0.0253283	26.1888	26.2627	-0.0738665	0.784795	19	19	19	66.1	66.1	66.1	27.869	0	133.3	5622200000	145	19	19	19	1	17	17	16	15	17	16	17	17	16	15	17	16	17	17	16	15	17	16	242	242	1	167	NaN	NaN	NaN	NaN
Q7V0D0	3-hydroxyacyl-[acyl-carrier-protein] dehydratase FabZ	Central Metabolism	0.0361452	0.0366777	25.8771	25.9266	-0.0495504	0.742339	47	47	47	75	75	75	78.848	0	323.31	40501000000	544	47	47	47	1	42	41	44	41	42	44	42	41	44	41	42	44	42	41	44	41	42	44	713	713	1	537	NaN	NaN	NaN	NaN
Q7V0D1	Acyl-[acyl-carrier-protein]--UDP-N-acetylglucosamine O-acyltransferase	Central Metabolism	0.0722302	0.0714593	27.7569	27.7696	-0.012668	0.945849	14	14	14	56.8	56.8	56.8	30.7	0	128.45	2246100000	59	14	14	14	1	13	13	12	11	12	10	13	13	12	11	12	10	13	13	12	11	12	10	278	278	1	81	NaN	NaN	NaN	NaN
Q7V0D2	Lipid-A-disaccharide synthase	Central Metabolism	0.00502989	0.00503827	24.3994	24.4295	-0.0300967	0.7798	3	3	3	28.9	28.9	28.9	16.809	0	9.0487	818430000	27	3	3	3	1	2	3	3	3	2	3	2	3	3	3	2	3	2	3	3	3	2	3	152	152	1	19	NaN	NaN	NaN	NaN
Q7V0D3	Peptide methionine sulfoxide reductase MsrA	Central Metabolism	0.00822612	0.00925293	24.1378	24.3318	-0.193948	0.317788	12	12	12	51.4	51.4	51.4	30.26	0	74.051	3482900000	83	12	12	12	1	11	11	9	11	11	12	11	11	9	11	11	12	11	11	9	11	11	12	280	280	1	85	NaN	NaN	NaN	NaN
Q7V0D4	Probable cytosol aminopeptidase	Basic Cellular Processes	0.0625447	0.0587536	28.3593	28.2983	0.0609697	0.512634	11	11	11	33.4	33.4	33.4	44.822	0	18.95	554770000	36	11	11	11	1	7	11	9	7	8	10	7	11	9	7	8	10	7	11	9	7	8	10	392	392	1	52	NaN	NaN	NaN	NaN
Q7V0D6	Uncharacterized protein	Uncharacterized	0.0127541	0.0152854	23.8622	24.1337	-0.271461	0.605529	4	4	4	25	25	25	23.129	0	13.08	432710000	19	4	4	4	1	4	4	4	4	3	4	4	4	4	4	3	4	4	4	4	4	3	4	200	200	1	31	NaN	NaN	NaN	NaN
Q7V0D7	Tyrosine--tRNA ligase	Basic Cellular Processes	0.00918145	0.00958656	25.3362	25.4293	-0.0931225	0.666089	26	26	26	61.5	61.5	61.5	54.028	0	323.31	23359000000	355	26	26	26	1	24	23	25	25	24	25	24	23	25	25	24	25	24	23	25	25	24	25	491	491	1	331	NaN	NaN	NaN	NaN
Q7V0D8	Orotidine 5-phosphate decarboxylase	Central Metabolism	0.0201517	0.0203023	25.6845	25.7264	-0.0418523	0.834961	7	7	7	59.8	59.8	59.8	12.843	0	22.788	317920000	18	7	7	7	1	5	5	4	7	4	5	5	5	4	7	4	5	5	5	4	7	4	5	107	107	1	33	NaN	NaN	NaN	NaN
Q7V0D9	Glycerol-3-phosphate acyltransferase	Central Metabolism	0.0262743	0.0375528	25.7083	26.3207	-0.61244	0.52991	18	18	18	50.2	50.2	50.2	46.617	0	139.35	2770100000	102	18	18	18	1	15	17	16	16	17	15	15	17	16	16	17	15	15	17	16	16	17	15	412	412	1	128	NaN	NaN	NaN	NaN
Q7V0E0	Uncharacterized protein	Uncharacterized	0.0598472	0.0546099	27.7493	27.6405	0.108864	0.63956	6	6	6	29.7	29.7	29.7	26.274	0	37.414	869560000	30	6	6	6	1	5	5	6	5	6	4	5	5	6	5	6	4	5	5	6	5	6	4	239	239	1	32	NaN	NaN	NaN	NaN
Q7V0E1	Uncharacterized protein	Uncharacterized	0.026295	0.0314457	24.9338	25.5012	-0.56743	0.78237	2	2	2	11.1	11.1	11.1	21.732	0	50.049	683880000	12	2	2	2	1	2	2	2	2	2	2	2	2	2	2	2	2	2	2	2	2	2	2	198	198	1	17	NaN	NaN	NaN	NaN
Q7V0E2	Possible transporter, membrane component	Membrane Transport	0.0226053	0.0220011	25.9222	25.912	0.0101763	0.972186	23	23	23	63.4	63.4	63.4	38.034	0	192.52	7489500000	154	23	23	23	1	21	19	18	21	19	20	21	19	18	21	19	20	21	19	18	21	19	20	336	336	1	174	NaN	NaN	NaN	NaN
Q7V0E4	Putative isoamylase	Central Metabolism	0.00832567	0.0078934	25.9149	25.8659	0.0490227	0.258817	4	4	4	32.8	32.8	32.8	15.833	0	21.121	680340000	14	4	4	4	1	2	4	4	4	3	2	2	4	4	4	3	2	2	4	4	4	3	2	134	134	1	35	NaN	NaN	NaN	NaN
Q7V0E5	Bacterial histone-like DNA-binding protein	Basic Cellular Processes	4.65041	4.89667	32.1403	32.2475	-0.107161	0.673335	3	3	3	15.1	15.1	15.1	26.85	0	10.076	852440000	23	3	3	3	1	3	3	3	3	3	3	3	3	3	3	3	3	3	3	3	3	3	3	251	251	1	30	NaN	NaN	NaN	NaN
Q7V0E8	Possible high light inducible protein	Photosynthesis	0.0103056	0.0118259	23.1501	23.5022	-0.352088	0.772558	32	32	32	54.1	54.1	54.1	77.891	0	262.78	5451300000	223	32	32	32	1	28	31	29	26	28	27	28	31	29	26	28	27	28	31	29	26	28	27	677	677	1	236	NaN	NaN	NaN	NaN
Q7V0F0	Ketol-acid reductoisomerase (NADP(+))	Central Metabolism	0.204494	0.196336	29.4906	29.4611	0.0294819	0.82123	15	15	15	84.6	84.6	84.6	9.7682	0	179.59	119310000000	536	15	15	15	1	13	13	13	15	14	14	13	13	13	15	14	14	13	13	13	15	14	14	91	91	1	507	NaN	NaN	NaN	NaN
Q7V0F1	ATP-dependent Clp protease proteolytic subunit 2	Basic Cellular Processes	0.117096	0.113535	27.9766	27.96	0.0166016	0.846626	1	1	1	28.4	28.4	28.4	9.7858	0	15.476	98868000	12	1	1	1	1	1	1	1	1	1	1	1	1	1	1	1	1	1	1	1	1	1	1	88	88	1	9	NaN	NaN	NaN	NaN
Q7V0F2	ATP-dependent Clp protease proteolytic subunit	Basic Cellular Processes	0.149279	0.14283	28.4537	28.4216	0.0320702	0.880855	32	32	32	93.9	93.9	93.9	36.629	0	323.31	48060000000	489	32	32	32	1	30	29	32	30	32	31	30	29	32	30	32	31	30	29	32	30	32	31	329	329	1	475	NaN	NaN	NaN	NaN
Q7V0F3	Uncharacterized protein	Uncharacterized	0.0576268	0.0535064	27.8279	27.749	0.0789502	0.665916	13	13	13	49.3	49.3	49.3	22.16	0	58.065	9609200000	155	13	13	13	1	12	13	13	13	13	13	12	13	13	13	13	13	12	13	13	13	13	13	201	201	1	165	NaN	NaN	NaN	NaN
Q7V0F5	Uncharacterized protein	Uncharacterized	0.0320817	0.0346043	25.5454	25.6827	-0.13728	0.1512	13	13	13	49.5	49.5	49.5	24.306	0	89.347	9500300000	126	13	13	13	1	10	9	10	11	11	12	10	9	10	11	11	12	10	9	10	11	11	12	220	220	1	143	NaN	NaN	NaN	NaN
Q7V0F6	D-alanine--D-alanine ligase	Basic Cellular Processes	0.00809972	0.00777654	24.9418	24.9125	0.0293261	0.866176	13	13	13	40.9	40.9	40.9	40.224	0	154.43	10463000000	194	13	13	13	1	13	11	11	11	11	11	13	11	11	11	11	11	13	11	11	11	11	11	369	369	1	168	NaN	NaN	NaN	NaN
Q7V0F7	tRNA-2-methylthio-N(6)-dimethylallyladenosine synthase	Central Metabolism	0.00683878	0.00681433	25.0799	25.1032	-0.0232608	0.965422	6	6	6	40.4	40.4	40.4	15.435	0	23.249	961040000	46	6	6	6	1	6	5	5	6	4	5	6	5	5	6	4	5	6	5	5	6	4	5	136	136	1	52	NaN	NaN	NaN	NaN
Q7V0F8	Possible cytosine deaminase	Central Metabolism	0.00910561	0.00828907	25.3182	25.2159	0.102293	0.604345	13	13	13	50.4	50.4	50.4	39.975	0	97.926	1575000000	81	13	13	13	1	11	12	11	12	12	13	11	12	11	12	12	13	11	12	11	12	12	13	355	355	1	106	NaN	NaN	NaN	NaN
Q7V0F9	Uncharacterized protein	Uncharacterized	0.022177	0.0201776	26.7421	26.6338	0.108292	0.232167	9	9	9	25	25	25	53.195	0	26.982	645960000	31	9	9	9	1	7	8	8	8	6	7	7	8	8	8	6	7	7	8	8	8	6	7	464	464	1	44	NaN	NaN	NaN	NaN
Q7V0G0	Acetylornithine aminotransferase	Central Metabolism	0.0247844	0.0234921	26.7823	26.7332	0.0491339	0.373212	14	14	14	46	46	46	46.823	0	82.121	1822000000	81	14	14	14	1	14	13	13	12	13	12	14	13	13	12	13	12	14	13	13	12	13	12	411	411	1	87	NaN	NaN	NaN	NaN
Q7V0G1	UDP-N-acetylglucosamine 1-carboxyvinyltransferase	Central Metabolism	0.00700926	0.00790902	25.0943	25.3	-0.205668	0.457252	17	17	17	44.6	44.6	44.6	50.584	0	103	5249200000	126	17	17	17	1	15	15	16	16	16	15	15	15	16	16	16	15	15	15	16	16	16	15	451	451	1	142	NaN	NaN	NaN	NaN
Q7V0G2	Dihydrolipoyl dehydrogenase	Central Metabolism	0.070204	0.0661881	28.4915	28.4342	0.0573095	0.55301	29	29	29	67.2	67.2	67.2	45.639	0	211.78	6658700000	210	29	29	29	1	27	27	28	26	28	25	27	27	28	26	28	25	27	27	28	26	28	25	415	415	1	215	NaN	NaN	NaN	NaN
Q7V0G5	Putative nickel-containing superoxide dismutase (NISOD)	Oxidative Stress	0.271538	0.322128	28.824	29.0983	-0.274314	0.19	14	14	14	36.1	36.1	36.1	49.714	0	126.98	1157700000	60	14	14	14	1	8	12	12	12	12	11	8	12	12	12	12	11	8	12	12	12	12	11	457	457	1	72	NaN	NaN	NaN	NaN
Q7V0G6	Peptidyl-prolyl cis-trans isomerase	Central Metabolism	0.106309	0.108015	27.7524	27.8033	-0.0508054	0.897527	28	28	28	64.1	64.1	64.1	51.448	0	281.07	20363000000	319	28	28	28	1	27	26	26	25	26	26	27	26	26	25	26	26	27	26	26	25	26	26	479	479	1	322	NaN	NaN	NaN	NaN
Q7V0G8	ADP-dependent (S)-NAD(P)H-hydrate dehydratase	Central Metabolism	0.0100596	0.00991651	25.8098	25.8162	-0.00642904	0.97922	10	10	10	53.8	53.8	53.8	17.493	0	94.829	21278000000	218	10	10	10	1	9	10	10	10	10	10	9	10	10	10	10	10	9	10	10	10	10	10	156	156	1	196	NaN	NaN	NaN	NaN
Q7V0G9	RNA polymerase sigma factor	Basic Cellular Processes	0.0291317	0.0290251	26.6043	26.6271	-0.0228113	0.951304	6	6	6	34.2	34.2	34.2	20.313	0	25.298	2661800000	71	6	6	6	1	6	6	6	6	6	6	6	6	6	6	6	6	6	6	6	6	6	6	190	190	1	110	NaN	NaN	NaN	NaN
Q7V0H0	Pyruvate dehydrogenase E1 component subunit alpha	Central Metabolism	0.116006	0.10555	28.7411	28.6346	0.106515	0.309549	25	25	25	53.4	53.4	53.4	57.35	0	111.22	2466800000	135	25	25	25	1	21	20	22	21	19	20	21	20	22	21	19	20	21	20	22	21	19	20	521	521	1	157	NaN	NaN	NaN	NaN
Q7V0H1	Uncharacterized protein	Uncharacterized	0.107397	0.102647	29.6555	29.6187	0.0367934	0.665622	13	13	12	53.4	53.4	51.1	35.63	0	181.68	2731400000	62	13	13	12	1	12	10	10	11	11	11	12	10	10	11	11	11	11	9	9	10	10	10	313	313	1	84	NaN	NaN	NaN	NaN
Q7V0H2	Signal recognition particle protein	Basic Cellular Processes	0.0553861	0.0551823	28.2045	28.2285	-0.0240339	0.771317	25	25	25	65.5	65.5	65.5	38.726	0	265.86	15064000000	301	25	25	25	1	23	23	24	23	23	24	23	23	24	23	23	24	23	23	24	23	23	24	345	345	1	285	NaN	NaN	NaN	NaN
Q7V0H3	PhoH-like phosphate starvation-inducible protein	Inorganic Nutrient Processing	0.0376715	0.036556	27	26.9863	0.0136649	0.950105	61	61	61	71.9	71.9	71.9	79.938	0	323.31	57473000000	638	61	61	61	1	57	56	57	57	59	54	57	56	57	57	59	54	57	56	57	57	59	54	702	702	1	630	NaN	NaN	NaN	NaN
Q7V0H4	Uncharacterized protein	Uncharacterized	0.0736623	0.0755738	27.5926	27.657	-0.0643768	0.772011	42	42	42	68.7	68.7	68.7	53.886	0	323.31	22364000000	443	42	42	42	1	38	39	39	39	40	39	38	39	39	39	40	39	38	39	39	39	40	39	498	498	1	471	NaN	NaN	NaN	NaN
Q7V0H6	GTPase Era	Basic Cellular Processes	0.0173388	0.0172119	25.8123	25.8258	-0.0135021	0.967224	12	12	12	60.7	60.7	60.7	35.096	0	95.407	2534900000	73	12	12	12	1	7	10	8	10	8	8	7	10	8	10	8	8	7	10	8	10	8	8	318	318	1	77	NaN	NaN	NaN	NaN
Q7V0H7	Multifunctional fusion protein	Other	0.0203324	0.019245	26.4681	26.4154	0.0526225	0.745898	2	2	2	10.6	10.6	10.6	25.234	0	105.48	2710400000	17	2	2	2	1	2	2	2	2	2	2	2	2	2	2	2	2	2	2	2	2	2	2	245	245	1	13	NaN	NaN	NaN	NaN
Q7V0H8	Uncharacterized protein	Uncharacterized	0.0216649	0.032052	24.5848	25.0033	-0.418504	0.945379	2	2	2	8.6	8.6	8.6	33.886	0	8.4955	511080000	16	2	2	2	1	2	2	2	2	2	2	2	2	2	2	2	2	2	2	2	2	2	2	303	303	1	17	NaN	NaN	NaN	NaN
Q7V0H9	Putative circadian phase modifier CpmA homolog	Basic Cellular Processes	0.0196832	0.0174746	25.5143	25.3728	0.141539	0.616231	21	21	21	53.6	53.6	53.6	45.956	0	94.603	2523900000	136	21	21	21	1	20	19	18	17	18	20	20	19	18	17	18	20	20	19	18	17	18	20	407	407	1	152	NaN	NaN	NaN	NaN
Q7V0I3	Thiamine-phosphate synthase	Central Metabolism	0.0126063	0.0124698	25.5654	25.5741	-0.00864474	0.978442	4	4	4	28.4	28.4	28.4	17.592	0	27.052	520210000	11	4	4	4	1	3	1	2	2	2	3	3	1	2	2	2	3	3	1	2	2	2	3	148	148	1	15	NaN	NaN	NaN	NaN
Q7V0I4	Riboflavin biosynthesis protein	Central Metabolism	0.0214709	0.0200531	26.135	26.0694	0.0655778	0.783503	6	6	6	35.3	35.3	35.3	23.684	0	11.3	748830000	22	6	6	6	1	5	5	5	5	6	4	5	5	5	5	6	4	5	5	5	5	6	4	218	218	1	33	NaN	NaN	NaN	NaN
Q7V0I5	Uncharacterized protein	Uncharacterized	0.0228353	0.0177437	25.4164	25.0932	0.323264	0.474756	12	12	12	38.5	38.5	38.5	39.599	0	62.795	1595600000	80	12	12	12	1	9	10	11	8	10	9	9	10	11	8	10	9	9	10	11	8	10	9	351	351	1	81	NaN	NaN	NaN	NaN
Q7V0I6	5-nucleotidase SurE	Basic Cellular Processes	0.0561035	0.0509915	27.3351	27.2252	0.109952	0.383426	10	10	10	35.5	35.5	35.5	34.305	0	38.432	1782800000	82	10	10	10	1	10	9	10	10	9	9	10	9	10	10	9	9	10	9	10	10	9	9	307	307	1	68	NaN	NaN	NaN	NaN
Q7V0I7	Phenylalanine--tRNA ligase alpha subunit	Basic Cellular Processes	0.032331	0.0308464	26.8563	26.8169	0.0393766	0.737702	2	2	2	13.6	13.6	13.6	19.404	0	6.165	616790000	22	2	2	2	1	2	2	2	1	2	2	2	2	2	1	2	2	2	2	2	1	2	2	177	177	1	25	NaN	NaN	NaN	NaN
Q7V0I8	NAD kinase 2	Central Metabolism	0.0469504	0.0446235	27.2418	27.2006	0.041254	0.80473	12	12	12	49.8	49.8	49.8	29.571	0	54.695	2412300000	57	12	12	12	1	10	11	9	11	11	9	10	11	9	11	11	9	10	11	9	11	11	9	269	269	1	75	NaN	NaN	NaN	NaN
Q7V0I9	Putative precorrin-6y methylase	Central Metabolism	0.0193193	0.017667	26.4582	26.3599	0.0983264	0.483307	24	24	24	68.1	68.1	68.1	38.127	0	89.851	7705800000	161	24	24	24	1	21	19	20	22	22	22	21	19	20	22	22	22	21	19	20	22	22	22	335	335	1	174	NaN	NaN	NaN	NaN
Q7V0J0	Conserved hypothetical	Uncharacterized	0.0286349	0.0220754	25.1965	24.4484	0.748166	0.753921	8	8	8	32.1	32.1	32.1	33.004	0	45.722	2395500000	68	8	8	8	1	6	7	6	8	7	7	6	7	6	8	7	7	6	7	6	8	7	7	302	302	1	71	NaN	NaN	NaN	NaN
Q7V0J1	Uncharacterized protein	Uncharacterized	0.0067564	0.00768995	23.5841	23.7964	-0.212332	0.410721	14	14	14	38.3	38.3	38.3	48.897	0	127.14	1982500000	87	14	14	14	1	13	11	12	11	9	11	13	11	12	11	9	11	13	11	12	11	9	11	426	426	1	87	NaN	NaN	NaN	NaN
Q7V0J2	ATP-dependent zinc metalloprotease FtsH	Basic Cellular Processes	0.183503	0.180393	30.2501	30.253	-0.00293732	0.989085	5	5	5	55	55	55	14.394	0	55.669	467690000	21	5	5	5	1	5	5	4	1	4	3	5	5	4	1	4	3	5	5	4	1	4	3	120	120	1	27	NaN	NaN	NaN	NaN
Q7V0J3	Ornithine carbamoyltransferase	Central Metabolism	0.0659937	0.06294	27.7629	27.7251	0.03781	0.761152	3	3	3	19.3	19.3	19.3	19.058	0	8.1411	215360000	19	3	3	3	1	2	3	3	3	3	3	2	3	3	3	3	3	2	3	3	3	3	3	166	166	1	19	NaN	NaN	NaN	NaN
Q7V0J4	LexA repressor	Basic Cellular Processes	0.0131976	0.0204304	24.5523	25.52	-0.967772	0.592669	55	55	50	78.4	78.4	75	67.226	0	323.31	107910000000	810	55	55	50	1	53	53	55	54	55	54	53	53	55	54	55	54	48	48	50	49	50	49	620	620	1	718	NaN	NaN	NaN	NaN
Q7V0J5	UDP-glucose 6-dehydrogenase	Central Metabolism	0.116476	0.107389	29.2065	29.1177	0.0887699	0.290097	14	14	14	42.5	42.5	42.5	34.873	0	159.11	4485200000	124	14	14	14	1	13	13	14	13	13	13	13	13	14	13	13	13	13	13	14	13	13	13	308	308	1	122	NaN	NaN	NaN	NaN
Q7V0J6	Nucleoside-diphosphate-sugar epimerase	Central Metabolism	0.00811752	0.00797399	24.7551	24.7565	-0.00140444	1	4	4	4	34.3	34.3	34.3	23.207	0	29.76	488460000	19	4	4	4	1	2	2	4	4	4	3	2	2	4	4	4	3	2	2	4	4	4	3	207	207	1	19	NaN	NaN	NaN	NaN
Q7V0J7	Pyridoxal-phosphate-dependent aminotransferase	Central Metabolism	0.140976	0.130257	29.1923	29.1071	0.085261	0.447936	39	39	39	78.9	78.9	78.9	53.431	0	286.33	20146000000	284	39	39	39	1	35	32	35	35	35	33	35	32	35	35	35	33	35	32	35	35	35	33	474	474	1	301	NaN	NaN	NaN	NaN
Q7V0J8	Pyridoxal-phosphate-dependent aminotransferase	Central Metabolism	0.191769	0.17217	29.6131	29.4859	0.127169	0.467015	7	7	7	26.7	26.7	26.7	35.552	0	15.291	352990000	22	7	7	7	1	4	6	5	6	5	4	4	6	5	6	5	4	4	6	5	6	5	4	311	311	1	31	NaN	NaN	NaN	NaN
Q7V0J9	Possible dTDP-glucose 4,6-dehydratase	Central Metabolism	0.0303425	0.0284678	26.737	26.6751	0.061882	0.610527	25	25	25	57.5	57.5	57.5	43.598	0	152.79	13286000000	202	25	25	25	1	22	24	23	23	25	24	22	24	23	23	25	24	22	24	23	23	25	24	388	388	1	204	NaN	NaN	NaN	NaN
Q7V0K0	Putative glycosyl transferase, family 2	Central Metabolism	0.00932996	0.00998026	24.8649	24.9912	-0.126365	0.220308	25	25	25	74.3	74.3	74.3	43.323	0	194.84	15735000000	205	25	25	25	1	25	25	23	24	24	23	25	25	23	24	24	23	25	25	23	24	24	23	382	382	1	242	NaN	NaN	NaN	NaN
Q7V0K1	Uncharacterized protein	Uncharacterized	0.00202404	0.0021125	23.2171	23.3072	-0.0901012	0.720697	16	16	16	48.6	48.6	48.6	38.722	0	55.944	3361400000	113	16	16	16	1	13	15	15	14	15	16	13	15	15	14	15	16	13	15	15	14	15	16	329	329	1	121	NaN	NaN	NaN	NaN
Q7V0K2	Putative glycosyl transferase, family 2	Central Metabolism	0.0161985	0.0157629	25.8111	25.8007	0.0104656	0.947913	7	7	7	28.1	28.1	28.1	34.655	0	17.675	866230000	31	7	7	7	1	6	7	7	6	6	5	6	7	7	6	6	5	6	7	7	6	6	5	292	292	1	45	NaN	NaN	NaN	NaN
Q7V0K3	Possible methyltransferase	Central Metabolism	0.00806502	0.00735054	24.1807	24.0874	0.0932865	0.891538	3	3	3	7.7	7.7	7.7	49.371	0	5.201	143630000	9	3	3	3	1	3	3	3	3	2	2	3	3	3	3	2	2	3	3	3	3	2	2	430	430	1	16	NaN	NaN	NaN	NaN
Q7V0K5	Carbamoyltransferase	Central Metabolism	0.0169649	0.0181899	26.8054	26.9363	-0.130838	0.477172	6	6	6	21.3	21.3	21.3	36.868	0	25.533	1392400000	37	6	6	6	1	6	6	6	6	6	6	6	6	6	6	6	6	6	6	6	6	6	6	324	324	1	42	NaN	NaN	NaN	NaN
Q7V0K9	Uncharacterized protein	Uncharacterized	0.23991	0.228006	29.9925	29.9482	0.0443643	0.486596	3	3	3	19.7	19.7	19.7	25.102	0	11.516	222650000	12	3	3	3	1	3	2	2	2	2	2	3	2	2	2	2	2	3	2	2	2	2	2	213	213	1	13	NaN	NaN	NaN	NaN
Q7V0L0	Carbamoyltransferase	Central Metabolism	0.0775246	0.0737341	28.9836	28.9391	0.0444082	0.368108	24	23	23	38.6	37.4	37.4	70.768	0	100.92	3523800000	170	24	23	23	1	22	19	19	18	21	19	21	18	18	17	20	18	21	18	18	17	20	18	617	617	1	193	NaN	NaN	NaN	NaN
Q7V0L1	Uncharacterized protein	Uncharacterized	0.0466014	0.0377875	25.9731	25.6944	0.278658	0.257763	36	36	36	75.3	75.3	75.3	46.454	0	323.31	40828000000	444	36	36	36	1	31	32	33	35	36	34	31	32	33	35	36	34	31	32	33	35	36	34	397	397	1	435	NaN	NaN	NaN	NaN
Q7V0L3	Possible methyltransferase	Central Metabolism	0.0402222	0.0411494	26.9179	26.9781	-0.0602678	0.607262	42	42	41	59.2	59.2	58	69.748	0	323.31	34126000000	463	42	42	41	1	38	39	38	39	39	40	38	39	38	39	39	40	37	38	37	38	38	39	610	610	1	462	NaN	NaN	NaN	NaN
Q7V0L5	Uncharacterized protein	Uncharacterized	0.0220707	0.0231457	26.0383	26.1515	-0.113178	0.804409	2	2	2	21.4	21.4	21.4	14.993	0.0081542	1.9395	485630000	6	2	2	2	1	2	2	2	2	2	2	2	2	2	2	2	2	2	2	2	2	2	2	126	126	1	12	NaN	NaN	NaN	NaN
Q7V0L6	Methyltransferase	Central Metabolism	0.0461968	0.0466037	26.7841	26.8256	-0.0415185	0.622833	14	14	14	54.1	54.1	54.1	32.968	0	120.22	6019400000	124	14	14	14	1	14	14	13	14	13	13	14	14	13	14	13	13	14	14	13	14	13	13	281	281	1	148	NaN	NaN	NaN	NaN
Q7V0L7	ABC transporter	Membrane Transport	0.0158587	0.0147668	26.6553	26.5806	0.0746129	0.410622	6	6	6	34	34	34	33.082	0	29.136	880750000	37	6	6	6	1	4	4	4	5	5	4	4	4	4	5	5	4	4	4	4	5	5	4	282	282	1	34	NaN	NaN	NaN	NaN
Q7V0L8	Uncharacterized protein	Uncharacterized	0.00755692	0.00754976	24.7508	24.7855	-0.0347258	0.946342	17	17	17	59.2	59.2	59.2	26.436	0	74.877	5747100000	172	17	17	17	1	17	16	16	16	16	15	17	16	16	16	16	15	17	16	16	16	16	15	223	223	1	188	NaN	NaN	NaN	NaN
Q7V0L9	Uncharacterized protein	Uncharacterized	0.0738237	0.0741526	27.318	27.3522	-0.0341905	0.80644	19	19	19	44.8	44.8	44.8	67.447	0	123.84	4447000000	138	19	19	19	1	18	18	18	19	18	15	18	18	18	19	18	15	18	18	18	19	18	15	594	594	1	141	NaN	NaN	NaN	NaN
Q7V0M0	Uncharacterized protein	Uncharacterized	0.0266692	0.0297361	26.442	26.6222	-0.180143	0.515219	11	11	11	33.1	33.1	33.1	39.637	0	35.879	638310000	27	11	11	11	1	8	8	8	6	8	7	8	8	8	6	8	7	8	8	8	6	8	7	335	335	1	46	NaN	NaN	NaN	NaN
Q7V0M1	Possible N-terminal of transketolase	Carbon Fixation	0.0248611	0.0251538	26.1987	26.2433	-0.0445735	0.554518	19	19	19	65.8	65.8	65.8	24.146	0	87.6	5439500000	139	19	19	19	1	18	18	19	17	19	19	18	18	19	17	19	19	18	18	19	17	19	19	202	202	1	177	NaN	NaN	NaN	NaN
Q7V0M2	Zinc-containing alcohol dehydrogenase superfamily	Energy Production and Conversion	0.0621336	0.0573993	27.8299	27.7468	0.0831064	0.61096	12	12	12	43.6	43.6	43.6	33.651	0	78.031	3685800000	96	12	12	12	1	11	10	11	12	10	11	11	10	11	12	10	11	11	10	11	12	10	11	305	305	1	99	NaN	NaN	NaN	NaN
Q7V0M3	dTDP-4-dehydrorhamnose reductase	Central Metabolism	0.00895869	0.0102114	24.7377	24.952	-0.214254	0.477653	18	18	18	54.7	54.7	54.7	31.202	0	69.628	4477900000	95	18	18	18	1	16	16	14	15	15	15	16	16	14	15	15	15	16	16	14	15	15	15	276	276	1	130	NaN	NaN	NaN	NaN
Q7V0M4	Methyltransferase	Central Metabolism	0.083302	0.0799279	28.5418	28.5102	0.0315997	0.488316	28	28	28	79.3	79.3	79.3	37.266	0	282.55	13824000000	221	28	28	28	1	28	23	25	25	26	24	28	23	25	25	26	24	28	23	25	25	26	24	343	343	1	243	NaN	NaN	NaN	NaN
Q7V0M5	Conserved hypothetical	Uncharacterized	0.0870233	0.089325	28.1285	28.2015	-0.0730158	0.763126	11	11	11	45.9	45.9	45.9	32.498	0	52.197	836160000	44	11	11	11	1	7	9	9	8	8	9	7	9	9	8	8	9	7	9	9	8	8	9	279	279	1	56	NaN	NaN	NaN	NaN
Q7V0M6	Dehydrogenase E1 component beta subunit	Central Metabolism	0.087254	0.0733576	28.17	27.9503	0.219614	0.217443	35	35	35	71.1	71.1	71.1	48.341	0	263.51	21169000000	320	35	35	35	1	31	33	34	31	33	30	31	33	34	31	33	30	31	33	34	31	33	30	418	418	1	301	NaN	NaN	NaN	NaN
Q7V0M7	Dehydrogenase, E1 component	Central Metabolism	0.123772	0.107845	28.7428	28.5731	0.169701	0.358113	17	17	17	52	52	52	34.751	0	91.366	7760600000	143	17	17	17	1	17	16	15	13	15	15	17	16	15	13	15	15	17	16	15	13	15	15	302	302	1	150	NaN	NaN	NaN	NaN
Q7V0M8	Uncharacterized protein	Uncharacterized	0.0164305	0.0160575	26.0924	26.0867	0.00569725	0.98027	13	13	13	51.1	51.1	51.1	35.129	0	98.479	6550500000	116	13	13	13	1	13	12	13	12	12	12	13	12	13	12	12	12	13	12	13	12	12	12	309	309	1	121	NaN	NaN	NaN	NaN
Q7V0M9	Putative UDP-N-acetylglucosamine-1-phosphate transferase	Central Metabolism	0.0210048	0.0175044	26.1903	25.9189	0.271365	0.627217	19	19	19	62.3	62.3	62.3	35.821	0	170.85	16664000000	164	19	19	19	1	18	19	18	19	19	17	18	19	18	19	19	17	18	19	18	19	19	17	324	324	1	180	NaN	NaN	NaN	NaN
Q7V0N1	Uncharacterized protein	Uncharacterized	0.0195569	0.0180193	26.9792	26.8889	0.090222	0.336402	15	15	15	42	42	42	45.705	0	75.248	3235000000	134	15	15	15	1	14	14	14	14	13	12	14	14	14	14	13	12	14	14	14	14	13	12	388	388	1	140	NaN	NaN	NaN	NaN
Q7V0N2	Putative polysaccharide export protein	Membrane Transport	0.0129145	0.0123598	25.5991	25.5646	0.0345192	0.856009	5	5	5	15.7	15.7	15.7	36.754	0	23.725	592340000	13	5	5	5	1	5	4	3	3	3	2	5	4	3	3	3	2	5	4	3	3	3	2	325	325	1	21	NaN	NaN	NaN	NaN
Q7V0N3	Putative glycosyl transferase, group 1	Central Metabolism	0.0143251	0.0147572	25.8704	25.9389	-0.0684465	0.794599	36	36	36	56.6	56.6	56.6	68.287	0	242.62	12228000000	266	36	36	36	1	34	33	34	35	33	33	34	33	34	35	33	33	34	33	34	35	33	33	603	603	1	308	NaN	NaN	NaN	NaN
Q7V0N4	Possible glycosyl transferase	Central Metabolism	0.01501	0.0115375	25.7117	25.3589	0.352779	0.286841	19	19	19	43.6	43.6	43.6	39.136	0	72.753	2824200000	113	19	19	19	1	18	19	19	18	19	17	18	19	19	18	19	17	18	19	19	18	19	17	351	351	1	159	NaN	NaN	NaN	NaN
Q7V0N5	Glycosyl transferase, group 1	Central Metabolism	0.00323531	0.00363935	23.6598	23.8599	-0.200078	0.310518	8	8	8	21.7	21.7	21.7	44.857	0	15.962	724880000	39	8	8	8	1	7	7	7	8	6	6	7	7	7	8	6	6	7	7	7	8	6	6	382	382	1	51	NaN	NaN	NaN	NaN
Q7V0N7	Putative nucleoside-diphosphate sugar epimerase	Central Metabolism	0.0651658	0.0590293	27.7744	27.6648	0.109628	0.520037	14	14	14	39.4	39.4	39.4	38.39	0	35.144	1187000000	53	14	14	14	1	9	9	9	12	11	11	9	9	9	12	11	11	9	9	9	12	11	11	327	327	1	68	NaN	NaN	NaN	NaN
Q7V0N8	Bifunctional protein HldE	Central Metabolism	0.0167244	0.0160816	26.4835	26.4554	0.028108	0.744327	13	13	13	36.9	36.9	36.9	42.555	0	29.973	415530000	50	13	13	13	1	7	8	10	10	9	11	7	8	10	10	9	11	7	8	10	10	9	11	366	366	1	59	NaN	NaN	NaN	NaN
Q7V0N9	Putative phosphoheptose isomerase	Central Metabolism	0.0570184	0.0542341	26.9529	26.9043	0.0485522	0.829262	16	16	16	47.6	47.6	47.6	35.692	0	105.97	8521400000	110	16	16	16	1	13	10	13	12	11	12	13	10	13	12	11	12	13	10	13	12	11	12	315	315	1	112	NaN	NaN	NaN	NaN
Q7V0P0	Putative sugar-phosphate nucleotidyl transferase	Central Metabolism	0.0150203	0.0176401	25.2625	25.5241	-0.261602	0.214222	18	18	18	44.6	44.6	44.6	55.472	0	128.28	3798200000	101	18	18	18	1	16	16	18	15	16	15	16	16	18	15	16	15	16	16	18	15	16	15	500	500	1	120	NaN	NaN	NaN	NaN
Q7V0P1	Uncharacterized protein	Uncharacterized	0.00602715	0.00627964	24.7143	24.8015	-0.087155	0.401508	8	8	8	51.2	51.2	51.2	22.543	0	51.044	2396000000	48	8	8	8	1	7	8	8	7	7	8	7	8	8	7	7	8	7	8	8	7	7	8	203	203	1	56	NaN	NaN	NaN	NaN
Q7V0P2	D,D-heptose 1,7-bisphosphate phosphatase	Central Metabolism	0.015531	0.0140544	25.166	25.05	0.115972	0.236473	6	6	6	29.3	29.3	29.3	27.143	0	19.103	976390000	44	6	6	6	1	6	6	6	6	6	6	6	6	6	6	6	6	6	6	6	6	6	6	239	239	1	41	NaN	NaN	NaN	NaN
Q7V0P3	Glycosyl transferases group 1	Central Metabolism	0.0390063	0.0336987	27.3254	27.1475	0.177872	0.468737	13	13	12	36.4	36.4	34.6	45.846	0	44.639	873960000	62	13	13	12	1	12	12	12	10	10	11	12	12	12	10	10	11	12	12	11	10	10	11	407	407	1	73	NaN	NaN	NaN	NaN
Q7V0P4	Uncharacterized protein	Uncharacterized	0.0549502	0.0514025	27.0795	27.0071	0.0723337	0.780928	6	6	6	33.8	33.8	33.8	24.726	0	48.532	741730000	29	6	6	6	1	5	5	5	5	6	6	5	5	5	5	6	6	5	5	5	5	6	6	216	216	1	42	NaN	NaN	NaN	NaN
Q7V0P6	Putative nucleotide sugar epimerase	Other	0.0257679	0.0245871	26.5536	26.5155	0.0381444	0.811058	15	15	15	48.7	48.7	48.7	44.483	0	162.51	5788900000	124	15	15	15	1	14	14	15	15	14	15	14	14	15	15	14	15	14	14	15	15	14	15	386	386	1	122	NaN	NaN	NaN	NaN
Q7V0P7	UDP-glucose-4-epimerase	Central Metabolism	0.0116207	0.0103108	25.49	25.3523	0.1377	0.478857	8	8	8	46.1	46.1	46.1	27.07	0	69.838	2030700000	59	8	8	8	1	8	8	8	8	8	8	8	8	8	8	8	8	8	8	8	8	8	8	230	230	1	64	NaN	NaN	NaN	NaN
Q7V0P8	GDP-mannose 4,6-dehydratase	Central Metabolism	0.0456021	0.041344	27.4435	27.3318	0.111743	0.270779	15	15	15	63.9	63.9	63.9	38.514	0	116.27	5892000000	171	15	15	15	1	15	15	15	13	15	15	15	15	15	13	15	15	15	15	15	13	15	15	341	341	1	178	NaN	NaN	NaN	NaN
Q7V0P9	GDP-L-fucose synthase	Central Metabolism	0.00850385	0.00833575	24.8478	24.8478	2.54313e-05	1	17	17	17	47.7	47.7	47.7	41.307	0	79.435	1895300000	94	17	17	17	1	15	16	17	15	14	14	15	16	17	15	14	14	15	16	17	15	14	14	363	363	1	123	NaN	NaN	NaN	NaN
Q7V0Q0	Uncharacterized protein	Uncharacterized	0.00270901	0.00236996	23.7448	23.5645	0.180243	0.667554	21	21	21	70.6	70.6	70.6	40.893	0	164.56	6221800000	110	21	21	21	1	13	17	17	17	15	16	13	17	17	17	15	16	13	17	17	17	15	16	357	357	1	133	NaN	NaN	NaN	NaN
Q7V0Q1	NDP-hexose 3,4-dehydratase	Central Metabolism	0.0747094	0.0721025	28.3172	28.2941	0.0230687	0.815203	8	8	8	20.8	20.8	20.8	35.864	0	29.449	759980000	40	8	8	8	1	7	8	7	7	7	6	7	8	7	7	7	6	7	8	7	7	7	6	317	317	1	47	NaN	NaN	NaN	NaN
Q7V0Q2	Glucose-1-phosphate cytidylyltransferase	Central Metabolism	0.0498078	0.0502775	27.0856	27.1281	-0.0425529	0.746012	3	3	3	6.9	6.9	6.9	53.638	0	4.5608	150590000	8	3	3	3	1	3	2	2	2	2	1	3	2	2	2	2	1	3	2	2	2	2	1	463	463	1	12	NaN	NaN	NaN	NaN
Q7V0Q3	CDP-glucose 4,6-dehydratase	Central Metabolism	0.0176553	0.0160229	26.0871	25.9758	0.111315	0.408364	24	24	24	47.1	47.1	47.1	45.151	0	225.72	20862000000	246	24	24	24	1	23	24	24	24	24	23	23	24	24	24	24	23	23	24	24	24	24	23	399	399	1	240	NaN	NaN	NaN	NaN
Q7V0Q4	Possible nucleoside-diphosphate-sugar epimerase	Other	0.0480412	0.049033	27.1891	27.247	-0.0579611	0.615493	19	19	19	58	58	58	29.166	0	103.12	5960000000	127	19	19	19	1	19	18	17	16	16	17	19	18	17	16	16	17	19	18	17	16	16	17	255	255	1	165	NaN	NaN	NaN	NaN
Q7V0Q5	Putative CDP-tyvelose-2-epimerase (RfbE)	Other	0.0273646	0.026095	26.6743	26.6345	0.0398159	0.704549	24	24	24	69.4	69.4	69.4	41.706	0	124.4	3815700000	130	24	24	24	1	20	20	20	21	19	20	20	20	20	21	19	20	20	20	20	21	19	20	360	360	1	154	NaN	NaN	NaN	NaN
Q7V0Q6	Glycosyl transferase, family 2	Central Metabolism	0.0370434	0.0383665	26.9738	27.0517	-0.0779902	0.431647	12	12	12	54.2	54.2	54.2	32.149	0	79.744	2785800000	70	12	12	12	1	9	10	10	10	10	11	9	10	10	10	10	11	9	10	10	10	10	11	284	284	1	88	NaN	NaN	NaN	NaN
Q7V0Q7	Uncharacterized protein	Uncharacterized	0.00222893	0.00233937	23.1396	23.2364	-0.0967941	0.604611	18	18	18	46.1	46.1	46.1	39.867	0	138.02	4605000000	118	18	18	18	1	16	17	14	18	15	13	16	17	14	18	15	13	16	17	14	18	15	13	349	349	1	142	NaN	NaN	NaN	NaN
Q7V0Q8	Uncharacterized protein	Uncharacterized	0.00456693	0.0036876	24.4313	24.1876	0.243715	0.756735	14	14	14	33.8	33.8	33.8	36.041	0	47.133	2712400000	86	14	14	14	1	14	14	13	12	12	14	14	14	13	12	12	14	14	14	13	12	12	14	317	317	1	97	NaN	NaN	NaN	NaN
Q7V0Q9	Uncharacterized protein	Uncharacterized	0.0124168	0.0108647	25.9052	25.7437	0.161489	0.586455	2	2	2	5.7	5.7	5.7	42.185	0	10.142	103070000	13	2	2	2	1	2	2	2	2	2	2	2	2	2	2	2	2	2	2	2	2	2	2	370	370	1	13	NaN	NaN	NaN	NaN
Q7V0R0	GDP-mannose pyrophosphorylase	Central Metabolism	0.079528	0.0734678	28.6894	28.6025	0.0869013	0.367357	5	5	5	12.5	12.5	12.5	52.582	0	6.4137	295360000	20	5	5	5	1	3	4	3	3	2	4	3	4	3	3	2	4	3	4	3	3	2	4	457	457	1	25	NaN	NaN	NaN	NaN
Q7V0R1	Uncharacterized protein	Uncharacterized	0.0123574	0.0130486	24.8471	24.9534	-0.10623	0.556231	6	6	6	15.9	15.9	15.9	52.197	0	25.584	889620000	34	6	6	6	1	4	4	5	6	4	4	4	4	5	6	4	4	4	4	5	6	4	4	453	453	1	36	NaN	NaN	NaN	NaN
Q7V0R3	Ribosomal RNA small subunit methyltransferase I	Basic Cellular Processes	0.0169496	0.0154016	25.7009	25.5919	0.109002	0.302533	30	30	30	64.7	64.7	64.7	54.797	0	242.97	13440000000	230	30	30	30	1	30	27	29	27	27	25	30	27	29	27	27	25	30	27	29	27	27	25	485	485	1	238	NaN	NaN	NaN	NaN
Q7V0R4	CysQ protein homolog	Other	0.046706	0.0447116	27.2841	27.2548	0.0292969	0.916147	9	9	9	37.2	37.2	37.2	25.316	0	39.053	809630000	45	9	9	9	1	9	9	8	9	8	8	9	9	8	9	8	8	9	9	8	9	8	8	218	218	1	56	NaN	NaN	NaN	NaN
Q7V0R5	Polyribonucleotide nucleotidyltransferase	Basic Cellular Processes	0.200087	0.192413	30.5926	30.5633	0.0292772	0.808806	13	13	13	48.1	48.1	48.1	31.919	0	92.914	2203400000	91	13	13	13	1	12	13	13	13	12	11	12	13	13	13	12	11	12	13	13	13	12	11	287	287	1	102	NaN	NaN	NaN	NaN
Q7V0R6	Zinc metalloprotease	Basic Cellular Processes	0.0632597	0.069965	27.9253	28.094	-0.168626	0.434333	15	15	15	46.3	46.3	46.3	35.752	0	140.54	3496000000	87	15	15	15	1	13	13	14	14	13	14	13	13	14	14	13	14	13	13	14	14	13	14	313	313	1	97	NaN	NaN	NaN	NaN
Q7V0R7	Serine--tRNA ligase	Basic Cellular Processes	0.116018	0.110143	29.0396	28.9935	0.0461311	0.416794	60	60	60	75.5	75.5	75.5	78.667	0	323.31	138130000000	910	60	60	60	1	56	53	53	52	54	57	56	53	53	52	54	57	56	53	53	52	54	57	721	721	1	871	NaN	NaN	NaN	NaN
Q7V0R8	Membrane protein insertase YidC	Membrane Transport	0.0322526	0.0389437	26.9584	27.3317	-0.373235	0.664577	11	11	11	40.1	40.1	40.1	39.077	0	111.76	5113600000	93	11	11	11	1	10	10	11	10	11	11	10	10	11	10	11	11	10	10	11	10	11	11	359	359	1	85	NaN	NaN	NaN	NaN
Q7V0R9	Uncharacterized protein	Uncharacterized	0.0786528	0.0862928	26.8458	27.0115	-0.165746	0.466	33	33	33	61.1	61.1	61.1	48.081	0	323.31	11642000000	224	33	33	33	1	30	31	30	30	32	32	30	31	30	30	32	32	30	31	30	30	32	32	424	424	1	268	NaN	NaN	NaN	NaN
Q7V0S2	Uncharacterized protein	Uncharacterized	0.0681034	0.0723148	27.121	27.2355	-0.11448	0.250679	17	17	17	41.7	41.7	41.7	41.262	0	59.988	5496600000	119	17	17	17	1	12	13	15	14	14	16	12	13	15	14	14	16	12	13	15	14	14	16	379	379	1	115	NaN	NaN	NaN	NaN
Q7V0S3	Chorismate mutase AroH	Central Metabolism	0.0202625	0.0149555	24.7797	24.2854	0.494268	0.571173	12	12	12	63.5	63.5	63.5	15.508	0	71.672	3600000000	85	12	12	12	1	9	9	8	10	10	11	9	9	8	10	10	11	9	9	8	10	10	11	137	137	1	90	NaN	NaN	NaN	NaN
Q7V0S4	Signal peptide peptidase SppA (Protease IV)	Membrane Transport	0.150702	0.16192	28.7612	28.8928	-0.131571	0.156471	10	10	10	47.1	47.1	47.1	22.215	0	57.696	5265600000	80	10	10	10	1	10	10	9	10	10	9	10	10	9	10	10	9	10	10	9	10	10	9	191	191	1	78	NaN	NaN	NaN	NaN
Q7V0S6	Glycosyl transferases group 1	Central Metabolism	0.00823837	0.00778889	25.0004	24.9499	0.0505066	0.818959	2	2	2	26	26	26	14.285	0	8.3066	343460000	12	2	2	2	1	2	2	2	2	2	2	2	2	2	2	2	2	2	2	2	2	2	2	127	127	1	20	NaN	NaN	NaN	NaN
Q7V0S7	Uncharacterized protein	Uncharacterized	0.00167249	0.00225002	23.3451	23.8512	-0.506136	0.626627	22	22	22	68.4	68.4	68.4	29.686	0	129.34	26204000000	236	22	22	22	1	20	21	20	22	21	20	20	21	20	22	21	20	20	21	20	22	21	20	269	269	1	204	NaN	NaN	NaN	NaN
Q7V0S8	Uncharacterized protein	Uncharacterized	0.00385947	0.00378658	23.4263	23.4018	0.0244389	0.980021	12	12	12	38.2	38.2	38.2	40.487	0	62.072	994990000	59	12	12	12	1	9	11	11	6	9	8	9	11	11	6	9	8	9	11	11	6	9	8	364	364	1	65	NaN	NaN	NaN	NaN
Q7V0S9	Uncharacterized protein	Uncharacterized	0.0111803	0.0141037	23.1273	23.4999	-0.372634	0.472724	3	3	3	6	6	6	68.722	0	9.7797	138750000	16	3	3	3	1	1	2	3	3	2	3	1	2	3	3	2	3	1	2	3	3	2	3	601	601	1	14	NaN	NaN	NaN	NaN
Q7V0T2	Flavodoxin	Oxidative Stress	1.49946	1.43631	31.4467	31.4114	0.0353057	0.889446	2	2	2	8.8	8.8	8.8	28.613	0	5.3106	96849000	12	2	2	2	1	2	2	2	2	2	2	2	2	2	2	2	2	2	2	2	2	2	2	261	261	1	12	NaN	NaN	NaN	NaN
Q7V0T3	Uncharacterized protein	Uncharacterized	0.0598725	0.0616972	27.1108	27.1843	-0.0735594	0.689155	1	1	1	14.9	14.9	14.9	8.6069	0	15.248	126060000	12	1	1	1	1	1	1	1	1	1	1	1	1	1	1	1	1	1	1	1	1	1	1	74	74	1	12	NaN	NaN	NaN	NaN
Q7V0T4	Uncharacterized protein	Uncharacterized	0.0225483	0.0201046	24.2868	24.1511	0.135609	0.457378	21	21	21	99.4	99.4	99.4	18.892	0	323.31	101560000000	405	21	21	21	1	21	21	21	21	21	21	21	21	21	21	21	21	21	21	21	21	21	21	174	174	1	396	NaN	NaN	NaN	NaN
Q7V0T5	Uncharacterized protein	Uncharacterized	0.00382334	0.00424266	23.121	23.2813	-0.16032	0.807941	9	9	9	39.8	39.8	39.8	25.372	0	83.624	2885000000	67	9	9	9	1	9	9	9	9	8	8	9	9	9	9	8	8	9	9	9	9	8	8	216	216	1	72	NaN	NaN	NaN	NaN
Q7V0T6	Macrophage migration inhibitory factor family	Basic Cellular Processes	0.150914	0.138127	27.4311	27.3677	0.0633952	0.951775	2	2	2	37	37	37	9.5608	0	29.2	275600000	19	2	2	2	1	2	2	2	2	2	2	2	2	2	2	2	2	2	2	2	2	2	2	81	81	1	20	NaN	NaN	NaN	NaN
Q7V0T7	Uncharacterized protein	Uncharacterized	0.0499858	0.0558551	26.0998	26.2966	-0.196831	0.528695	5	5	5	18.7	18.7	18.7	25.433	0	15.1	80523000	7	5	5	5	1	2	2	4	2	3	2	2	2	4	2	3	2	2	2	4	2	3	2	214	214	1	15	NaN	NaN	NaN	NaN
Q7V0T8	Glycine--tRNA ligase alpha subunit	Basic Cellular Processes	0.0478279	0.0427158	27.2061	27.0734	0.132678	0.417612	5	5	5	41.8	41.8	41.8	12.593	0	37.91	2524200000	38	5	5	5	1	5	5	5	5	5	5	5	5	5	5	5	5	5	5	5	5	5	5	110	110	1	44	NaN	NaN	NaN	NaN
Q7V0T9	Putative iron ABC transporter, substrate binding protein	Membrane Transport	5.59042	6.24618	34.3123	34.4988	-0.186517	0.220554	6	6	6	41.9	41.9	41.9	14.087	0	24.377	1489200000	43	6	6	6	1	6	6	6	6	6	6	6	6	6	6	6	6	6	6	6	6	6	6	129	129	1	47	NaN	NaN	NaN	NaN
Q7V0U0	Uncharacterized protein	Uncharacterized	0.0117183	0.0104364	26.2384	26.0992	0.139174	0.217677	21	21	21	67.1	67.1	67.1	33.89	0	108.07	7339300000	162	21	21	21	1	20	20	18	19	18	18	20	20	18	19	18	18	20	20	18	19	18	18	289	289	1	179	NaN	NaN	NaN	NaN
Q7V0U2	Cobyric acid synthase	Central Metabolism	0.0235883	0.0238359	27.0034	27.0488	-0.0453835	0.78187	52	52	52	88.8	88.8	88.8	38.209	0	323.31	911060000000	1723	52	52	52	1	48	46	45	46	46	51	48	46	45	46	46	51	48	46	45	46	46	51	340	340	1	1806	NaN	NaN	NaN	NaN
Q7V0U3	Maf-like protein PMM1159	Other	0.0191592	0.0203192	25.4084	25.5265	-0.118165	0.605993	21	21	21	46.5	46.5	46.5	68.493	0	184.09	3070500000	135	21	21	21	1	18	18	19	17	19	21	18	18	19	17	19	21	18	18	19	17	19	21	602	602	1	146	NaN	NaN	NaN	NaN
Q7V0U6	Photosystem I assembly protein Ycf4	Photosynthesis	0.0554977	0.0667305	26.7778	27.0731	-0.29533	0.226286	19	19	19	41.8	41.8	41.8	57.57	0	137.47	3915200000	122	19	19	19	1	18	17	18	17	17	16	18	17	18	17	17	16	18	17	18	17	17	16	509	509	1	153	NaN	NaN	NaN	NaN
Q7V0U8	Acetolactate synthase small subunit	Central Metabolism	0.263901	0.273919	28.9409	29.0226	-0.0816339	0.233592	6	6	6	50.5	50.5	50.5	23.536	0	58.098	976850000	25	6	6	6	1	4	4	4	4	5	5	4	4	4	4	5	5	4	4	4	4	5	5	208	208	1	26	NaN	NaN	NaN	NaN
Q7V0U9	Predicted alpha/beta hydrolase superfamily protein	Other	0.00902879	0.00842003	25.0371	24.9629	0.0741736	0.66438	7	7	7	28.6	28.6	28.6	20.471	0	46.117	2534300000	55	7	7	7	1	7	7	7	7	7	7	7	7	7	7	7	7	7	7	7	7	7	7	185	185	1	59	NaN	NaN	NaN	NaN
Q7V0V0	Putative chaperon-like protein for quinone binding in photosystem II	Photosynthesis	0.220571	0.208629	29.558	29.5088	0.0492624	0.757503	14	14	14	84.5	84.5	84.5	19.072	0	218.28	14918000000	192	14	14	14	1	13	13	14	14	14	14	13	13	14	14	14	14	13	13	14	14	14	14	174	174	1	200	NaN	NaN	NaN	NaN
Q7V0V1	Translation initiation factor IF-1	Basic Cellular Processes	0.107537	0.0999505	26.6567	26.5844	0.0722745	0.753781	5	5	5	20.9	20.9	20.9	39.004	0	16.187	438620000	15	5	5	5	1	3	4	3	3	3	4	3	4	3	3	3	4	3	4	3	3	3	4	340	340	1	23	NaN	NaN	NaN	NaN
Q7V0V2	Thioredoxin reductase	Oxidative Stress	0.0273001	0.0283847	27.0622	27.1474	-0.0851542	0.66843	30	30	30	73.4	73.4	73.4	36.404	0	261.84	18866000000	245	30	30	30	1	26	27	27	26	29	29	26	27	27	26	29	29	26	27	27	26	29	29	320	320	1	279	NaN	NaN	NaN	NaN
Q7V0V4	Possible EF-1 guanine nucleotide exchange doma	Basic Cellular Processes	0.00697281	0.00658016	23.522	23.7676	-0.245562	0.916618	3	3	3	31.8	31.8	31.8	9.735	0	23.162	1327500000	37	3	3	3	1	3	3	3	3	3	3	3	3	3	3	3	3	3	3	3	3	3	3	88	88	1	37	NaN	NaN	NaN	NaN
Q7V0V5	Putative nicotinamide nucleotide transhydrogenase, subunit alpha 1 (A1)	Central Metabolism	0.177251	0.170778	29.4768	29.4529	0.0238425	0.820252	26	26	26	70.1	70.1	70.1	50.068	0	252.67	8769500000	235	26	26	26	1	25	26	24	25	24	26	25	26	24	25	24	26	25	26	24	25	24	26	458	458	1	224	NaN	NaN	NaN	NaN
Q7V0V7	NAD(P) transhydrogenase subunit beta	Energy Production and Conversion	0.0680855	0.0605556	28.4438	28.3028	0.14098	0.308299	3	3	3	17.2	17.2	17.2	21.979	0	12.256	128900000	14	3	3	3	1	3	1	2	2	3	2	3	1	2	2	3	2	3	1	2	2	3	2	192	192	1	15	NaN	NaN	NaN	NaN
Q7V0V8	Uncharacterized protein	Uncharacterized	0.00467826	0.00386118	24.0305	23.917	0.113529	0.951599	34	34	34	85.1	85.1	85.1	39.873	0	323.31	41248000000	493	34	34	34	1	33	31	33	33	31	34	33	31	33	33	31	34	33	31	33	33	31	34	376	376	1	441	NaN	NaN	NaN	NaN
Q7V0W0	1-deoxy-D-xylulose 5-phosphate reductoisomerase	Central Metabolism	0.0128073	0.011322	25.7766	25.64	0.136611	0.706328	19	19	19	36	36	36	50.071	0	173.37	13291000000	213	19	19	19	1	19	18	18	18	19	18	19	18	18	18	19	18	19	18	18	18	19	18	478	478	1	229	NaN	NaN	NaN	NaN
Q7V0W1	Cysteine--tRNA ligase	Basic Cellular Processes	0.0118187	0.011204	25.9571	25.9085	0.048535	0.808603	3	3	3	10.2	10.2	10.2	41.243	0	8.0079	168210000	11	3	3	3	1	3	3	1	2	2	1	3	3	1	2	2	1	3	3	1	2	2	1	363	363	1	13	NaN	NaN	NaN	NaN
Q7V0W2	DNA polymerase I	Basic Cellular Processes	0.00893859	0.00867766	26.5447	26.5298	0.014883	0.917231	11	11	11	31.7	31.7	31.7	44.275	0	40.89	1131900000	57	11	11	11	1	8	11	10	10	7	9	8	11	10	10	7	9	8	11	10	10	7	9	404	404	1	64	NaN	NaN	NaN	NaN
Q7V0W3	Possible membrane fusion protein	Membrane Transport	0.0412687	0.0381928	27.283	27.201	0.0820007	0.453111	23	23	23	45.5	45.5	45.5	56.872	0	185.01	2674200000	126	23	23	23	1	19	21	20	20	19	20	19	21	20	20	19	20	19	21	20	20	19	20	492	492	1	154	NaN	NaN	NaN	NaN
Q7V0W4	Ribosome-binding ATPase YchF	Basic Cellular Processes	0.0222781	0.0204696	26.4351	26.3414	0.0937398	0.292238	43	43	43	47.6	47.6	47.6	110.79	0	225.91	6138000000	263	43	43	43	1	38	38	39	39	37	40	38	38	39	39	37	40	38	38	39	39	37	40	976	976	1	310	NaN	NaN	NaN	NaN
Q7V0W6	Possible high light inducible protein	Photosynthesis	0.0283527	0.0677664	24.0039	25.6516	-1.64776	0.368847	26	26	26	64.6	64.6	64.6	39.59	0	263.25	9231800000	190	26	26	26	1	21	24	22	22	24	21	21	24	22	22	24	21	21	24	22	22	24	21	353	353	1	200	NaN	NaN	NaN	NaN
Q7V0W8	Uncharacterized protein	Uncharacterized	0.00631401	0.00636261	25.2593	25.2992	-0.0398655	0.78275	18	18	18	65	65	65	39.944	0	108.54	3060900000	110	18	18	18	1	16	16	17	14	17	15	16	16	17	14	17	15	16	16	17	14	17	15	363	363	1	124	NaN	NaN	NaN	NaN
Q7V0X3	Uncharacterized protein	Uncharacterized	0.00282917	0.00259065	24.3385	24.2445	0.0940272	0.753566	2	2	2	51.5	51.5	51.5	7.4633	0	10.859	530670000	16	2	2	2	1	2	2	2	2	2	2	2	2	2	2	2	2	2	2	2	2	2	2	68	68	1	17	NaN	NaN	NaN	NaN
Q7V0X5	Adenine phosphoribosyltransferase	Central Metabolism	0.027793	0.0254373	25.6629	25.5686	0.0943871	0.755179	21	21	21	43.6	43.6	43.6	65.458	0	164.24	2403200000	123	21	21	21	1	18	17	17	16	19	19	18	17	17	16	19	19	18	17	17	16	19	19	567	567	1	152	NaN	NaN	NaN	NaN
Q7V0X6	Possible porin	Membrane Transport	0.116753	0.131954	28.8808	29.0974	-0.216642	0.595189	8	8	8	12.4	12.4	12.4	77.651	0	17.825	421750000	24	8	8	8	1	5	6	7	6	7	5	5	6	7	6	7	5	5	6	7	6	7	5	671	671	1	42	NaN	NaN	NaN	NaN
Q7V0X7	Sulfotransferase:TPR repeat	Central Metabolism	0.0105967	0.0102633	26.1193	26.1016	0.0177549	0.886155	13	13	13	61.4	61.4	61.4	19.114	0	146.47	2529800000	96	13	13	13	1	11	13	12	12	13	10	11	13	12	12	13	10	11	13	12	12	13	10	171	171	1	108	NaN	NaN	NaN	NaN
Q7V0X8	Possible porin	Membrane Transport	0.0142623	0.0120241	25.8529	25.625	0.227815	0.5886	4	4	3	16	16	14.2	38.864	0	71.374	4805000000	24	4	4	3	1	3	4	3	3	3	3	3	4	3	3	3	3	2	3	2	2	2	2	381	381	1	24	NaN	NaN	NaN	NaN
Q7V0X9	Putative carotenoid isomerase	Central Metabolism	0.01968	0.0187276	26.8104	26.7674	0.0430361	0.489066	17	17	17	30.7	30.7	30.7	72.142	0	112.07	1582900000	76	17	17	17	1	14	14	17	15	14	12	14	14	17	15	14	12	14	14	17	15	14	12	613	613	1	97	NaN	NaN	NaN	NaN
Q7V0Y1	Two-component response regulator	Other	0.317919	0.327064	29.7015	29.769	-0.0675068	0.745304	1	1	1	5	5	5	38.444	0	13.245	516580000	12	1	1	1	1	1	1	1	1	1	1	1	1	1	1	1	1	1	1	1	1	1	1	380	380	1	12	NaN	NaN	NaN	NaN
Q7V0Y3	Glutaredoxin	Oxidative Stress	0.0451075	0.0391821	25.6681	25.5137	0.154409	0.790161	25	25	25	44.8	44.8	44.8	59.554	0	117.72	6347200000	158	25	25	25	1	21	20	21	22	20	22	21	20	21	22	20	22	21	20	21	22	20	22	533	533	1	186	NaN	NaN	NaN	NaN
Q7V0Y5	Uncharacterized protein	Uncharacterized	0.167535	0.193471	28.3896	28.6252	-0.235682	0.112	18	18	18	86.9	86.9	86.9	26.549	0	302.23	22369000000	206	18	18	18	1	17	17	18	18	18	18	17	17	18	18	18	18	17	17	18	18	18	18	245	245	1	201	NaN	NaN	NaN	NaN
Q7V0Y7	Pyridoxine 5-phosphate synthase	Central Metabolism	0.0461109	0.0482564	26.8745	26.9692	-0.0947177	0.416669	4	4	4	51.4	51.4	51.4	12.034	0	31.786	1766700000	56	4	4	4	1	3	3	3	3	4	3	3	3	3	3	4	3	3	3	3	3	4	3	107	107	1	59	NaN	NaN	NaN	NaN
Q7V0Y8	Uncharacterized protein	Uncharacterized	0.143278	0.152392	27.3312	27.4463	-0.115044	0.410326	12	12	12	44.9	44.9	44.9	20.83	0	101.12	6582900000	81	12	12	12	1	10	11	12	11	11	12	10	11	12	11	11	12	10	11	12	11	11	12	187	187	1	92	NaN	NaN	NaN	NaN
Q7V0Y9	Possible exodeoxyribonuclease V subunit C 125 kD polypeptide	Basic Cellular Processes	0.00105766	0.0009442	23.5773	23.4349	0.14233	0.64532	20	20	20	52.1	52.1	52.1	26.666	0	166.18	7279100000	177	20	20	20	1	19	19	18	20	20	20	19	19	18	20	20	20	19	19	18	20	20	20	238	238	1	191	NaN	NaN	NaN	NaN
Q7V0Z1	Possible UvrD/REP helicase subunit B	Basic Cellular Processes	0.00441262	0.00463286	25.8309	25.9332	-0.102301	0.633589	7	7	7	55.2	55.2	55.2	12.256	0	58.647	3106800000	48	7	7	7	1	6	7	7	7	7	6	6	7	7	7	7	6	6	7	7	7	7	6	105	105	1	65	NaN	NaN	NaN	NaN
Q7V0Z2	Possible exodeoxyribonuclease V 67 kD polypeptide	Basic Cellular Processes	0.00439188	0.00472089	24.7166	24.8538	-0.137228	0.66256	13	13	13	14.8	14.8	14.8	125.03	0	42.371	380630000	55	13	13	13	1	10	7	8	8	7	8	10	7	8	8	7	8	10	7	8	8	7	8	1057	1057	1	51	NaN	NaN	NaN	NaN
Q7V0Z3	Putative ATP-dependent RNA helicase	Basic Cellular Processes	0.0070316	0.00760147	25.4772	25.6165	-0.13931	0.260683	14	14	14	11.7	11.7	11.7	141.63	0	30.669	761100000	52	14	14	14	1	9	13	9	11	10	10	9	13	9	11	10	10	9	13	9	11	10	10	1209	1209	1	64	NaN	NaN	NaN	NaN
Q7V0Z5	ABC transporter, multidrug efflux family	Membrane Transport	0.0119951	0.0117581	26.2415	26.2422	-0.000729879	1	14	14	14	28.5	28.5	28.5	64.976	0	87.986	843380000	59	14	14	14	1	11	10	10	12	9	9	11	10	10	12	9	9	11	10	10	12	9	9	562	562	1	61	NaN	NaN	NaN	NaN
Q7V0Z6	Photosystem II oxygen evolving complex protein PsbP	Photosynthesis	0.0937516	0.0920911	27.5363	27.536	0.000321706	1	28	28	28	49	49	49	67.47	0	237.67	3550500000	165	28	28	28	1	24	26	26	26	25	27	24	26	26	26	25	27	24	26	26	26	25	27	592	592	1	188	NaN	NaN	NaN	NaN
Q7V0Z7	Recombination protein RecR	Basic Cellular Processes	0.0404215	0.046371	26.4244	26.6533	-0.228868	0.325118	16	16	16	33.6	33.6	33.6	66.538	0	170.85	2634800000	80	16	16	16	1	15	13	13	12	12	10	15	13	13	12	12	10	15	13	13	12	12	10	590	590	1	96	NaN	NaN	NaN	NaN
Q7V0Z9	Uncharacterized protein	Uncharacterized	0.00913874	0.00913738	24.0548	24.0664	-0.0115827	0.990374	6	6	6	44.3	44.3	44.3	20.77	0	32.47	3651300000	40	6	6	6	1	5	5	6	6	5	5	5	5	6	6	5	5	5	5	6	6	5	5	185	185	1	37	NaN	NaN	NaN	NaN
Q7V101	Biotin synthase	Central Metabolism	0.00350256	0.00357373	23.6415	23.7035	-0.0620365	0.888221	12	12	12	68.3	68.3	68.3	22.226	0	64.474	2635900000	81	12	12	12	1	8	8	10	8	10	8	8	8	10	8	10	8	8	8	10	8	10	8	199	199	1	88	NaN	NaN	NaN	NaN
Q7V102	Isoprenyl transferase	Central Metabolism	0.0126346	0.0128589	25.1982	25.2537	-0.0555751	0.760444	4	4	4	22.9	22.9	22.9	19.428	0	8.568	309420000	25	4	4	4	1	4	4	4	4	4	4	4	4	4	4	4	4	4	4	4	4	4	4	170	170	1	28	NaN	NaN	NaN	NaN
Q7V103	Diadenylate cyclase	Basic Cellular Processes	0.0290667	0.0285454	26.5205	26.5268	-0.00631841	0.983276	7	7	7	24.8	24.8	24.8	37.719	0	10.472	190900000	24	7	7	7	1	2	5	5	5	6	3	2	5	5	5	6	3	2	5	5	5	6	3	335	335	1	26	NaN	NaN	NaN	NaN
Q7V104	Diaminopimelate decarboxylase	Central Metabolism	0.0455223	0.0421542	27.7983	27.7156	0.0827649	0.312	8	8	8	34.6	34.6	34.6	30.965	0	21.706	847760000	30	8	8	8	1	8	7	6	7	6	7	8	7	6	7	6	7	8	7	6	7	6	7	272	272	1	45	NaN	NaN	NaN	NaN
Q7V106	ClpC	Basic Cellular Processes	0.0606419	0.0594638	29.094	29.0939	9.91821e-05	1	13	13	13	44.6	44.6	44.6	32.782	0	116.47	2894000000	67	13	13	13	1	13	13	13	13	13	13	13	13	13	13	13	13	13	13	13	13	13	13	296	296	1	88	NaN	NaN	NaN	NaN
Q7V107	Putative glycerol dehydrogenase	Central Metabolism	0.00428133	0.00387678	24.058	23.9424	0.115684	0.574488	30	30	30	70.2	70.2	70.2	50.648	0	159.56	11861000000	213	30	30	30	1	23	22	26	24	25	28	23	22	26	24	25	28	23	22	26	24	25	28	457	457	1	236	NaN	NaN	NaN	NaN
Q7V108	Orn/Lys/Arg decarboxylases family 1	Central Metabolism	0.0335876	0.0308628	27.3837	27.2879	0.0958036	0.634241	67	67	65	77.7	77.7	74.9	93.426	0	323.31	77257000000	921	67	67	65	1	65	65	66	67	67	67	65	65	66	67	67	67	63	63	64	65	65	65	842	842	1	836	NaN	NaN	NaN	NaN
Q7V109	Possible kinase	Central Metabolism	0.0132297	0.0130016	26.2869	26.2915	-0.00458845	0.991451	6	6	6	20.1	20.1	20.1	40.597	0	22.785	330380000	23	6	6	6	1	4	5	6	4	5	3	4	5	6	4	5	3	4	5	6	4	5	3	364	364	1	27	NaN	NaN	NaN	NaN
Q7V110	4-alpha-glucanotransferase	Central Metabolism	0.0634814	0.0582179	28.4249	28.3285	0.0963993	0.235277	15	15	15	35.7	35.7	35.7	52.561	0	41.362	2723500000	41	15	15	15	1	10	11	10	9	10	11	10	11	10	9	10	11	10	11	10	9	10	11	465	465	1	68	NaN	NaN	NaN	NaN
Q7V111	Ribose-phosphate pyrophosphokinase	Central Metabolism	0.0496228	0.0494544	27.4576	27.4808	-0.0232417	0.725287	22	22	22	47.5	47.5	47.5	62.539	0	118.95	4400200000	145	22	22	22	1	21	21	21	21	21	21	21	21	21	21	21	21	21	21	21	21	21	21	552	552	1	160	NaN	NaN	NaN	NaN
Q7V112	Conserved hypothetical	Uncharacterized	0.0135856	0.0135868	24.7026	24.7374	-0.0347678	0.924829	26	26	26	57.1	57.1	57.1	59.327	0	159.22	7588000000	165	26	26	26	1	24	21	24	22	25	24	24	21	24	22	25	24	24	21	24	22	25	24	506	506	1	177	NaN	NaN	NaN	NaN
Q7V113	Adaptive-response sensory-kinase SasA	Basic Cellular Processes	0.0157754	0.0149133	25.9665	25.9191	0.0474021	0.858114	13	13	13	46.2	46.2	46.2	36.252	0	235.37	7315200000	142	13	13	13	1	12	13	13	13	13	13	12	13	13	13	13	13	12	13	13	13	13	13	331	331	1	134	NaN	NaN	NaN	NaN
Q7V115	Ferredoxin-NADP oxidoreductase (FNR)	Photosynthesis	0.304673	0.289296	30.2364	30.1893	0.0470969	0.756288	8	8	8	50.6	50.6	50.6	22.239	0	41.451	395080000	47	8	8	8	1	5	5	6	5	7	4	5	5	6	5	7	4	5	5	6	5	7	4	180	180	1	42	NaN	NaN	NaN	NaN
Q7V116	Glucose-6-phosphate 1-dehydrogenase	Central Metabolism	0.0665185	0.0616129	28.4954	28.413	0.0824076	0.241284	17	17	17	44.6	44.6	44.6	42.571	0	67.853	1628300000	76	17	17	17	1	12	13	12	13	12	11	12	13	12	13	12	11	12	13	12	13	12	11	372	372	1	85	NaN	NaN	NaN	NaN
Q7V117	Putative glucose 6-phosphate dehydrogenase effector OpcA	Central Metabolism	0.041038	0.0371801	27.5678	27.4563	0.111487	0.487106	31	31	31	73.8	73.8	73.8	41.713	0	271.74	64992000000	510	31	31	31	1	28	29	28	28	30	30	28	29	28	28	30	30	28	29	28	28	30	30	370	370	1	519	NaN	NaN	NaN	NaN
Q7V119	Polyprenyl synthetase	Central Metabolism	0.0592996	0.0595139	27.5703	27.6064	-0.0360915	0.782622	40	40	40	80.3	80.3	80.3	57.963	0	323.31	17680000000	369	40	40	40	1	37	37	38	37	38	38	37	37	38	37	38	38	37	37	38	37	38	38	507	507	1	359	NaN	NaN	NaN	NaN
Q7V120	Uncharacterized protein	Uncharacterized	0.00629939	0.00622116	25.0438	25.0537	-0.00991694	0.974246	18	18	18	45	45	45	48.556	0	111.83	6003500000	125	18	18	18	1	15	15	16	16	16	15	15	15	16	16	16	15	15	15	16	16	16	15	433	433	1	144	NaN	NaN	NaN	NaN
Q7V121	2-isopropylmalate synthase	Central Metabolism	0.104864	0.0989982	29.2595	29.2043	0.0551917	0.365204	18	18	18	46	46	46	32.424	0	90.678	5669600000	123	18	18	18	1	17	18	17	17	17	16	17	18	17	17	17	16	17	18	17	17	17	16	300	300	1	148	NaN	NaN	NaN	NaN
Q7V122	Uncharacterized protein	Uncharacterized	0.0285813	0.0273844	27.3306	27.2987	0.0319443	0.916263	13	13	13	33.1	33.1	33.1	55.037	0	38.46	1187900000	64	13	13	13	1	11	10	12	8	10	8	11	10	12	8	10	8	11	10	12	8	10	8	490	490	1	78	NaN	NaN	NaN	NaN
Q7V123	Putative lycopene beta cyclase	Central Metabolism	0.0156677	0.0144363	26.0774	25.9853	0.0921491	0.650691	33	33	33	68.5	68.5	68.5	59.246	0	323.31	19042000000	283	33	33	33	1	28	29	30	31	31	30	28	29	30	31	31	30	28	29	30	31	31	30	546	546	1	289	NaN	NaN	NaN	NaN
Q7V124	DNA gyrase subunit A	Basic Cellular Processes	0.0345554	0.0346606	28.3235	28.3571	-0.0336316	0.755632	25	25	25	35.1	35.1	35.1	60.997	0	172.79	4046900000	160	25	25	25	1	22	22	23	23	21	23	22	22	23	23	21	23	22	22	23	23	21	23	527	527	1	162	NaN	NaN	NaN	NaN
Q7V125	Putative IMP dehydrogenase	Central Metabolism	0.0552733	0.0515038	27.8367	27.7643	0.0723248	0.619456	17	17	17	44.7	44.7	44.7	45.845	0	75.484	1903800000	75	17	17	17	1	15	14	14	15	15	15	15	14	14	15	15	15	15	14	14	15	15	15	403	403	1	103	NaN	NaN	NaN	NaN
Q7V126	Thioredoxin	Oxidative Stress	0.346796	0.362462	28.6319	28.7254	-0.0934925	0.574373	59	59	59	75.9	75.9	75.9	96.573	0	323.31	28479000000	488	59	59	59	1	53	56	59	55	58	56	53	56	59	55	58	56	53	56	59	55	58	56	867	867	1	534	NaN	NaN	NaN	NaN
Q7V127	Imidazole glycerol phosphate synthase subunit HisH	Central Metabolism	0.0548006	0.0538068	26.9069	26.91	-0.00314713	0.998224	30	30	30	70.3	70.3	70.3	40.999	0	267.64	19154000000	310	30	30	30	1	28	29	29	29	28	29	28	29	29	29	28	29	28	29	29	29	28	29	387	387	1	308	NaN	NaN	NaN	NaN
Q7V132	Crossover junction endodeoxyribonuclease RuvC	Basic Cellular Processes	0.0239782	0.027915	25.3321	25.5727	-0.240599	0.369636	10	10	10	96.3	96.3	96.3	11.61	0	137.4	14312000000	160	10	10	10	1	9	9	9	9	10	9	9	9	9	9	10	9	9	9	9	9	10	9	107	107	1	177	NaN	NaN	NaN	NaN
Q7V133	5-formyltetrahydrofolate cyclo-ligase	Central Metabolism	0.0183568	0.017797	25.1797	25.1625	0.0172056	0.975145	6	6	6	31.2	31.2	31.2	22.921	0	19.829	1310900000	32	6	6	6	1	6	6	5	5	6	5	6	6	5	5	6	5	6	6	5	5	6	5	205	205	1	39	NaN	NaN	NaN	NaN
Q7V134	Uncharacterized protein	Uncharacterized	0.0236384	0.0237314	25.1551	25.1905	-0.035347	0.742367	7	7	7	47.8	47.8	47.8	17.397	0	48.332	1131600000	59	7	7	7	1	7	7	7	7	7	7	7	7	7	7	7	7	7	7	7	7	7	7	157	157	1	59	NaN	NaN	NaN	NaN
Q7V135	Homoserine dehydrogenase	Central Metabolism	0.0331294	0.029225	27.2611	27.1097	0.151438	0.192851	7	7	7	35.7	35.7	35.7	21.746	0	11.287	483290000	34	7	7	7	1	4	4	4	5	7	5	4	4	4	5	7	5	4	4	4	5	7	5	185	185	1	30	NaN	NaN	NaN	NaN
Q7V137	ABC transporter, substrate binding protein, possibly oligopeptides	Membrane Transport	0.0568366	0.0556984	28.3138	28.3125	0.00125949	0.986453	9	9	9	61	61	61	16.058	0	23.832	891240000	50	9	9	9	1	7	7	8	8	8	9	7	7	8	8	8	9	7	7	8	8	8	9	141	141	1	55	NaN	NaN	NaN	NaN
Q7V139	Uncharacterized protein	Uncharacterized	0.00561793	0.00467464	24.9664	24.7263	0.240165	0.23872	15	15	15	36	36	36	46.956	0	250.69	6517200000	135	15	15	15	1	14	15	13	15	14	15	14	15	13	15	14	15	14	15	13	15	14	15	433	433	1	128	NaN	NaN	NaN	NaN
Q7V141	Conserved hypothetical	Uncharacterized	0.0179793	0.0202334	24.1302	24.358	-0.227774	0.724973	24	24	24	52.8	52.8	52.8	58.65	0	96.834	5998000000	157	24	24	24	1	22	23	22	21	22	21	22	23	22	21	22	21	22	23	22	21	22	21	523	523	1	161	NaN	NaN	NaN	NaN
Q7V144	Conserved hpothetical protein	Uncharacterized	0.0100404	0.0118487	24.2015	24.4699	-0.268475	0.450136	15	15	15	33.7	33.7	33.7	59.461	0	61.422	1062500000	62	15	15	15	1	12	11	14	12	11	12	12	11	14	12	11	12	12	11	14	12	11	12	520	520	1	79	NaN	NaN	NaN	NaN
Q7V146	Transglutaminase-like superfamily	Central Metabolism	0.00602222	0.00585086	24.195	24.1882	0.00681432	0.994323	2	2	2	26.9	26.9	26.9	10.672	0	14.354	219560000	12	2	2	2	1	2	2	2	2	2	2	2	2	2	2	2	2	2	2	2	2	2	2	93	93	1	12	NaN	NaN	NaN	NaN
Q7V152	G-protein beta WD-40 repeats	Other	0.00651573	0.00624072	24.6118	24.6019	0.00987943	0.99424	3	3	3	26.2	26.2	26.2	18.564	0	9.3648	186470000	10	3	3	3	1	2	2	2	3	2	2	2	2	2	3	2	2	2	2	2	3	2	2	172	172	1	14	NaN	NaN	NaN	NaN
Q7V153	Cobalamin synthesis protein/P47K	Central Metabolism	0.0983804	0.103541	28.8913	28.9962	-0.104887	0.623745	6	6	6	26.6	26.6	26.6	32.371	0	19.225	419160000	27	6	6	6	1	4	5	5	3	6	4	4	5	5	3	6	4	4	5	5	3	6	4	286	286	1	37	NaN	NaN	NaN	NaN
Q7V154	ABC transporter, substrate binding protein, possibly Mn	Membrane Transport	0.0207837	0.0210997	26.716	26.767	-0.0510031	0.726206	5	5	5	16.2	16.2	16.2	38.24	0	20.115	450620000	24	5	5	5	1	4	5	4	5	5	5	4	5	4	5	5	5	4	5	4	5	5	5	357	357	1	31	NaN	NaN	NaN	NaN
Q7V155	ABC transporter, ATP binding domain, possibly Mn transport	Membrane Transport	0.0103354	0.011021	24.7834	24.9046	-0.121196	0.204549	31	31	31	67.9	67.9	67.9	51.155	0	323.31	32729000000	436	31	31	31	1	29	30	31	29	30	30	29	30	31	29	30	30	29	30	31	29	30	30	452	452	1	390	NaN	NaN	NaN	NaN
Q7V156	Ferric uptake regulator family	Basic Cellular Processes	0.00953414	0.0074247	23.7346	23.3927	0.341923	0.410214	13	13	13	29	29	29	52.261	0	63.568	3690700000	78	13	13	13	1	11	11	10	9	9	10	11	11	10	9	9	10	11	11	10	9	9	10	473	473	1	80	NaN	NaN	NaN	NaN
Q7V164	Possible Gram-negative pili assembly chaperone	Basic Cellular Processes	0.0129408	0.0122596	25.1182	25.0685	0.0496788	0.754544	11	11	11	41.8	41.8	41.8	26.931	0	55.278	1242500000	84	11	11	11	1	10	11	11	9	11	9	10	11	11	9	11	9	10	11	11	9	11	9	249	249	1	82	NaN	NaN	NaN	NaN
Q7V169	Uncharacterized protein	Uncharacterized	0.00591976	0.00650782	24.1974	24.3576	-0.16023	0.595946	4	4	4	30.5	30.5	30.5	15.104	0	6.97	231790000	22	4	4	4	1	4	4	4	4	4	3	4	4	4	4	4	3	4	4	4	4	4	3	131	131	1	27	NaN	NaN	NaN	NaN
Q7V170	Conserved hypothetical	Uncharacterized	0.00894267	0.00880862	22.987	22.9958	-0.00881449	0.980974	13	13	13	52.6	52.6	52.6	29.039	0	58.267	1652900000	75	13	13	13	1	13	12	12	13	12	12	13	12	12	13	12	12	13	12	12	13	12	12	251	251	1	95	NaN	NaN	NaN	NaN
Q7V176	Uncharacterized protein	Uncharacterized	1.05822	0.785801	31.2879	30.8964	0.391572	0.335874	12	12	12	43.8	43.8	43.8	33.599	0	35.675	414280000	41	12	12	12	1	6	8	7	7	8	10	6	8	7	7	8	10	6	8	7	7	8	10	290	290	1	49	NaN	NaN	NaN	NaN
Q7V177	Glutathione peroxidase	Oxidative Stress	0.0611094	0.0607827	26.7933	26.8171	-0.0238228	0.946054	2	2	2	21.7	21.7	21.7	9.4799	0.00078555	3.7142	88197000	8	2	2	2	1	2	2	2	2	1	1	2	2	2	2	1	1	2	2	2	2	1	1	83	83	1	10	NaN	NaN	NaN	NaN
Q7V179	Formate-dependent phosphoribosylglycinamide formyltransferase	Central Metabolism	0.0302096	0.0290858	26.975	26.951	0.0240466	0.925134	11	11	11	80.7	80.7	80.7	25.481	0	193.04	30951000000	141	NaN	NaN	NaN	2	10	10	10	9	10	11	10	10	10	9	10	11	10	10	10	9	10	11	223	NaN	1	143	NaN	NaN	NaN	NaN
Q7V180	Probable aminopeptidase N	Basic Cellular Processes	0.00789221	0.00805828	26.1979	26.2546	-0.0567245	0.66347	5	5	5	36.5	36.5	36.5	18.947	0	41.534	2168300000	43	5	5	5	1	4	4	4	5	5	5	4	4	4	5	5	5	4	4	4	5	5	5	170	170	1	39	NaN	NaN	NaN	NaN
Q7V181	Uncharacterized protein	Uncharacterized	0.00762696	0.0069469	24.279	24.1729	0.106057	0.334115	14	14	14	39.7	39.7	39.7	43.723	0	101.26	3091000000	99	14	14	14	1	13	10	13	13	8	12	13	10	13	13	8	12	13	10	13	13	8	12	390	390	1	96	NaN	NaN	NaN	NaN
Q7V182	Uncharacterized protein	Uncharacterized	0.02451	0.0343054	24.4006	25.2366	-0.836079	0.66236	24	24	24	31.6	31.6	31.6	102.56	0	117.34	1425800000	94	24	24	24	1	21	18	17	21	18	18	21	18	17	21	18	18	21	18	17	21	18	18	869	869	1	138	NaN	NaN	NaN	NaN
Q7V184	Uncharacterized protein	Uncharacterized	0.030212	0.0444131	25.2385	26.1323	-0.893752	0.618971	4	4	4	13.9	13.9	13.9	26.593	0	6.2031	287430000	13	4	4	4	1	4	4	4	4	4	4	4	4	4	4	4	4	4	4	4	4	4	4	238	238	1	24	NaN	NaN	NaN	NaN
Q7V185	Uncharacterized protein	Uncharacterized	0.162811	0.157919	27.2538	27.234	0.019797	0.979379	2	2	2	30.7	30.7	30.7	11.459	0	14.739	303420000	9	2	2	2	1	1	2	2	2	2	2	1	2	2	2	2	2	1	2	2	2	2	2	101	101	1	11	NaN	NaN	NaN	NaN
Q7V186	Uncharacterized protein	Uncharacterized	0.094285	0.0924242	26.7222	26.7199	0.00233205	1	3	3	3	19.3	19.3	19.3	16.428	0	8.366	506210000	18	3	3	3	1	3	3	3	3	3	3	3	3	3	3	3	3	3	3	3	3	3	3	145	145	1	18	NaN	NaN	NaN	NaN
Q7V190	Conserved hypotheticcal protein	Uncharacterized	0.0407651	0.0402143	25.8695	25.8761	-0.00666491	0.982963	4	4	4	36.4	36.4	36.4	9.5314	0	26.478	1570700000	14	4	4	4	1	2	4	3	4	3	3	2	4	3	4	3	3	2	4	3	4	3	3	88	88	1	20	NaN	NaN	NaN	NaN
Q7V193	Helix-hairpin-helix DNA-binding motif class 1	Basic Cellular Processes	0.62317	0.684947	29.5179	29.683	-0.16519	0.225892	5	5	5	55.2	55.2	55.2	12.25	0	72.241	4060400000	112	5	5	5	1	5	5	5	5	5	5	5	5	5	5	5	5	5	5	5	5	5	5	105	105	1	102	NaN	NaN	NaN	NaN
Q7V194	Conserved hypothetical	Uncharacterized	0.0208134	0.0238235	25.0994	25.3227	-0.223327	0.220312	12	12	12	74.6	74.6	74.6	15.363	0	103.5	2588200000	82	12	12	12	1	10	11	12	11	11	11	10	11	12	11	11	11	10	11	12	11	11	11	134	134	1	102	NaN	NaN	NaN	NaN
Q7V199	Uncharacterized protein	Uncharacterized	0.0455737	0.0504807	25.1834	25.3658	-0.182355	0.611664	11	11	11	50.9	50.9	50.9	11.955	0	89.682	23409000000	136	11	11	11	1	10	9	10	9	10	11	10	9	10	9	10	11	10	9	10	9	10	11	110	110	1	128	NaN	NaN	NaN	NaN
Q7V1A3	Putative multidrug efflux ABC transporter	Membrane Transport	0.00716	0.0074583	24.6503	24.7342	-0.0838852	0.852677	6	6	6	41.6	41.6	41.6	18.002	0	12.397	795880000	28	6	6	6	1	6	5	6	6	4	5	6	5	6	6	4	5	6	5	6	6	4	5	154	154	1	34	NaN	NaN	NaN	NaN
Q7V1A4	Uncharacterized protein	Uncharacterized	0.0118638	0.0148356	24.0555	24.4063	-0.350777	0.1525	3	3	3	26.7	26.7	26.7	8.4647	0	4.8264	484240000	15	3	3	3	1	3	3	3	3	3	3	3	3	3	3	3	3	3	3	3	3	3	3	75	75	1	19	NaN	NaN	NaN	NaN
Q7V1A5	Putative ATP-binding subunit of urea ABC transport system	Membrane Transport	0.0355203	0.0376701	26.4818	26.6003	-0.118513	0.497721	9	9	9	23.4	23.4	23.4	37.523	0	11.898	496560000	27	9	9	9	1	5	8	6	6	6	6	5	8	6	6	6	6	5	8	6	6	6	6	329	329	1	42	NaN	NaN	NaN	NaN
Q7V1A6	Putative ATP binding subunit of urea ABC transport system	Membrane Transport	0.00755477	0.00800386	24.3358	24.4533	-0.117535	0.63535	3	3	3	31.3	31.3	31.3	15.029	0.00077042	3.0182	299090000	13	3	3	3	1	3	2	3	2	2	3	3	2	3	2	2	3	3	2	3	2	2	3	131	131	1	15	NaN	NaN	NaN	NaN
Q7V1A7	Putative membrane protein of urea ABC transport system	Membrane Transport	0.00416798	0.00239757	23.9912	23.0149	0.976276	0.587836	13	13	13	54.2	54.2	54.2	26.092	0	307.01	2067500000	67	13	13	13	1	10	11	11	11	12	11	10	11	11	11	12	11	10	11	11	11	12	11	236	236	1	79	NaN	NaN	NaN	NaN
Q7V1A9	Putative urea ABC transporter, substrate binding protein	Membrane Transport	0.336281	0.339543	30.6259	30.6678	-0.0419013	0.614868	6	6	6	23.5	23.5	23.5	27.72	0	9.5063	564290000	33	6	6	6	1	6	6	6	5	6	6	6	6	6	5	6	6	6	6	6	5	6	6	251	251	1	45	NaN	NaN	NaN	NaN
Q7V1B0	Urease accessory protein UreG	Central Metabolism	0.0154624	0.0161276	25.055	25.144	-0.0889257	0.514571	3	3	3	9	9	9	41.777	0	4.6592	133820000	7	3	3	3	1	3	2	2	1	1	2	3	2	2	1	1	2	3	2	2	1	1	2	378	378	1	11	NaN	NaN	NaN	NaN
Q7V1B1	Urease accessory protein UreF	Central Metabolism	0.00725762	0.00618721	24.0428	23.9255	0.117377	0.938734	21	21	21	58.5	58.5	58.5	47.6	0	315.85	50661000000	421	21	21	21	1	21	21	21	21	21	21	21	21	21	21	21	21	21	21	21	21	21	21	439	439	1	374	NaN	NaN	NaN	NaN
Q7V1B2	Urease accessory protein UreE	Central Metabolism	0.0126326	0.0139203	24.3768	24.5475	-0.170693	0.299432	8	8	8	44.8	44.8	44.8	21.78	0	57.159	807390000	27	8	8	8	1	7	7	6	7	8	7	7	7	6	7	8	7	7	7	6	7	8	7	201	201	1	46	NaN	NaN	NaN	NaN
Q7V1B3	Urease accessory protein UreD	Central Metabolism	0.0113146	0.0125242	25.1599	25.3411	-0.181194	0.479634	4	4	4	18	18	18	26.682	0	12.688	123550000	12	4	4	4	1	3	1	2	3	2	3	3	1	2	3	2	3	3	1	2	3	2	3	228	228	1	14	NaN	NaN	NaN	NaN
Q7V1B4	Urease subunit gamma	Central Metabolism	0.0372471	0.0286654	25.3169	24.9564	0.36047	0.311349	8	8	8	46.1	46.1	46.1	18.027	0	17.319	575310000	38	8	8	8	1	8	6	6	8	7	7	8	6	6	8	7	7	8	6	6	8	7	7	154	154	1	60	NaN	NaN	NaN	NaN
Q7V1B6	Urease subunit alpha	Central Metabolism	0.0755448	0.0795714	28.8455	28.9473	-0.10181	0.459952	6	6	6	24.2	24.2	24.2	33.494	0	46.614	597120000	34	6	6	6	1	6	6	6	5	5	5	6	6	6	5	5	5	6	6	6	5	5	5	297	297	1	34	NaN	NaN	NaN	NaN
Q7V1B7	Possible Vng0271c	Other	0.0833852	0.0747899	28.5084	28.3795	0.128894	0.162667	4	4	4	48	48	48	11.173	0	27.068	430540000	24	4	4	4	1	3	2	3	4	3	3	3	2	3	4	3	3	3	2	3	4	3	3	100	100	1	23	NaN	NaN	NaN	NaN
Q7V1B8	Glycoside hydrolase family 13	Central Metabolism	0.00880185	0.0100288	25.7813	25.9992	-0.217918	0.368335	23	23	23	52	52	52	61.652	0	263.24	13319000000	189	23	23	23	1	21	23	21	21	21	21	21	23	21	21	21	21	21	23	21	21	21	21	569	569	1	214	NaN	NaN	NaN	NaN
Q7V1B9	Uncharacterized protein	Uncharacterized	0.0893661	0.096902	27.9949	28.1403	-0.145436	0.290316	26	26	26	76	76	76	46.017	0	323.31	21713000000	300	26	26	26	1	24	24	24	25	26	25	24	24	24	25	26	25	24	24	24	25	26	25	408	408	1	300	NaN	NaN	NaN	NaN
Q7V1C0	Uncharacterized protein	Uncharacterized	0.00946982	0.00933158	25.0089	25.0174	-0.00842603	0.957366	14	14	14	28	28	28	67.39	0	95.77	1500100000	84	14	14	14	1	13	14	13	14	12	14	13	14	13	14	12	14	13	14	13	14	12	14	585	585	1	86	NaN	NaN	NaN	NaN
Q7V1C4	Peptide methionine sulfoxide reductase MsrA	Oxidative Stress	0.0467715	0.0490343	26.9178	27.0167	-0.0989196	0.487828	11	11	11	51.3	51.3	51.3	29.956	0	91.087	3649600000	55	11	11	11	1	9	10	9	8	7	10	9	10	9	8	7	10	9	10	9	8	7	10	267	267	1	70	NaN	NaN	NaN	NaN
Q7V1C5	ABC transporter, multidrug efflux family	Membrane Transport	0.0158454	0.0164178	26.6227	26.7004	-0.0777658	0.479594	9	9	9	29.2	29.2	29.2	37.098	0	21.787	940780000	40	9	9	9	1	7	7	8	8	8	8	7	7	8	8	8	8	7	7	8	8	8	8	318	318	1	56	NaN	NaN	NaN	NaN
Q7V1C7	Carbamoyl-phosphate synthase small chain	Central Metabolism	0.0187845	0.017608	26.2539	26.1864	0.0674966	0.790169	14	14	14	62	62	62	28.158	0	63.919	2534500000	83	14	14	14	1	12	12	14	12	11	12	12	12	14	12	11	12	12	12	14	12	11	12	242	242	1	100	NaN	NaN	NaN	NaN
Q7V1C9	Uncharacterized protein	Uncharacterized	0.120405	0.1218	26.6867	26.7314	-0.0446536	0.808681	11	11	11	25.6	25.6	25.6	64.342	0	176.73	2154600000	70	11	11	11	1	11	11	11	10	10	10	11	11	11	10	10	10	11	11	11	10	10	10	581	581	1	76	NaN	NaN	NaN	NaN
Q7V1D0	Glutamyl-tRNA(Gln) amidotransferase subunit A	Basic Cellular Processes	0.069614	0.0645901	28.4936	28.4144	0.0791938	0.285504	10	10	10	23.2	23.2	23.2	42.041	0	26.466	2234600000	62	10	10	10	1	9	9	10	8	10	10	9	9	10	8	10	10	9	9	10	8	10	10	380	380	1	87	NaN	NaN	NaN	NaN
Q7V1D1	DNA-directed DNA polymerase	Basic Cellular Processes	0.0013785	0.00143503	24.1034	24.18	-0.0766093	0.809398	7	7	7	72.5	72.5	72.5	9.3328	0	41.586	2737600000	57	7	7	7	1	7	7	7	7	7	7	7	7	7	7	7	7	7	7	7	7	7	7	80	80	1	50	NaN	NaN	NaN	NaN
Q7V1D2	Uncharacterized protein	Uncharacterized	0.0255871	0.0312138	25.341	25.6557	-0.314696	0.1376	37	37	37	73.1	73.1	73.1	52.186	0	323.31	20427000000	381	37	37	37	1	34	34	35	36	35	35	34	34	35	36	35	35	34	34	35	36	35	35	484	484	1	360	NaN	NaN	NaN	NaN
Q7V1D3	Holliday junction ATP-dependent DNA helicase RuvA	Basic Cellular Processes	0.0825871	0.0785786	27.5952	27.5502	0.0450077	0.851118	22	22	22	24.6	24.6	24.6	131.26	0	38.938	787330000	59	22	22	22	1	16	15	17	13	16	13	16	15	17	13	16	13	16	15	17	13	16	13	1165	1165	1	95	NaN	NaN	NaN	NaN
Q7V1D4	Possible cAMP phosphodiesterases class-II	Central Metabolism	0.0816156	0.0863555	26.6989	26.8058	-0.10689	0.607072	5	5	5	20.3	20.3	20.3	16.385	0	11.746	637350000	20	5	5	5	1	4	4	4	4	4	3	4	4	4	4	4	3	4	4	4	4	4	3	148	148	1	30	NaN	NaN	NaN	NaN
Q7V1D6	DNA primase	Basic Cellular Processes	0.00901709	0.00965778	26.0298	26.1591	-0.129271	0.47257	10	10	10	39.7	39.7	39.7	25.362	0	34.528	5044000000	65	10	10	10	1	9	8	9	9	9	8	9	8	9	9	9	8	9	8	9	9	9	8	219	219	1	120	NaN	NaN	NaN	NaN
Q7V1D9	Ribosomal RNA large subunit methyltransferase H	Basic Cellular Processes	0.0102864	0.010636	23.9119	23.9799	-0.0680326	0.890263	4	4	4	62.2	62.2	62.2	12.713	0	76.609	3301500000	43	4	4	4	1	4	4	4	4	4	4	4	4	4	4	4	4	4	4	4	4	4	4	119	119	1	45	NaN	NaN	NaN	NaN
Q7V1E1	Ribosomal RNA small subunit methyltransferase A	Basic Cellular Processes	0.00479021	0.00516321	23.8256	23.9637	-0.138157	0.490595	23	23	23	40	40	40	78.551	0	105.55	2023600000	111	23	23	23	1	17	17	19	15	18	18	17	17	19	15	18	18	17	17	19	15	18	18	678	678	1	117	NaN	NaN	NaN	NaN
Q7V1E2	4-diphosphocytidyl-2-C-methyl-D-erythritol kinase	Central Metabolism	0.00965439	0.0104764	25.0084	25.1567	-0.148315	0.445928	6	6	6	45.3	45.3	45.3	15.68	0	11.455	305770000	23	6	6	6	1	5	4	5	4	5	4	5	4	5	4	5	4	5	4	5	4	5	4	137	137	1	29	NaN	NaN	NaN	NaN
Q7V1E4	Pyruvate dehydrogenase E1 beta subunit	Central Metabolism	0.0672642	0.0685655	27.8786	27.935	-0.0564194	0.556254	3	3	3	15.5	15.5	15.5	31.825	0	4.8491	216620000	12	3	3	3	1	3	3	3	3	3	3	3	3	3	3	3	3	3	3	3	3	3	3	277	277	1	18	NaN	NaN	NaN	NaN
Q7V1E5	Protein translocase subunit SecD	Membrane Transport	0.0300163	0.0277798	27.2835	27.2018	0.0816383	0.664531	12	12	12	34.6	34.6	34.6	35.141	0	73.391	1222300000	59	12	12	12	1	10	11	11	11	9	8	10	11	11	11	9	8	10	11	11	11	9	8	312	312	1	72	NaN	NaN	NaN	NaN
Q7V1E6	Protein-export membrane protein SecF	Membrane Transport	0.0245523	0.0239905	26.3185	26.3195	-0.00100644	1	12	12	12	46.5	46.5	46.5	36.022	0	104.06	6745000000	113	12	12	12	1	10	11	12	10	10	10	10	11	12	10	10	10	10	11	12	10	10	10	327	327	1	111	NaN	NaN	NaN	NaN
Q7V1E7	Uncharacterized protein	Uncharacterized	0.0261661	0.0237255	26.6018	26.4867	0.115083	0.49031	21	21	21	44.7	44.7	44.7	53.761	0	166.71	5545700000	128	21	21	21	1	19	17	16	17	17	19	19	17	16	17	17	19	19	17	16	17	17	19	486	486	1	144	NaN	NaN	NaN	NaN
Q7V1E8	Uncharacterized protein	Uncharacterized	0.0344022	0.033253	27.01	26.9887	0.0212275	0.822327	9	9	9	34.4	34.4	34.4	34.403	0	46.13	1814700000	70	9	9	9	1	7	8	8	8	8	9	7	8	8	8	8	9	7	8	8	8	8	9	305	305	1	59	NaN	NaN	NaN	NaN
Q7V1E9	Uncharacterized protein	Uncharacterized	0.00760057	0.0104815	24.3023	24.795	-0.492744	0.270485	7	7	7	19.9	19.9	19.9	38.743	0	56.972	2019500000	54	7	7	7	1	5	6	6	7	6	7	5	6	6	7	6	7	5	6	6	7	6	7	347	347	1	63	NaN	NaN	NaN	NaN
Q7V1F2	SAM (And some other nucleotide) binding motif:Generic methyl-transferase	Other	0.0112697	0.0129993	25.4039	25.6375	-0.23361	0.1494	17	17	17	44	44	44	40.475	0	72.749	3122000000	86	17	17	17	1	15	12	13	15	12	12	15	12	13	15	12	12	15	12	13	15	12	12	350	350	1	111	NaN	NaN	NaN	NaN
Q7V1F3	Glutamine synthetase	Inorganic Nutrient Processing	0.133371	0.12258	29.3987	29.3055	0.0932592	0.217471	7	7	7	22.1	22.1	22.1	28.784	0	11.164	370100000	31	7	7	7	1	2	6	6	6	6	5	2	6	6	6	6	5	2	6	6	6	6	5	244	244	1	31	NaN	NaN	NaN	NaN
Q7V1F4	Serine:pyruvate/alanine:glyoxylate aminotransferase	Central Metabolism	0.00920816	0.00988265	25.2763	25.4081	-0.131747	0.481554	12	12	12	33.6	33.6	33.6	41.019	0	32.029	1534200000	56	12	12	12	1	12	11	12	11	12	11	12	11	12	11	12	11	12	11	12	11	12	11	351	351	1	82	NaN	NaN	NaN	NaN
Q7V1F5	Putative cytidine/deoxycytidylate deaminase	Central Metabolism	0.0089384	0.00816046	23.9685	23.8705	0.0980479	0.830904	25	25	25	71	71	71	52.877	0	323.31	26634000000	329	25	25	25	1	23	24	24	22	24	23	23	24	24	22	24	23	23	24	24	22	24	23	473	473	1	302	NaN	NaN	NaN	NaN
Q7V1F6	Pyridoxal-dependent decarboxylase family protein	Central Metabolism	0.00720342	0.00676462	25.1478	25.0846	0.0632178	0.634404	9	9	9	38.3	38.3	38.3	44.114	0	26.514	760680000	31	9	9	9	1	7	7	8	4	8	4	7	7	8	4	8	4	7	7	8	4	8	4	394	394	1	42	NaN	NaN	NaN	NaN
Q7V1F7	Uncharacterized protein	Uncharacterized	0.00846258	0.00785354	25.4991	25.4212	0.0779139	0.493211	4	4	4	28.5	28.5	28.5	18.969	0	11.309	249840000	16	4	4	4	1	4	4	4	4	4	4	4	4	4	4	4	4	4	4	4	4	4	4	165	165	1	25	NaN	NaN	NaN	NaN
Q7V1G0	Possible ABC transporter	Membrane Transport	0.0177219	0.017785	26.2769	26.3108	-0.0338872	0.689163	13	13	13	45.4	45.4	45.4	50.924	0	100.42	1388500000	65	13	13	13	1	10	10	9	10	9	9	10	10	9	10	9	9	10	10	9	10	9	9	460	460	1	75	NaN	NaN	NaN	NaN
Q7V1G1	Pyruvate kinase	Central Metabolism	0.199282	0.190794	30.3119	30.2771	0.034778	0.458206	13	13	13	29.4	29.4	29.4	57.143	0	61.101	1219700000	48	13	13	13	1	10	10	11	8	10	11	10	10	11	8	10	11	10	10	11	8	10	11	500	500	1	63	NaN	NaN	NaN	NaN
Q7V1G2	Uncharacterized protein	Uncharacterized	0.11829	0.12959	27.1056	27.2682	-0.1626	0.400189	20	20	20	46.5	46.5	46.5	43.595	0	118.32	3820100000	115	20	20	20	1	18	19	19	19	18	19	18	19	19	19	18	19	18	19	19	19	18	19	409	409	1	150	NaN	NaN	NaN	NaN
Q7V1G4	Segregation and condensation protein B	Basic Cellular Processes	0.0403624	0.0426962	26.111	26.2197	-0.108699	0.379095	39	39	39	75.2	75.2	75.2	64.876	0	323.31	52413000000	481	39	39	39	1	35	37	37	35	36	35	35	37	37	35	36	35	35	37	37	35	36	35	596	596	1	510	NaN	NaN	NaN	NaN
Q7V1G5	L-threonine dehydratase	Central Metabolism	0.0196278	0.0184773	26.7493	26.6925	0.0567602	0.634251	3	3	3	36.7	36.7	36.7	12.282	0	16.417	1391600000	17	3	3	3	1	2	2	2	2	3	3	2	2	2	2	3	3	2	2	2	2	3	3	109	109	1	15	NaN	NaN	NaN	NaN
Q7V1G6	1-deoxy-D-xylulose-5-phosphate synthase	Central Metabolism	0.049452	0.0482657	28.3974	28.3885	0.0088857	0.967508	7	7	7	53.8	53.8	53.8	18.334	0	54.451	1978300000	52	7	7	7	1	6	7	7	7	7	6	6	7	7	7	7	6	6	7	7	7	7	6	160	160	1	52	NaN	NaN	NaN	NaN
Q7V1H0	50S ribosomal protein L28	Basic Cellular Processes	0.0721991	0.0902918	25.9133	26.2598	-0.346556	0.216	29	29	29	55	55	55	57.714	0	119.82	6576400000	212	29	29	29	1	26	25	28	25	28	26	26	25	28	25	28	26	26	25	28	25	28	26	513	513	1	233	NaN	NaN	NaN	NaN
Q7V1H1	Heat shock protein HtpG	Basic Cellular Processes	0.210678	0.200338	30.4816	30.437	0.0445773	0.243442	33	33	33	64.8	64.8	64.8	68.935	0	323.31	24516000000	415	33	33	33	1	28	30	32	32	32	32	28	30	32	32	32	32	28	30	32	32	32	32	637	637	1	400	NaN	NaN	NaN	NaN
Q7V1H2	Inositol-1-monophosphatase	Central Metabolism	0.00810515	0.00761372	24.6074	24.5505	0.0569661	0.80494	9	9	9	62.8	62.8	62.8	8.8874	0	66.905	1406100000	44	9	9	9	1	8	9	8	8	8	8	8	9	8	8	8	8	8	9	8	8	8	8	78	78	1	54	NaN	NaN	NaN	NaN
Q7V1H4	Chaperone protein dnaK1	Basic Cellular Processes	0.0375504	0.0364234	28.0621	28.0446	0.0175006	0.904066	55	55	55	74	74	74	72.551	0	323.31	114480000000	804	55	55	55	1	52	51	51	52	50	52	52	51	51	52	50	52	52	51	51	52	50	52	634	634	1	776	NaN	NaN	NaN	NaN
Q7V1H5	DnaJ2 protein	Basic Cellular Processes	0.00411843	0.00426979	23.7834	23.8649	-0.0814966	0.747783	11	11	11	58.2	58.2	58.2	31.267	0	105.56	1218800000	62	11	11	11	1	11	10	11	10	10	8	11	10	11	10	10	8	11	10	11	10	10	8	282	282	1	82	NaN	NaN	NaN	NaN
Q7V1H7	Peptidyl-prolyl cis-trans isomerase	Central Metabolism	0.152826	0.151898	27.8877	27.9091	-0.0214119	0.939888	41	41	41	71.7	71.7	71.7	73.429	0	323.31	15558000000	322	41	41	41	1	40	40	40	40	40	38	40	40	40	40	40	38	40	40	40	40	40	38	665	665	1	323	NaN	NaN	NaN	NaN
Q7V1H8	Riboflavin biosynthesis protein RibBA	Central Metabolism	0.0586867	0.0574831	28.5017	28.4993	0.00244331	0.990141	5	5	5	17.6	17.6	17.6	35.73	0	12.053	248650000	16	5	5	5	1	2	5	3	3	5	3	2	5	3	3	5	3	2	5	3	3	5	3	313	313	1	21	NaN	NaN	NaN	NaN
Q7V1H9	N-acetyl-gamma-glutamyl-phosphate reductase	Central Metabolism	0.019181	0.0197404	26.169	26.2407	-0.0716985	0.474146	8	8	8	86.9	86.9	86.9	15.395	0	169.6	9392300000	115	8	8	8	1	8	8	8	8	8	8	8	8	8	8	8	8	8	8	8	8	8	8	145	145	1	122	NaN	NaN	NaN	NaN
Q7V1I0	Phosphoribosylglycinamide formyltransferase	Central Metabolism	0.0205583	0.0180931	25.5751	25.4214	0.153766	0.651147	40	40	40	68.3	68.3	68.3	64.655	0	323.31	18355000000	317	40	40	40	1	31	35	36	36	36	37	31	35	36	36	36	37	31	35	36	36	36	37	577	577	1	352	NaN	NaN	NaN	NaN
Q7V1I1	Glucose-6-phosphate isomerase	Central Metabolism	0.0842265	0.0765688	28.8892	28.78	0.109191	0.161333	12	12	12	40.2	40.2	40.2	38.781	0	70.954	2713500000	67	12	12	12	1	11	12	11	11	10	11	11	12	11	11	10	11	11	12	11	11	10	11	351	351	1	85	NaN	NaN	NaN	NaN
Q7V1I2	Leucine--tRNA ligase	Basic Cellular Processes	0.0212786	0.0204682	27.609	27.5816	0.0274607	0.843071	5	5	5	27.5	27.5	27.5	24.445	0	27.336	1033100000	43	5	5	5	1	5	5	5	5	5	5	5	5	5	5	5	5	5	5	5	5	5	5	218	218	1	45	NaN	NaN	NaN	NaN
Q7V1I3	Diaminopimelate epimerase	Central Metabolism	0.020429	0.0202603	25.9644	25.9824	-0.0179761	0.926355	30	30	30	51.7	51.7	51.7	59.306	0	275.08	16559000000	279	30	30	30	1	30	29	29	30	29	29	30	29	29	30	29	29	30	29	29	30	29	29	526	526	1	295	NaN	NaN	NaN	NaN
Q7V1I4	Possible cysteine desulfurase (Class-V aminotransferase family)	Central Metabolism	0.0103438	0.00954023	25.4185	25.343	0.0755304	0.842768	57	57	57	60	60	60	99.146	0	323.31	18024000000	468	57	57	57	1	47	50	49	52	51	49	47	50	49	52	51	49	47	50	49	52	51	49	858	858	1	476	NaN	NaN	NaN	NaN
Q7V1I5	Uncharacterized protein	Uncharacterized	0.0226979	0.0228183	25.7043	25.7423	-0.0379842	0.809821	20	20	20	68.9	68.9	68.9	31.975	0	104.77	3144700000	110	20	20	20	1	19	18	18	17	19	16	19	18	18	17	19	16	19	18	18	17	19	16	286	286	1	141	NaN	NaN	NaN	NaN
Q7V1I6	Putative D-Ala-D-Ala carboxypeptidase 3 (S13) family	Central Metabolism	0.00967756	0.00782794	25.0389	24.4924	0.546511	0.784957	12	12	12	48.7	48.7	48.7	43.938	0	59.963	1619100000	61	12	12	12	1	12	11	12	11	11	12	12	11	12	11	11	12	12	11	12	11	11	12	390	390	1	88	NaN	NaN	NaN	NaN
Q7V1I7	Phosphopantetheine adenylyltransferase	Central Metabolism	0.170744	0.175197	28.1781	28.2478	-0.069678	0.808159	8	8	8	40	40	40	25.374	0	25.764	1377600000	46	8	8	8	1	7	7	7	7	8	7	7	7	7	7	8	7	7	7	7	7	8	7	215	215	1	58	NaN	NaN	NaN	NaN
Q7V1I8	Uncharacterized protein	Uncharacterized	0.168624	0.189619	28.179	28.3877	-0.208619	0.550207	5	5	5	18	18	18	37.3	0	10.343	299830000	16	5	5	5	1	3	5	4	2	4	2	3	5	4	2	4	2	3	5	4	2	4	2	323	323	1	22	NaN	NaN	NaN	NaN
Q7V1I9	UvrABC system protein C	Other	0.00272967	0.00324641	24.2524	24.5384	-0.285948	0.382026	9	9	9	85.5	85.5	85.5	17.896	0	70.735	4285500000	88	9	9	9	1	7	8	7	7	8	9	7	8	7	7	8	9	7	8	7	7	8	9	159	159	1	89	NaN	NaN	NaN	NaN
Q7V1J2	Cobalamin biosynthetic protein CobN	Central Metabolism	0.0220916	0.0127723	28.1975	26.4922	1.70522	0.63261	7	7	7	43.2	43.2	43.2	17.514	0	33.925	7559400000	54	7	7	7	1	4	7	5	6	4	5	4	7	5	6	4	5	4	7	5	6	4	5	162	162	1	54	NaN	NaN	NaN	NaN
Q7V1J3	Putative methionine synthase	Central Metabolism	0.00990574	0.00958535	26.9737	26.9551	0.0185763	0.781312	11	11	11	21.2	21.2	21.2	76.421	0	16.696	312920000	29	11	11	11	1	3	5	5	7	6	5	3	5	5	7	6	5	3	5	5	7	6	5	656	656	1	34	NaN	NaN	NaN	NaN
Q7V1J5	Uncharacterized protein	Uncharacterized	0.0170588	0.0204137	24.5668	24.8514	-0.28459	0.319217	10	10	10	8.3	8.3	8.3	142.85	0	21.017	1924300000	30	10	10	10	1	5	5	7	7	2	3	5	5	7	7	2	3	5	5	7	7	2	3	1245	1245	1	29	NaN	NaN	NaN	NaN
Q7V1J6	Possible ATP adenylyltransferase	Central Metabolism	0.00432824	0.00404504	23.6593	23.6067	0.0526714	0.924277	47	47	47	51.3	51.3	51.3	132.09	0	295.15	9879200000	313	47	47	47	1	43	41	44	40	39	40	43	41	44	40	39	40	43	41	44	40	39	40	1186	1186	1	352	NaN	NaN	NaN	NaN
Q7V1J7	Possible DnaJ domain	Basic Cellular Processes	0.0205688	0.023314	26.2071	26.4202	-0.21312	0.380033	6	6	6	54.6	54.6	54.6	14.913	0	24.972	461980000	28	6	6	6	1	4	4	4	5	4	5	4	4	4	5	4	5	4	4	4	5	4	5	130	130	1	32	NaN	NaN	NaN	NaN
Q7V1J8	Phenylalanine--tRNA ligase beta subunit	Basic Cellular Processes	0.0183095	0.0175469	27.3289	27.296	0.0328827	0.779501	6	6	6	22.8	22.8	22.8	32.419	0	14.904	267200000	40	6	6	6	1	4	5	3	4	5	4	4	5	3	4	5	4	4	5	3	4	5	4	276	276	1	38	NaN	NaN	NaN	NaN
Q7V1J9	Probable ribonuclease II	Basic Cellular Processes	0.00291675	0.00163253	23.5588	22.8044	0.754477	0.336929	11	11	11	40.4	40.4	40.4	38.767	0	76.622	1072900000	41	11	11	11	1	7	6	8	7	7	6	7	6	8	7	7	6	7	6	8	7	7	6	337	337	1	43	NaN	NaN	NaN	NaN
Q7V1K0	Methionine--tRNA ligase	Basic Cellular Processes	0.199866	0.186087	30.0944	30.019	0.0753625	0.218625	48	48	48	47.4	47.4	47.4	92.757	0	323.31	15805000000	356	48	48	48	1	45	46	45	46	45	46	45	46	45	46	45	46	45	46	45	46	45	46	821	821	1	386	NaN	NaN	NaN	NaN
Q7V1K1	Possible SMC domain N terminal domain	Basic Cellular Processes	0.00657912	0.00782015	23.386	23.7821	-0.396076	0.743145	6	6	6	17	17	17	46.16	0	6.9766	96703000	11	6	6	6	1	5	4	2	3	3	3	5	4	2	3	3	3	5	4	2	3	3	3	394	394	1	21	NaN	NaN	NaN	NaN
Q7V1K2	Uncharacterized protein	Uncharacterized	0.00703954	0.00751665	23.9586	24.0909	-0.13228	0.755448	41	41	41	71	71	71	59.114	0	323.31	51933000000	526	41	41	41	1	39	37	38	38	38	40	39	37	38	38	38	40	39	37	38	38	38	40	511	511	1	491	NaN	NaN	NaN	NaN
Q7V1K3	Putative cobinamide kinase	Central Metabolism	0.00748593	0.0057149	23.8567	23.4547	0.401962	0.588307	3	3	3	22.8	22.8	22.8	18.786	0	6.4438	158030000	19	3	3	3	1	2	2	2	2	2	3	2	2	2	2	2	3	2	2	2	2	2	3	162	162	1	13	NaN	NaN	NaN	NaN
Q7V1K7	Uncharacterized protein	Uncharacterized	0.0301296	0.0268307	25.294	25.1585	0.135471	0.48953	5	5	5	23.1	23.1	23.1	23.439	0	14.777	339130000	25	5	5	5	1	5	4	4	5	4	4	5	4	4	5	4	4	5	4	4	5	4	4	208	208	1	28	NaN	NaN	NaN	NaN
Q7V1K9	Thioredoxin peroxidase	Oxidative Stress	0.957882	0.913705	30.9576	30.917	0.0406259	0.755469	6	6	6	48.4	48.4	48.4	20.848	0	12.333	209130000	19	6	6	6	1	4	4	3	4	4	3	4	4	3	4	4	3	4	4	3	4	4	3	182	182	1	23	NaN	NaN	NaN	NaN
Q7V1L1	ATP-dependent zinc metalloprotease FtsH	Basic Cellular Processes	0.012317	0.0122221	26.2664	26.2834	-0.0169233	0.812987	3	3	3	22.1	22.1	22.1	14.282	0	7.3419	358490000	12	3	3	3	1	3	3	3	2	2	2	3	3	3	2	2	2	3	3	3	2	2	2	122	122	1	15	NaN	NaN	NaN	NaN
Q7V1L3	Uncharacterized protein	Uncharacterized	0.0255672	0.0251378	24.8846	24.8854	-0.000847499	1	20	20	20	83.5	83.5	83.5	21.758	0	258.9	68143000000	465	20	20	20	1	18	17	18	20	19	20	18	17	18	20	19	20	18	17	18	20	19	20	194	194	1	425	NaN	NaN	NaN	NaN
Q7V1L8	Putative acetazolamide conferring resistance protein Zam	Other	0.0283543	0.0274265	27.8089	27.7885	0.0204067	0.821207	38	38	38	60.4	60.4	60.4	64.033	0	223.11	5777600000	231	38	38	38	1	34	36	33	33	33	34	34	36	33	33	33	34	34	36	33	33	33	34	584	584	1	258	NaN	NaN	NaN	NaN
Q7V1L9	Uncharacterized secreted proteins, Ya	Uncharacterized	0.0259346	0.0261501	25.3831	25.4281	-0.0450013	0.897306	3	3	3	45.4	45.4	45.4	12.167	0	6.8858	275420000	14	3	3	3	1	3	2	2	2	2	3	3	2	2	2	2	3	3	2	2	2	2	3	108	108	1	14	NaN	NaN	NaN	NaN
Q7V1M0	Uncharacterized protein	Uncharacterized	0.088339	0.0910354	27.4346	27.5065	-0.0718517	0.157263	49	49	49	56.6	56.6	56.6	86.16	0	251.13	10618000000	280	49	49	49	1	40	42	43	42	43	41	40	42	43	42	43	41	40	42	43	42	43	41	739	739	1	363	NaN	NaN	NaN	NaN
Q7V1M1	Magnesium-protoporphyrin IX monomethyl ester [oxidative] cyclase	Photosynthesis	0.00956665	0.00962029	25.3168	25.3546	-0.037789	0.894905	4	4	4	29.8	29.8	29.8	17.926	0	19.921	1103300000	36	4	4	4	1	3	4	3	3	3	3	3	4	3	3	3	3	3	4	3	3	3	3	151	151	1	38	NaN	NaN	NaN	NaN
Q7V1M2	Putative modulator of DNA gyrase TldD	Basic Cellular Processes	0.0210747	0.0204417	26.7379	26.7242	0.0137609	0.945871	15	15	15	60.7	60.7	60.7	20.906	0	167.83	7955200000	151	15	15	15	1	15	15	15	15	15	15	15	15	15	15	15	15	15	15	15	15	15	15	183	183	1	157	NaN	NaN	NaN	NaN
Q7V1M3	Possible modulator of DNA gyrase	Basic Cellular Processes	0.010109	0.00933486	25.6056	25.5162	0.0893408	0.511106	11	11	11	31.5	31.5	31.5	45.98	0	77.912	1113400000	57	11	11	11	1	9	8	11	7	8	8	9	8	11	7	8	8	9	8	11	7	8	8	390	390	1	61	NaN	NaN	NaN	NaN
Q7V1M5	Transcription-repair-coupling factor	Basic Cellular Processes	0.0052758	0.0050595	26.0469	26.013	0.0338561	0.810234	14	14	14	30.6	30.6	30.6	51.976	0	99.057	1965100000	50	14	14	14	1	9	10	10	9	11	12	9	10	10	9	11	12	9	10	10	9	11	12	474	474	1	78	NaN	NaN	NaN	NaN
Q7V1M6	Uncharacterized protein	Uncharacterized	0.0236453	0.0228377	25.7023	25.6817	0.0206394	0.892	16	16	16	46.9	46.9	46.9	49.756	0	82.723	2575100000	94	16	16	16	1	14	15	14	14	14	15	14	15	14	14	14	15	14	15	14	14	14	15	450	450	1	123	NaN	NaN	NaN	NaN
Q7V1M7	Uncharacterized protein	Uncharacterized	0.0202283	0.020091	25.2512	25.2636	-0.0124226	0.977461	49	49	49	45.9	45.9	45.9	134.98	0	319.47	3628600000	233	49	49	49	1	42	39	41	38	38	37	42	39	41	38	38	37	42	39	41	38	38	37	1171	1171	1	286	NaN	NaN	NaN	NaN
Q7V1M9	Possible 2-octaprenyl-6-methoxyphenol 4-monoxygenase UbiH	Central Metabolism	0.0143083	0.0131794	25.8763	25.7872	0.0891171	0.476112	3	3	3	21.8	21.8	21.8	23.721	0	26.112	866670000	22	3	3	3	1	2	2	3	3	3	3	2	2	3	3	3	3	2	2	3	3	3	3	206	206	1	29	NaN	NaN	NaN	NaN
Q7V1N0	Uncharacterized protein	Uncharacterized	0.0125065	0.0129508	24.4159	24.5898	-0.173885	0.972448	8	8	8	39.2	39.2	39.2	20.615	0	23.995	723050000	29	8	8	8	1	5	7	7	7	5	6	5	7	7	7	5	6	5	7	7	7	5	6	176	176	1	40	NaN	NaN	NaN	NaN
Q7V1N1	4-hydroxy-tetrahydrodipicolinate reductase	Central Metabolism	0.117861	0.115869	28.4731	28.4783	-0.00523122	0.979695	10	10	10	28.6	28.6	28.6	44.657	0	64.428	1551200000	43	10	10	10	1	10	8	9	7	6	8	10	8	9	7	6	8	10	8	9	7	6	8	384	384	1	48	NaN	NaN	NaN	NaN
Q7V1N2	Protoporphyrin IX magnesium chelatase, subunit chlH	Photosynthesis	0.0082909	0.00757863	26.8882	26.7868	0.101386	0.320422	4	4	4	16.8	16.8	16.8	25.154	0	8.6524	442560000	11	4	4	4	1	2	1	2	3	3	2	2	1	2	3	3	2	2	1	2	3	3	2	214	214	1	13	NaN	NaN	NaN	NaN
Q7V1N3	Dihydropteroate synthase	Central Metabolism	0.0097235	0.0100676	24.8649	24.94	-0.0750904	0.664337	24	24	24	88.7	88.7	88.7	30.639	0	289.21	11724000000	219	24	24	24	1	19	23	21	20	22	24	19	23	21	20	22	24	19	23	21	20	22	24	282	282	1	239	NaN	NaN	NaN	NaN
Q7V1N4	Triosephosphate isomerase	Central Metabolism	0.0211607	0.0230154	25.7691	25.9144	-0.145358	0.510033	63	63	63	56.6	56.6	56.6	150.09	0	323.31	11239000000	484	63	63	63	1	51	59	55	52	53	45	51	59	55	52	53	45	51	59	55	52	53	45	1335	1335	1	505	NaN	NaN	NaN	NaN
Q7V1N6	ABC transporter, possibly multidrug efflux	Membrane Transport	0.038235	0.038272	27.9534	27.9834	-0.0299581	0.756328	4	4	4	26.4	26.4	26.4	31.585	0	18.703	341100000	19	4	4	4	1	3	3	2	2	3	4	3	3	2	2	3	4	3	3	2	2	3	4	280	280	1	17	NaN	NaN	NaN	NaN
Q7V1N8	Carbamoyl-phosphate synthase large chain	Central Metabolism	0.0238831	0.0234291	28.1341	28.1341	-1.84377e-05	1	7	7	7	40.7	40.7	40.7	26.828	0	118.36	1882700000	67	7	7	7	1	7	6	6	6	7	6	7	6	6	6	7	6	7	6	6	6	7	6	241	241	1	61	NaN	NaN	NaN	NaN
Q7V1N9	Uncharacterized protein	Uncharacterized	0.0294143	0.0325248	26.0591	26.2336	-0.17457	0.191417	27	27	27	48.5	48.5	48.5	67.795	0	266.28	7192500000	154	27	27	27	1	21	26	26	23	25	24	21	26	26	23	25	24	21	26	26	23	25	24	606	606	1	203	NaN	NaN	NaN	NaN
Q7V1P0	Ribosomal silencing factor RsfS	Basic Cellular Processes	0.0163574	0.0132298	24.3072	23.8371	0.470169	0.774621	53	53	53	57.2	57.2	57.2	121.48	0	323.31	22380000000	553	53	53	53	1	51	48	51	49	48	50	51	48	51	49	48	50	51	48	51	49	48	50	1099	1099	1	524	NaN	NaN	NaN	NaN
Q7V1P2	Uncharacterized protein	Uncharacterized	0.0212258	0.0193608	26.1876	26.0821	0.105523	0.447007	11	11	11	40.6	40.6	40.6	23.859	0	47.982	2943000000	79	11	11	11	1	10	10	10	11	10	11	10	10	10	11	10	11	10	10	10	11	10	11	212	212	1	95	NaN	NaN	NaN	NaN
Q7V1P7	Uncharacterized protein	Uncharacterized	0.0379381	0.0384809	25.3091	25.3564	-0.0472965	0.9294	3	3	3	23.7	23.7	23.7	13.116	0.00077399	3.0992	327150000	10	3	3	3	1	3	3	3	3	3	3	3	3	3	3	3	3	3	3	3	3	3	3	114	114	1	22	NaN	NaN	NaN	NaN
Q7V1P9	Rieske iron-sulfur protein 2Fe-2S subunit	Energy Production and Conversion	0.00142529	0.00164684	22.7428	22.9772	-0.234364	0.447165	13	13	13	47.4	47.4	47.4	35.862	0	84.851	1467700000	63	13	13	13	1	9	11	9	11	13	11	9	11	9	11	13	11	9	11	9	11	13	11	321	321	1	88	NaN	NaN	NaN	NaN
Q7V1Q0	Possible ABC transporter component, ATP-binding domain	Membrane Transport	0.0135429	0.0111054	25.2768	24.8082	0.46864	0.779695	4	4	4	46.9	46.9	46.9	11.569	0	6.2244	420280000	16	4	4	4	1	2	3	2	2	2	3	2	3	2	2	2	3	2	3	2	2	2	3	98	98	1	20	NaN	NaN	NaN	NaN
Q7V1Q2	Ferritin	Inorganic Nutrient Processing	0.211492	0.161682	28.6691	28.3424	0.326692	0.487294	3	3	3	8	8	8	52.14	0	11.305	96188000	15	3	3	3	1	3	3	3	3	2	3	3	3	3	3	2	3	3	3	3	3	2	3	440	440	1	19	NaN	NaN	NaN	NaN
Q7V1Q3	ABC transporter, ATP binding component, possibly iron transporter	Membrane Transport	0.0157437	0.0170124	25.875	26.0285	-0.153488	0.746117	3	3	3	9.3	9.3	9.3	30.926	0.00078247	3.5216	284940000	8	3	3	3	1	2	2	2	1	3	2	2	2	2	1	3	2	2	2	2	1	3	2	268	268	1	12	NaN	NaN	NaN	NaN
Q7V1Q5	Uncharacterized protein	Uncharacterized	0.0443675	0.0468513	26.699	26.8057	-0.106683	0.510119	11	11	11	57.6	57.6	57.6	21.064	0	83.209	13742000000	146	11	11	11	1	9	9	10	11	11	11	9	9	10	11	11	11	9	9	10	11	11	11	184	184	1	146	NaN	NaN	NaN	NaN
Q7V1Q6	Uncharacterized protein	Uncharacterized	0.0194598	0.0276655	23.5402	24.0875	-0.54728	0.756632	16	16	16	38.9	38.9	38.9	39.722	0	50.253	2241100000	57	16	16	16	1	12	13	12	13	13	13	12	13	12	13	13	13	12	13	12	13	13	13	352	352	1	88	NaN	NaN	NaN	NaN
Q7V1Q7	Uncharacterized protein	Uncharacterized	0.0327413	0.031229	26.1473	26.1115	0.0358283	0.893717	15	15	15	59.8	59.8	59.8	24.473	0	127.33	4217700000	111	15	15	15	1	10	13	14	13	12	13	10	13	14	13	12	13	10	13	14	13	12	13	219	219	1	124	NaN	NaN	NaN	NaN
Q7V1Q9	Possible mRNA binding protein	Basic Cellular Processes	0.119441	0.107756	28.6116	28.4912	0.120405	0.158857	2	2	2	45.2	45.2	45.2	7.2604	0	12.425	215880000	14	2	2	2	1	2	1	2	2	1	2	2	1	2	2	1	2	2	1	2	2	1	2	62	62	1	13	NaN	NaN	NaN	NaN
Q7V1R0	Uncharacterized protein	Uncharacterized	0.0164736	0.0155395	26.5724	26.5169	0.0555642	0.616152	6	6	6	48.8	48.8	48.8	22.756	0	45.904	1440700000	33	6	6	6	1	6	6	6	6	5	6	6	6	6	6	5	6	6	6	6	6	5	6	203	203	1	41	NaN	NaN	NaN	NaN
Q7V1R1	Uncharacterized protein	Uncharacterized	0.0121722	0.0114313	24.5504	24.4786	0.0718473	0.856314	28	28	28	73.9	73.9	73.9	35.443	0	177.49	9066500000	218	28	28	28	1	26	25	26	26	25	26	26	25	26	26	25	26	26	25	26	26	25	26	306	306	1	240	NaN	NaN	NaN	NaN
Q7V1R2	Uncharacterized protein	Uncharacterized	0.0621185	0.0597985	28.001	27.9767	0.0243397	0.881597	26	26	26	49.8	49.8	49.8	62.937	0	140.72	4133400000	139	26	26	26	1	23	19	22	18	19	21	23	19	22	18	19	21	23	19	22	18	19	21	540	540	1	140	NaN	NaN	NaN	NaN
Q7V1R3	Uncharacterized protein	Uncharacterized	0.0177601	0.016945	26.0596	26.0204	0.0391852	0.540259	4	4	4	40	40	40	20.028	0	24.091	451300000	19	4	4	4	1	3	2	3	3	2	4	3	2	3	3	2	4	3	2	3	3	2	4	180	180	1	22	NaN	NaN	NaN	NaN
Q7V1R5	Uncharacterized protein	Uncharacterized	0.289732	0.284823	29.1086	29.1116	-0.00294495	0.986168	18	18	18	49	49	49	44.281	0	123.56	5329100000	90	18	18	18	1	17	17	15	15	15	14	17	17	15	15	15	14	17	17	15	15	15	14	386	386	1	120	NaN	NaN	NaN	NaN
Q7V1R7	Glutamate 5-kinase	Central Metabolism	0.0182067	0.018361	26.1324	26.1727	-0.0403353	0.553649	20	20	20	46.2	46.2	46.2	40.748	0	75.982	1611200000	87	20	20	20	1	18	18	18	15	18	15	18	18	18	15	18	15	18	18	18	15	18	15	351	351	1	110	NaN	NaN	NaN	NaN
Q7V1R8	UDP-3-O-acylglucosamine N-acyltransferase	Central Metabolism	0.0170978	0.0166315	25.974	25.9643	0.00967344	0.956288	8	8	8	44.9	44.9	44.9	20.46	0	112.17	7998800000	64	8	8	8	1	6	7	8	6	8	8	6	7	8	6	8	8	6	7	8	6	8	8	178	178	1	66	NaN	NaN	NaN	NaN
Q7V1R9	3-isopropylmalate dehydrogenase	Central Metabolism	0.0189599	0.0182269	26.1778	26.1502	0.0275625	0.744393	22	22	22	63.1	63.1	63.1	39.474	0	156.65	3239900000	139	22	22	22	1	21	19	19	20	21	18	21	19	19	20	21	18	21	19	19	20	21	18	360	360	1	177	NaN	NaN	NaN	NaN
Q7V1S0	Phosphoribulokinase	Carbon Fixation	0.139901	0.134527	28.8063	28.7772	0.0291621	0.809291	7	7	7	20.6	20.6	20.6	37.014	0	38.916	982640000	40	7	7	7	1	6	5	5	4	4	5	6	5	5	4	4	5	6	5	5	4	4	5	344	344	1	37	NaN	NaN	NaN	NaN
Q7V1S1	Acetyl-coenzyme A carboxylase carboxyl transferase subunit beta	Central Metabolism	0.0476343	0.0490432	27.2152	27.2878	-0.072663	0.595423	18	18	18	61.9	61.9	61.9	39.033	0	117.11	3476900000	107	18	18	18	1	13	13	15	15	16	14	13	13	15	15	16	14	13	13	15	15	16	14	357	357	1	137	NaN	NaN	NaN	NaN
Q7V1S3	Putative oxidoreductase	Other	0.0206952	0.0196325	26.3406	26.297	0.0436471	0.819694	18	18	18	52.2	52.2	52.2	33.698	0	323.31	21096000000	238	18	18	18	1	18	17	18	17	18	18	18	17	18	17	18	18	18	17	18	17	18	18	299	299	1	260	NaN	NaN	NaN	NaN
Q7V1S4	Fructose-bisphosphate/sedoheptulose-1,7-bisphosph ate aldolase	Central Metabolism	0.7132	0.630109	31.4101	31.2616	0.148541	0.232531	18	18	18	65.1	65.1	65.1	32.446	0	97.876	6820100000	112	18	18	18	1	15	16	16	14	14	14	15	16	16	14	14	14	15	16	16	14	14	14	292	292	1	132	NaN	NaN	NaN	NaN
Q7V1S5	Phosphoribosylformylglycinamidine synthase subunit PurQ	Central Metabolism	0.0321723	0.0334436	26.2427	26.3336	-0.0909526	0.778383	19	19	19	55.9	55.9	55.9	41.297	0	83.448	3399600000	122	19	19	19	1	17	16	17	15	16	17	17	16	17	15	16	17	17	16	17	15	16	17	367	367	1	125	NaN	NaN	NaN	NaN
Q7V1S6	Phosphoribosylformylglycinamidine synthase subunit PurS	Central Metabolism	0.330698	0.322101	28.1891	28.1833	0.00579389	0.998992	23	23	23	72.5	72.5	72.5	39	0	311.18	172450000000	611	23	23	23	1	22	23	23	22	22	22	22	23	23	22	22	22	22	23	23	22	22	22	357	357	1	535	NaN	NaN	NaN	NaN
Q7V1S7	Putative cobalamin synthesis protein	Central Metabolism	0.0194681	0.0191734	26.1918	26.1982	-0.0064195	0.977892	8	8	8	59.7	59.7	59.7	24.127	0	32.503	1435000000	40	8	8	8	1	8	7	7	6	5	5	8	7	7	6	5	5	8	7	7	6	5	5	221	221	1	52	NaN	NaN	NaN	NaN
Q7V1S8	Uncharacterized protein	Uncharacterized	0.0181976	0.0194322	25.0488	25.1565	-0.107782	0.799845	4	4	4	59	59	59	9.3688	0	64.483	4221500000	48	4	4	4	1	4	4	4	4	4	4	4	4	4	4	4	4	4	4	4	4	4	4	83	83	1	53	NaN	NaN	NaN	NaN
Q7V1S9	Putative uracil phosphoribosyltransferase	Central Metabolism	0.0377042	0.0356386	26.3663	26.3157	0.0505765	0.814601	13	13	13	36.2	36.2	36.2	39.889	0	86.994	1423200000	77	13	13	13	1	12	13	11	10	11	10	12	13	11	10	11	10	12	13	11	10	11	10	351	351	1	78	NaN	NaN	NaN	NaN
Q7V1T0	Conserved hypothetical	Uncharacterized	0.0394326	0.0325444	25.3279	25.0672	0.260679	0.666556	2	2	2	21.2	21.2	21.2	18.691	0	36.585	328500000	7	2	2	2	1	2	2	2	2	2	2	2	2	2	2	2	2	2	2	2	2	2	2	170	170	1	12	NaN	NaN	NaN	NaN
Q7V1T1	Dihydroxy-acid dehydratase	Central Metabolism	0.0230914	0.0232555	27.1102	27.1469	-0.0366879	0.772237	13	13	13	78.5	78.5	78.5	23.181	0	66.337	3078400000	85	13	13	13	1	11	11	13	10	13	11	11	11	13	10	13	11	11	11	13	10	13	11	205	205	1	95	NaN	NaN	NaN	NaN
Q7V1T3	Uncharacterized protein	Uncharacterized	0.0468454	0.0484035	26.5061	26.5869	-0.0807985	0.756527	6	6	6	54.2	54.2	54.2	10.813	0	55.25	933260000	23	6	6	6	1	6	6	6	5	6	6	6	6	6	5	6	6	6	6	6	5	6	6	96	96	1	41	NaN	NaN	NaN	NaN
Q7V1T4	Putative 6-phosphogluconolactonase (DevB, Pgl)	Central Metabolism	0.0212879	0.0226386	25.8024	25.9197	-0.117357	0.15475	32	32	32	67.3	67.3	67.3	59.46	0	197.06	9525100000	294	32	32	32	1	26	29	29	30	29	28	26	29	29	30	29	28	26	29	29	30	29	28	559	559	1	306	NaN	NaN	NaN	NaN
Q7V1T5	6-phosphogluconate dehydrogenase, decarboxylating	Central Metabolism	0.150029	0.142862	29.5645	29.5235	0.0409838	0.775834	6	6	6	53.3	53.3	53.3	20.357	0	38.771	1331100000	46	6	6	6	1	5	5	4	5	5	4	5	5	4	5	5	4	5	5	4	5	5	4	182	182	1	40	NaN	NaN	NaN	NaN
Q7V1T6	ADP-glucose pyrophosphorylase	Central Metabolism	0.183951	0.161008	29.7275	29.5644	0.163158	0.239043	17	17	17	62.9	62.9	62.9	27.643	0	89.011	2239900000	88	17	17	17	1	13	14	12	16	13	14	13	14	12	16	13	14	13	14	12	16	13	14	245	245	1	106	NaN	NaN	NaN	NaN
Q7V1T7	Glutamyl-tRNA reductase	Photosynthesis	0.024619	0.0240218	26.8339	26.8269	0.00694911	0.929311	27	27	27	62.7	62.7	62.7	51.709	0	323.31	42305000000	357	27	27	27	1	26	26	26	25	26	26	26	26	26	25	26	26	26	26	26	25	26	26	472	472	1	358	NaN	NaN	NaN	NaN
Q7V1T8	D-fructose 1,6-bisphosphatase class 2/sedoheptulose 1,7-bisphosphatase	Central Metabolism	0.14457	0.12726	29.009	28.8532	0.155804	0.152533	39	39	39	69.6	69.6	69.6	48.073	0	323.31	58349000000	523	39	39	39	1	37	37	37	38	36	37	37	37	37	38	36	37	37	37	37	38	36	37	431	431	1	512	NaN	NaN	NaN	NaN
Q7V1T9	Ribulose-phosphate 3-epimerase	Carbon Fixation	0.0748708	0.0696446	27.6503	27.5756	0.0746702	0.524163	29	29	29	61.9	61.9	61.9	48.288	0	224.24	5744100000	147	29	29	29	1	23	24	22	23	23	23	23	24	22	23	23	23	23	24	22	23	23	23	433	433	1	164	NaN	NaN	NaN	NaN
Q7V1U1	Possible ABC transporter, ATP binding component	Membrane Transport	0.070875	0.0657199	27.5089	27.4377	0.0712496	0.845451	19	19	19	72.4	72.4	72.4	35.15	0	264.65	36978000000	409	19	19	19	1	15	14	16	16	18	16	15	14	16	16	18	16	15	14	16	16	18	16	333	333	1	366	NaN	NaN	NaN	NaN
Q7V1U2	Uncharacterized protein	Uncharacterized	0.00312618	0.00392235	22.0777	22.4309	-0.353156	0.431932	10	10	10	46.6	46.6	46.6	27.324	0	89.635	6678000000	91	10	10	10	1	10	10	10	10	9	9	10	10	10	10	9	9	10	10	10	10	9	9	251	251	1	109	NaN	NaN	NaN	NaN
Q7V1U3	Tyrosine binding protein	Central Metabolism	0.0559185	0.0534277	28.4881	28.4505	0.0375919	0.644403	12	12	12	60.7	60.7	60.7	26.743	0	76.925	3175200000	65	12	12	12	1	9	11	11	9	12	11	9	11	11	9	12	11	9	11	11	9	12	11	242	242	1	90	NaN	NaN	NaN	NaN
Q7V1U5	Aromatic-ring hydroxylase (Flavoprotein monooxygenase)	Photosynthesis	0.0798334	0.0768847	28.5643	28.5375	0.0268129	0.725139	1	1	1	7.9	7.9	7.9	14.818	0	6.6886	63387000	7	1	1	1	1	1	1	1	1	1	1	1	1	1	1	1	1	1	1	1	1	1	1	127	127	1	12	NaN	NaN	NaN	NaN
Q7V1U6	Glycine--tRNA ligase beta subunit	Basic Cellular Processes	0.0206433	0.0192235	27.3128	27.2385	0.0742569	0.382723	31	31	31	66.7	66.7	66.7	66.792	0	323.31	23409000000	371	31	31	31	1	29	28	31	27	28	28	29	28	31	27	28	28	29	28	31	27	28	28	600	600	1	380	NaN	NaN	NaN	NaN
Q7V1U7	Ferredoxin-sulfite reductase	Photosynthesis	0.032992	0.03307	27.7172	27.7487	-0.0315431	0.552545	31	31	31	77	77	77	49.47	0	213.32	18332000000	301	31	31	31	1	29	27	29	28	28	30	29	27	29	28	28	30	29	27	29	28	28	30	443	443	1	330	NaN	NaN	NaN	NaN
Q7V1U9	ATP-dependent DNA helicase RecG	Basic Cellular Processes	0.000739642	0.000824498	22.6803	22.8769	-0.196622	0.556139	47	47	47	56.2	56.2	56.2	82.783	0	235.15	12405000000	289	47	47	47	1	41	42	43	44	41	42	41	42	43	44	41	42	41	42	43	44	41	42	720	720	1	366	NaN	NaN	NaN	NaN
Q7V1V0	30S ribosomal protein S2	Basic Cellular Processes	0.0753186	0.0844634	27.5589	27.7512	-0.192284	0.245018	28	28	28	49	49	49	67.886	0	150.36	6188400000	181	28	28	28	1	24	24	28	25	26	25	24	24	28	25	26	25	24	24	28	25	26	25	596	596	1	200	NaN	NaN	NaN	NaN
Q7V1V1	Glycosyl transferase, family 2	Central Metabolism	0.0157374	0.016876	25.679	25.8102	-0.13124	0.511801	7	7	7	9.7	9.7	9.7	93.84	0	19.705	105750000	18	7	7	7	1	3	3	7	3	4	4	3	3	7	3	4	4	3	3	7	3	4	4	818	818	1	28	NaN	NaN	NaN	NaN
Q7V1V3	ABC transporter, ATP-binding component	Membrane Transport	0.0163645	0.0176673	25.3861	25.5228	-0.136705	0.721672	21	21	21	64.5	64.5	64.5	26.379	0	110.41	12111000000	194	21	21	21	1	21	21	21	21	21	21	21	21	21	21	21	21	21	21	21	21	21	21	234	234	1	222	NaN	NaN	NaN	NaN
Q7V1V4	ABC-transporter, membrane spanning component	Membrane Transport	0.0126824	0.0141166	25.7191	25.9092	-0.190091	0.607094	3	3	3	7.5	7.5	7.5	35.12	0	4.835	561240000	13	3	3	3	1	2	3	2	2	2	2	2	3	2	2	2	2	2	3	2	2	2	2	305	305	1	13	NaN	NaN	NaN	NaN
Q7V1V5	Possible ABC transporter component	Membrane Transport	0.00827463	0.00885868	24.7548	24.8786	-0.123856	0.458675	7	7	7	35	35	35	26.642	0	53.876	812140000	26	7	7	7	1	6	5	5	6	6	4	6	5	5	6	6	4	6	5	5	6	6	4	240	240	1	37	NaN	NaN	NaN	NaN
Q7V1V6	Possible Zn-dependent peptidase	Central Metabolism	0.00273467	0.00263631	23.6029	23.5801	0.0228182	0.928685	9	9	9	32.2	32.2	32.2	43.761	0	76.751	999770000	42	9	9	9	1	7	7	6	7	6	7	7	7	6	7	6	7	7	7	6	7	6	7	391	391	1	43	NaN	NaN	NaN	NaN
Q7V1V9	ATP-dependent zinc metalloprotease FtsH	Basic Cellular Processes	0.0982837	0.0921685	29.3866	29.3238	0.062816	0.466012	13	13	13	38.4	38.4	38.4	34.148	0	40.925	996410000	59	13	13	13	1	10	11	10	11	10	9	10	11	10	11	10	9	10	11	10	11	10	9	305	305	1	76	NaN	NaN	NaN	NaN
Q7V1W0	ATP-dependent Clp protease proteolytic subunit 1	Basic Cellular Processes	0.270574	0.270367	29.1485	29.1755	-0.0269515	0.633667	5	5	5	12.5	12.5	12.5	47.845	0	5.102	134490000	13	5	5	5	1	5	4	3	2	2	2	5	4	3	2	2	2	5	4	3	2	2	2	416	416	1	19	NaN	NaN	NaN	NaN
Q7V1W1	Protein Thf1	Other	0.0307796	0.0331152	26.0562	26.1888	-0.132607	0.250407	48	47	47	65.3	63.4	63.4	68.884	0	323.31	50767000000	621	48	47	47	1	47	46	48	46	46	46	46	45	47	45	45	45	46	45	47	45	45	45	637	637	1	574	NaN	NaN	NaN	NaN
Q7V1W4	Conserved hypothetical	Uncharacterized	0.0235268	0.022892	24.4801	24.473	0.007061	0.992937	10	10	10	58.2	58.2	58.2	21.873	0	126.94	16570000000	162	10	10	10	1	9	10	10	10	10	9	9	10	10	10	10	9	9	10	10	10	10	9	196	196	1	133	NaN	NaN	NaN	NaN
Q7V1W5	Hypothetical membrane protein	Uncharacterized	0.0356326	0.0352413	25.7878	25.7992	-0.0114638	0.972182	18	18	18	56.9	56.9	56.9	23.535	0	51.647	3203800000	104	18	18	18	1	15	16	17	14	16	16	15	16	17	14	16	16	15	16	17	14	16	16	202	202	1	142	NaN	NaN	NaN	NaN
Q7V1W7	Uncharacterized protein	Uncharacterized	0.0238799	0.0248351	26.8063	26.8886	-0.0822703	0.635776	6	6	6	44.9	44.9	44.9	10.67	0	28.015	386080000	23	6	6	6	1	5	6	5	5	5	5	5	6	5	5	5	5	5	6	5	5	5	5	89	89	1	37	NaN	NaN	NaN	NaN
Q7V1X3	Phosphate import ATP-binding protein PstB	Membrane Transport	0.0142189	0.0139021	25.3478	25.3413	0.00649834	0.99948	3	3	3	23.4	23.4	23.4	17.183	0	10.374	581390000	11	3	3	3	1	3	3	2	3	3	3	3	3	2	3	3	3	3	3	2	3	3	3	145	145	1	20	NaN	NaN	NaN	NaN
Q7V1X6	Uncharacterized protein	Uncharacterized	0.0431086	0.0451208	25.1348	25.2417	-0.106921	0.800571	26	26	26	50.7	50.7	50.7	51.083	0	153.01	3487600000	145	26	26	26	1	22	22	22	23	22	22	22	22	22	23	22	22	22	22	22	23	22	22	438	438	1	164	NaN	NaN	NaN	NaN
Q7V1X7	Uncharacterized protein	Uncharacterized	0.0849447	0.0731592	26.5184	26.3311	0.18731	0.428976	12	12	12	57.6	57.6	57.6	30.04	0	72.908	939930000	46	12	12	12	1	8	11	8	8	11	9	8	11	8	8	11	9	8	11	8	8	11	9	269	269	1	66	NaN	NaN	NaN	NaN
Q7V1Y1	Bacterial regulatory proteins, ArsR family	Basic Cellular Processes	0.00486894	0.0049221	22.6944	22.7537	-0.0593274	0.939324	2	2	2	27.3	27.3	27.3	8.2566	0	18.756	572850000	29	2	2	2	1	2	2	2	2	2	2	2	2	2	2	2	2	2	2	2	2	2	2	77	77	1	26	NaN	NaN	NaN	NaN
Q7V1Y2	Glyceraldehyde-3-phosphate dehydrogenase	Central Metabolism	0.0203816	0.0192234	26.2094	26.1563	0.0531267	0.75271	3	3	3	44.6	44.6	44.6	11.34	0	39.702	1505500000	33	3	3	3	1	3	3	3	3	3	3	3	3	3	3	3	3	3	3	3	3	3	3	101	101	1	31	NaN	NaN	NaN	NaN
Q7V1Y3	Multidrug efflux transporter, MFS family	Membrane Transport	0.00621518	0.0044634	24.8008	24.1638	0.636981	0.633561	4	4	4	29.4	29.4	29.4	14.757	0	8.9781	96948000	16	4	4	4	1	3	4	3	3	4	4	3	4	3	3	4	4	3	4	3	3	4	4	126	126	1	22	NaN	NaN	NaN	NaN
Q7V1Y5	Phosphate-binding protein	Membrane Transport	0.971046	0.895374	31.7114	31.6241	0.0873318	0.446355	17	17	17	71.5	71.5	71.5	37.941	0	151.76	4492600000	117	17	17	17	1	15	16	16	16	15	16	15	16	16	16	15	16	15	16	16	16	15	16	340	340	1	138	NaN	NaN	NaN	NaN
Q7V1Y7	Putative secreted protein	Other	0.0100112	0.00934664	26.3468	26.2752	0.0715834	0.539957	4	4	4	13.1	13.1	13.1	46.296	0	4.071	258800000	7	4	4	4	1	3	2	3	2	3	3	3	2	3	2	3	3	3	2	3	2	3	3	419	419	1	17	NaN	NaN	NaN	NaN
Q7V1Y8	Two-component sensor histidine kinase, phosphate sensing	Inorganic Nutrient Processing	0.00685309	0.00566227	24.7973	24.5521	0.245251	0.51573	27	27	27	77.7	77.7	77.7	33.886	0	323.31	133640000000	612	27	27	27	1	26	26	27	26	23	27	26	26	27	26	23	27	26	26	27	26	23	27	323	323	1	477	NaN	NaN	NaN	NaN
Q7V1Y9	Two-component response regulator, phosphate	Inorganic Nutrient Processing	0.0100781	0.00930706	24.6784	24.6192	0.0592155	0.927988	29	29	29	43.7	43.7	43.7	82.608	0	182.02	4721100000	172	29	29	29	1	28	29	27	26	25	27	28	29	27	26	25	27	28	29	27	26	25	27	760	760	1	215	NaN	NaN	NaN	NaN
Q7V1Z0	Putative potassium channel, VIC family	Membrane Transport	0.031507	0.0284975	26.8865	26.77	0.116463	0.236404	8	8	8	26.4	26.4	26.4	44.468	0	18.374	651660000	34	8	8	8	1	8	7	7	7	8	5	8	7	7	7	8	5	8	7	7	7	8	5	382	382	1	45	NaN	NaN	NaN	NaN
Q7V1Z2	Possible DUP family	Other	0.101925	0.115241	27.0952	27.3213	-0.226076	0.699375	7	7	7	31.8	31.8	31.8	27.788	0	38.316	557990000	25	7	7	7	1	6	5	6	5	4	6	6	5	6	5	4	6	6	5	6	5	4	6	242	242	1	42	NaN	NaN	NaN	NaN
Q7V1Z5	Conserved hypothetical	Uncharacterized	0.0133004	0.0156931	23.4305	23.7315	-0.300913	0.633856	13	13	13	36.5	36.5	36.5	39.024	0	147.94	4526800000	91	13	13	13	1	11	11	12	11	11	12	11	11	12	11	11	12	11	11	12	11	11	12	351	351	1	89	NaN	NaN	NaN	NaN
Q7V1Z7	Possible D12 class N6 adenine-specific DNA met	Other	0.00906325	0.0120185	22.8377	23.2956	-0.457969	0.411785	6	6	6	43	43	43	15.373	0	32.774	1410700000	29	6	6	6	1	4	4	4	5	6	4	4	4	4	5	6	4	4	4	4	5	6	4	128	128	1	27	NaN	NaN	NaN	NaN
Q7V1Z9	Glutamine amidotransferase class-I	Central Metabolism	0.00475482	0.00409715	23.609	23.4312	0.177823	0.633338	1	1	1	26.9	26.9	26.9	8.3846	0	55.357	140880000	9	1	1	1	1	1	1	1	1	1	1	1	1	1	1	1	1	1	1	1	1	1	1	78	78	1	15	NaN	NaN	NaN	NaN
Q7V200	Short-chain dehydrogenase/reductase (SDR) superfamily	Central Metabolism	0.104761	0.111326	27.9527	28.0681	-0.115344	0.245224	2	2	2	22.7	22.7	22.7	8.5679	0.0015291	2.881	72105000	9	2	2	2	1	1	2	2	1	2	2	1	2	2	1	2	2	1	2	2	1	2	2	75	75	1	11	NaN	NaN	NaN	NaN
Q7V208	N5-carboxyaminoimidazole ribonucleotide synthase	Central Metabolism	0.153361	0.14637	29.3417	29.3046	0.03711	0.8104	6	6	6	27.7	27.7	27.7	27.759	0	18.052	232040000	22	6	6	6	1	5	5	5	5	4	4	5	5	5	5	4	4	5	5	5	5	4	4	242	242	1	35	NaN	NaN	NaN	NaN
Q7V209	3-dehydroquinate synthase	Central Metabolism	0.134906	0.138724	29.0338	29.1014	-0.0676104	0.50068	9	9	9	51.1	51.1	51.1	24.394	0	65.82	3275400000	65	9	9	9	1	7	7	8	8	8	8	7	7	8	8	8	8	7	7	8	8	8	8	221	221	1	78	NaN	NaN	NaN	NaN
Q7V210	Uncharacterized protein	Uncharacterized	0.012203	0.0127487	25.6921	25.7826	-0.0905164	0.413971	24	24	24	53.8	53.8	53.8	45.293	0	195.55	12447000000	178	24	24	24	1	21	21	23	21	19	20	21	21	23	21	19	20	21	21	23	21	19	20	396	396	1	197	NaN	NaN	NaN	NaN
Q7V211	Uncharacterized protein	Uncharacterized	0.0115457	0.00887494	25.0201	24.682	0.338076	0.298425	22	22	22	55.4	55.4	55.4	40.622	0	118.97	9599000000	137	22	22	22	1	20	20	20	20	22	20	20	20	20	20	22	20	20	20	20	20	22	20	363	363	1	160	NaN	NaN	NaN	NaN
Q7V212	Putative transcripton factor	Basic Cellular Processes	0.00359821	0.00303808	23.3995	23.2539	0.145668	0.890248	9	9	9	30.6	30.6	30.6	45.076	0	58.786	1653800000	49	9	9	9	1	8	8	8	8	8	8	8	8	8	8	8	8	8	8	8	8	8	8	396	396	1	59	NaN	NaN	NaN	NaN
Q7V213	Quinolinate synthase A	Central Metabolism	0.00542038	0.0054646	24.1393	24.1779	-0.0386658	0.867738	9	9	9	40.4	40.4	40.4	29.355	0	57.977	677950000	38	9	9	9	1	6	7	7	5	7	7	6	7	7	5	7	7	6	7	7	5	7	7	265	265	1	47	NaN	NaN	NaN	NaN
Q7V214	Carboxyl-terminal processing protease	Central Metabolism	0.0265657	0.0245598	26.926	26.8449	0.0810318	0.641371	3	3	3	14.5	14.5	14.5	32.528	0	9.9588	110080000	11	3	3	3	1	2	2	1	2	3	3	2	2	1	2	3	3	2	2	1	2	3	3	289	289	1	14	NaN	NaN	NaN	NaN
Q7V215	4-hydroxy-3-methylbut-2-en-1-yl diphosphate synthase (ferredoxin)	Central Metabolism	0.0247771	0.0248923	26.7446	26.7807	-0.0361767	0.886845	5	5	5	24.3	24.3	24.3	34.16	0	18.061	312100000	27	5	5	5	1	3	5	3	4	3	4	3	5	3	4	3	4	3	5	3	4	3	4	304	304	1	28	NaN	NaN	NaN	NaN
Q7V217	Aminotransferas	Central Metabolism	0.0709851	0.0682803	28.2217	28.1942	0.0274385	0.436013	15	15	15	36.1	36.1	36.1	47.962	0	109.69	2765100000	93	15	15	15	1	14	14	14	14	13	14	14	14	14	14	13	14	14	14	14	14	13	14	429	429	1	94	NaN	NaN	NaN	NaN
Q7V218	Putative phosphonate binding protein for ABC transporter	Membrane Transport	0.0105463	0.0110785	25.0856	25.1815	-0.0959059	0.667078	22	22	22	59.3	59.3	59.3	45.022	0	104.97	3284300000	135	22	22	22	1	15	21	19	19	17	16	15	21	19	19	17	16	15	21	19	19	17	16	405	405	1	157	NaN	NaN	NaN	NaN
Q7V219	Putative phosphonate ABC transporter	Membrane Transport	0.0431144	0.0417865	26.8197	26.8038	0.0159124	0.891276	32	32	32	75.6	75.6	75.6	43.908	0	323.31	17249000000	266	32	32	32	1	28	30	28	29	30	29	28	30	28	29	30	29	28	30	28	29	30	29	393	393	1	290	NaN	NaN	NaN	NaN
Q7V223	Ribosomal RNA small subunit methyltransferase E	Basic Cellular Processes	0.0160844	0.0159419	25.4223	25.4789	-0.056605	0.952532	9	9	9	43.2	43.2	43.2	34.175	0	54.79	1155200000	48	9	9	9	1	7	7	8	8	8	6	7	7	8	8	8	6	7	7	8	8	8	6	301	301	1	57	NaN	NaN	NaN	NaN
Q7V224	Uncharacterized protein	Uncharacterized	0.141655	0.0884199	27.7971	26.209	1.58806	0.661705	12	12	12	49.4	49.4	49.4	27.936	0	115.17	1326500000	58	12	12	12	1	9	9	9	11	9	10	9	9	9	11	9	10	9	9	9	11	9	10	245	245	1	67	NaN	NaN	NaN	NaN
Q7V225	Possible ABC transporter, ATP-binding component	Membrane Transport	0.0165637	0.0190102	25.2502	25.4772	-0.226951	0.258677	6	6	6	25.3	25.3	25.3	29.72	0	22.276	774740000	29	6	6	6	1	5	6	4	4	4	5	5	6	4	4	4	5	5	6	4	4	4	5	257	257	1	36	NaN	NaN	NaN	NaN
Q7V226	33 kDa chaperonin	Basic Cellular Processes	0.0197923	0.0213188	25.9883	26.1247	-0.136387	0.287706	4	4	4	48.3	48.3	48.3	17.096	0	6.5265	1545700000	8	4	4	4	1	3	3	3	2	2	3	3	3	3	2	2	3	3	3	3	2	2	3	147	147	1	16	NaN	NaN	NaN	NaN
Q7V227	Uncharacterized protein	Uncharacterized	0.0120004	0.0138639	24.8448	25.0823	-0.237437	0.241981	10	10	10	47.9	47.9	47.9	24.248	0	39.899	995700000	46	10	10	10	1	8	9	9	8	8	9	8	9	9	8	8	9	8	9	9	8	8	9	215	215	1	65	NaN	NaN	NaN	NaN
Q7V228	Peptide chain release factor 3	Basic Cellular Processes	0.0331519	0.0321077	27.5952	27.577	0.0181459	0.785626	18	18	18	58	58	58	33.348	0	87.009	3445400000	124	18	18	18	1	18	18	17	17	17	17	18	18	17	17	17	17	18	18	17	17	17	17	300	300	1	143	NaN	NaN	NaN	NaN
Q7V229	Uncharacterized protein	Uncharacterized	0.0145083	0.014654	25.1594	25.2057	-0.0463123	0.894048	8	8	8	34.4	34.4	34.4	24.873	0	28.786	546420000	40	8	8	8	1	4	6	6	7	5	5	4	6	6	7	5	5	4	6	6	7	5	5	224	224	1	40	NaN	NaN	NaN	NaN
Q7V230	Ribonucleotide reductase (Class II)	Basic Cellular Processes	0.0328835	0.031075	28.1407	28.0874	0.053325	0.549511	26	26	26	45.3	45.3	45.3	61.821	0	197.07	9500700000	229	26	26	26	1	25	25	24	24	24	25	25	25	24	24	24	25	25	25	24	24	24	25	545	545	1	253	NaN	NaN	NaN	NaN
Q7V232	Pseudouridine synthase	Central Metabolism	0.093405	0.0944415	27.8933	27.95	-0.0566591	0.888334	7	7	7	36.8	36.8	36.8	26.644	0	40.011	801320000	56	7	7	7	1	7	7	7	7	6	6	7	7	7	7	6	6	7	7	7	7	6	6	231	231	1	59	NaN	NaN	NaN	NaN
Q7V237	Possible VHS domain	Other	0.00957661	0.0114765	24.0672	24.3593	-0.292096	0.515663	51	51	51	64.2	64.2	64.2	90.661	0	323.31	21937000000	421	51	51	51	1	44	44	48	46	42	43	44	44	48	46	42	43	44	44	48	46	42	43	802	802	1	432	NaN	NaN	NaN	NaN
Q7V239	Pentapeptide repeats	Other	0.0113522	0.0127651	24.0745	24.4506	-0.376046	0.811432	7	7	7	37.1	37.1	37.1	27.753	0	16.56	1940700000	26	7	7	7	1	5	4	6	5	2	4	5	4	6	5	2	4	5	4	6	5	2	4	240	240	1	30	NaN	NaN	NaN	NaN
Q7V240	Glucose-methanol-choline (GMC) oxidoreductase:NAD binding site	Central Metabolism	0.00410533	0.0039142	24.5894	24.5312	0.0581773	0.92998	8	8	8	45.5	45.5	45.5	18.787	0	41.19	425210000	39	8	8	8	1	7	6	7	6	7	6	7	6	7	6	7	6	7	6	7	6	7	6	165	165	1	41	NaN	NaN	NaN	NaN
Q7V243	FAD linked oxidase, N-terminal	Other	0.00509893	0.00432564	24.5327	24.2729	0.259793	0.744597	3	3	3	28.7	28.7	28.7	17.432	0	9.273	288220000	7	3	3	3	1	3	3	3	3	2	2	3	3	3	3	2	2	3	3	3	3	2	2	157	157	1	17	NaN	NaN	NaN	NaN
Q7V244	Putative sulfate transporter	Membrane Transport	0.0381956	0.0349997	27.7363	27.6368	0.0995255	0.562937	10	10	10	21	21	21	61.043	0	37.69	488390000	49	10	10	10	1	8	8	9	6	8	7	8	8	9	6	8	7	8	8	9	6	8	7	548	548	1	52	NaN	NaN	NaN	NaN
Q7V245	Putative homoserine O-succinyltransferase	Central Metabolism	0.00800686	0.00724349	24.6629	24.5467	0.116119	0.469843	11	11	11	32.5	32.5	32.5	48.631	0	32.775	549640000	41	11	11	11	1	8	10	8	9	9	6	8	10	8	9	9	6	8	10	8	9	9	6	425	425	1	55	NaN	NaN	NaN	NaN
Q7V246	Uncharacterized protein	Uncharacterized	0.110636	0.106522	28.0185	27.992	0.0265611	0.744929	4	4	4	5.6	5.6	5.6	55.721	0	21.809	2543100000	24	4	4	4	1	4	4	4	4	4	4	4	4	4	4	4	4	4	4	4	4	4	4	522	522	1	24	NaN	NaN	NaN	NaN
Q7V247	Uncharacterized protein	Uncharacterized	0.0222587	0.0195466	26.9173	26.7599	0.157362	0.227324	12	12	12	34.1	34.1	34.1	34.032	0	36.825	1062400000	87	12	12	12	1	11	11	9	10	11	11	11	11	9	10	11	11	11	11	9	10	11	11	296	296	1	96	NaN	NaN	NaN	NaN
Q7V248	Putative glucosylglycerolphosphate phosphatase	Central Metabolism	0.00649589	0.00644274	24.8071	24.8224	-0.0152308	0.951877	20	20	20	75.8	75.8	75.8	26.144	0	119.38	7441900000	136	20	20	20	1	19	20	19	18	19	20	19	20	19	18	19	20	19	20	19	18	19	20	219	219	1	158	NaN	NaN	NaN	NaN
Q7V250	Ferric uptake regulator family	Basic Cellular Processes	0.014434	0.0118666	24.5292	24.2797	0.249468	0.299623	21	21	21	37.2	37.2	37.2	57.871	0	107.18	4894500000	170	21	21	21	1	20	19	20	21	21	20	20	19	20	21	21	20	20	19	20	21	21	20	508	508	1	189	NaN	NaN	NaN	NaN
Q7V251	Isochorismatase hydrolase family	Central Metabolism	0.0353429	0.0395589	26.128	26.3183	-0.190285	0.307154	7	7	7	21.3	21.3	21.3	45.636	0	36.918	821620000	33	7	7	7	1	6	6	6	6	7	5	6	6	6	6	7	5	6	6	6	6	7	5	403	403	1	42	NaN	NaN	NaN	NaN
Q7V252	Small mechanosensitive ion channel, MscS family	Membrane Transport	0.0559148	0.0505359	27.6785	27.5632	0.115233	0.447472	4	4	4	40	40	40	16.607	0	14.368	417870000	17	4	4	4	1	4	4	4	4	3	4	4	4	4	4	3	4	4	4	4	4	3	4	150	150	1	23	NaN	NaN	NaN	NaN
Q7V253	Possible light-dependent protochlorophyllide oxido-reductase	Photosynthesis	0.00897938	0.00881522	24.9998	25.0011	-0.00132179	1	9	9	9	55.1	55.1	55.1	21	0	87.575	1475200000	59	9	9	9	1	8	9	8	9	9	8	8	9	8	9	9	8	8	9	8	9	9	8	185	185	1	71	NaN	NaN	NaN	NaN
Q7V254	Putative lycopene epsilon cyclase	Central Metabolism	0.013362	0.0130984	25.9294	25.9317	-0.00230535	0.999142	10	10	10	35.3	35.3	35.3	38.927	0	100.24	5537200000	92	10	10	10	1	7	9	9	9	8	8	7	9	9	9	8	8	7	9	9	9	8	8	343	343	1	96	NaN	NaN	NaN	NaN
Q7V255	Short-chain dehydrogenase/reductase (SDR) superfamily	Central Metabolism	0.00588244	0.00623767	23.8811	23.9988	-0.117701	0.554807	7	7	7	25.5	25.5	25.5	38.046	0	22.015	838020000	32	7	7	7	1	7	5	6	6	6	6	7	5	6	6	6	6	7	5	6	6	6	6	333	333	1	46	NaN	NaN	NaN	NaN
Q7V263	Histidine--tRNA ligase	Basic Cellular Processes	0.0312518	0.0294232	27.1622	27.1061	0.0560665	0.633572	9	9	9	30.9	30.9	30.9	48.899	0	62.239	930640000	38	9	9	9	1	5	6	9	5	5	6	5	6	9	5	5	6	5	6	9	5	5	6	427	427	1	43	NaN	NaN	NaN	NaN
Q7V264	Uncharacterized protein	Uncharacterized	0.00531244	0.00220896	22.502	21.7213	0.780713	0.702572	8	8	8	33.6	33.6	33.6	26.197	0	36.275	404210000	42	8	8	8	1	6	7	7	7	7	6	6	7	7	7	7	6	6	7	7	7	7	6	235	235	1	43	NaN	NaN	NaN	NaN
Q7V266	Uncharacterized protein	Uncharacterized	0.0121156	0.0118205	24.9576	24.9473	0.0103054	0.982399	27	27	27	62.5	62.5	62.5	49.169	0	175.71	9585800000	243	27	27	27	1	25	26	25	25	27	24	25	26	25	25	27	24	25	26	25	25	27	24	429	429	1	264	NaN	NaN	NaN	NaN
Q7V267	Acetyl-coenzyme A synthetase	Central Metabolism	0.0399623	0.036254	28.1407	28.0287	0.112021	0.138345	2	2	2	17.5	17.5	17.5	14.471	0	7.733	38597000	4	2	2	2	1	2	2	1	2	2	2	2	2	1	2	2	2	2	2	1	2	2	2	137	137	1	11	NaN	NaN	NaN	NaN
Q7V268	Polyprenyl synthetase solanesyl diphosphate synthase (Sds)	Central Metabolism	0.091526	0.0897529	28.3047	28.3052	-0.000506083	1	7	7	7	30.4	30.4	30.4	27.762	0	14.44	506210000	25	7	7	7	1	4	5	5	5	6	4	4	5	5	5	6	4	4	5	5	5	6	4	240	240	1	32	NaN	NaN	NaN	NaN
Q7V270	Possible nitrilase	Inorganic Nutrient Processing	0.0381634	0.0366267	26.8054	26.7804	0.025025	0.936808	45	45	45	58.6	58.6	58.6	74.452	0	323.31	28349000000	442	45	45	45	1	43	43	44	43	42	43	43	43	44	43	42	43	43	43	44	43	42	43	660	660	1	462	NaN	NaN	NaN	NaN
Q7V271	2-phosphosulfolactate phosphatase	Central Metabolism	0.0557755	0.0595988	26.949	27.0721	-0.123076	0.259529	16	16	16	53.9	53.9	53.9	35.912	0	91.221	4382800000	104	16	16	16	1	13	15	13	13	15	14	13	15	13	13	15	14	13	15	13	13	15	14	323	323	1	118	NaN	NaN	NaN	NaN
Q7V272	3-phosphoshikimate 1-carboxyvinyltransferase	Central Metabolism	0.0208882	0.0191985	26.6124	26.5195	0.0929082	0.400816	15	15	15	62.2	62.2	62.2	30.465	0	230.44	5189700000	139	15	15	15	1	13	15	15	13	13	13	13	15	15	13	13	13	13	15	15	13	13	13	275	275	1	149	NaN	NaN	NaN	NaN
Q7V274	Bifunctional protein GlmU	Other	0.143939	0.131709	29.4337	29.334	0.0997696	0.239101	6	6	6	27.5	27.5	27.5	22.902	0	46.431	1818800000	44	6	6	6	1	5	5	5	4	4	6	5	5	5	4	4	6	5	5	5	4	4	6	207	207	1	51	NaN	NaN	NaN	NaN
Q7V275	Glycogen synthase	Central Metabolism	0.0550765	0.0511039	28.1528	28.0736	0.0792363	0.458646	28	28	28	68.7	68.7	68.7	46.888	0	136.3	5285300000	190	28	28	28	1	25	25	25	23	26	23	25	25	25	23	26	23	25	25	25	23	26	23	438	438	1	208	NaN	NaN	NaN	NaN
Q7V276	1,4-dihydroxy-2-naphthoyl-CoA synthase	Central Metabolism	0.0425314	0.037724	27.016	26.8739	0.142152	0.411293	28	28	28	70.6	70.6	70.6	49.749	0	184.4	10515000000	177	28	28	28	1	23	21	24	24	26	23	23	21	24	24	26	23	23	21	24	24	26	23	449	449	1	204	NaN	NaN	NaN	NaN
Q7V277	2-succinyl-5-enolpyruvyl-6-hydroxy-3-cyclohexene-1-carboxylate synthase	Central Metabolism	0.0101535	0.00985774	25.9968	25.9823	0.0145226	0.927223	32	32	32	66.5	66.5	66.5	54.923	0	277.27	14318000000	266	32	32	32	1	31	31	32	32	30	31	31	31	32	32	30	31	31	31	32	32	30	31	483	483	1	300	NaN	NaN	NaN	NaN
Q7V278	Signal peptidase I	Membrane Transport	0.00394518	0.0026121	22.7964	22.2984	0.498028	0.818988	16	16	16	64.2	64.2	64.2	31.549	0	131.39	4852500000	93	16	16	16	1	12	15	15	14	13	13	12	15	15	14	13	13	12	15	15	14	13	13	285	285	1	115	NaN	NaN	NaN	NaN
Q7V280	Uncharacterized protein	Uncharacterized	0.0246306	0.0222629	26.6763	26.5538	0.122552	0.564543	28	28	28	45.4	45.4	45.4	66.111	0	103.82	3728900000	146	28	28	28	1	25	25	24	25	24	25	25	25	24	25	24	25	25	25	24	25	24	25	588	588	1	180	NaN	NaN	NaN	NaN
Q7V282	ABC transporter, ATP binding domain, possibly Mn transporter	Membrane Transport	0.00981267	0.0133227	24.3329	25.2027	-0.86982	0.682473	1	1	1	6.2	6.2	6.2	22.26	0.00076864	2.9854	31863000	6	1	1	1	1	1	1	1	1	1	1	1	1	1	1	1	1	1	1	1	1	1	1	194	194	1	9	NaN	NaN	NaN	NaN
Q7V283	ABC transporter, substrate binding protein, possibly Mn	Membrane Transport	0.00853766	0.0081527	24.769	24.7341	0.0348466	0.939634	12	12	12	26.3	26.3	26.3	44.761	0	51.019	1612100000	66	12	12	12	1	10	10	11	10	9	9	10	10	11	10	9	9	10	10	11	10	9	9	388	388	1	80	NaN	NaN	NaN	NaN
Q7V285	Uncharacterized protein	Uncharacterized	0.0857508	0.0911636	27.1108	27.2311	-0.120267	0.433787	4	4	4	23.2	23.2	23.2	28.126	0	19.417	544030000	19	4	4	4	1	4	3	4	4	4	3	4	3	4	4	4	3	4	3	4	4	4	3	254	254	1	23	NaN	NaN	NaN	NaN
Q7V286	Tryptophan--tRNA ligase	Basic Cellular Processes	0.0254873	0.023928	26.5213	26.4638	0.0575186	0.783516	9	9	9	34	34	34	33.754	0	31.837	646160000	42	9	9	9	1	7	8	8	7	6	9	7	8	8	7	6	9	7	8	8	7	6	9	300	300	1	50	NaN	NaN	NaN	NaN
Q7V287	Threonine--tRNA ligase	Basic Cellular Processes	0.0161353	0.0163447	26.7839	26.8306	-0.0466709	0.446497	10	10	10	62.9	62.9	62.9	17.211	0	69.02	4886800000	89	10	10	10	1	7	7	7	8	7	8	7	7	7	8	7	8	7	7	7	8	7	8	151	151	1	101	NaN	NaN	NaN	NaN
Q7V288	Putative glucokinase	Central Metabolism	0.00535571	0.00545066	24.3052	24.3588	-0.0536359	0.48806	16	16	16	39.3	39.3	39.3	38.463	0	90.845	4855200000	135	16	16	16	1	14	15	15	15	15	15	14	15	15	15	15	15	14	15	15	15	15	15	338	338	1	146	NaN	NaN	NaN	NaN
Q7V289	Homoserine kinase	Central Metabolism	0.0368772	0.0377844	26.9571	27.0204	-0.0633176	0.525729	38	38	38	53.6	53.6	53.6	74.078	0	179.83	7085200000	256	38	38	38	1	35	35	33	35	35	32	35	35	33	35	35	32	35	35	33	35	35	32	638	638	1	273	NaN	NaN	NaN	NaN
Q7V290	Peptidase family M3	Membrane Transport	0.0283126	0.0255166	27.7133	27.5959	0.117427	0.510229	10	10	10	27.2	27.2	27.2	38.556	0	57.662	533460000	44	10	10	10	1	6	9	7	6	7	6	6	9	7	6	7	6	6	9	7	6	7	6	345	345	1	44	NaN	NaN	NaN	NaN
Q7V291	Lipase family protein	Central Metabolism	0.00567135	0.00534606	23.5734	23.4631	0.110257	0.928774	10	10	10	44.4	44.4	44.4	33.693	0	69.525	4189100000	73	10	10	10	1	9	9	9	10	9	9	9	9	9	10	9	9	9	9	9	10	9	9	315	315	1	81	NaN	NaN	NaN	NaN
Q7V292	7,8-dihydroneopterin aldolase	Central Metabolism	0.0283452	0.0281537	25.1857	25.2024	-0.0166759	0.950853	44	44	44	61.4	61.4	61.4	80.149	0	323.31	13741000000	317	44	44	44	1	37	38	39	38	40	37	37	38	39	38	40	37	37	38	39	38	40	37	695	695	1	350	NaN	NaN	NaN	NaN
Q7V293	Gamma-glutamyl phosphate reductase	Central Metabolism	0.0428623	0.0354959	27.6426	27.4002	0.242413	0.129143	3	3	3	18.3	18.3	18.3	22.719	0	11.63	125960000	11	3	3	3	1	3	3	3	2	2	1	3	3	3	2	2	1	3	3	3	2	2	1	197	197	1	14	NaN	NaN	NaN	NaN
Q7V294	Conserved hypothetical	Uncharacterized	0.00434198	0.00414806	25.9269	25.8933	0.0336266	0.911258	4	4	4	26.7	26.7	26.7	14.045	0	7.468	633550000	19	4	4	4	1	3	3	3	4	3	3	3	3	3	4	3	3	3	3	3	4	3	3	120	120	1	20	NaN	NaN	NaN	NaN
Q7V295	Uncharacterized protein	Uncharacterized	0.0137706	0.0156802	24.4347	24.6387	-0.204015	0.574746	26	26	26	65.4	65.4	65.4	48.304	0	307.58	14038000000	270	26	26	26	1	25	26	26	25	25	26	25	26	26	25	25	26	25	26	26	25	25	26	436	436	1	282	NaN	NaN	NaN	NaN
Q7V297	Conserved hypothetical	Uncharacterized	0.0123159	0.0118228	23.4562	23.4902	-0.0340646	0.983299	47	47	47	40.7	40.7	40.7	149.6	0	208.08	4563400000	206	47	47	47	1	40	42	41	37	38	38	40	42	41	37	38	38	40	42	41	37	38	38	1314	1314	1	268	NaN	NaN	NaN	NaN
Q7V298	Uncharacterized protein	Uncharacterized	0.0242413	0.0208203	27.0854	26.8977	0.187674	0.414486	3	3	3	32.7	32.7	32.7	16.63	0	17.594	342940000	20	3	3	3	1	1	1	3	2	1	2	1	1	3	2	1	2	1	1	3	2	1	2	147	147	1	21	NaN	NaN	NaN	NaN
Q7V299	1,4-alpha-glucan branching enzyme GlgB	Central Metabolism	0.0249335	0.023235	27.6526	27.5775	0.0750999	0.539922	2	2	2	15.9	15.9	15.9	9.6652	0.0088561	1.8822	67838000	8	2	2	2	1	2	2	2	2	0	2	2	2	2	2	0	2	2	2	2	2	0	2	88	88	1	10	NaN	NaN	NaN	NaN
Q7V2A0	Uroporphyrinogen decarboxylase	Central Metabolism	0.0900339	0.086714	28.3791	28.3552	0.0238864	0.867596	13	13	13	27.8	27.8	27.8	59.393	0	57.392	2089000000	66	13	13	13	1	10	11	8	10	9	10	10	11	8	10	9	10	10	11	8	10	9	10	525	525	1	70	NaN	NaN	NaN	NaN
Q7V2A1	Uncharacterized protein	Uncharacterized	0.00756125	0.00697597	24.7225	24.6379	0.0846806	0.606782	36	36	36	53.3	53.3	53.3	88.183	0	203.68	14514000000	303	36	36	36	1	33	31	34	32	34	31	33	31	34	32	34	31	33	31	34	32	34	31	754	754	1	356	NaN	NaN	NaN	NaN
Q7V2A2	Plastocyanin	Photosynthesis	0.0917386	0.0883685	26.8282	26.8044	0.0238641	0.948744	29	29	29	65.3	65.3	65.3	38.974	0	323.31	17018000000	257	29	29	29	1	27	28	28	27	28	27	27	28	28	27	28	27	27	28	28	27	28	27	346	346	1	274	NaN	NaN	NaN	NaN
Q7V2A3	Chaperone protein ClpB	Basic Cellular Processes	0.00891755	0.00835683	26.3576	26.2933	0.0642961	0.480127	14	14	14	41	41	41	38.231	0	52.705	889870000	65	14	14	14	1	9	13	8	11	10	10	9	13	8	11	10	10	9	13	8	11	10	10	327	327	1	68	NaN	NaN	NaN	NaN
Q7V2A4	Uncharacterized protein	Uncharacterized	0.00730813	0.00667763	23.5891	23.4885	0.100545	0.511233	1	1	1	20.7	20.7	20.7	12.357	0	22.752	1287400000	27	1	1	1	1	1	1	1	1	1	1	1	1	1	1	1	1	1	1	1	1	1	1	116	116	1	18	NaN	NaN	NaN	NaN
Q7V2A5	Putative type II alternative sigma factor, sigma70 family	Basic Cellular Processes	0.0121597	0.0124366	25.3188	25.3802	-0.0614516	0.59301	42	39	39	56.7	53	53	97.363	0	323.31	6187100000	305	42	39	39	1	34	33	35	33	35	33	31	30	32	30	32	30	31	30	32	30	32	30	860	860	1	313	NaN	NaN	NaN	NaN
Q7V2A6	Uncharacterized protein	Uncharacterized	0.0392232	0.0415277	25.4571	25.8058	-0.348694	0.864588	4	4	4	17.5	17.5	17.5	18.598	0	6.8057	137340000	18	4	4	4	1	3	3	3	3	3	4	3	3	3	3	3	4	3	3	3	3	3	4	154	154	1	19	NaN	NaN	NaN	NaN
Q7V2A7	Conserved hypothetical	Uncharacterized	0.0148235	0.0149499	24.0654	24.1051	-0.0396697	0.945798	14	14	14	48.5	48.5	48.5	34.643	0	28.019	1401000000	72	14	14	14	1	12	11	12	11	12	11	12	11	12	11	12	11	12	11	12	11	12	11	307	307	1	81	NaN	NaN	NaN	NaN
Q7V2A8	Uncharacterized protein	Uncharacterized	0.0710588	0.0728455	26.0967	26.1609	-0.0642198	0.531256	2	2	2	24.2	24.2	24.2	14.169	0	10.504	533720000	22	2	2	2	1	2	2	2	2	2	2	2	2	2	2	2	2	2	2	2	2	2	2	124	124	1	22	NaN	NaN	NaN	NaN
Q7V2A9	Uncharacterized protein	Uncharacterized	0.0740153	0.0754791	26.1675	26.227	-0.0594425	0.779473	4	4	4	33	33	33	12.24	0	11.156	251990000	16	4	4	4	1	2	4	3	3	4	4	2	4	3	3	4	4	2	4	3	3	4	4	106	106	1	20	NaN	NaN	NaN	NaN
Q7V2B2	Dihydroorotase	Central Metabolism	0.0177529	0.0145141	26.0466	25.7868	0.259756	0.259969	3	3	3	35.6	35.6	35.6	10.892	0	10.616	1159900000	19	3	3	3	1	3	3	3	3	3	3	3	3	3	3	3	3	3	3	3	3	3	3	90	90	1	23	NaN	NaN	NaN	NaN
Q7V2B4	Probable glutathione reductase (NADPH)	Oxidative Stress	0.0138424	0.0138729	26.0875	26.1185	-0.0310084	0.519809	2	2	2	25.3	25.3	25.3	9.9534	0	7.2782	986070000	11	2	2	2	1	2	2	2	2	2	2	2	2	2	2	2	2	2	2	2	2	2	2	91	91	1	18	NaN	NaN	NaN	NaN
Q7V2B5	Uncharacterized protein	Uncharacterized	0.00352702	0.00405836	23.9515	24.1841	-0.232567	0.498637	11	11	11	39.5	39.5	39.5	39.957	0	47.722	1168700000	43	11	11	11	1	8	10	8	8	9	8	8	10	8	8	9	8	8	10	8	8	9	8	349	349	1	56	NaN	NaN	NaN	NaN
Q7V2B9	Putative multidrug efflux ABC transporter	Membrane Transport	0.00886704	0.00791358	25.8257	25.6889	0.136774	0.416323	28	28	28	59	59	59	50.618	0	120.69	3625200000	117	28	28	28	1	25	23	26	25	22	24	25	23	26	25	22	24	25	23	26	25	22	24	459	459	1	174	NaN	NaN	NaN	NaN
Q7V2C0	ATP phosphoribosyltransferase	Central Metabolism	0.0698425	0.0711767	27.3255	27.3821	-0.0566413	0.821308	9	9	9	24.8	24.8	24.8	48.323	0	44.168	319700000	38	9	9	9	1	6	7	7	8	8	8	6	7	7	8	8	8	6	7	7	8	8	8	412	412	1	44	NaN	NaN	NaN	NaN
Q7V2C2	Uncharacterized protein	Uncharacterized	0.0677365	0.0694036	26.5586	26.6212	-0.0626195	0.401195	17	17	17	40	40	40	67.447	0	78.509	2262600000	92	17	17	17	1	13	13	13	14	15	13	13	13	13	14	15	13	13	13	13	14	15	13	598	598	1	104	NaN	NaN	NaN	NaN
Q7V2C4	4a-hydroxytetrahydrobiopterin dehydratase	Central Metabolism	0.0307205	0.0268171	24.4749	24.4878	-0.0128498	1	13	13	13	42.8	42.8	42.8	23.27	0	50.01	4289600000	86	13	13	13	1	12	12	12	13	13	11	12	12	12	13	13	11	12	12	12	13	13	11	215	215	1	95	NaN	NaN	NaN	NaN
Q7V2C5	Putative carboxysome peptide B	Carbon Fixation	0.0689686	0.0746937	25.7506	25.8917	-0.141087	0.50202	6	6	6	64.6	64.6	64.6	13.995	0	35.135	2327700000	44	6	6	6	1	5	5	5	5	6	5	5	5	5	5	6	5	5	5	5	5	6	5	130	130	1	49	NaN	NaN	NaN	NaN
Q7V2C6	Putative carboxysome peptide A	Carbon Fixation	0.0912076	0.0782366	26.4192	26.2236	0.195608	0.56928	2	2	2	21.5	21.5	21.5	9.5778	0.0015361	2.9258	276620000	10	2	2	2	1	2	2	2	2	2	1	2	2	2	2	2	1	2	2	2	2	2	1	79	79	1	12	NaN	NaN	NaN	NaN
Q7V2C7	Carboxysome shell protein CsoS3	Carbon Fixation	0.0518916	0.0503533	28.1406	28.1248	0.0158189	0.967817	3	3	3	46.6	46.6	46.6	7.8749	0	6.5451	694160000	9	3	3	3	1	2	2	2	3	3	3	2	2	2	3	3	3	2	2	2	3	3	3	73	73	1	15	NaN	NaN	NaN	NaN
Q7V2C8	Carboxysome shell protein CsoS2	Carbon Fixation	0.0774861	0.0842268	29.3085	29.4578	-0.149366	0.289647	5	5	5	61.4	61.4	61.4	9.3957	0	27.634	1927900000	31	5	5	5	1	5	5	5	5	4	3	5	5	5	5	4	3	5	5	5	5	4	3	88	88	1	34	NaN	NaN	NaN	NaN
Q7V2C9	Ribulose bisphosphate carboxylase, small chain	Carbon Fixation	0.566493	0.52611	29.4128	29.3375	0.0752684	0.867196	29	29	29	63.3	63.3	63.3	57.305	0	323.31	10218000000	274	29	29	29	1	28	26	28	26	27	27	28	26	28	26	27	27	28	26	28	26	27	27	509	509	1	303	NaN	NaN	NaN	NaN
Q7V2D0	Ribulose bisphosphate carboxylase large chain	Carbon Fixation	0.721901	0.742313	31.8268	31.8962	-0.0694052	0.785065	61	61	61	70.1	70.1	70.1	81.881	0	323.31	83999000000	824	61	61	61	1	56	57	56	57	58	59	56	57	56	57	58	59	56	57	56	57	58	59	765	765	1	822	NaN	NaN	NaN	NaN
Q7V2D1	Carbon dioxide-concentrating mechanism protein CcmK	Carbon Fixation	2.31899	2.16237	31.3172	31.2463	0.0708586	0.779836	4	4	4	37.2	37.2	37.2	12.939	0	67.977	14906000000	223	4	4	4	1	4	4	4	4	4	4	4	4	4	4	4	4	4	4	4	4	4	4	113	113	1	205	NaN	NaN	NaN	NaN
Q7V2D2	HAM1 family protein	Central Metabolism	0.02942	0.0275361	25.9404	25.8664	0.0740045	0.783932	43	43	43	69.9	69.9	69.9	52.573	0	323.31	254760000000	1123	43	43	43	1	42	41	42	41	41	41	42	41	42	41	41	41	42	41	42	41	41	41	471	471	1	1116	NaN	NaN	NaN	NaN
Q7V2D3	Uncharacterized protein	Uncharacterized	0.0151158	0.016194	25.3709	25.4998	-0.128916	0.257364	11	11	11	91.3	91.3	91.3	10.572	0	177.64	92585000000	507	11	11	11	1	9	11	10	10	10	10	9	11	10	10	10	10	9	11	10	10	10	10	103	103	1	475	NaN	NaN	NaN	NaN
Q7V2D4	Conserved hypothetical	Uncharacterized	0.0571121	0.0663451	26.2166	26.4639	-0.24733	0.35499	10	10	10	59	59	59	21.745	0	99.871	1914200000	83	10	10	10	1	9	10	10	10	10	10	9	10	10	10	10	10	9	10	10	10	10	10	195	195	1	96	NaN	NaN	NaN	NaN
Q7V2D5	Light-independent protochlorophyllide reductase subunit N	Central Metabolism	0.0114257	0.00908353	25.6341	25.3625	0.271602	0.664836	11	11	11	53.9	53.9	53.9	27.51	0	73.519	1667000000	63	11	11	11	1	9	10	10	10	11	11	9	10	10	10	11	11	9	10	10	10	11	11	256	256	1	77	NaN	NaN	NaN	NaN
Q7V2D6	Light-independent protochlorophyllide reductase subunit B	Central Metabolism	0.00468259	0.00487759	24.7204	24.8064	-0.0859687	0.358471	8	8	8	77	77	77	13.318	0	58.264	2306400000	57	8	8	8	1	6	5	7	7	7	8	6	5	7	7	7	8	6	5	7	7	7	8	122	122	1	64	NaN	NaN	NaN	NaN
Q7V2D7	Light-independent protochlorophyllide reductase iron-sulfur ATP-binding protein	Central Metabolism	0.0165631	0.0154799	25.7037	25.6379	0.0658258	0.756371	8	8	8	32.3	32.3	32.3	46.285	0	34.612	800310000	26	8	8	8	1	8	5	5	5	5	5	8	5	5	5	5	5	8	5	5	5	5	5	418	418	1	34	NaN	NaN	NaN	NaN
Q7V2D8	Light dependent protochlorophyllide oxido-reductase	Central Metabolism	0.0466828	0.0430908	27.3804	27.2953	0.0850875	0.457865	13	13	13	31.2	31.2	31.2	59.103	0	65.776	731080000	38	13	13	13	1	9	10	11	8	9	10	9	10	11	8	9	10	9	10	11	8	9	10	526	526	1	59	NaN	NaN	NaN	NaN
Q7V2E1	Biotin/lipoate A/B protein ligase family	Central Metabolism	0.00495281	0.0052897	23.5629	23.685	-0.122166	0.434452	11	11	11	34.9	34.9	34.9	32.249	0	113.11	1456300000	78	11	11	11	1	11	10	10	11	9	9	11	10	10	11	9	9	11	10	10	11	9	9	295	295	1	86	NaN	NaN	NaN	NaN
Q7V2E2	Uncharacterized protein	Uncharacterized	0.00845578	0.00793784	25.2052	25.1348	0.0703786	0.842697	13	13	13	45.8	45.8	45.8	37.518	0	92.663	4444700000	95	13	13	13	1	11	11	12	12	10	12	11	11	12	12	10	12	11	11	12	12	10	12	334	334	1	103	NaN	NaN	NaN	NaN
Q7V2E3	N-(5-phosphoribosyl)anthranilate isomerase	Central Metabolism	0.00337035	0.00409104	22.9871	23.2891	-0.302025	0.297239	8	8	8	35	35	35	25.947	0	15.493	200340000	24	8	8	8	1	5	5	7	5	5	4	5	5	7	5	5	4	5	5	7	5	5	4	223	223	1	31	NaN	NaN	NaN	NaN
Q7V2E4	Putative GTP cyclohydrolase I	Central Metabolism	0.043286	0.0500788	26.8135	27.0693	-0.255866	0.562236	10	10	10	25	25	25	46.874	0	97.818	1287700000	63	10	10	10	1	9	10	8	7	9	10	9	10	8	7	9	10	9	10	8	7	9	10	408	408	1	68	NaN	NaN	NaN	NaN
Q7V2E5	Putative short-chain dehydrogenase	Central Metabolism	0.0570047	0.0548663	27.163	27.1352	0.0277926	0.855928	4	4	4	17.7	17.7	17.7	24.886	0.00078678	3.7621	128440000	9	4	4	4	1	2	3	3	2	4	3	2	3	3	2	4	3	2	3	3	2	4	3	220	220	1	17	NaN	NaN	NaN	NaN
Q7V2E6	Acetyl-coenzyme A carboxylase carboxyl transferase subunit alpha	Central Metabolism	0.0978624	0.0941218	28.4518	28.4262	0.0255318	0.892058	9	9	9	42.3	42.3	42.3	28.066	0	85.321	2843900000	112	9	9	9	1	9	9	9	9	9	9	9	9	9	9	9	9	9	9	9	9	9	9	246	246	1	116	NaN	NaN	NaN	NaN
Q7V2E7	Uncharacterized protein	Uncharacterized	0.0178664	0.017016	26.0468	26.0047	0.0421346	0.842355	7	7	7	34	34	34	25.689	0	84.119	2835900000	69	7	7	7	1	6	6	6	6	6	5	6	6	6	6	6	5	6	6	6	6	6	5	235	235	1	81	NaN	NaN	NaN	NaN
Q7V2E8	Aldehyde decarbonylase	Central Metabolism	0.0274467	0.0249542	26.1201	26.0173	0.102825	0.671811	12	12	12	53.1	53.1	53.1	37.243	0	222.99	9837100000	100	12	12	12	1	11	12	12	11	12	12	11	12	12	11	12	12	11	12	12	11	12	12	335	335	1	112	NaN	NaN	NaN	NaN
Q7V2E9	Creatininase	Central Metabolism	0.0660575	0.0695466	27.5497	27.6508	-0.101081	0.417387	22	22	22	54	54	54	38.361	0	96.413	2018900000	119	22	22	22	1	13	17	17	16	15	18	13	17	17	16	15	18	13	17	17	16	15	18	346	346	1	131	NaN	NaN	NaN	NaN
Q7V2F0	30S ribosomal protein S1 homolog B, putative Nbp1	Basic Cellular Processes	0.136815	0.131219	29.2119	29.1791	0.0328191	0.814341	6	6	6	35.3	35.3	35.3	26.962	0	31.772	781020000	33	6	6	6	1	4	4	5	4	5	4	4	4	5	4	5	4	4	4	5	4	5	4	238	238	1	26	NaN	NaN	NaN	NaN
Q7V2F1	Uncharacterized protein	Uncharacterized	0.0177053	0.0184689	25.8316	25.9222	-0.0906455	0.474663	15	15	15	52.8	52.8	52.8	29.453	0	107.87	4995300000	114	15	15	15	1	15	15	14	15	14	14	15	15	14	15	14	14	15	15	14	15	14	14	265	265	1	125	NaN	NaN	NaN	NaN
Q7V2F2	Polyphenol oxidase	Central Metabolism	0.00467705	0.00642404	23.4922	24.1833	-0.691066	0.633701	32	32	32	68.9	68.9	68.9	45.119	0	323.31	18954000000	301	32	32	32	1	28	28	31	28	30	30	28	28	31	28	30	30	28	28	31	28	30	30	405	405	1	293	NaN	NaN	NaN	NaN
Q7V2F4	Acetolactate synthase	Central Metabolism	0.0730953	0.0648059	28.8427	28.6975	0.145275	0.196182	19	19	19	67.8	67.8	67.8	34.768	0	105.19	2795600000	120	19	19	19	1	16	16	15	15	15	17	16	16	15	15	15	17	16	16	15	15	15	17	301	301	1	113	NaN	NaN	NaN	NaN
Q7V2F5	Ferrochelatase	Central Metabolism	0.110633	0.111796	28.849	28.8976	-0.048521	0.894226	3	3	3	13.5	13.5	13.5	30.107	0	5.1917	266860000	8	3	3	3	1	3	3	3	3	3	3	3	3	3	3	3	3	3	3	3	3	3	3	260	260	1	22	NaN	NaN	NaN	NaN
Q7V2F7	Possible cob(I)alamin adenosyltransferase	Central Metabolism	0.0306219	0.0349762	26.2406	26.4546	-0.213955	0.4159	40	40	40	57.4	57.4	57.4	64.303	0	323.31	28225000000	407	40	40	40	1	36	38	38	39	36	39	36	38	38	39	36	39	36	38	38	39	36	39	587	587	1	429	NaN	NaN	NaN	NaN
Q7V2F8	Uridylate kinase	Energy Production and Conversion	0.137886	0.140968	28.4313	28.4917	-0.0604903	0.447003	20	20	20	59.6	59.6	59.6	44.194	0	180.95	17702000000	208	20	20	20	1	19	19	20	19	20	20	19	19	20	19	20	20	19	19	20	19	20	20	391	391	1	213	NaN	NaN	NaN	NaN
Q7V2F9	Ribosome-recycling factor	Basic Cellular Processes	0.0919529	0.101843	27.4849	27.6604	-0.175563	0.1575	7	7	7	33.8	33.8	33.8	25.967	0	14.367	1262600000	37	7	7	7	1	7	6	6	5	5	6	7	6	6	5	5	6	7	6	6	5	5	6	231	231	1	48	NaN	NaN	NaN	NaN
Q7V2G0	NAD binding site	Other	0.00253458	0.00248184	23.3512	23.3476	0.003582	1	13	13	13	67.5	67.5	67.5	25.356	0	168.5	9104000000	173	13	13	13	1	12	12	12	12	13	13	12	12	12	12	13	13	12	12	12	12	13	13	234	234	1	175	NaN	NaN	NaN	NaN
Q7V2G1	Transaldolase	Central Metabolism	0.123482	0.112766	28.7774	28.6787	0.098676	0.530964	13	13	13	76.9	76.9	76.9	20.609	0	184.58	8431900000	117	13	13	13	1	13	12	13	13	13	13	13	12	13	13	13	13	13	12	13	13	13	13	182	182	1	126	NaN	NaN	NaN	NaN
Q7V2G4	Possible membrane associated protease	Basic Cellular Processes	0.0229541	0.02161	26.7944	26.7242	0.0701974	0.880883	10	10	10	27.1	27.1	27.1	42.452	0	9.5676	296710000	25	10	10	10	1	8	5	6	8	7	7	8	5	6	8	7	7	8	5	6	8	7	7	377	377	1	42	NaN	NaN	NaN	NaN
Q7V2G5	Possible alpha-ribazole-5-P phosphatase	Central Metabolism	0.0278114	0.024085	27.0397	26.8593	0.180435	0.164	36	36	36	80.8	80.8	80.8	37.181	0	323.31	31682000000	363	36	36	36	1	33	34	35	35	34	34	33	34	35	35	34	34	33	34	35	35	34	34	333	333	1	360	NaN	NaN	NaN	NaN
Q7V2G6	Putative dihydroorotase	Central Metabolism	0.0292851	0.0266445	27.026	26.921	0.105059	0.533002	13	13	13	34.7	34.7	34.7	51.836	0	65.535	2237800000	85	13	13	13	1	13	11	11	12	11	8	13	11	11	12	11	8	13	11	11	12	11	8	452	452	1	87	NaN	NaN	NaN	NaN
Q7V2G7	Signal peptidase I	Membrane Transport	0.00270547	0.00320298	22.7128	22.9669	-0.254114	0.633491	27	27	27	60.9	60.9	60.9	50.311	0	283.63	8690000000	184	27	27	27	1	25	25	22	23	24	23	25	25	22	23	24	23	25	25	22	23	24	23	442	442	1	203	NaN	NaN	NaN	NaN
Q7V2G8	Putative arsenate reductase	Oxidative Stress	0.00890271	0.010648	23.5156	23.8161	-0.300439	0.534035	23	23	23	59.2	59.2	59.2	47.109	0	99.658	5252500000	150	23	23	23	1	21	23	20	20	21	21	21	23	20	20	21	21	21	23	20	20	21	21	417	417	1	168	NaN	NaN	NaN	NaN
Q7V2G9	Inorganic pyrophosphatase	Inorganic Nutrient Processing	0.0344552	0.0321501	26.0687	25.9931	0.0755997	0.742812	5	5	5	26.8	26.8	26.8	26.137	0	5.8695	122980000	17	5	5	5	1	2	4	3	3	4	4	2	4	3	3	4	4	2	4	3	3	4	4	228	228	1	21	NaN	NaN	NaN	NaN
Q7V2H0	Proline--tRNA ligase	Basic Cellular Processes	0.0483781	0.0445677	28.2787	28.1888	0.0899448	0.264992	3	3	3	32	32	32	14.276	0	9.7469	134380000	14	3	3	3	1	0	3	1	3	2	2	0	3	1	3	2	2	0	3	1	3	2	2	122	122	1	13	NaN	NaN	NaN	NaN
Q7V2H1	Adenylosuccinate synthetase	Central Metabolism	0.14818	0.132975	29.4335	29.3056	0.127932	0.1264	9	9	9	55.5	55.5	55.5	20.346	0	45.811	1199300000	37	9	9	9	1	8	8	8	9	9	8	8	8	8	9	9	8	8	8	8	9	9	8	182	182	1	63	NaN	NaN	NaN	NaN
Q7V2H2	Possible carbohydrate kinase	Central Metabolism	0.0108399	0.0106023	25.2897	25.2892	0.000445048	1	43	43	43	74.7	74.7	74.7	68.207	0	323.31	15590000000	308	43	43	43	1	38	36	39	38	36	39	38	36	39	38	36	39	38	36	39	38	36	39	600	600	1	337	NaN	NaN	NaN	NaN
Q7V2H4	Possible precorrin-6X reductase	Central Metabolism	0.00327743	0.00387004	23.2383	23.5019	-0.263545	0.287463	33	33	33	62.8	62.8	62.8	47.867	0	323.31	27494000000	340	33	33	33	1	30	31	32	31	33	32	30	31	32	31	33	32	30	31	32	31	33	32	436	436	1	361	NaN	NaN	NaN	NaN
Q7V2H5	Uncharacterized protein	Uncharacterized	0.0687875	0.0733215	26.7747	26.8971	-0.122447	0.41442	14	14	14	39.3	39.3	39.3	37.406	0	60.176	1282900000	70	14	14	14	1	9	10	11	10	8	10	9	10	11	10	8	10	9	10	11	10	8	10	338	338	1	74	NaN	NaN	NaN	NaN
Q7V2H7	Uncharacterized protein	Uncharacterized	0.0415068	0.0413337	26.2857	26.3109	-0.0252247	0.940199	5	5	5	14.9	14.9	14.9	30.729	0	4.097	135060000	15	5	5	5	1	4	4	5	5	4	3	4	4	5	5	4	3	4	4	5	5	4	3	269	269	1	25	NaN	NaN	NaN	NaN
Q7V2H8	Uncharacterized protein	Uncharacterized	0.00295061	0.00290689	23.5334	23.5453	-0.0119197	0.971314	13	13	13	81.2	81.2	81.2	16.751	0	89.777	4243400000	102	13	13	13	1	12	12	13	13	13	13	12	12	13	13	13	13	12	12	13	13	13	13	149	149	1	125	NaN	NaN	NaN	NaN
Q7V2H9	Primosomal protein N	Basic Cellular Processes	0.00265193	0.00265674	24.4263	24.4545	-0.028258	0.925205	9	9	9	50	50	50	20.596	0	76.598	2304100000	74	9	9	9	1	6	5	7	7	7	8	6	5	7	7	7	8	6	5	7	7	7	8	176	176	1	72	NaN	NaN	NaN	NaN
Q7V2I0	RNA polymerase sigma factor SigA	Basic Cellular Processes	0.03806	0.0390136	27.3329	27.3967	-0.0637538	0.730793	5	5	5	21.5	21.5	21.5	42.786	0	18.697	206560000	23	5	5	5	1	4	3	4	3	5	3	4	3	4	3	5	3	4	3	4	3	5	3	368	368	1	28	NaN	NaN	NaN	NaN
Q7V2I1	Porphobilinogen deaminase	Central Metabolism	0.0586142	0.0557154	27.6294	27.5857	0.0436586	0.725321	11	11	11	17.4	17.4	17.4	87.032	0	32.498	478890000	35	11	11	11	1	7	10	11	7	8	8	7	10	11	7	8	8	7	10	11	7	8	8	758	758	1	52	NaN	NaN	NaN	NaN
Q7V2I2	Putative inorganic pyrophosphatase	Inorganic Nutrient Processing	0.196746	0.196143	28.6818	28.7053	-0.02351	0.727138	25	25	25	61.6	61.6	61.6	45.751	0	223.44	6730600000	202	25	25	25	1	20	21	22	20	21	23	20	21	22	20	21	23	20	21	22	20	21	23	396	396	1	222	NaN	NaN	NaN	NaN
Q7V2I3	Carboxypeptidase 1	Basic Cellular Processes	0.0138194	0.0131123	26.2053	26.1639	0.0413723	0.888809	32	32	32	71.5	71.5	71.5	34.949	0	290.17	14565000000	345	32	32	32	1	27	29	27	30	29	31	27	29	27	30	29	31	27	29	27	30	29	31	316	316	1	347	NaN	NaN	NaN	NaN
Q7V2I4	Uncharacterized protein	Uncharacterized	0.0186578	0.0208095	25.0065	25.1889	-0.18247	0.368398	14	14	14	89.2	89.2	89.2	22.147	0	260.33	11284000000	151	14	14	14	1	13	14	14	14	14	13	13	14	14	14	14	13	13	14	14	14	14	13	195	195	1	154	NaN	NaN	NaN	NaN
Q7V2I5	Putative pterin-4-alpha-carbinolamine dehydratase	Central Metabolism	0.190684	0.159366	27.6119	27.3723	0.239634	0.490956	21	21	21	46.3	46.3	46.3	57.917	0	113.17	4857000000	131	21	21	21	1	17	19	18	18	20	19	17	19	18	18	20	19	17	19	18	18	20	19	501	501	1	152	NaN	NaN	NaN	NaN
Q7V2I6	Uncharacterized protein	Uncharacterized	0.0403718	0.0425383	27.2858	27.399	-0.113166	0.799848	5	5	5	41	41	41	18.545	0	28.919	707020000	18	5	5	5	1	5	4	5	5	5	4	5	4	5	5	5	4	5	4	5	5	5	4	161	161	1	36	NaN	NaN	NaN	NaN
Q7V2I7	Putative iron ABC transporter	Membrane Transport	0.00278159	0.0026536	23.9793	23.9424	0.0369434	0.843771	4	4	4	69.8	69.8	69.8	11.246	0	42.037	3200600000	59	4	4	4	1	4	4	4	4	4	4	4	4	4	4	4	4	4	4	4	4	4	4	96	96	1	56	NaN	NaN	NaN	NaN
Q7V2I8	Uncharacterized protein	Uncharacterized	0.00400378	0.00325003	23.7471	23.4724	0.274744	0.337612	14	14	14	44.2	44.2	44.2	41.331	0	90.867	3691900000	95	14	14	14	1	12	11	11	10	11	12	12	11	11	10	11	12	12	11	11	10	11	12	364	364	1	104	NaN	NaN	NaN	NaN
Q7V2I9	Uncharacterized protein	Uncharacterized	0.0180453	0.018787	26.2936	26.3828	-0.0892175	0.478381	5	5	5	9.6	9.6	9.6	58.686	0	10.393	372990000	16	5	5	5	1	4	5	5	4	3	4	4	5	5	4	3	4	4	5	5	4	3	4	531	531	1	26	NaN	NaN	NaN	NaN
Q7V2J0	Uncharacterized protein	Uncharacterized	0.0354784	0.0354725	26.2391	26.2664	-0.027345	0.874571	3	3	3	9.2	9.2	9.2	36.973	0.004491	2.155	162830000	8	3	3	3	1	3	2	3	2	2	1	3	2	3	2	2	1	3	2	3	2	2	1	314	314	1	13	NaN	NaN	NaN	NaN
Q7V2J2	Exodeoxyribonuclease III	Basic Cellular Processes	0.0213756	0.020823	26.0046	25.9969	0.00769297	0.968098	20	20	20	50.4	50.4	50.4	46.74	0	131.7	2621300000	115	20	20	20	1	15	17	19	14	17	16	15	17	19	14	17	16	15	17	19	14	17	16	407	407	1	129	NaN	NaN	NaN	NaN
Q7V2J3	Glutamate-1-semialdehyde 2,1-aminomutase	Central Metabolism	0.123376	0.115906	29.1586	29.0974	0.0611814	0.300637	8	8	8	40.2	40.2	40.2	23.209	0	24.446	2432500000	48	8	8	8	1	8	6	7	7	8	7	8	6	7	7	8	7	8	6	7	7	8	7	199	199	1	61	NaN	NaN	NaN	NaN
Q7V2J4	Band 7 protein	Other	2.1728	2.37898	32.605	32.7646	-0.159599	0.112923	12	12	12	49.5	49.5	49.5	32.521	0	42.586	2217600000	69	12	12	12	1	12	11	12	11	11	12	12	11	12	11	11	12	12	11	12	11	11	12	281	281	1	92	NaN	NaN	NaN	NaN
Q7V2J5	UPF0234 protein PMM0481	Other	0.224667	0.245681	28.6302	28.7892	-0.158912	0.354597	28	28	28	81.5	81.5	81.5	46.264	0	323.31	36382000000	403	28	28	28	1	25	25	25	26	26	26	25	25	25	26	26	26	25	25	25	26	26	26	433	433	1	383	NaN	NaN	NaN	NaN
Q7V2J6	Uncharacterized protein	Uncharacterized	0.142267	0.137911	28.011	27.9983	0.0127277	0.978347	21	21	21	72.8	72.8	72.8	29.085	0	323.31	192570000000	623	21	21	21	1	19	20	20	21	20	21	19	20	20	21	20	21	19	20	20	21	20	21	268	268	1	544	NaN	NaN	NaN	NaN
Q7V2J7	Uncharacterized protein	Uncharacterized	0.016936	0.016138	26.0536	26.021	0.0326341	0.951408	16	16	16	64.2	64.2	64.2	19.022	0	80.146	7572800000	82	16	16	16	1	13	11	12	12	11	14	13	11	12	12	11	14	13	11	12	12	11	14	165	165	1	93	NaN	NaN	NaN	NaN
Q7V2J8	Uncharacterized protein	Uncharacterized	0.0218943	0.0218064	25.7897	25.8142	-0.0244751	0.95806	6	6	6	48.2	48.2	48.2	18.669	0	160.73	5851100000	68	6	6	6	1	6	6	6	6	6	6	6	6	6	6	6	6	6	6	6	6	6	6	170	170	1	62	NaN	NaN	NaN	NaN
Q7V2J9	Methionine aminopeptidase	Central Metabolism	0.0795886	0.0767494	27.8919	27.8681	0.0237484	0.824107	16	16	16	59.1	59.1	59.1	40.553	0	92.122	2862800000	86	16	16	16	1	14	14	13	11	12	13	14	14	13	11	12	13	14	14	13	11	12	13	369	369	1	111	NaN	NaN	NaN	NaN
Q7V2K1	50S ribosomal protein L19	Basic Cellular Processes	0.197886	0.200244	28.4037	28.4496	-0.0458889	0.60982	10	10	10	38.4	38.4	38.4	27.193	0	29.043	1178900000	49	10	10	10	1	8	7	8	8	9	7	8	7	8	8	9	7	8	7	8	8	9	7	237	237	1	60	NaN	NaN	NaN	NaN
Q7V2K2	Uncharacterized protein	Uncharacterized	0.110172	0.109188	26.1906	26.2055	-0.0148856	0.959675	23	23	23	80.6	80.6	80.6	30.818	0	203.41	11313000000	225	23	23	23	1	22	22	22	21	22	23	22	22	22	21	22	23	22	22	22	21	22	23	279	279	1	231	NaN	NaN	NaN	NaN
Q7V2K3	Glutamate--tRNA ligase	Basic Cellular Processes	0.0192564	0.0171245	26.6217	26.4811	0.140549	0.212211	14	14	14	67.5	67.5	67.5	18.513	0	72.836	7974400000	120	14	14	14	1	12	12	12	13	12	13	12	12	12	13	12	13	12	12	12	13	12	13	160	160	1	134	NaN	NaN	NaN	NaN
Q7V2K4	Putative Na+/H+ antiporter, CPA1 family	Membrane Transport	0.00657828	0.00659247	24.8118	24.8351	-0.023283	0.951193	4	4	4	74.2	74.2	74.2	6.8158	0	22.054	1111800000	26	4	4	4	1	3	3	3	4	3	4	3	3	3	4	3	4	3	3	3	4	3	4	62	62	1	27	NaN	NaN	NaN	NaN
Q7V2K6	tRNA N6-adenosine threonylcarbamoyltransferase	Basic Cellular Processes	0.00894888	0.00887648	25.0908	25.108	-0.0171146	0.843062	23	23	23	42.3	42.3	42.3	55.383	0	186.25	4461900000	134	23	23	23	1	21	20	20	20	19	19	21	20	20	20	19	19	21	20	20	20	19	19	478	478	1	158	NaN	NaN	NaN	NaN
Q7V2K7	Photosystem I PsaF protein (Subunit III)	Photosynthesis	0.164816	0.172268	28.3421	28.433	-0.0909526	0.48327	5	5	5	12.5	12.5	12.5	42.334	0	55.267	433910000	23	5	5	5	1	4	5	4	4	3	4	4	5	4	4	3	4	4	5	4	4	3	4	399	399	1	24	NaN	NaN	NaN	NaN
Q7V2K9	Guanylate kinase	Energy Production and Conversion	0.0401206	0.0442639	26.3035	26.4738	-0.170291	0.228986	9	9	9	28.9	28.9	28.9	38.732	0	100.29	810700000	41	9	9	9	1	7	7	7	5	8	5	7	7	7	5	8	5	7	7	7	5	8	5	356	356	1	53	NaN	NaN	NaN	NaN
Q7V2L0	Possible secreted protein MPB70	Other	0.00405326	0.0038636	24.6169	24.5725	0.0444075	0.872433	9	9	9	45.7	45.7	45.7	20.153	0	84.292	9690400000	96	9	9	9	1	8	9	9	8	9	9	8	9	9	8	9	9	8	9	9	8	9	9	184	184	1	81	NaN	NaN	NaN	NaN
Q7V2L3	Uncharacterized protein	Uncharacterized	0.0262215	0.0313417	24.8606	25.1665	-0.305936	0.494209	11	11	11	59.2	59.2	59.2	21.228	0	168.15	3722300000	83	11	11	11	1	9	9	10	10	10	11	9	9	10	10	10	11	9	9	10	10	10	11	184	184	1	95	NaN	NaN	NaN	NaN
Q7V2L4	Cytochrome b6-f complex iron-sulfur subunit	Photosynthesis	0.0173412	0.0200288	25.0437	25.2796	-0.235963	0.367796	13	13	13	27.9	27.9	27.9	65.608	0	46.864	529490000	42	13	13	13	1	6	8	10	8	9	7	6	8	10	8	9	7	6	8	10	8	9	7	566	566	1	51	NaN	NaN	NaN	NaN
Q7V2L5	Cytochrome f	Photosynthesis	0.0185023	0.0174847	25.9696	25.9172	0.0524089	0.779894	2	2	2	21	21	21	12.798	0	6.9343	511520000	23	2	2	2	1	1	2	2	2	2	2	1	2	2	2	2	2	1	2	2	2	2	2	105	105	1	22	NaN	NaN	NaN	NaN
Q7V2L7	Uncharacterized protein	Uncharacterized	0.0797062	0.0683199	27.1176	26.9239	0.193696	0.331809	5	5	5	35.4	35.4	35.4	18.912	0	61.659	709410000	22	5	5	5	1	3	4	5	3	4	3	3	4	5	3	4	3	3	4	5	3	4	3	178	178	1	29	NaN	NaN	NaN	NaN
Q7V2L8	Putative exopolyphosphatase	Inorganic Nutrient Processing	0.0201812	0.0185051	26.8417	26.7463	0.0953617	0.535965	10	10	10	37.5	37.5	37.5	34.656	0	41.994	2420200000	66	10	10	10	1	9	9	8	8	7	10	9	9	8	8	7	10	9	9	8	8	7	10	317	317	1	77	NaN	NaN	NaN	NaN
Q7V2M0	Uncharacterized protein	Uncharacterized	0.00685631	0.00768423	24.3843	24.5125	-0.128219	0.924355	6	6	6	37.4	37.4	37.4	18.644	0	200.48	2186000000	44	6	6	6	1	5	5	5	6	5	6	5	5	5	6	5	6	5	5	5	6	5	6	163	163	1	63	NaN	NaN	NaN	NaN
Q7V2M1	2-C-methyl-D-erythritol 4-phosphate cytidylyltransferase	Central Metabolism	0.0168264	0.0190921	25.3243	25.5345	-0.210287	0.433633	24	24	24	51.1	51.1	51.1	60.411	0	148.82	6660100000	178	24	24	24	1	22	21	22	21	23	22	22	21	22	21	23	22	22	21	22	21	23	22	532	532	1	188	NaN	NaN	NaN	NaN
Q7V2M2	3-oxoacyl-[acyl-carrier protein] reductase	Central Metabolism	0.112933	0.117894	28.2317	28.3237	-0.0920092	0.4159	5	5	5	20	20	20	32.528	0	11.425	254060000	16	5	5	5	1	3	3	4	2	3	3	3	3	4	2	3	3	3	3	4	2	3	3	290	290	1	19	NaN	NaN	NaN	NaN
Q7V2M3	60 kDa chaperonin 1	Basic Cellular Processes	1.24047	1.27626	32.9133	32.9822	-0.0689189	0.223566	10	10	10	56.5	56.5	56.5	24.917	0	25.337	1281200000	42	10	10	10	1	7	7	9	7	7	7	7	7	9	7	7	7	7	7	9	7	7	7	223	223	1	50	NaN	NaN	NaN	NaN
Q7V2M5	Transport permease protein	Membrane Transport	0.00570433	0.00445251	23.8923	23.4151	0.477156	0.847449	16	16	16	64.7	64.7	64.7	26.469	0	222.9	13135000000	157	16	16	16	1	16	16	16	15	16	16	16	16	16	15	16	16	16	16	16	15	16	16	249	249	1	189	NaN	NaN	NaN	NaN
Q7V2M6	Putative multidrug efflux ABC transporter	Membrane Transport	0.0508478	0.0423023	27.5206	27.2858	0.234774	0.2176	53	52	52	79.2	79.2	79.2	61.44	0	323.31	295870000000	1157	53	52	52	1	51	52	50	50	52	53	50	51	49	49	51	52	50	51	49	49	51	52	581	581	1	1083	NaN	NaN	NaN	NaN
Q7V2N2	Uncharacterized protein	Uncharacterized	0.00927328	0.0103392	23.4979	23.7217	-0.22377	0.754868	2	2	2	5.8	5.8	5.8	30.471	0.00077519	3.1899	201650000	10	2	2	2	1	2	2	2	1	2	2	2	2	2	1	2	2	2	2	2	1	2	2	274	274	1	11	NaN	NaN	NaN	NaN
Q7V2N4	Uncharacterized protein	Uncharacterized	0.0144593	0.0139944	25.673	25.6534	0.0195955	0.926986	19	19	19	63.3	63.3	63.3	37.919	0	89.511	4008100000	116	19	19	19	1	13	16	16	13	14	15	13	16	16	13	14	15	13	16	16	13	14	15	338	338	1	127	NaN	NaN	NaN	NaN
Q7V2N6	Uncharacterized protein	Uncharacterized	0.00684279	0.00795037	23.7928	24.0688	-0.276	0.66165	3	3	3	24.8	24.8	24.8	12.849	0	14.553	138970000	8	3	3	3	1	1	2	3	3	2	3	1	2	3	3	2	3	1	2	3	3	2	3	117	117	1	16	NaN	NaN	NaN	NaN
Q7V2N7	DNA topoisomerase 1	Basic Cellular Processes	0.0118586	0.0118162	26.7869	26.8097	-0.0228825	0.819422	17	17	17	55.5	55.5	55.5	38.894	0	36.561	1076000000	69	17	17	17	1	12	11	14	13	12	11	12	11	14	13	12	11	12	11	14	13	12	11	330	330	1	81	NaN	NaN	NaN	NaN
Q7V2N8	NAD(P)H-quinone oxidoreductase subunit 2	Photosynthesis	0.00616315	0.00696318	25.0598	25.2635	-0.203781	0.299519	4	4	4	25.8	25.8	25.8	22.46	0	5.3521	136350000	17	4	4	4	1	1	2	2	3	3	4	1	2	2	3	3	4	1	2	2	3	3	4	194	194	1	17	NaN	NaN	NaN	NaN
Q7V2N9	Possible ABC transporter, ATP binding protein	Membrane Transport	0.0341953	0.0427979	26.3789	26.7277	-0.348792	0.299821	55	55	55	63	63	63	97.829	0	323.31	12603000000	427	55	55	55	1	50	45	51	49	52	52	50	45	51	49	52	52	50	45	51	49	52	52	870	870	1	463	NaN	NaN	NaN	NaN
Q7V2P1	2-phytyl-1,4-naphtoquinone methyltransferase	Central Metabolism	0.00525458	0.00593952	23.71	23.9147	-0.204711	0.380282	5	5	5	9.9	9.9	9.9	54.219	0	12.668	367570000	28	5	5	5	1	4	3	5	4	4	4	4	3	5	4	4	4	4	3	5	4	4	4	506	506	1	33	NaN	NaN	NaN	NaN
Q7V2P2	Imidazole glycerol phosphate synthase subunit HisF	Central Metabolism	0.0604351	0.0579821	27.3643	27.3341	0.0302677	0.772294	7	7	7	48.7	48.7	48.7	25.031	0	58.253	1445300000	45	7	7	7	1	7	5	6	5	4	5	7	5	6	5	4	5	7	5	6	5	4	5	228	228	1	47	NaN	NaN	NaN	NaN
Q7V2P4	Chlorophyll synthase 33 kD subunit	Photosynthesis	0.0604591	0.0633738	27.6682	27.7615	-0.0933056	0.755586	5	5	5	18	18	18	26.873	0	10.934	273450000	13	5	5	5	1	4	5	4	5	5	4	4	5	4	5	5	4	4	5	4	5	5	4	233	233	1	27	NaN	NaN	NaN	NaN
Q7V2P6	Sun protein (Fmu protein)	Other	0.0100453	0.00917308	25.5209	25.4511	0.069809	0.940299	15	15	15	42.7	42.7	42.7	27.306	0	142.46	3764200000	94	15	15	15	1	14	15	15	15	15	15	14	15	15	15	15	15	14	15	15	15	15	15	255	255	1	117	NaN	NaN	NaN	NaN
Q7V2P7	Uncharacterized protein	Uncharacterized	0.00557187	0.00576609	24.8838	24.9589	-0.0750961	0.783456	2	2	2	9.2	9.2	9.2	34.167	0	21.272	1553800000	16	2	2	2	1	2	2	2	2	2	2	2	2	2	2	2	2	2	2	2	2	2	2	315	315	1	12	NaN	NaN	NaN	NaN
Q7V2Q1	Elongation factor 4	Basic Cellular Processes	0.0269262	0.0251147	27.4385	27.3657	0.0728067	0.492168	11	11	11	28.6	28.6	28.6	49.372	0	52.925	704690000	39	11	11	11	1	8	9	9	9	9	9	8	9	9	9	9	9	8	9	9	9	9	9	437	437	1	55	NaN	NaN	NaN	NaN
Q7V2Q2	Probable malate:quinone oxidoreductase	Energy Production and Conversion	0.0148075	0.0141155	26.2991	26.2576	0.0414569	0.720287	13	13	13	27	27	27	58.695	0	74.449	930940000	57	13	13	13	1	13	11	9	11	10	10	13	11	9	11	10	10	13	11	9	11	10	10	496	496	1	74	NaN	NaN	NaN	NaN
Q7V2Q3	NifU-like protein	Photosynthesis	0.0462224	0.0380345	25.3174	25.0701	0.247371	0.439773	27	27	27	55.3	55.3	55.3	67.457	0	226.96	3591400000	168	27	27	27	1	21	22	21	21	21	19	21	22	21	21	21	19	21	22	21	21	21	19	602	602	1	182	NaN	NaN	NaN	NaN
Q7V2Q5	Uncharacterized protein	Uncharacterized	0.114607	0.109022	28.3391	28.2949	0.0442073	0.606654	20	20	20	45.9	45.9	45.9	55.614	0	118.48	2635800000	119	20	20	20	1	18	16	19	16	13	17	18	16	19	16	13	17	18	16	19	16	13	17	497	497	1	128	NaN	NaN	NaN	NaN
Q7V2Q6	Putative L-cysteine/cystine lyase	Central Metabolism	0.00404582	0.00419166	24.0822	24.1457	-0.0634963	0.925488	4	4	4	88.9	88.9	88.9	8.8152	0	23.77	591460000	30	4	4	4	1	3	4	4	3	4	4	3	4	4	3	4	4	3	4	4	3	4	4	81	81	1	31	NaN	NaN	NaN	NaN
Q7V2Q7	Putative short chain dehydrogenase	Central Metabolism	0.0671757	0.0688817	27.394	27.4574	-0.0633551	0.542047	13	13	13	53.8	53.8	53.8	29.481	0	119.54	5010100000	70	13	13	13	1	12	13	13	13	13	12	12	13	13	13	13	12	12	13	13	13	13	12	264	264	1	94	NaN	NaN	NaN	NaN
Q7V2Q8	UDP-N-acetylmuramoyl-L-alanyl-D-glutamate--2,6-diaminopimelate ligase	Central Metabolism	0.00223513	0.00241241	23.6089	23.7487	-0.139726	0.515271	6	6	6	17.3	17.3	17.3	45.265	0	11.596	302520000	21	6	6	6	1	5	5	4	5	4	5	5	5	4	5	4	5	5	5	4	5	4	5	393	393	1	31	NaN	NaN	NaN	NaN
Q7V2R1	30S ribosomal protein S4	Basic Cellular Processes	0.134242	0.140101	28.1805	28.2706	-0.0900701	0.259375	16	16	16	70.9	70.9	70.9	26.254	0	97.657	4783800000	114	16	16	16	1	14	15	15	16	16	15	14	15	15	16	16	15	14	15	15	16	16	15	234	234	1	132	NaN	NaN	NaN	NaN
Q7V2R2	Cysteine synthase	Central Metabolism	0.397855	0.370966	30.4472	30.3739	0.0733077	0.475635	12	12	12	27.6	27.6	27.6	57.651	0	34.186	348440000	36	12	12	12	1	6	8	7	7	8	9	6	8	7	7	8	9	6	8	7	7	8	9	511	511	1	48	NaN	NaN	NaN	NaN
Q7V2R3	S-adenosylmethionine:tRNA ribosyltransferase-isomerase	Central Metabolism	0.00353172	0.00346615	23.8216	23.8208	0.000722885	0.99993	17	17	17	69.3	69.3	69.3	22.856	0	69.855	8182600000	101	17	17	17	1	12	15	14	15	15	17	12	15	14	15	15	17	12	15	14	15	15	17	202	202	1	132	NaN	NaN	NaN	NaN
Q7V2R4	Dihydrolipoamide acetyltransferase component of pyruvate dehydrogenase complex		0.181545	0.17537	29.7881	29.7662	0.0218271	0.819113	20	20	20	82.3	82.3	82.3	34.981	0	323.31	59852000000	536	20	20	20	1	19	18	19	20	20	20	19	18	19	20	20	20	19	18	19	20	20	20	328	328	1	512	NaN	NaN	NaN	NaN
Q7V2R6	Uncharacterized protein	Uncharacterized	0.219375	0.221146	28.4404	28.4804	-0.0399965	0.610583	7	7	7	22.5	22.5	22.5	42.624	0	11.75	229590000	23	7	7	7	1	7	6	7	7	4	4	7	6	7	7	4	4	7	6	7	7	4	4	374	374	1	36	NaN	NaN	NaN	NaN
Q7V2R7	Putative long-chain-fatty-acid--CoA ligase	Central Metabolism	0.00502027	0.0054517	25.097	25.2531	-0.15613	0.610662	36	36	36	74.1	74.1	74.1	49.185	0	323.31	36174000000	489	36	36	36	1	33	33	34	34	35	33	33	33	34	34	35	33	33	33	34	34	35	33	455	455	1	498	NaN	NaN	NaN	NaN
Q7V2R9	Ribosome hibernation promoting factor	Basic Cellular Processes	0.0144656	0.0141507	24.908	24.9035	0.00456238	0.986154	15	15	15	93.9	93.9	93.9	16.628	0	204.08	8940200000	114	15	15	15	1	13	12	13	14	13	12	13	12	13	14	13	12	13	12	13	14	13	12	148	148	1	105	NaN	NaN	NaN	NaN
Q7V2S0	Deoxyribose-phosphate aldolase	Central Metabolism	0.00916808	0.00984046	24.4221	24.5544	-0.132266	0.588986	16	16	16	32.4	32.4	32.4	72.828	0	37.176	1702000000	67	16	16	16	1	12	16	13	13	13	11	12	16	13	13	13	11	12	16	13	13	13	11	641	641	1	87	NaN	NaN	NaN	NaN
Q7V2S1	Pyrroline-5-carboxylate reductase	Central Metabolism	0.0350055	0.0356291	26.648	26.703	-0.0550385	0.725922	17	17	17	63.9	63.9	63.9	22.861	0	146.52	1180100000	83	17	17	17	1	15	12	14	9	12	13	15	12	14	9	12	13	15	12	14	9	12	13	194	194	1	100	NaN	NaN	NaN	NaN
Q7V2S2	Cell division protein SepF	Basic Cellular Processes	0.0368549	0.0379021	26.2337	26.3034	-0.0696576	0.611971	7	7	7	37	37	37	24.502	0	19.163	512860000	34	7	7	7	1	5	6	5	6	6	6	5	6	5	6	6	6	5	6	5	6	6	6	219	219	1	38	NaN	NaN	NaN	NaN
Q7V2S3	Uncharacterized protein	Uncharacterized	0.0102845	0.0109486	24.5445	24.662	-0.117509	0.380393	15	15	15	60.1	60.1	60.1	29.729	0	87.431	4036000000	117	15	15	15	1	14	14	14	15	15	13	14	14	14	15	15	13	14	14	14	15	15	13	268	268	1	118	NaN	NaN	NaN	NaN
Q7V2S4	Uncharacterized protein	Uncharacterized	0.123402	0.131969	26.8577	26.985	-0.127298	0.474005	13	13	13	95.8	95.8	95.8	21.147	0	101.05	3312000000	131	13	13	13	1	10	13	10	10	11	11	10	13	10	10	11	11	10	13	10	10	11	11	191	191	1	115	NaN	NaN	NaN	NaN
Q7V2S5	Possible cobalt transport protein	Membrane Transport	0.0151432	0.0150067	25.6183	25.6368	-0.0184962	0.964695	14	14	14	62.7	62.7	62.7	24.432	0	75.338	802070000	80	14	14	14	1	12	13	12	12	13	12	12	13	12	12	13	12	12	13	12	12	13	12	212	212	1	81	NaN	NaN	NaN	NaN
Q7V2S6	GTPase Der	Basic Cellular Processes	0.00598026	0.00604561	24.8734	24.9168	-0.043403	0.672667	6	6	6	55.7	55.7	55.7	10.551	0	30.055	1911400000	28	6	6	6	1	4	5	6	6	5	5	4	5	6	6	5	5	4	5	6	6	5	5	88	88	1	38	NaN	NaN	NaN	NaN
Q7V2S8	Putative similar to tRNA-(MS[2]IO[6]A)-hydroxylase	Basic Cellular Processes	0.00567602	0.00492147	23.6076	23.4148	0.192773	0.754234	4	4	4	8.2	8.2	8.2	35.155	0.00078493	3.6987	576340000	14	4	4	4	1	3	3	3	3	4	3	3	3	3	3	4	3	3	3	3	3	4	3	304	304	1	25	NaN	NaN	NaN	NaN
Q7V2S9	3-dehydroquinate dehydratase	Central Metabolism	0.013926	0.0147279	24.4407	24.5515	-0.110721	0.609635	15	15	15	44.8	44.8	44.8	51.2	0	48.055	1116900000	69	15	15	15	1	10	10	12	9	12	10	10	10	12	9	12	10	10	10	12	9	12	10	458	458	1	75	NaN	NaN	NaN	NaN
Q7V2T0	Possible uncharacterized DNA methylase	Basic Cellular Processes	0.00614276	0.00531224	23.8115	23.6325	0.179045	0.409442	3	3	3	20.3	20.3	20.3	23.126	0	19.146	118790000	6	3	3	3	1	1	3	2	1	2	0	1	3	2	1	2	0	1	3	2	1	2	0	202	202	1	10	NaN	NaN	NaN	NaN
Q7V2T1	Possible uncharacterized restriction enzyme, interrupted-C	Basic Cellular Processes	0.00903007	0.00839032	26.3238	26.2456	0.0781244	0.466624	5	5	5	39	39	39	16.128	0	28.461	337910000	20	5	5	5	1	2	2	4	5	4	3	2	2	4	5	4	3	2	2	4	5	4	3	146	146	1	28	NaN	NaN	NaN	NaN
Q7V2T4	Uncharacterized protein	Uncharacterized	0.0264904	0.0291155	25.4554	25.6222	-0.16676	0.321341	4	4	4	17.3	17.3	17.3	24.769	0	8.9591	133780000	19	4	4	4	1	3	3	3	2	3	3	3	3	3	2	3	3	3	3	3	2	3	3	214	214	1	19	NaN	NaN	NaN	NaN
Q7V2T5	Uncharacterized protein	Uncharacterized	0.0229397	0.0227687	24.5127	24.5274	-0.0146872	0.950863	41	41	41	55.9	55.9	55.9	95.6	0	268.93	7647400000	283	41	41	41	1	35	37	35	35	35	34	35	37	35	35	35	34	35	37	35	35	35	34	829	829	1	301	NaN	NaN	NaN	NaN
Q7V2T6	Uncharacterized protein	Uncharacterized	0.1458	0.114587	27.122	26.8132	0.30879	0.40921	13	13	13	81.3	81.3	81.3	18.592	0	47.948	2480100000	81	13	13	13	1	10	12	12	13	12	12	10	12	12	13	12	12	10	12	12	13	12	12	155	155	1	126	NaN	NaN	NaN	NaN
Q7V2T7	Uncharacterized protein	Uncharacterized	0.0697801	0.0669453	26.0217	25.9836	0.0381088	0.924243	4	4	4	53.8	53.8	53.8	10.945	0	36.596	674770000	29	4	4	4	1	4	4	3	4	4	4	4	4	3	4	4	4	4	4	3	4	4	4	93	93	1	36	NaN	NaN	NaN	NaN
Q7V2T8	Uncharacterized protein	Uncharacterized	0.0159759	0.0165283	24.3821	24.4545	-0.0723769	0.791645	4	4	4	80	80	80	10.076	0	31.322	1867700000	51	4	4	4	1	4	4	4	3	4	4	4	4	4	3	4	4	4	4	4	3	4	4	90	90	1	43	NaN	NaN	NaN	NaN
Q7V2U0	Cyanate hydratase	Inorganic Nutrient Processing	0.0367844	0.0361202	25.8514	25.8564	-0.00500997	0.994611	5	5	5	93.1	93.1	93.1	10.014	0	35.977	1669200000	46	5	5	5	1	5	5	5	5	4	4	5	5	5	5	4	4	5	5	5	5	4	4	87	87	1	53	NaN	NaN	NaN	NaN
Q7V2U1	Putative cyanate ABC transporter	Membrane Transport	0.0230279	0.0251089	26.1131	26.2786	-0.165471	0.722228	3	3	3	34.4	34.4	34.4	13.689	0	14.385	252390000	9	3	3	3	1	3	3	3	3	3	3	3	3	3	3	3	3	3	3	3	3	3	3	122	122	1	18	NaN	NaN	NaN	NaN
Q7V2U3	Putative cyanate ABC transporter, substrate binding protein	Membrane Transport	0.0397085	0.0375137	27.8947	27.8421	0.05255	0.773328	4	4	4	43.5	43.5	43.5	16.536	0	30.975	659730000	30	4	4	4	1	4	3	3	3	2	3	4	3	3	3	2	3	4	3	3	3	2	3	147	147	1	30	NaN	NaN	NaN	NaN
Q7V2U4	Uncharacterized protein	Uncharacterized	0.0499424	0.0456537	25.7645	25.6671	0.0974674	0.70392	5	5	5	24.6	24.6	24.6	32.043	0	66.303	988920000	39	5	5	5	1	5	4	5	5	5	5	5	4	5	5	5	5	5	4	5	5	5	5	284	284	1	33	NaN	NaN	NaN	NaN
Q7V2U5	Uncharacterized protein	Uncharacterized	0.0386849	0.0384324	25.7342	25.7571	-0.0229047	0.951744	15	15	15	41.5	41.5	41.5	61.613	0	164.58	6847300000	123	15	15	15	1	15	13	14	14	14	14	15	13	14	14	14	14	15	13	14	14	14	14	561	561	1	120	NaN	NaN	NaN	NaN
Q7V2U6	Type-1 copper (Blue) domain	Other	0.00994244	0.00768311	23.8326	23.4677	0.364846	0.416592	3	3	3	36.3	36.3	36.3	11.526	0	5.2842	467500000	12	3	3	3	1	2	3	3	2	2	3	2	3	3	2	2	3	2	3	3	2	2	3	102	102	1	17	NaN	NaN	NaN	NaN
Q7V2U7	Possible DsrE-like protein	Other	0.053031	0.0461272	26.1428	25.9698	0.173079	0.569851	5	5	5	37.2	37.2	37.2	14.4	0	41.019	1212200000	27	5	5	5	1	4	3	4	4	5	4	4	3	4	4	5	4	4	3	4	4	5	4	129	129	1	39	NaN	NaN	NaN	NaN
Q7V2U9	Uncharacterized protein	Uncharacterized	0.00967506	0.0122435	23.3321	23.7097	-0.377595	0.33915	2	2	2	13.4	13.4	13.4	14.284	0	4.8169	160550000	10	2	2	2	1	2	2	2	2	2	2	2	2	2	2	2	2	2	2	2	2	2	2	134	134	1	12	NaN	NaN	NaN	NaN
Q7V2V4	Uncharacterized protein	Uncharacterized	0.00536131	0.0148181	22.626	24.1896	-1.56357	0.156606	4	4	4	54.4	54.4	54.4	13.625	0	53.49	1452900000	35	4	4	4	1	4	3	4	3	4	3	4	3	4	3	4	3	4	3	4	3	4	3	125	125	1	35	NaN	NaN	NaN	NaN
Q7V2V5	Glycosyl transferase family 11	Central Metabolism	0.00584128	0.00553173	24.1143	24.0494	0.0649541	0.889055	4	4	4	32.7	32.7	32.7	11.58	0	5.7577	183470000	19	4	4	4	1	4	3	3	3	3	3	4	3	3	3	3	3	4	3	3	3	3	3	98	98	1	19	NaN	NaN	NaN	NaN
Q7V2W1	Putative bacterioferritin comigratory protein	Oxidative Stress	0.0422774	0.0423202	26.0726	26.1039	-0.0313428	0.895911	2	2	2	25.7	25.7	25.7	12.88	0	9.0398	163020000	13	2	2	2	1	1	2	2	2	2	2	1	2	2	2	2	2	1	2	2	2	2	2	113	113	1	13	NaN	NaN	NaN	NaN
Q7V2W2	Sec-independent protein translocase protein TatA	Membrane Transport	0.0610619	0.061258	25.9689	26.0031	-0.034146	0.891367	6	6	6	22	22	22	32.159	0	12.416	302730000	23	6	6	6	1	4	4	5	5	6	5	4	4	5	5	6	5	4	4	5	5	6	5	277	277	1	29	NaN	NaN	NaN	NaN
Q7V2W3	Conserved hypothetical	Uncharacterized	0.0203427	0.0247086	23.9014	24.2508	-0.349443	0.633363	9	9	9	59.1	59.1	59.1	16.81	0	18.273	1544700000	44	9	9	9	1	8	8	7	8	8	7	8	8	7	8	8	7	8	8	7	8	8	7	149	149	1	51	NaN	NaN	NaN	NaN
Q7V2W4	Uncharacterized protein	Uncharacterized	0.075993	0.0793464	27.0758	27.1669	-0.0911503	0.544119	7	7	7	59.4	59.4	59.4	10.752	0	259.86	2041100000	79	7	7	7	1	6	6	7	7	7	6	6	6	7	7	7	6	6	6	7	7	7	6	96	96	1	65	NaN	NaN	NaN	NaN
Q7V2W5	Bacterial-type phytoene dehydrogenase	Central Metabolism	0.00518437	0.00486088	24.8191	24.7552	0.0639464	0.829995	2	2	2	33.8	33.8	33.8	8.105	0	10.22	161520000	14	2	2	2	1	1	2	2	2	2	2	1	2	2	2	2	2	1	2	2	2	2	2	71	71	1	12	NaN	NaN	NaN	NaN
Q7V2W6	Conserved hypothetical	Uncharacterized	0.0446931	0.0522881	25.5594	25.8187	-0.259274	0.38135	8	8	8	44.6	44.6	44.6	18.753	0	50.071	1497600000	50	8	8	8	1	7	6	7	7	8	7	7	6	7	7	8	7	7	6	7	7	8	7	166	166	1	52	NaN	NaN	NaN	NaN
Q7V2W8	Conserved hypothetical	Uncharacterized	0.00361269	0.00330516	22.6943	22.6023	0.0920385	0.843676	8	8	8	13.7	13.7	13.7	56.264	0	13.839	466730000	30	8	8	8	1	7	7	7	5	6	6	7	7	7	5	6	6	7	7	7	5	6	6	510	510	1	39	NaN	NaN	NaN	NaN
Q7V2X0	GCN5-related N-acetyltransferase	Central Metabolism	0.0164671	0.0150088	25.668	25.5898	0.0782331	0.929094	7	7	7	57.6	57.6	57.6	11.084	0	38.032	1389900000	51	7	7	7	1	6	6	6	7	7	6	6	6	6	7	7	6	6	6	6	7	7	6	99	99	1	51	NaN	NaN	NaN	NaN
Q7V2X1	Aldehyde dehydrogenase	Central Metabolism	0.033478	0.0323231	27.3732	27.3511	0.0220896	0.924586	4	4	4	23.7	23.7	23.7	20.441	0	10.913	82626000	7	4	4	4	1	2	2	2	3	3	3	2	2	2	3	3	3	2	2	2	3	3	3	169	169	1	15	NaN	NaN	NaN	NaN
Q7V2X2	Possible LysM domain	Central Metabolism	0.0641462	0.0643079	27.437	27.4722	-0.0351493	0.849456	2	2	2	10.8	10.8	10.8	33.396	0	7.035	481010000	15	2	2	2	1	2	2	2	2	2	2	2	2	2	2	2	2	2	2	2	2	2	2	295	295	1	12	NaN	NaN	NaN	NaN
Q7V2X3	Photosystem I reaction center subunit IV	Photosynthesis	0.262607	0.239426	27.5975	27.4909	0.106595	0.60517	29	29	29	52.1	52.1	52.1	52.773	0	266.96	6739100000	213	29	29	29	1	27	27	28	28	27	28	27	27	28	28	27	28	27	27	28	28	27	28	463	463	1	230	NaN	NaN	NaN	NaN
Q7V2X6	Cytochrome b6	Photosynthesis	0.0557183	0.0563548	27.0219	27.0611	-0.0392316	0.917495	27	27	27	72.3	72.3	72.3	29.277	0	323.31	12099000000	202	27	27	27	1	27	25	25	25	26	25	27	25	25	25	26	25	27	25	25	25	26	25	253	253	1	242	NaN	NaN	NaN	NaN
Q7V2X7	Uncharacterized protein	Uncharacterized	0.0293413	0.0261638	27.0378	26.9027	0.135163	0.257965	5	5	5	72.5	72.5	72.5	7.6054	0	49.72	5025000000	63	5	5	5	1	5	5	5	5	5	5	5	5	5	5	5	5	5	5	5	5	5	5	69	69	1	54	NaN	NaN	NaN	NaN
Q7V2X8	Probable septum site-determining protein MinC	Other	0.00596396	0.00690514	23.8057	24.048	-0.242221	0.413369	5	5	5	27.1	27.1	27.1	24.675	0	24.45	2368700000	39	5	5	5	1	4	4	4	5	5	4	4	4	4	5	5	4	4	4	4	5	5	4	218	218	1	39	NaN	NaN	NaN	NaN
Q7V2X9	Site-determining protein	Other	0.2112	0.214628	29.2551	29.3084	-0.053285	0.806005	18	18	18	48.9	48.9	48.9	48.909	0	94.129	4774400000	137	18	18	18	1	17	18	18	16	14	17	17	18	18	16	14	17	17	18	18	16	14	17	419	419	1	151	NaN	NaN	NaN	NaN
Q7V2Y0	Cell division topological specificity factor	Basic Cellular Processes	0.0855086	0.0708517	26.5995	26.3552	0.24427	0.2663	5	5	5	33.2	33.2	33.2	24.673	0	16.045	271980000	24	5	5	5	1	4	4	4	4	5	4	4	4	4	4	5	4	4	4	4	4	5	4	220	220	1	27	NaN	NaN	NaN	NaN
Q7V2Y1	Uncharacterized protein	Uncharacterized	0.0415277	0.0441615	26.4297	26.5469	-0.117208	0.19928	22	22	22	63.8	63.8	63.8	29.758	0	300	21975000000	290	22	22	22	1	21	20	21	22	21	21	21	20	21	22	21	21	21	20	21	22	21	21	271	271	1	279	NaN	NaN	NaN	NaN
Q7V2Y3	Possible ferredoxin	Photosynthesis	0.0160078	0.0159796	24.3581	24.3871	-0.0290095	0.929391	11	11	11	72.6	72.6	72.6	12.164	0	87.137	3621000000	90	11	11	11	1	9	9	11	10	10	10	9	9	11	10	10	10	9	9	11	10	10	10	106	106	1	109	NaN	NaN	NaN	NaN
Q7V2Y4	Photosystem II CP47 reaction center protein	Photosynthesis	0.186433	0.18943	29.9814	30.0329	-0.0514228	0.771174	8	8	8	54.6	54.6	54.6	21.377	0	66.988	2023200000	61	8	8	8	1	8	8	8	8	8	8	8	8	8	8	8	8	8	8	8	8	8	8	194	194	1	54	NaN	NaN	NaN	NaN
Q7V2Y6	Transcriptional repressor NrdR	Basic Cellular Processes	0.0463795	0.0472866	26.3025	26.3583	-0.0557944	0.473434	4	4	4	25.8	25.8	25.8	13.153	0	13.49	511000000	30	4	4	4	1	4	4	4	4	4	4	4	4	4	4	4	4	4	4	4	4	4	4	120	120	1	30	NaN	NaN	NaN	NaN
Q7V2Y7	30S ribosomal protein S1, homolog A	Basic Cellular Processes	0.141965	0.139547	29.1062	29.1108	-0.00461833	0.988978	32	32	32	42.8	42.8	42.8	56.09	0	323.31	54646000000	422	32	32	32	1	29	30	32	30	31	31	29	30	32	30	31	31	29	30	32	30	31	31	507	507	1	435	NaN	NaN	NaN	NaN
Q7V2Y8	S-adenosylmethionine synthase	Central Metabolism	0.161742	0.148838	29.4809	29.3892	0.0917066	0.316407	11	11	11	52.8	52.8	52.8	18.094	0	72.654	1712200000	70	11	11	11	1	10	10	8	10	10	11	10	10	8	10	10	11	10	10	8	10	10	11	159	159	1	76	NaN	NaN	NaN	NaN
Q7V2Y9	Carbohydrate kinase, FGGY family	Central Metabolism	0.00334554	0.00334809	23.8717	23.8878	-0.0160376	0.979208	31	31	31	71.6	71.6	71.6	40.875	0	323.31	30550000000	397	31	31	31	1	28	27	31	30	31	28	28	27	31	30	31	28	28	27	31	30	31	28	363	363	1	391	NaN	NaN	NaN	NaN
Q7V2Z2	Phycoerythrobilin lyase CpeS	Photosynthesis	0.00454483	0.00394208	23.1372	22.9559	0.181327	0.760502	37	37	37	74.1	74.1	74.1	45.083	0	323.31	38634000000	376	37	37	37	1	32	32	35	34	32	34	32	32	35	34	32	34	32	32	35	34	32	34	413	413	1	366	NaN	NaN	NaN	NaN
Q7V2Z3	R-phycoerythrin subunit beta	Photosynthesis	0.00636598	0.00543829	23.5595	23.1712	0.388297	0.819834	11	11	11	30.6	30.6	30.6	45.187	0	32.812	349460000	36	11	11	11	1	7	6	5	10	4	5	7	6	5	10	4	5	7	6	5	10	4	5	409	409	1	40	NaN	NaN	NaN	NaN
Q7V2Z4	DNA helicase	Basic Cellular Processes	0.00446665	0.00481969	25.2602	25.397	-0.136846	0.416085	7	7	7	40.4	40.4	40.4	21.154	0	131.24	266740000	32	7	7	7	1	6	5	5	4	4	5	6	5	5	4	4	5	6	5	5	4	4	5	183	183	1	42	NaN	NaN	NaN	NaN
Q7V2Z5	Selenide,water dikinase	Other	0.0141221	0.0136602	26.7849	26.7659	0.0190811	0.792872	2	2	2	18.9	18.9	18.9	19.606	0	8.8262	159300000	12	2	2	2	1	2	2	1	2	2	1	2	2	1	2	2	1	2	2	1	2	2	1	175	175	1	14	NaN	NaN	NaN	NaN
Q7V2Z6	S-methyl-5-thioadenosine phosphorylase	Central Metabolism	0.0751185	0.0715374	27.9475	27.9049	0.0426737	0.538378	30	30	30	39.8	39.8	39.8	91.791	0	107.17	2121700000	109	30	30	30	1	22	21	23	19	19	22	22	21	23	19	19	22	22	21	23	19	19	22	802	802	1	141	NaN	NaN	NaN	NaN
Q7V2Z7	Photosystem II reaction center protein J	Photosynthesis	0.259761	0.247113	27.4684	27.4282	0.040191	0.937496	27	27	27	45.9	45.9	45.9	82.355	0	119.65	3599200000	127	27	27	27	1	21	21	24	20	25	22	21	21	24	20	25	22	21	21	24	20	25	22	730	730	1	156	NaN	NaN	NaN	NaN
Q7V2Z8	Photosystem II reaction center protein L	Photosynthesis	0.0270825	0.0259008	23.4931	23.4548	0.0383803	0.941029	10	10	10	36.8	36.8	36.8	34.528	0	107.02	4296500000	59	10	10	10	1	7	8	8	9	8	9	7	8	8	9	8	9	7	8	8	9	8	9	307	307	1	71	NaN	NaN	NaN	NaN
Q7V2Z9	Cytochrome b559 subunit beta	Photosynthesis	0.119762	0.101978	25.9102	25.7074	0.202769	0.378711	3	3	3	25	25	25	6.8889	0	3.8972	2959400000	32	3	3	3	1	3	3	3	3	3	3	3	3	3	3	3	3	3	3	3	3	3	3	64	64	1	40	NaN	NaN	NaN	NaN
Q7V301	Ycf48-like protein	Photosynthesis	0.0608305	0.0618028	27.7751	27.8278	-0.0526129	0.724342	1	1	1	41	41	41	4.4301	0	11.422	117020000	15	1	1	1	1	1	1	1	1	1	1	1	1	1	1	1	1	1	1	1	1	1	1	39	39	1	12	NaN	NaN	NaN	NaN
Q7V302	Probable rubredoxin	Energy Production and Conversion	0.0508715	0.0414477	26.2652	25.9981	0.267061	0.44805	2	2	2	44.7	44.7	44.7	5.2633	0	9.2975	743270000	16	2	2	2	1	2	2	2	2	2	2	2	2	2	2	2	2	2	2	2	2	2	2	47	47	1	17	NaN	NaN	NaN	NaN
Q7V303	NAD(P)H-quinone oxidoreductase subunit K	Photosynthesis	0.0279706	0.0320675	26.1851	26.411	-0.22589	0.476032	18	18	18	50.1	50.1	50.1	37.204	0	167.67	8283000000	169	18	18	18	1	15	16	16	15	17	15	15	16	16	15	17	15	15	16	16	15	17	15	337	337	1	161	NaN	NaN	NaN	NaN
Q7V304	NAD(P)H-quinone oxidoreductase subunit J	Photosynthesis	0.025427	0.0273087	25.5788	25.7123	-0.133441	0.519309	8	8	8	54.2	54.2	54.2	15.874	0	48.547	1219800000	58	8	8	8	1	5	6	7	8	6	6	5	6	7	8	6	6	5	6	7	8	6	6	142	142	1	55	NaN	NaN	NaN	NaN
Q7V305	Putative gluconeogenesis factor	Basic Cellular Processes	0.0129302	0.013202	25.9259	25.9861	-0.0602182	0.606125	9	9	9	48	48	48	27.236	0	52.463	1681200000	54	9	9	9	1	8	7	7	8	7	9	8	7	7	8	7	9	8	7	7	8	7	9	244	244	1	58	NaN	NaN	NaN	NaN
Q7V306	Possible ABC transporter, ATP binding component	Membrane Transport	0.00732676	0.00790511	24.4111	24.5521	-0.141019	0.381523	6	6	6	52.8	52.8	52.8	20.251	0	76.898	1249700000	35	6	6	6	1	5	6	6	6	6	4	5	6	6	6	6	4	5	6	6	6	6	4	176	176	1	40	NaN	NaN	NaN	NaN
Q7V307	Possible ABC transporter	Membrane Transport	0.0454012	0.041583	27.0891	26.9922	0.0969868	0.647659	20	20	20	53.2	53.2	53.2	48.363	0	136.35	3340000000	114	20	20	20	1	20	17	20	20	19	19	20	17	20	20	19	19	20	17	20	20	19	19	440	440	1	142	NaN	NaN	NaN	NaN
Q7V308	Possible 2-amino-4-hydroxy-6-hydroxymethyldihydropteridine pyrophosphokinase	Central Metabolism	0.0408166	0.046525	26.3439	26.5693	-0.225348	0.38063	8	8	8	38.6	38.6	38.6	30.288	0	31.302	556670000	31	8	8	8	1	6	7	5	7	7	7	6	7	5	7	7	7	6	7	5	7	7	7	272	272	1	45	NaN	NaN	NaN	NaN
Q7V309	NUDIX hydrolase	Basic Cellular Processes	0.153424	0.148928	28.2619	28.2444	0.0174955	0.944748	14	14	14	59.8	59.8	59.8	31.481	0	129.13	3484800000	77	14	14	14	1	12	12	12	11	13	10	12	12	12	11	13	10	12	12	12	11	13	10	281	281	1	99	NaN	NaN	NaN	NaN
Q7V310	Putative DNA photolyase	Basic Cellular Processes	0.0418588	0.0408996	27.7409	27.7366	0.00427818	0.993027	4	4	4	26.2	26.2	26.2	22.019	0	8.5787	691530000	10	4	4	4	1	2	3	4	4	2	2	2	3	4	4	2	2	2	3	4	4	2	2	187	187	1	17	NaN	NaN	NaN	NaN
Q7V311	Putative pleiotropic regulatory protein	Central Metabolism	0.0178759	0.0167413	26.259	26.1947	0.064298	0.617716	11	11	11	69.5	69.5	69.5	21.259	0	54.132	4148200000	67	11	11	11	1	9	10	9	10	10	10	9	10	9	10	10	10	9	10	9	10	10	10	187	187	1	75	NaN	NaN	NaN	NaN
Q7V313	Enoyl-[acyl-carrier-protein] reductase [NADH]	Central Metabolism	0.139582	0.136271	28.6007	28.5947	0.00596237	0.967932	17	17	17	41.6	41.6	41.6	55.858	0	112.76	2937300000	77	17	17	17	1	13	16	13	14	12	12	13	16	13	14	12	12	13	16	13	14	12	12	478	478	1	84	NaN	NaN	NaN	NaN
Q7V314	Imidazoleglycerol-phosphate dehydratase	Central Metabolism	0.0242855	0.0210825	25.7024	25.529	0.173442	0.488902	15	15	15	50.6	50.6	50.6	44.878	0	130.87	3276800000	108	15	15	15	1	14	14	15	13	13	13	14	14	15	13	13	13	14	14	15	13	13	13	401	401	1	108	NaN	NaN	NaN	NaN
Q7V315	Dioxygenase	Central Metabolism	0.0154171	0.013515	26.3861	26.224	0.162053	0.214319	21	21	21	76.2	76.2	76.2	27.715	0	253.9	29917000000	276	21	21	21	1	18	19	20	20	21	21	18	19	20	20	21	21	18	19	20	20	21	21	260	260	1	274	NaN	NaN	NaN	NaN
Q7V316	dITP/XTP pyrophosphatase	Central Metabolism	0.00640045	0.00698564	23.7063	23.8639	-0.157537	0.409065	4	4	4	26.4	26.4	26.4	22.432	0	22.733	1044200000	34	4	4	4	1	4	4	4	4	4	4	4	4	4	4	4	4	4	4	4	4	4	4	201	201	1	41	NaN	NaN	NaN	NaN
Q7V317	Phosphotransferase superclass	Central Metabolism	0.0230704	0.0212901	26.9067	26.8191	0.0875422	0.193474	19	19	19	43.6	43.6	43.6	56.711	0	104.51	2988700000	120	19	19	19	1	17	18	18	17	16	19	17	18	18	17	16	19	17	18	18	17	16	19	507	507	1	137	NaN	NaN	NaN	NaN
Q7V318	Uncharacterized protein	Uncharacterized	0.0163948	0.0184287	26.3715	26.5687	-0.197185	0.188	5	5	5	24.6	24.6	24.6	21.479	0	7.8568	192190000	21	5	5	5	1	4	3	5	4	5	3	4	3	5	4	5	3	4	3	5	4	5	3	191	191	1	25	NaN	NaN	NaN	NaN
Q7V319	Uncharacterized protein	Uncharacterized	0.00655477	0.00567354	24.3026	24.1256	0.176998	0.320729	37	37	37	70.4	70.4	70.4	55.446	0	323.31	8123000000	237	37	37	37	1	34	34	33	35	35	32	34	34	33	35	35	32	34	34	33	35	35	32	486	486	1	267	NaN	NaN	NaN	NaN
Q7V320	Orotate phosphoribosyltransferase	Central Metabolism	0.306601	0.327859	29.2537	29.3785	-0.124769	0.114667	5	5	5	11.7	11.7	11.7	55.358	0	7.3497	715940000	16	5	5	5	1	3	5	3	4	5	4	3	5	3	4	5	4	3	5	3	4	5	4	472	472	1	25	NaN	NaN	NaN	NaN
Q7V321	Uncharacterized protein	Uncharacterized	0.0591931	0.0567573	28.0627	28.0297	0.0329914	0.793818	10	10	10	40.8	40.8	40.8	32.358	0	33.573	616750000	34	10	10	10	1	7	9	9	8	9	6	7	9	9	8	9	6	7	9	9	8	9	6	282	282	1	51	NaN	NaN	NaN	NaN
Q7V322	Probable oxidoreductase	Central Metabolism	0.024788	0.0228702	26.4684	26.3813	0.0870476	0.382034	14	14	14	52.7	52.7	52.7	20.215	0	245.47	10971000000	109	14	14	14	1	14	14	13	13	13	13	14	14	13	13	13	13	14	14	13	13	13	13	186	186	1	118	NaN	NaN	NaN	NaN
Q7V325	Two-component sensor histidine kinase	Central Metabolism	0.0139781	0.0135985	25.8182	25.809	0.00916862	0.980406	20	20	20	37.4	37.4	37.4	47.27	0	69.175	6566900000	137	20	20	20	1	17	19	19	20	18	18	17	19	19	20	18	18	17	19	19	20	18	18	422	422	1	166	NaN	NaN	NaN	NaN
Q7V326	Uncharacterized protein	Uncharacterized	0.012756	0.0142896	24.0046	24.2413	-0.236643	0.788851	12	12	12	46.7	46.7	46.7	36.948	0	112.64	3660200000	105	12	12	12	1	12	12	12	12	12	12	12	12	12	12	12	12	12	12	12	12	12	12	334	334	1	105	NaN	NaN	NaN	NaN
Q7V327	Probable esterase	Central Metabolism	0.0146844	0.0149357	25.0098	25.0425	-0.0326951	0.958156	20	20	20	53.7	53.7	53.7	42.924	0	99.305	2688600000	122	20	20	20	1	15	18	17	16	19	19	15	18	17	16	19	19	15	18	17	16	19	19	378	378	1	144	NaN	NaN	NaN	NaN
Q7V328	Uncharacterized protein	Uncharacterized	0.10529	0.118927	27.7108	27.9119	-0.201028	0.344796	3	3	3	35.2	35.2	35.2	14.256	0	11.968	193330000	13	3	3	3	1	1	2	3	2	2	2	1	2	3	2	2	2	1	2	3	2	2	2	122	122	1	13	NaN	NaN	NaN	NaN
Q7V329	4-hydroxy-3-methylbut-2-enyl diphosphate reductase	Central Metabolism	0.0109578	0.0104788	25.5426	25.5084	0.0342312	0.888784	6	6	6	36.1	36.1	36.1	22.85	0	52.001	649790000	35	6	6	6	1	5	6	6	5	6	6	5	6	6	5	6	6	5	6	6	5	6	6	205	205	1	43	NaN	NaN	NaN	NaN
Q7V330	Ammonium transporter	Membrane Transport	2.05444	1.77516	33.3835	33.2007	0.182799	0.207698	3	3	3	19.9	19.9	19.9	20.386	0	8.7127	1751000000	18	3	3	3	1	3	3	3	3	3	3	3	3	3	3	3	3	3	3	3	3	3	3	186	186	1	24	NaN	NaN	NaN	NaN
Q7V331	Sugar fermentation stimulation protein homolog	Basic Cellular Processes	0.0169788	0.0175989	25.4809	25.5723	-0.0914167	0.807951	11	11	11	28.6	28.6	28.6	45.202	0	27.343	1042700000	55	11	11	11	1	10	10	10	10	11	10	10	10	10	10	11	10	10	10	10	10	11	10	398	398	1	84	NaN	NaN	NaN	NaN
Q7V335	Serine hydroxymethyltransferase	Central Metabolism	0.147513	0.140438	29.383	29.3407	0.0423234	0.606136	6	6	6	12.8	12.8	12.8	50.8	0	33.577	141980000000	273	6	6	6	1	4	6	5	6	6	6	4	6	5	6	6	6	4	6	5	6	6	6	486	486	1	238	NaN	NaN	NaN	NaN
Q7V336	3-isopropylmalate dehydratase large subunit	Central Metabolism	0.00293757	0.00295027	23.8822	23.9145	-0.0323404	0.892277	11	11	11	40.7	40.7	40.7	28.363	0	77.251	1046300000	50	11	11	11	1	8	9	8	11	11	10	8	9	8	11	11	10	8	9	8	11	11	10	248	248	1	62	NaN	NaN	NaN	NaN
Q7V338	Uncharacterized protein	Uncharacterized	0.0111945	0.0106966	26.3399	26.3065	0.0334918	0.889175	31	31	31	78.5	78.5	78.5	46.407	0	299.38	24357000000	272	31	31	31	1	29	24	30	30	28	29	29	24	30	30	28	29	29	24	30	30	28	29	423	423	1	268	NaN	NaN	NaN	NaN
Q7V342	Peptidyl-tRNA hydrolase	Basic Cellular Processes	0.0148803	0.0149121	25.0144	25.0461	-0.031669	0.482862	10	10	10	36.7	36.7	36.7	51.474	0	29.496	505220000	42	10	10	10	1	8	7	7	7	5	7	8	7	7	7	5	7	8	7	7	7	5	7	469	469	1	51	NaN	NaN	NaN	NaN
Q7V344	Uncharacterized protein	Uncharacterized	0.00844984	0.00787616	23.7128	23.5771	0.135689	0.889425	35	35	35	49.3	49.3	49.3	77.654	0	255.59	6022100000	214	35	35	35	1	33	34	34	34	33	34	33	34	34	34	33	34	33	34	34	34	33	34	678	678	1	246	NaN	NaN	NaN	NaN
Q7V345	Uncharacterized protein	Uncharacterized	0.0152955	0.0151187	25.7244	25.7349	-0.0105152	0.963663	9	9	9	48.3	48.3	48.3	23.634	0	40.571	867490000	45	9	9	9	1	8	8	8	7	6	8	8	8	8	7	6	8	8	8	8	7	6	8	203	203	1	49	NaN	NaN	NaN	NaN
Q7V346	Cob(I)alamin adenosyltransferase	Central Metabolism	0.00332456	0.00432394	22.762	23.1603	-0.398342	0.303779	4	4	4	29.7	29.7	29.7	16.783	0	5.331	103170000	15	4	4	4	1	4	2	2	3	2	2	4	2	2	3	2	2	4	2	2	3	2	2	145	145	1	15	NaN	NaN	NaN	NaN
Q7V347	Possible Thy1 protein homolog	Membrane Transport	0.0869275	0.0894785	27.6234	27.6935	-0.0700658	0.472092	8	8	8	32.5	32.5	32.5	36.857	0	42.572	958840000	39	8	8	8	1	8	5	6	8	8	8	8	5	6	8	8	8	8	5	6	8	8	8	323	323	1	53	NaN	NaN	NaN	NaN
Q7V349	Phosphoglucosamine mutase	Central Metabolism	0.00936724	0.00881812	25.4997	25.4427	0.0570647	0.609133	4	4	4	32.5	32.5	32.5	21.691	0	23.699	105970000	17	4	4	4	1	2	2	3	3	3	4	2	2	3	3	3	4	2	2	3	3	3	4	191	191	1	18	NaN	NaN	NaN	NaN
Q7V351	Uncharacterized protein	Uncharacterized	0.00730132	0.00845877	24.0135	24.2538	-0.240277	0.26282	17	17	17	75	75	75	24.801	0	264.94	8744100000	162	17	17	17	1	15	17	16	16	16	15	15	17	16	16	16	15	15	17	16	16	16	15	212	212	1	190	NaN	NaN	NaN	NaN
Q7V352	Isoleucine--tRNA ligase	Basic Cellular Processes	0.0169835	0.0161975	27.4548	27.4138	0.0409877	0.663621	27	27	27	66.4	66.4	66.4	50.344	0	157.15	3139900000	138	27	27	27	1	22	22	24	20	20	22	22	22	24	20	20	22	22	22	24	20	20	22	452	452	1	173	NaN	NaN	NaN	NaN
Q7V353	Uncharacterized protein	Uncharacterized	0.00458285	0.0048038	23.0903	23.1856	-0.095321	0.667313	2	2	2	4.8	4.8	4.8	23.904	0	11.068	219180000	12	2	2	2	1	2	2	2	2	2	2	2	2	2	2	2	2	2	2	2	2	2	2	207	207	1	12	NaN	NaN	NaN	NaN
Q7V354	Aspartyl/glutamyl-tRNA(Asn/Gln) amidotransferase subunit C	Central Metabolism	0.0386914	0.0434722	25.32	25.524	-0.203949	0.479055	59	59	59	61.1	61.1	61.1	111.41	0	323.31	17086000000	376	59	59	59	1	53	50	49	48	52	49	53	50	49	48	52	49	53	50	49	48	52	49	965	965	1	445	NaN	NaN	NaN	NaN
Q7V355	Aspartate carbamoyltransferase	Central Metabolism	0.0186053	0.0179898	26.0695	26.0511	0.0184097	0.941474	2	2	2	13.2	13.2	13.2	20.409	0	15.306	51918000	8	2	2	2	1	2	2	2	1	2	2	2	2	2	1	2	2	2	2	2	1	2	2	174	174	1	11	NaN	NaN	NaN	NaN
Q7V359	Coenzyme A biosynthesis bifunctional protein CoaBC	Central Metabolism	0.0108148	0.0114607	25.5952	25.7054	-0.110196	0.558327	4	4	4	54.6	54.6	54.6	11.411	0	61.488	663590000	32	4	4	4	1	4	4	4	4	4	3	4	4	4	4	4	3	4	4	4	4	4	3	97	97	1	34	NaN	NaN	NaN	NaN
Q7V360	Photosystem II manganese-stabilizing protein	Photosynthesis	0.230168	0.234874	29.3417	29.4002	-0.0585041	0.842745	20	20	20	57.7	57.7	57.7	37.167	0	134.91	2909900000	134	20	20	20	1	18	19	17	15	18	18	18	19	17	15	18	18	18	19	17	15	18	18	338	338	1	154	NaN	NaN	NaN	NaN
Q7V361	ATP-sulfurylase	Inorganic Nutrient Processing	0.0262472	0.0281507	26.7481	26.9083	-0.160203	0.807901	14	14	14	43.3	43.3	43.3	46.885	0	43.31	1572000000	56	14	14	14	1	10	10	12	10	10	9	10	10	12	10	10	9	10	10	12	10	10	9	418	418	1	68	NaN	NaN	NaN	NaN
Q7V362	ATP-dependent zinc metalloprotease FtsH	Basic Cellular Processes	0.125307	0.114645	29.6887	29.594	0.094684	0.642451	14	14	14	70.1	70.1	70.1	28.113	0	312.04	25511000000	229	14	14	14	1	14	14	14	14	14	14	14	14	14	14	14	14	14	14	14	14	14	14	264	264	1	186	NaN	NaN	NaN	NaN
Q7V364	Chorismate synthase	Central Metabolism	0.0809269	0.0784814	28.3003	28.2811	0.0191345	0.940968	21	21	21	58.8	58.8	58.8	44.709	0	201.47	4268200000	108	21	21	21	1	14	17	19	19	17	18	14	17	19	19	17	18	14	17	19	19	17	18	391	391	1	117	NaN	NaN	NaN	NaN
Q7V365	Photosystem II protein D1	Photosynthesis	0.186	0.17162	29.4772	29.3966	0.0806688	0.824574	42	37	37	69.9	66.5	66.5	66.745	0	323.31	63529000000	581	42	37	37	1	39	37	39	40	39	40	34	32	34	35	34	35	34	32	34	35	34	35	618	618	1	487	NaN	NaN	NaN	NaN
Q7V366	Glutathione S-transferase C terminus	Basic Cellular Processes	0.0132272	0.0137738	25.4746	25.5598	-0.085214	0.790345	26	26	26	68.4	68.4	68.4	39.342	0	323.31	16690000000	269	26	26	26	1	25	26	26	24	25	24	25	26	26	24	25	24	25	26	26	24	25	24	364	364	1	325	NaN	NaN	NaN	NaN
Q7V368	GTPase Obg	Basic Cellular Processes	0.0123407	0.0145663	25.4269	25.6996	-0.272645	0.257048	7	7	7	24.4	24.4	24.4	39.635	0	89.97	10403000000	101	7	7	7	1	7	7	7	6	7	7	7	7	7	6	7	7	7	7	7	6	7	7	360	360	1	110	NaN	NaN	NaN	NaN
Q7V369	Endonuclease MutS2	Basic Cellular Processes	0.00101566	0.000856137	23.0926	22.858	0.234585	0.799478	4	4	4	20	20	20	37.667	0	14.181	589060000	15	4	4	4	1	3	4	3	4	4	4	3	4	3	4	4	4	3	4	3	4	4	4	315	315	1	22	NaN	NaN	NaN	NaN
Q7V370	Delta-aminolevulinic acid dehydratase	Central Metabolism	0.0297989	0.0268039	26.7273	26.6058	0.121476	0.415159	7	7	7	26.9	26.9	26.9	35.439	0	42.965	769950000	45	7	7	7	1	6	7	7	6	7	7	6	7	7	6	7	7	6	7	7	6	7	7	327	327	1	46	NaN	NaN	NaN	NaN
Q7V371	Putative sulfate transporter	Membrane Transport	0.0384898	0.0382767	27.8246	27.8445	-0.0199057	0.939133	5	5	5	8.3	8.3	8.3	90.233	0	10.189	167740000	5	5	5	5	1	2	3	3	2	4	3	2	3	3	2	4	3	2	3	3	2	4	3	803	803	1	17	NaN	NaN	NaN	NaN
Q7V373	Uncharacterized protein	Uncharacterized	0.0564631	0.0571295	25.8125	25.8551	-0.042572	0.81119	23	23	23	73.6	73.6	73.6	37.555	0	197.53	6285300000	190	23	23	23	1	23	21	21	20	21	19	23	21	21	20	21	19	23	21	21	20	21	19	333	333	1	210	NaN	NaN	NaN	NaN
Q7V374	FAD-dependent pyridine nucleotide-disulphide oxidoreductase	Central Metabolism	0.0766616	0.0699117	28.0248	27.9226	0.102243	0.474966	13	13	13	21.6	21.6	21.6	57.563	0	91.465	8451400000	128	13	13	13	1	13	13	13	13	13	12	13	13	13	13	13	12	13	13	13	13	13	12	551	551	1	139	NaN	NaN	NaN	NaN
Q7V376	Possible kinase	Central Metabolism	0.0451439	0.0426064	28.0671	28.0117	0.0554708	0.30253	3	3	3	31.2	31.2	31.2	10.424	0	25.188	706150000	18	3	3	3	1	3	3	3	3	3	3	3	3	3	3	3	3	3	3	3	3	3	3	93	93	1	27	NaN	NaN	NaN	NaN
Q7V377	Enolase	Central Metabolism	0.147111	0.13849	29.4011	29.344	0.0570939	0.568952	25	25	25	71.1	71.1	71.1	34.398	0	177.54	13513000000	230	25	25	25	1	22	22	23	23	21	22	22	22	23	23	21	22	22	22	23	23	21	22	318	318	1	221	NaN	NaN	NaN	NaN
Q7V378	Putative ATP-dependent Clp protease, Hsp 100, ATP-binding subunit ClpB	Basic Cellular Processes	0.0206418	0.0205118	27.6652	27.6839	-0.0186927	0.891622	26	26	26	53.7	53.7	53.7	63.086	0	198.08	9279800000	151	26	26	26	1	23	23	25	21	25	22	23	23	25	21	25	22	23	23	25	21	25	22	555	555	1	163	NaN	NaN	NaN	NaN
Q7V379	Protein translocase subunit SecE	Basic Cellular Processes	0.123659	0.106636	26.7065	26.505	0.201518	0.607546	28	28	28	71.6	71.6	71.6	45.898	0	323.31	39595000000	367	28	28	28	1	26	25	26	25	26	26	26	25	26	25	26	26	26	25	26	25	26	26	430	430	1	328	NaN	NaN	NaN	NaN
Q7V380	Transcription termination/antitermination protein NusG	Basic Cellular Processes	0.154496	0.155914	28.3893	28.432	-0.0427672	0.665691	56	56	55	55.9	55.9	55.9	104.64	0	323.31	13028000000	359	56	56	55	1	52	54	52	50	52	51	52	54	52	50	52	51	51	53	51	49	51	50	919	919	1	412	NaN	NaN	NaN	NaN
Q7V381	50S ribosomal protein L11	Basic Cellular Processes	0.359999	0.368716	29.0855	29.1464	-0.0608877	0.728435	4	4	4	53.2	53.2	53.2	8.9653	0	17.32	1643200000	35	4	4	4	1	4	4	4	4	4	4	4	4	4	4	4	4	4	4	4	4	4	4	79	79	1	40	NaN	NaN	NaN	NaN
Q7V382	50S ribosomal protein L1	Basic Cellular Processes	0.114346	0.129163	28.1682	28.3675	-0.199334	0.303713	18	18	18	79.3	79.3	79.3	22.774	0	133.82	16791000000	181	18	18	18	1	16	15	17	16	17	18	16	15	17	16	17	18	16	15	17	16	17	18	203	203	1	195	NaN	NaN	NaN	NaN
Q7V383	50S ribosomal protein L10	Basic Cellular Processes	0.143959	0.166074	28.0751	28.3067	-0.231612	0.22163	7	7	7	42.6	42.6	42.6	14.773	0	30.546	7289900000	63	7	7	7	1	5	6	7	6	6	6	5	6	7	6	6	6	5	6	7	6	6	6	141	141	1	60	NaN	NaN	NaN	NaN
Q7V384	50S ribosomal protein L7/L12	Basic Cellular Processes	0.292587	0.364411	28.6713	29.0251	-0.353808	0.294027	19	19	19	83.4	83.4	83.4	25.591	0	209.73	14605000000	145	19	19	19	1	18	17	18	17	17	17	18	17	18	17	17	17	18	17	18	17	17	17	235	235	1	167	NaN	NaN	NaN	NaN
Q7V385	Ribonuclease H	Basic Cellular Processes	0.00828181	0.00725563	24.4098	24.2433	0.16645	0.433406	9	9	9	61.1	61.1	61.1	19.068	0	37.671	5915600000	54	9	9	9	1	9	8	9	8	8	8	9	8	9	8	8	8	9	8	9	8	8	8	175	175	1	78	NaN	NaN	NaN	NaN
Q7V386	Dihydroorotate dehydrogenase (quinone)	Central Metabolism	0.00583959	0.00589432	24.5989	24.6446	-0.0456994	0.892366	9	9	9	63.4	63.4	63.4	13.244	0	83.581	10089000000	61	9	9	9	1	7	7	8	8	9	9	7	7	8	8	9	9	7	7	8	8	9	9	131	131	1	73	NaN	NaN	NaN	NaN
Q7V387	Aminotransferase	Central Metabolism	0.00991927	0.00898221	25.3067	25.194	0.112612	0.615122	8	8	8	36.7	36.7	36.7	27.654	0	12.981	401830000	25	8	8	8	1	4	6	6	7	5	5	4	6	6	7	5	5	4	6	6	7	5	5	240	240	1	34	NaN	NaN	NaN	NaN
Q7V388	UDP-N-acetylglucosamine--N-acetylmuramyl-(pentapeptide) pyrophosphoryl-undecaprenol N-acetylglucosamine transferase	Central Metabolism	0.00432339	0.005227	24.0706	24.3626	-0.292027	0.461246	12	12	12	33.4	33.4	33.4	43.559	0	28.646	827390000	56	12	12	12	1	9	9	10	9	9	11	9	9	10	9	9	11	9	9	10	9	9	11	389	389	1	80	NaN	NaN	NaN	NaN
Q7V390	Phosphoglycerate kinase	Central Metabolism	0.425524	0.40776	30.8379	30.805	0.0328687	0.450033	9	9	9	25.4	25.4	25.4	43.009	0	33.793	792390000	46	9	9	9	1	8	8	8	9	8	9	8	8	8	9	8	9	8	8	8	9	8	9	374	374	1	54	NaN	NaN	NaN	NaN
Q7V391	Ribosome biogenesis GTPase A	Basic Cellular Processes	0.0090317	0.00950488	24.7984	24.8891	-0.0907097	0.799048	8	8	8	23.6	23.6	23.6	41.665	0	12.132	208080000	19	8	8	8	1	2	4	8	3	2	3	2	4	8	3	2	3	2	4	8	3	2	3	364	364	1	22	NaN	NaN	NaN	NaN
Q7V392	Pseudouridine synthase	Central Metabolism	0.00257247	0.00123543	22.8305	22.0561	0.774371	0.65792	31	31	31	79.1	79.1	79.1	42.964	0	323.31	89938000000	475	31	31	31	1	30	30	30	31	28	30	30	30	30	31	28	30	30	30	30	31	28	30	402	402	1	450	NaN	NaN	NaN	NaN
Q7V393	ABC transporter, ATP binding component, possibly for oligopeptides	Membrane Transport	0.00401273	0.00340802	24.5111	24.3038	0.207249	0.124727	10	10	10	34.4	34.4	34.4	32.976	0	10.865	631600000	36	10	10	10	1	9	9	9	10	9	9	9	9	9	10	9	9	9	9	9	10	9	9	288	288	1	60	NaN	NaN	NaN	NaN
Q7V395	tRNA modification GTPase MnmE	Basic Cellular Processes	0.0351	0.0335179	27.4302	27.3947	0.0355364	0.809239	3	3	3	12.1	12.1	12.1	36.377	0	17.457	22159000	9	3	3	3	1	0	3	1	2	3	3	0	3	1	2	3	3	0	3	1	2	3	3	322	322	1	13	NaN	NaN	NaN	NaN
Q7V396	Arginine--tRNA ligase	Basic Cellular Processes	0.0122755	0.0117391	26.3075	26.2704	0.0370585	0.724229	14	14	14	27.9	27.9	27.9	60.195	0	43.241	464570000	49	14	14	14	1	9	10	10	11	10	10	9	10	10	11	10	10	9	10	10	11	10	10	531	531	1	62	NaN	NaN	NaN	NaN
Q7V397	Aminotransferase	Central Metabolism	0.0202983	0.020627	26.3233	26.3752	-0.0518742	0.743541	28	28	27	63	63	61.5	51.474	0	323.31	7000000000	177	28	28	27	1	25	26	27	26	26	26	25	26	27	26	26	26	24	25	26	25	25	25	460	460	1	199	NaN	NaN	NaN	NaN
Q7V398	Uncharacterized protein	Uncharacterized	0.0138639	0.0133902	25.1602	25.1437	0.0165342	0.96363	43	43	43	53.7	53.7	53.7	69.643	0	201.21	5594300000	204	43	43	43	1	38	41	39	38	39	34	38	41	39	38	39	34	38	41	39	38	39	34	603	603	1	296	NaN	NaN	NaN	NaN
Q7V399	Para-aminobenzoate synthase component II	Central Metabolism	0.0186509	0.0162754	25.2983	25.1345	0.163836	0.532421	25	25	25	64.2	64.2	64.2	42.387	0	171.13	4128300000	171	25	25	25	1	22	22	23	22	20	22	22	22	23	22	20	22	22	22	23	22	20	22	369	369	1	192	NaN	NaN	NaN	NaN
Q7V3A4	Glutaredoxin	Oxidative Stress	0.0311247	0.0391448	24.5041	25.132	-0.62786	0.770387	9	9	9	39.3	39.3	39.3	27.108	0	17.958	875140000	43	9	9	9	1	8	9	7	7	9	8	8	9	7	7	9	8	8	9	7	7	9	8	242	242	1	56	NaN	NaN	NaN	NaN
Q7V3A7	Putative O-succinylbenzoate synthase	Central Metabolism	0.00809087	0.00833456	24.777	24.8646	-0.0875301	0.858128	7	7	7	44.9	44.9	44.9	22.097	0	28.458	627880000	30	7	7	7	1	4	6	5	4	5	4	4	6	5	4	5	4	4	6	5	4	5	4	198	198	1	30	NaN	NaN	NaN	NaN
Q7V3A8	Probable O-succinylbenzoic acid--CoA ligase (OSB-CoA synthetase)	Central Metabolism	0.0164577	0.0171326	26.1524	26.2408	-0.0884043	0.757354	4	4	4	65.5	65.5	65.5	9.8713	0	20.542	524880000	13	4	4	4	1	3	3	3	3	4	4	3	3	3	3	4	4	3	3	3	3	4	4	84	84	1	23	NaN	NaN	NaN	NaN
Q7V3A9	1,4-dihydroxy-2-naphthoyl-CoA hydrolase	Central Metabolism	0.0128645	0.0113229	24.3634	24.203	0.160357	0.666263	9	9	9	31.2	31.2	31.2	37.426	0	20.805	475510000	33	9	9	9	1	5	7	7	6	6	6	5	7	7	6	6	6	5	7	7	6	6	6	321	321	1	52	NaN	NaN	NaN	NaN
Q7V3B0	NAD(P)H-quinone oxidoreductase subunit H	Photosynthesis	0.0217	0.0212244	26.5144	26.5156	-0.00124105	1	8	8	8	23	23	23	46.498	0	19.348	1089600000	19	8	8	8	1	5	7	5	5	5	7	5	7	5	5	5	7	5	7	5	5	5	7	405	405	1	36	NaN	NaN	NaN	NaN
Q7V3B1	Ribosomal RNA small subunit methyltransferase H	Basic Cellular Processes	0.00479797	0.00485663	23.9454	23.9909	-0.04551	0.413661	2	2	2	13.3	13.3	13.3	17.388	0	5.4934	200940000	11	2	2	2	1	2	2	2	2	1	2	2	2	2	2	1	2	2	2	2	2	1	2	150	150	1	12	NaN	NaN	NaN	NaN
Q7V3B2	NifS-like aminotransferase class-V	Central Metabolism	0.0549972	0.0500888	27.8119	27.7037	0.108161	0.475487	25	25	25	61.3	61.3	61.3	45.242	0	132.18	6198500000	167	25	25	25	1	22	21	21	22	19	22	22	21	21	22	19	22	22	21	21	22	19	22	395	395	1	199	NaN	NaN	NaN	NaN
Q7V3B3	Two-component response regulator	Other	0.148413	0.158649	28.5857	28.71	-0.124233	0.299329	5	5	5	27	27	27	34.224	0	25.73	212740000	26	5	5	5	1	5	3	4	4	3	2	5	3	4	4	3	2	5	3	4	4	3	2	300	300	1	32	NaN	NaN	NaN	NaN
Q7V3B4	Mg-protoporphyrin IX methyltransferase	Photosynthesis	0.0465313	0.0466298	26.8574	26.8897	-0.0322793	0.856679	14	14	14	38	38	38	42.186	0	85.622	2631800000	81	14	14	14	1	9	11	10	10	12	10	9	11	10	10	12	10	9	11	10	10	12	10	382	382	1	79	NaN	NaN	NaN	NaN
Q7V3B5	N5-carboxyaminoimidazole ribonucleotide mutase	Central Metabolism	0.0646195	0.0687992	26.817	26.934	-0.117057	0.315753	20	20	20	69.8	69.8	69.8	27.426	0	310.58	26070000000	266	20	20	20	1	17	17	19	19	19	20	17	17	19	19	19	20	17	17	19	19	19	20	242	242	1	279	NaN	NaN	NaN	NaN
Q7V3B6	Adenylyl-sulfate kinase	Central Metabolism	0.0465558	0.0438038	26.6944	26.6337	0.060751	0.75742	8	8	8	36.9	36.9	36.9	26.601	0	31.724	1734000000	62	8	8	8	1	7	7	7	8	7	7	7	7	7	8	7	7	7	7	7	8	7	7	233	233	1	61	NaN	NaN	NaN	NaN
Q7V3B9	Uncharacterized protein	Uncharacterized	0.00444023	0.00444615	24.5252	24.5541	-0.028979	0.928248	7	7	7	36.8	36.8	36.8	17.385	0	43.854	1969100000	50	7	7	7	1	5	6	7	7	7	7	5	6	7	7	7	7	5	6	7	7	7	7	163	163	1	66	NaN	NaN	NaN	NaN
Q7V3C0	Citrate synthase	Central Metabolism	0.219028	0.207392	29.8025	29.7511	0.0514011	0.623943	6	6	6	35.6	35.6	35.6	23.247	0	27.47	1946700000	40	6	6	6	1	6	6	6	6	6	6	6	6	6	6	6	6	6	6	6	6	6	6	208	208	1	44	NaN	NaN	NaN	NaN
Q7V3C1	NAD(P)H-quinone oxidoreductase subunit 1	Photosynthesis	0.114031	0.127973	28.8197	29.0207	-0.200989	0.473119	16	16	16	41.4	41.4	41.4	57.189	0	59.808	690820000	64	16	16	16	1	12	15	10	10	12	9	12	15	10	10	12	9	12	15	10	10	12	9	485	485	1	77	NaN	NaN	NaN	NaN
Q7V3C2	NAD kinase 1	Central Metabolism	0.0142401	0.0112543	25.5056	25.196	0.309664	0.237307	24	24	24	64.8	64.8	64.8	42.875	0	189.39	32931000000	256	24	24	24	1	23	24	24	24	23	24	23	24	24	24	23	24	23	24	24	24	23	24	381	381	1	285	NaN	NaN	NaN	NaN
Q7V3C4	Bacterial regulatory protein, LuxR family	Basic Cellular Processes	0.079082	0.0823706	26.282	26.3665	-0.0845102	0.63416	5	5	5	15.6	15.6	15.6	40.388	0	33.762	5105900000	39	5	5	5	1	5	5	5	5	5	4	5	5	5	5	5	4	5	5	5	5	5	4	372	372	1	41	NaN	NaN	NaN	NaN
Q7V3C5	Methylenetetrahydrofolate reductase	Central Metabolism	0.038259	0.0375361	26.9202	26.9206	-0.000343323	1	6	6	6	23.7	23.7	23.7	34.128	0	29.88	468450000	35	6	6	6	1	6	6	6	5	6	4	6	6	6	5	6	4	6	6	6	5	6	4	299	299	1	34	NaN	NaN	NaN	NaN
Q7V3C6	Putative sugar-phosphate nucleotidyl transferase	Central Metabolism	0.00888093	0.0093708	25.2137	25.3229	-0.10914	0.635205	3	3	3	47.8	47.8	47.8	10.291	0	69.403	1276700000	28	3	3	3	1	3	3	2	2	3	3	3	3	2	2	3	3	3	3	2	2	3	3	92	92	1	37	NaN	NaN	NaN	NaN
Q7V3C8	NAD(P)H-quinone oxidoreductase chain 4	Photosynthesis	0.0382183	0.0408068	27.7969	27.9258	-0.128901	0.541591	15	15	15	62.8	62.8	62.8	32.708	0	109.89	3379800000	104	15	15	15	1	13	14	12	13	14	13	13	14	12	13	14	13	13	14	12	13	14	13	296	296	1	118	NaN	NaN	NaN	NaN
Q7V3D0	Uncharacterized protein	Uncharacterized	0.0123488	0.0130411	24.758	24.8659	-0.107896	0.412483	9	9	9	31.6	31.6	31.6	43.385	0	54.373	1100100000	71	9	9	9	1	9	8	8	7	8	8	9	8	8	7	8	8	9	8	8	7	8	8	392	392	1	67	NaN	NaN	NaN	NaN
Q7V3D1	NAD(P)H-quinone oxidoreductase subunit M	Photosynthesis	0.03499	0.0399789	25.4269	25.6472	-0.220284	0.305463	6	6	5	10.3	10.3	8.8	59.931	0	42.416	2678800000	46	6	6	5	1	6	5	6	6	6	6	6	5	6	6	6	6	5	4	5	5	5	5	546	546	1	48	NaN	NaN	NaN	NaN
Q7V3D2	Phytoene desaturase	Central Metabolism	0.0890914	0.0833636	28.8171	28.7492	0.0678927	0.469196	7	7	7	29.8	29.8	29.8	22.556	0	18.73	565750000	29	7	7	7	1	6	6	5	5	5	6	6	6	5	5	5	6	6	6	5	5	5	6	205	205	1	35	NaN	NaN	NaN	NaN
Q7V3D3	Squalene and phytoene synthases	Central Metabolism	0.0557606	0.0482761	27.4926	27.3126	0.180075	0.258581	6	6	6	55.7	55.7	55.7	13.431	0	31.25	607250000	39	6	6	6	1	4	6	5	4	5	4	4	6	5	4	5	4	4	6	5	4	5	4	115	115	1	34	NaN	NaN	NaN	NaN
Q7V3D4	RNA-binding region RNP-1 (RNA recognition motif)	Basic Cellular Processes	0.0676011	0.0807304	26.6432	26.9356	-0.292485	0.379314	35	35	35	72.3	72.3	72.3	53.353	0	276.5	24302000000	372	35	35	35	1	30	32	31	31	32	32	30	32	31	31	32	32	30	32	31	31	32	32	473	473	1	399	NaN	NaN	NaN	NaN
Q7V3D5	Poly A polymerase family	Basic Cellular Processes	0.0214863	0.0210043	26.5667	26.5667	3.17891e-06	1	14	14	14	50	50	50	35.563	0	57.953	2296100000	68	14	14	14	1	10	11	10	9	10	10	10	11	10	9	10	10	10	11	10	9	10	10	302	302	1	74	NaN	NaN	NaN	NaN
Q7V3D7	Uncharacterized protein	Uncharacterized	0.0165567	0.0156393	25.2538	25.1972	0.0565936	0.894962	10	10	10	61.9	61.9	61.9	15.726	0	50.585	2304200000	56	10	10	10	1	9	9	10	10	10	10	9	9	10	10	10	10	9	9	10	10	10	10	139	139	1	70	NaN	NaN	NaN	NaN
Q7V3D8	Putative 1-acyl-sn-glycerol-3-phosphate acyltransferase	Central Metabolism	0.0136457	0.0136121	24.894	24.9333	-0.0393467	0.946078	5	5	5	10.4	10.4	10.4	48.892	0	7.3159	711460000	28	5	5	5	1	4	5	5	4	4	5	4	5	5	4	4	5	4	5	5	4	4	5	415	415	1	27	NaN	NaN	NaN	NaN
Q7V3D9	Malonyl CoA-acyl carrier protein transacylase	Central Metabolism	0.0122374	0.0126177	25.2868	25.3576	-0.0708027	0.493069	5	5	5	33.8	33.8	33.8	24.958	0	20.88	464040000	21	5	5	5	1	4	3	4	5	3	2	4	3	4	5	3	2	4	3	4	5	3	2	216	216	1	21	NaN	NaN	NaN	NaN
Q7V3E0	3-oxoacyl-[acyl-carrier-protein] synthase 3	Central Metabolism	0.028855	0.026117	26.6926	26.5769	0.115687	0.147613	6	6	6	29.6	29.6	29.6	23.126	0	13.396	590380000	45	6	6	6	1	6	6	6	6	6	5	6	6	6	6	6	5	6	6	6	6	6	5	206	206	1	38	NaN	NaN	NaN	NaN
Q7V3E1	Phosphate acyltransferase	Central Metabolism	0.0250806	0.024012	26.9658	26.9312	0.0345491	0.771651	10	10	10	34.6	34.6	34.6	33.292	0	54.844	1070100000	38	10	10	10	1	7	8	6	6	7	6	7	8	6	6	7	6	7	8	6	6	7	6	298	298	1	45	NaN	NaN	NaN	NaN
Q7V3E2	Two-component response regulator	Other	0.334082	0.333706	29.7896	29.8188	-0.0291532	0.844762	16	16	16	69	69	69	36.465	0	83.429	3315500000	112	16	16	16	1	13	15	16	15	13	13	13	15	16	15	13	13	13	15	16	15	13	13	335	335	1	134	NaN	NaN	NaN	NaN
Q7V3E3	DNA repair protein RadA	Basic Cellular Processes	0.0286922	0.0295094	27.11	27.1792	-0.0691999	0.355676	26	26	26	47	47	47	49.856	0	198.4	9287800000	234	26	26	26	1	24	25	24	25	23	22	24	25	24	25	23	22	24	25	24	25	23	22	466	466	1	225	NaN	NaN	NaN	NaN
Q7V3E4	Photosystem I assembly protein Ycf3	Photosynthesis	0.00933494	0.0113192	24.109	24.4127	-0.303731	0.303612	26	26	26	81.9	81.9	81.9	27.909	0	323.31	45869000000	395	26	26	26	1	23	23	24	25	25	24	23	23	24	25	25	24	23	23	24	25	25	24	248	248	1	366	NaN	NaN	NaN	NaN
Q7V3E5	Putative P-type ATPase transporter for copper	Membrane Transport	0.00273831	0.00288778	24.4859	24.5909	-0.104939	0.518089	12	12	12	37.6	37.6	37.6	49.615	0	96.301	2646100000	88	12	12	12	1	11	12	12	11	10	10	11	12	12	11	10	10	11	12	12	11	10	10	450	450	1	91	NaN	NaN	NaN	NaN
Q7V3E6	Thymidylate kinase	Energy Production and Conversion	0.0110004	0.0118629	24.6512	24.7888	-0.137597	0.514771	7	7	7	31.2	31.2	31.2	20.058	0	24.555	306980000	19	7	7	7	1	4	5	5	6	5	6	4	5	5	6	5	6	4	5	5	6	5	6	173	173	1	40	NaN	NaN	NaN	NaN
Q7V3E8	Two-component response regulator	Other	0.145206	0.135955	28.6075	28.5404	0.0670802	0.286943	11	11	11	20.7	20.7	20.7	83.26	0	35.491	582700000	38	11	11	11	1	7	8	8	7	9	7	7	8	8	7	9	7	7	8	8	7	9	7	765	765	1	48	NaN	NaN	NaN	NaN
Q7V3E9	Possible Herpesvirus UL6 like	Other	0.0212786	0.0190585	26.1542	26.0219	0.132299	0.473775	9	9	9	41.1	41.1	41.1	24.223	0	21.439	794110000	39	9	9	9	1	7	8	6	8	8	6	7	8	6	8	8	6	7	8	6	8	8	6	214	214	1	53	NaN	NaN	NaN	NaN
Q7V3F0	Possible ABC transporter, ATP-binding component	Membrane Transport	0.00954434	0.00999344	24.5323	24.6295	-0.0972404	0.555261	12	12	12	58.2	58.2	58.2	28.628	0	185.1	10304000000	146	12	12	12	1	12	12	12	12	12	12	12	12	12	12	12	12	12	12	12	12	12	12	251	251	1	149	NaN	NaN	NaN	NaN
Q7V3F1	UPF0367 protein PMM0124	Other	0.166459	0.185216	27.3017	27.4906	-0.188897	0.449032	24	24	24	58.8	58.8	58.8	36.881	0	65.87	3300500000	143	24	24	24	1	20	19	22	23	22	21	20	19	22	23	22	21	20	19	22	23	22	21	313	313	1	157	NaN	NaN	NaN	NaN
Q7V3F2	Cysteine synthase	Central Metabolism	0.0253821	0.0247907	26.4476	26.4447	0.00293795	0.995139	9	9	9	45.8	45.8	45.8	25.292	0	23.129	511660000	42	9	9	9	1	8	7	7	6	7	6	8	7	7	6	7	6	8	7	7	6	7	6	227	227	1	49	NaN	NaN	NaN	NaN
Q7V3F5	Putative cell division inhibitor	Basic Cellular Processes	0.00567234	0.00502794	24.2336	24.0881	0.145526	0.218983	10	10	10	91	91	91	10.146	0	36.708	5969000000	99	10	10	10	1	9	10	10	9	10	9	9	10	10	9	10	9	9	10	10	9	10	9	89	89	1	105	NaN	NaN	NaN	NaN
Q7V3F8	Uncharacterized protein	Uncharacterized	0.0153501	0.0167898	24.5403	24.6962	-0.155977	0.607125	18	18	18	78	78	78	34.719	0	179.65	4370500000	162	18	18	18	1	17	16	15	15	16	16	17	16	15	15	16	16	17	16	15	15	16	16	322	322	1	173	NaN	NaN	NaN	NaN
Q7V3F9	Uncharacterized protein	Uncharacterized	0.0119995	0.0314325	23.6847	25.4752	-1.79044	0.339271	12	12	12	42.3	42.3	42.3	34.62	0	29.823	1019000000	64	12	12	12	1	10	9	11	11	10	10	10	9	11	11	10	10	10	9	11	11	10	10	310	310	1	93	NaN	NaN	NaN	NaN
Q7V3G0	Zeta-carotene desaturase	Central Metabolism	0.0255429	0.0230761	27.048	26.9294	0.118624	0.157714	3	3	3	24.6	24.6	24.6	16.412	0	23.237	277180000	19	3	3	3	1	3	3	3	3	3	3	3	3	3	3	3	3	3	3	3	3	3	3	142	142	1	21	NaN	NaN	NaN	NaN
Q7V3G1	Uncharacterized protein	Uncharacterized	0.035123	0.0369448	25.871	25.9733	-0.102235	0.61504	3	3	3	21.5	21.5	21.5	14.103	0	33.908	356210000	12	3	3	3	1	2	2	2	3	2	2	2	2	2	3	2	2	2	2	2	3	2	2	130	130	1	13	NaN	NaN	NaN	NaN
Q7V3G2	Putative uroporphyrinogen III synthase	Central Metabolism	0.00769675	0.00644906	24.4573	24.2419	0.215431	0.473556	27	27	27	62.6	62.6	62.6	54.208	0	138.78	6560800000	198	27	27	27	1	25	24	24	24	25	24	25	24	24	24	25	24	25	24	24	24	25	24	484	484	1	213	NaN	NaN	NaN	NaN
Q7V3G3	Ribosome-binding factor A	Basic Cellular Processes	0.0117303	0.0122945	24.0455	24.1392	-0.093668	0.789205	5	5	5	39.1	39.1	39.1	18.093	0	24.424	851060000	26	5	5	5	1	3	4	5	4	5	5	3	4	5	4	5	5	3	4	5	4	5	5	156	156	1	28	NaN	NaN	NaN	NaN
Q7V3G5	Putative glutathione S-transferase	Basic Cellular Processes	0.113216	0.111676	28.1896	28.1985	-0.00893339	0.920837	10	10	10	40.5	40.5	40.5	30.108	0	18.025	539630000	29	10	10	10	1	8	8	6	7	7	6	8	8	6	7	7	6	8	8	6	7	7	6	269	269	1	43	NaN	NaN	NaN	NaN
Q7V3G8	Shikimate kinase	Central Metabolism	0.135684	0.134451	28.0675	28.0835	-0.0159645	0.94551	4	4	4	40.9	40.9	40.9	15.272	0	25.567	297250000	25	4	4	4	1	4	4	3	2	4	3	4	4	3	2	4	3	4	4	3	2	4	3	132	132	1	26	NaN	NaN	NaN	NaN
Q7V3G9	6-pyruvoyl tetrahydropterin synthase	Central Metabolism	0.00733967	0.00696161	24.5657	24.5454	0.0202535	0.983289	18	18	18	73	73	73	27.229	0	92.244	7675500000	103	18	18	18	1	15	15	15	15	15	14	15	15	15	15	15	14	15	15	15	15	15	14	241	241	1	117	NaN	NaN	NaN	NaN
Q7V3H1	Uncharacterized protein	Uncharacterized	0.00897704	0.00844306	25.1988	25.1256	0.0732511	0.921185	13	13	13	68.1	68.1	68.1	21.233	0	78.934	4931200000	79	13	13	13	1	12	13	11	12	13	13	12	13	11	12	13	13	12	13	11	12	13	13	185	185	1	109	NaN	NaN	NaN	NaN
Q7V3H2	Uncharacterized protein	Uncharacterized	0.0171988	0.0183228	24.5585	24.6765	-0.118004	0.425315	9	9	9	27.6	27.6	27.6	34.704	0	31.422	862290000	54	9	9	9	1	7	8	7	6	5	7	7	8	7	6	5	7	7	8	7	6	5	7	308	308	1	50	NaN	NaN	NaN	NaN
Q7V3H4	Uncharacterized protein	Uncharacterized	0.0802881	0.0738413	28.0589	27.9645	0.0943336	0.740708	7	7	7	24	24	24	46.039	0	21.213	536010000	30	7	7	7	1	5	7	6	6	5	5	5	7	6	6	5	5	5	7	6	6	5	5	384	384	1	37	NaN	NaN	NaN	NaN
Q7V3H5	L-aspartate oxidase	Central Metabolism	0.0137152	0.012845	26.3461	26.2758	0.0703354	0.824323	12	12	12	68.8	68.8	68.8	14.992	0	43.085	1096300000	56	12	12	12	1	11	12	10	10	11	11	11	12	10	10	11	11	11	12	10	10	11	11	128	128	1	82	NaN	NaN	NaN	NaN
Q7V3H6	Uncharacterized protein	Uncharacterized	0.00507689	0.00768338	23.7704	24.3994	-0.628953	0.354502	9	9	9	31.5	31.5	31.5	34.764	0	82.561	3904300000	50	9	9	9	1	7	8	7	7	7	7	7	8	7	7	7	7	7	8	7	7	7	7	311	311	1	58	NaN	NaN	NaN	NaN
Q7V3H8	Possible RND family outer membrane efflux protein	Membrane Transport	0.0303109	0.031005	27.2704	27.3316	-0.0611579	0.21069	13	13	13	27.9	27.9	27.9	62.02	0	83.508	1469400000	70	13	13	13	1	11	10	12	8	9	12	11	10	12	8	9	12	11	10	12	8	9	12	555	555	1	83	NaN	NaN	NaN	NaN
Q7V3H9	Inositol-1-monophosphatase	Central Metabolism	0.0931486	0.0897374	28.0424	28.0198	0.0225499	0.898708	3	3	3	12.5	12.5	12.5	28.185	0	6.4165	170950000	6	3	3	3	1	2	2	3	2	2	2	2	2	3	2	2	2	2	2	3	2	2	2	255	255	1	13	NaN	NaN	NaN	NaN
Q7V3I0	Similar to serum resistance locus BrkB	Other	0.00441411	0.00409302	23.8632	23.779	0.0842196	0.663908	27	27	27	53.4	53.4	53.4	54.266	0	249.84	8841600000	213	27	27	27	1	26	23	24	24	26	24	26	23	24	24	26	24	26	23	24	24	26	24	476	476	1	224	NaN	NaN	NaN	NaN
Q7V3I1	Uncharacterized protein	Uncharacterized	0.0214881	0.0203546	24.3917	24.3333	0.0584164	0.993302	20	20	20	80.4	80.4	80.4	29.223	0	222.12	6804300000	125	20	20	20	1	17	19	18	18	17	20	17	19	18	18	17	20	17	19	18	18	17	20	265	265	1	140	NaN	NaN	NaN	NaN
Q7V3I3	Uncharacterized protein	Uncharacterized	0.151766	0.150351	27.3815	27.3994	-0.0179653	0.96618	6	6	6	16.9	16.9	16.9	34.36	0	17.909	383760000	37	6	6	6	1	6	5	5	5	5	4	6	5	5	5	5	4	6	5	5	5	5	4	308	308	1	41	NaN	NaN	NaN	NaN
Q7V3I4	Uncharacterized protein	Uncharacterized	0.040558	0.0413316	25.2321	25.2866	-0.0544408	0.926834	4	4	4	19.4	19.4	19.4	11.976	0	26.131	262610000	12	4	4	4	1	2	2	1	2	2	3	2	2	1	2	2	3	2	2	1	2	2	3	108	108	1	12	NaN	NaN	NaN	NaN
Q7V3I5	Possible serine protease	Central Metabolism	0.0491283	0.0494556	27.6499	27.6876	-0.0377	0.471371	7	7	7	82.5	82.5	82.5	11.735	0	101.85	3621000000	49	7	7	7	1	6	6	7	7	6	6	6	6	7	7	6	6	6	6	7	7	6	6	103	103	1	67	NaN	NaN	NaN	NaN
Q7V3I6	ABC transporter, ATP binding component	Membrane Transport	0.00236306	0.00310533	23.5739	24.1884	-0.614527	0.663587	6	6	6	47.1	47.1	47.1	9.9652	0	25.441	588040000	27	6	6	6	1	4	4	6	5	6	4	4	4	6	5	6	4	4	4	6	5	6	4	87	87	1	29	NaN	NaN	NaN	NaN
Q7V3J0	Putative potassium channel, VIC family	Membrane Transport	0.274831	0.291145	29.425	29.5368	-0.111788	0.475373	19	19	19	52.4	52.4	52.4	41.838	0	184.12	6662100000	160	19	19	19	1	19	19	19	19	18	19	19	19	19	19	18	19	19	19	19	19	18	19	382	382	1	156	NaN	NaN	NaN	NaN
Q7V3J1	Possible sodium transporter, Trk family	Membrane Transport	0.00406446	0.00353255	24.3303	24.1686	0.161694	0.617025	4	4	4	10.7	10.7	10.7	61.694	0	14.827	166490000	12	4	4	4	1	3	1	3	3	4	2	3	1	3	3	4	2	3	1	3	3	4	2	540	540	1	17	NaN	NaN	NaN	NaN
Q7V3J2	Putative sodium/sulfate transporter, DASS family	Membrane Transport	0.01697	0.0151381	26.769	26.6348	0.134131	0.464625	13	13	13	60.7	60.7	60.7	25.963	0	160.89	10673000000	110	13	13	13	1	11	10	12	11	12	11	11	10	12	11	12	11	11	10	12	11	12	11	234	234	1	106	NaN	NaN	NaN	NaN
Q7V3J3	Putative NADH dehydrogenase, transport associated	Membrane Transport	0.00783577	0.00768723	25.045	25.0453	-0.00036176	1	3	3	3	7.3	7.3	7.3	51.547	0	6.552	211130000	10	3	3	3	1	2	3	2	2	2	2	2	3	2	2	2	2	2	3	2	2	2	2	467	467	1	13	NaN	NaN	NaN	NaN
Q7V3J4	Phosphoadenylyl-sulfate reductase (thioredoxin)	Oxidative Stress	0.0203847	0.020321	25.71	25.7334	-0.023393	0.891557	11	11	11	17.4	17.4	17.4	65.441	0	104.39	3174700000	68	11	11	11	1	11	11	11	11	10	11	11	11	11	11	10	11	11	11	11	11	10	11	602	602	1	81	NaN	NaN	NaN	NaN
Q7V3J5	Pantothenate kinase	Central Metabolism	0.0102696	0.0103467	24.6121	24.67	-0.0579287	0.924414	12	12	12	34	34	34	44.184	0	27.846	1113300000	55	12	12	12	1	8	9	12	10	9	11	8	9	12	10	9	11	8	9	12	10	9	11	394	394	1	67	NaN	NaN	NaN	NaN
Q7V3J6	Putative bacterioferritin comigratory (BCP) protein	Membrane Transport	0.203716	0.216409	28.4	28.5158	-0.115775	0.288115	12	12	12	57.1	57.1	57.1	28.057	0	198.51	1207200000	59	12	12	12	1	7	9	10	10	10	9	7	9	10	10	10	9	7	9	10	10	10	9	240	240	1	82	NaN	NaN	NaN	NaN
Q7V3J8	Putative ATPase, AAA family	Other	0.0117861	0.0114809	25.7551	25.744	0.0110334	0.983913	4	4	4	20.8	20.8	20.8	25.243	0	10.533	238750000	15	4	4	4	1	4	2	3	3	3	2	4	2	3	3	3	2	4	2	3	3	3	2	226	226	1	17	NaN	NaN	NaN	NaN
Q7V3J9	Phosphoglucomutase	Central Metabolism	0.0588086	0.0522312	28.4221	28.2788	0.143301	0.240773	20	20	20	76.8	76.8	76.8	17.798	0	199.64	14530000000	193	20	20	20	1	19	19	20	20	19	19	19	19	20	20	19	19	19	19	20	20	19	19	155	155	1	202	NaN	NaN	NaN	NaN
Q7V3K0	Uncharacterized protein	Uncharacterized	0.0801509	0.088809	28.251	28.4786	-0.227589	0.781223	17	17	17	43.1	43.1	43.1	48.009	0	107.12	2328700000	99	17	17	17	1	15	16	16	14	16	16	15	16	16	14	16	16	15	16	16	14	16	16	429	429	1	117	NaN	NaN	NaN	NaN
Q7V3K2	ABC transporter, membrane component	Membrane Transport	0.0125718	0.0121403	26.0105	25.9878	0.022735	0.951649	24	24	24	60.7	60.7	60.7	59.718	0	323.31	20832000000	239	24	24	24	1	22	22	23	21	22	22	22	22	23	21	22	22	22	22	23	21	22	22	545	545	1	270	NaN	NaN	NaN	NaN
Q7V3K3	ABC transporter, ATP binding component	Membrane Transport	0.0332243	0.0340837	26.534	26.5998	-0.0658232	0.704646	27	27	27	85.9	85.9	85.9	41.428	0	272.95	13309000000	187	27	27	27	1	18	21	24	25	24	25	18	21	24	25	24	25	18	21	24	25	24	25	368	368	1	203	NaN	NaN	NaN	NaN
Q7V3K4	ABC transporter, membrane component	Membrane Transport	0.01929	0.0189583	26.3851	26.3888	-0.00371615	0.983575	20	20	20	44.8	44.8	44.8	53.296	0	143.93	3824800000	141	20	20	20	1	18	19	19	19	19	20	18	19	19	19	19	20	18	19	19	19	19	20	480	480	1	156	NaN	NaN	NaN	NaN
Q7V3K5	Cysteine desulfurase	Central Metabolism	0.0153801	0.0160948	26.0994	26.2218	-0.122321	0.855703	20	20	20	75.1	75.1	75.1	29.234	0	150.79	4086800000	138	20	20	20	1	16	16	18	15	18	18	16	16	18	15	18	18	16	16	18	15	18	18	261	261	1	158	NaN	NaN	NaN	NaN
Q7V3K6	Esterase/lipase/thioesterase family active site	Central Metabolism	0.00145488	0.00147831	23.3049	23.3679	-0.0629654	0.924557	23	23	23	61.7	61.7	61.7	45.919	0	169.04	3348900000	136	23	23	23	1	16	18	17	16	22	19	16	18	17	16	22	19	16	18	17	16	22	19	405	405	1	155	NaN	NaN	NaN	NaN
Q7V3K7	Peptide deformylase	Central Metabolism	0.0161627	0.0153719	25.1079	25.0746	0.0333169	0.940781	17	17	17	44.9	44.9	44.9	48.003	0	128.9	3232700000	102	17	17	17	1	13	17	16	14	15	14	13	17	16	14	15	14	13	17	16	14	15	14	425	425	1	132	NaN	NaN	NaN	NaN
Q7V3K8	HIT (Histidine triad) family protein	Basic Cellular Processes	0.0259539	0.0284871	24.9709	25.1339	-0.163047	0.372018	5	5	5	10.1	10.1	10.1	74.457	0	16.602	115670000	21	5	5	5	1	3	4	4	3	4	4	3	4	4	3	4	4	3	4	4	3	4	4	642	642	1	26	NaN	NaN	NaN	NaN
Q7V3L0	ABC transporter, ATP binding protein	Membrane Transport	0.0274079	0.0260822	27.5954	27.5536	0.0417302	0.760435	11	11	11	44.3	44.3	44.3	22.525	0	43.675	1112300000	52	11	11	11	1	11	10	10	10	10	11	11	10	10	10	10	11	11	10	10	10	10	11	201	201	1	82	NaN	NaN	NaN	NaN
Q7V3L1	Possible high light inducible protein	Other	0.0142733	0.0147838	23.5564	23.624	-0.0676924	0.85874	1	1	1	7.1	7.1	7.1	12.714	0.008843	1.8614	416140000	7	1	1	1	1	1	1	1	1	1	1	1	1	1	1	1	1	1	1	1	1	1	1	113	113	1	12	NaN	NaN	NaN	NaN
Q7V3L2	Uncharacterized protein	Uncharacterized	0.0669795	0.0650399	27.7957	27.7809	0.0148347	0.916665	27	27	27	43.8	43.8	43.8	75.217	0	217.94	10614000000	256	27	27	27	1	25	25	26	24	25	25	25	25	26	24	25	25	25	25	26	24	25	25	660	660	1	244	NaN	NaN	NaN	NaN
Q7V3L5	Acetyl-CoA carboxylase, biotin carboxylase subunit	Central Metabolism	0.0926506	0.0889553	28.7981	28.7669	0.031257	0.807433	2	2	2	44.2	44.2	44.2	9.012	0	43.23	257200000	30	2	2	2	1	2	2	2	2	2	2	2	2	2	2	2	2	2	2	2	2	2	2	77	77	1	35	NaN	NaN	NaN	NaN
Q7V3L6	Uncharacterized protein	Uncharacterized	0.0135933	0.0122605	25.9631	25.8427	0.120433	0.325048	15	15	15	34.5	34.5	34.5	35.413	0	282	10284000000	166	15	15	15	1	14	15	15	14	14	14	14	15	15	14	14	14	14	15	15	14	14	14	310	310	1	175	NaN	NaN	NaN	NaN
Q7V3L7	Uncharacterized protein	Uncharacterized	0.0471368	0.0432664	27.4117	27.3178	0.0939376	0.482805	18	18	18	55.9	55.9	55.9	49.248	0	225.9	12580000000	201	18	18	18	1	15	16	16	16	16	16	15	16	16	16	16	16	15	16	16	16	16	16	449	449	1	191	NaN	NaN	NaN	NaN
Q7V3L8	Chromosome partition protein Smc	Basic Cellular Processes	0.00443338	0.00460925	25.8205	25.9084	-0.0879701	0.725579	11	11	11	31.7	31.7	31.7	49.266	0	59.854	860400000	47	11	11	11	1	10	7	10	10	9	9	10	7	10	10	9	9	10	7	10	10	9	9	429	429	1	61	NaN	NaN	NaN	NaN
Q7V3M0	Uncharacterized protein	Uncharacterized	0.03617	0.0330928	25.8857	25.7866	0.0991186	0.633354	16	16	16	52.1	52.1	52.1	37.896	0	261.58	6443200000	148	16	16	16	1	16	15	15	16	16	16	16	15	15	16	16	16	16	15	15	16	16	16	338	338	1	155	NaN	NaN	NaN	NaN
Q7V3M1	Uncharacterized protein	Uncharacterized	0.206423	0.180423	28.1409	27.9767	0.164237	0.39416	60	60	60	57.5	57.5	57.5	136.53	0	323.31	7021500000	289	60	60	60	1	44	49	54	50	51	51	44	49	54	50	51	51	44	49	54	50	51	51	1194	1194	1	363	NaN	NaN	NaN	NaN
Q7V3M2	Putative RNA methylase family UPF0020	Basic Cellular Processes	0.00251445	0.00218561	23.3169	23.1446	0.172339	0.758703	6	6	6	49.7	49.7	49.7	16.976	0	90.711	1737900000	49	6	6	6	1	5	5	5	6	6	5	5	5	5	6	6	5	5	5	5	6	6	5	153	153	1	57	NaN	NaN	NaN	NaN
Q7V3M4	Uncharacterized protein	Uncharacterized	0.0650127	0.0630688	27.2759	27.2621	0.0137914	0.926189	4	4	4	28.9	28.9	28.9	14.021	0	20.917	3475300000	38	4	4	4	1	4	4	4	4	4	4	4	4	4	4	4	4	4	4	4	4	4	4	128	128	1	47	NaN	NaN	NaN	NaN
Q7V3M5	Arginine biosynthesis bifunctional protein ArgJ	Central Metabolism	0.0087263	0.00883652	25.2283	25.2734	-0.0451113	0.880374	7	7	7	23	23	23	43.43	0	22.303	223910000	27	7	7	7	1	6	4	7	5	5	5	6	4	7	5	5	5	6	4	7	5	5	5	374	374	1	39	NaN	NaN	NaN	NaN
Q7V3M6	Dephospho-CoA kinase	Central Metabolism	0.00946619	0.0105273	24.3694	24.5483	-0.178927	0.290472	10	10	10	49.8	49.8	49.8	23.914	0	106.55	2335700000	78	10	10	10	1	10	10	10	10	10	9	10	10	10	10	10	9	10	10	10	10	10	9	223	223	1	76	NaN	NaN	NaN	NaN
Q7V3M7	Aspartyl/glutamyl-tRNA(Asn/Gln) amidotransferase subunit B	Central Metabolism	0.0963964	0.0921824	28.9815	28.9453	0.0361309	0.562737	10	10	10	37.8	37.8	37.8	43.402	0	55.849	1097300000	56	10	10	10	1	9	8	9	7	9	10	9	8	9	7	9	10	9	8	9	7	9	10	402	402	1	62	NaN	NaN	NaN	NaN
Q7V3M8	Nucleoside diphosphate kinase	Central Metabolism	0.230586	0.228509	28.551	28.5664	-0.0153948	0.915828	9	9	9	45.1	45.1	45.1	23.788	0	34.466	617810000	50	9	9	9	1	7	9	7	8	7	8	7	9	7	8	7	8	7	9	7	8	7	8	204	204	1	52	NaN	NaN	NaN	NaN
Q7V3M9	Biosynthetic arginine decarboxylase	Central Metabolism	0.0150961	0.0145778	26.7092	26.6877	0.0215365	0.788892	40	40	40	78.8	78.8	78.8	55.202	0	290	24066000000	351	40	40	40	1	32	32	33	33	36	36	32	32	33	33	36	36	32	32	33	33	36	36	490	490	1	383	NaN	NaN	NaN	NaN
Q7V3N0	Alanine--tRNA ligase	Central Metabolism	0.00622568	0.00606414	25.8833	25.8738	0.00948334	0.950895	8	8	8	48.7	48.7	48.7	17.186	0	88.198	12571000000	123	8	8	8	1	8	8	8	8	8	8	8	8	8	8	8	8	8	8	8	8	8	8	152	152	1	126	NaN	NaN	NaN	NaN
Q7V3N1	Flavoprotein	Energy Production and Conversion	0.0184205	0.0206465	26.863	27.057	-0.194026	0.289644	30	30	30	55.6	55.6	55.6	73.424	0	313.48	6220300000	206	30	30	30	1	24	27	26	26	28	27	24	27	26	26	28	27	24	27	26	26	28	27	648	648	1	222	NaN	NaN	NaN	NaN
Q7V3N2	Flavoprotein	Energy Production and Conversion	0.0162982	0.0159361	26.7088	26.7039	0.00485675	0.990291	41	41	41	44.8	44.8	44.8	99.138	0	272.35	5424600000	268	41	41	41	1	37	37	37	34	37	37	37	37	37	34	37	37	37	37	37	34	37	37	886	886	1	290	NaN	NaN	NaN	NaN
Q7V3N3	Possible reductase	Central Metabolism	0.0602334	0.0624879	26.8082	26.8838	-0.0756009	0.823882	22	22	22	45	45	45	66.102	0	182.01	5043200000	152	22	22	22	1	19	19	19	20	19	19	19	19	19	20	19	19	19	19	19	20	19	19	591	591	1	154	NaN	NaN	NaN	NaN
Q7V3N4	Putative penicillin-binding protein	Other	0.00181013	0.00182946	23.5292	23.5603	-0.0311241	0.946398	25	25	25	45.2	45.2	45.2	67.219	0	96.926	2290200000	123	25	25	25	1	20	21	22	20	20	16	20	21	22	20	20	16	20	21	22	20	20	16	600	600	1	143	NaN	NaN	NaN	NaN
Q7V3N5	Uncharacterized protein	Uncharacterized	0.00718819	0.00870985	23.9536	24.263	-0.309369	0.194146	7	7	7	46	46	46	19.519	0	67.092	1771000000	49	7	7	7	1	7	6	6	7	7	7	7	6	6	7	7	7	7	6	6	7	7	7	174	174	1	62	NaN	NaN	NaN	NaN
Q7V3N7	GMP synthase [glutamine-hydrolyzing]	Central Metabolism	0.0621558	0.0579495	28.4558	28.3828	0.0729408	0.447962	8	8	8	14.1	14.1	14.1	66.619	0	15.259	280730000	30	8	8	8	1	7	6	7	7	5	7	7	6	7	7	5	7	7	6	7	7	5	7	596	596	1	44	NaN	NaN	NaN	NaN
Q7V3N8	Cobalt-precorrin-5B C(1)-methyltransferase	Central Metabolism	0.0137813	0.0149858	25.7757	25.9229	-0.147165	0.513471	5	5	5	23.8	23.8	23.8	23.944	0	35.766	460250000	36	5	5	5	1	4	5	5	5	5	5	4	5	5	5	5	5	4	5	5	5	5	5	202	202	1	36	NaN	NaN	NaN	NaN
Q7V3N9	Soluble hydrogenase small subunit	Central Metabolism	0.0833342	0.0719056	28.4201	28.235	0.185184	0.143286	42	42	42	76.1	76.1	76.1	59.597	0	323.31	24754000000	359	42	42	42	1	37	39	41	39	40	38	37	39	41	39	40	38	37	39	41	39	40	38	528	528	1	381	NaN	NaN	NaN	NaN
Q7V3P3	Uncharacterized protein	Uncharacterized	0.0257098	0.025928	26.3403	26.3776	-0.0373236	0.915763	10	10	10	34.4	34.4	34.4	41.281	0	38.672	1038300000	32	10	10	10	1	7	6	5	7	6	6	7	6	5	7	6	6	7	6	5	7	6	6	372	372	1	39	NaN	NaN	NaN	NaN
Q7V3P4	4-hydroxythreonine-4-phosphate dehydrogenase	Central Metabolism	0.00829849	0.0079594	24.9353	24.9092	0.0261192	0.93247	26	26	26	72.7	72.7	72.7	42.405	0	173.6	19244000000	305	26	26	26	1	24	23	25	23	24	24	24	23	25	23	24	24	24	23	25	23	24	24	384	384	1	304	NaN	NaN	NaN	NaN
Q7V3P5	Elongation factor P	Basic Cellular Processes	0.083283	0.0930278	27.3726	27.5606	-0.18794	0.148593	13	13	13	44.7	44.7	44.7	33.655	0	52.165	2266900000	58	13	13	13	1	11	10	12	11	11	12	11	10	12	11	11	12	11	10	12	11	11	12	295	295	1	80	NaN	NaN	NaN	NaN
Q7V3P6	Cyclophilin-type peptidyl-prolyl cis-trans isomerase	Central Metabolism	0.0115155	0.0121102	25.4812	25.5816	-0.100449	0.68878	11	11	11	43.4	43.4	43.4	38.188	0	29.521	608730000	42	11	11	11	1	8	9	9	8	6	7	8	9	9	8	6	7	8	9	9	8	6	7	346	346	1	54	NaN	NaN	NaN	NaN
Q7V3P8	UDP-N-acetylmuramate--L-alanine ligase	Central Metabolism	0.00764239	0.00810923	25.2571	25.3875	-0.13044	0.78516	15	15	15	64	64	64	20.616	0	52.828	3515700000	85	15	15	15	1	11	13	13	12	14	14	11	13	13	12	14	14	11	13	13	12	14	14	186	186	1	97	NaN	NaN	NaN	NaN
Q7V3Q0	Nucleoid-associated protein PMM0020	Basic Cellular Processes	0.0396627	0.0325044	25.6206	25.36	0.260576	0.290817	11	11	11	39.7	39.7	39.7	41.059	0	66.669	1336600000	62	11	11	11	1	9	9	10	9	11	9	9	9	10	9	11	9	9	9	10	9	11	9	363	363	1	65	NaN	NaN	NaN	NaN
Q7V3Q1	Small ribosomal subunit biogenesis GTPase RsgA	Basic Cellular Processes	0.00514326	0.00566748	24.0681	24.2327	-0.164585	0.475011	8	8	8	22	22	22	53.638	0	61.473	614470000	31	8	8	8	1	5	7	8	7	6	7	5	7	8	7	6	7	5	7	8	7	6	7	473	473	1	45	NaN	NaN	NaN	NaN
Q7V3Q3	Chaperone protein DnaJ	Basic Cellular Processes	0.0545503	0.0498094	27.7696	27.6671	0.102498	0.339344	8	8	8	80.2	80.2	80.2	12.948	0	96.891	1511700000	67	8	8	8	1	8	8	6	8	7	6	8	8	6	8	7	6	8	8	6	8	7	6	116	116	1	60	NaN	NaN	NaN	NaN
Q7V3Q4	Protein GrpE	Basic Cellular Processes	0.663739	0.672481	30.729	30.7744	-0.0454102	0.823229	5	5	5	20	20	20	35.272	0	19.291	406950000	27	5	5	5	1	4	4	3	2	4	3	4	4	3	2	4	3	4	4	3	2	4	3	305	305	1	38	NaN	NaN	NaN	NaN
Q7V3Q5	Uncharacterized protein	Uncharacterized	0.0182263	0.019773	24.9944	25.1445	-0.15013	0.539303	21	21	21	47.6	47.6	47.6	40.201	0	226.17	10669000000	189	21	21	21	1	20	18	19	20	21	19	20	18	19	20	21	19	20	18	19	20	21	19	374	374	1	178	NaN	NaN	NaN	NaN
Q7V3Q7	RNA-binding region RNP-1 (RNA recognition motif)	Basic Cellular Processes	0.491097	0.482437	30.1814	30.1798	0.0016435	1	20	20	20	76.6	76.6	76.6	27.671	0	323.31	32857000000	198	NaN	NaN	NaN	2	18	18	18	17	17	16	18	18	18	17	17	16	18	18	18	17	17	16	239	NaN	1	210	NaN	NaN	NaN	NaN
Q7V3Q8	Protein phosphatase 2C domain	Central Metabolism	0.00239548	0.00189277	23.5125	23.1679	0.344536	0.550563	6	6	6	30.5	30.5	30.5	18.743	0	16.232	751570000	18	6	6	6	1	4	5	5	5	6	5	4	5	5	5	6	5	4	5	5	5	6	5	164	164	1	30	NaN	NaN	NaN	NaN
Q7V3Q9	Signal recognition particle receptor FtsY	Membrane Transport	0.0317958	0.0317854	27.2261	27.2537	-0.0276744	0.786958	9	9	9	51.6	51.6	51.6	22.732	0	171.34	25702000000	161	9	9	9	1	9	7	9	9	9	9	9	7	9	9	9	9	9	7	9	9	9	9	221	221	1	148	NaN	NaN	NaN	NaN
Q7V3R0	N utilization substance protein B homolog	Inorganic Nutrient Processing	0.0349924	0.0376908	26.2861	26.4259	-0.139771	0.503469	5	5	5	10.5	10.5	10.5	51.83	0.0015232	2.7721	165280000	9	5	5	5	1	4	4	4	4	2	4	4	4	4	4	2	4	4	4	4	4	2	4	447	447	1	22	NaN	NaN	NaN	NaN
Q7V3R1	Uncharacterized protein	Uncharacterized	0.115607	0.113091	28.2439	28.239	0.00495529	0.979703	34	34	34	80.7	80.7	80.7	48.441	0	323.31	13883000000	265	34	34	34	1	34	32	33	31	30	30	34	32	33	31	30	30	34	32	33	31	30	30	440	440	1	272	NaN	NaN	NaN	NaN
Q7V3R3	Uncharacterized protein	Uncharacterized	0.0021495	0.00207364	22.7065	22.6827	0.0238902	0.927848	9	9	9	36.8	36.8	36.8	24.04	0	41.017	1980600000	55	9	9	9	1	8	9	8	8	8	8	8	9	8	8	8	8	8	9	8	8	8	8	209	209	1	80	NaN	NaN	NaN	NaN
Q7V3R4	DNA topoisomerase (ATP-hydrolyzing)	Basic Cellular Processes	0.0203712	0.0196901	27.4692	27.4474	0.02174	0.892647	12	12	12	56.7	56.7	56.7	26.752	0	200.7	8428800000	75	12	12	12	1	11	12	11	11	11	11	11	12	11	11	11	11	11	12	11	11	11	11	245	245	1	96	NaN	NaN	NaN	NaN
Q7V3R5	Phosphoribosylformylglycinamidine synthase subunit PurL	Central Metabolism	0.023291	0.0207948	27.6002	27.4653	0.134884	0.257504	6	6	6	13	13	13	32.638	0	5.2157	130130000	14	6	6	6	1	4	4	4	4	4	4	4	4	4	4	4	4	4	4	4	4	4	4	284	284	1	25	NaN	NaN	NaN	NaN
Q7V3R6	Uncharacterized protein	Uncharacterized	0.0210566	0.0217832	25.7231	25.7904	-0.0673606	0.897973	43	43	43	53.5	53.5	53.5	93.038	0	288.6	7771600000	293	43	43	43	1	38	37	35	38	36	37	38	37	35	38	36	37	38	37	35	38	36	37	813	813	1	341	NaN	NaN	NaN	NaN
Q7V3R7	DNA polymerase III subunit beta	Basic Cellular Processes	0.210419	0.182687	29.7566	29.584	0.172611	0.290827	45	45	45	57.5	57.5	57.5	85.196	0	323.31	17660000000	399	45	45	45	1	39	40	40	39	39	41	39	40	40	39	39	41	39	40	40	39	39	41	779	779	1	381	NaN	NaN	NaN	NaN
Q8GBX9	Putative neutral invertase-like protein	Other	0.0196319	0.0188686	26.6494	26.6201	0.0292301	0.824117	4	4	4	25.1	25.1	25.1	27.418	0	20.012	419020000	10	4	4	4	1	3	3	3	2	2	2	3	3	3	2	2	2	3	3	3	2	2	2	235	235	1	15	NaN	NaN	NaN	NaN
Q93P09	Photosystem II CP43 reaction center protein	Photosynthesis	0.202681	0.201801	29.9585	29.9844	-0.0258764	0.946863	28	28	28	80	80	80	42.505	0	323.31	36030000000	319	28	28	28	1	26	26	27	23	27	24	26	26	27	23	27	24	26	26	27	23	27	24	385	385	1	346	NaN	NaN	NaN	NaN
Q93P10	Photosystem II D2 protein	Photosynthesis	0.233064	0.212614	29.7936	29.6959	0.0977147	0.809471	16	16	16	38.1	38.1	38.1	55.979	0	159.6	3576500000	108	16	16	16	1	14	15	13	12	12	12	14	15	13	12	12	12	14	15	13	12	12	12	478	478	1	99	NaN	NaN	NaN	NaN
Q93SN7	Phycoerythrobilin:ferredoxin oxidoreductase	Photosynthesis	0.00862257	0.00926849	24.3329	24.3633	-0.0304146	1	17	17	17	38	38	38	50.454	0	323.31	40568000000	307	17	17	17	1	15	17	17	17	17	17	15	17	17	17	17	17	15	17	17	17	17	17	460	460	1	323	NaN	NaN	NaN	NaN
Q93SN8	15,16-dihydrobiliverdin:ferredoxin oxidoreductase	Photosynthesis	0.0326024	0.0335304	26.3632	26.4297	-0.0665455	0.757798	10	10	10	32.1	32.1	32.1	39.943	0	132.63	21881000000	184	10	10	10	1	10	10	10	10	9	10	10	10	10	10	9	10	10	10	10	10	9	10	358	358	1	157	NaN	NaN	NaN	NaN
Q93TL5	Phycocyanobilin:ferredoxin oxidoreductase	Photosynthesis	0.00502294	0.00437563	23.6721	23.3008	0.371277	0.845616	3	3	3	12.8	12.8	12.8	29.872	0	8.1101	262030000	13	3	3	3	1	3	3	1	1	2	2	3	3	1	1	2	2	3	3	1	1	2	2	257	257	1	12	NaN	NaN	NaN	NaN
Q9RC07	Photosystem I P700 chlorophyll a apoprotein A2	Photosynthesis	0.170358	0.147237	30.3981	30.2184	0.179743	0.394811	8	8	8	49.2	49.2	49.2	28.34	0	30.449	1009500000	40	8	8	8	1	7	7	7	5	5	6	7	7	7	5	5	6	7	7	7	5	5	6	236	236	1	48	NaN	NaN	NaN	NaN
Q9RC08	Photosystem I P700 chlorophyll a apoprotein A1	Photosynthesis	0.101194	0.095412	29.6957	29.6414	0.0542583	0.743229	5	5	5	21.2	21.2	21.2	28.076	0	36.166	148910000	18	5	5	5	1	2	4	3	3	3	3	2	4	3	3	3	3	2	4	3	3	3	3	241	241	1	19	NaN	NaN	NaN	NaN
									17	17	17	23.9	23.9	23.9	82.742	0	187.04	38001000000	216	17	17	17	1	16	17	17	16	17	17	16	17	17	16	17	17	16	17	17	16	17	17	742	742	1	213	NaN	NaN	NaN	NaN
									25	25	25	27.6	27.6	27.6	84.254	0	140.11	32041000000	235	25	25	25	1	24	23	24	24	24	23	24	23	24	24	24	23	24	23	24	24	24	23	767	767	1	247	NaN	NaN	NaN	NaN
[truncated: 35 more columns]
