# Supplementary material for: Environmentally relevant concentrations of titanium dioxide nanoparticles pose negligible risk to marine microbes
Source: Environ Sci Nano. 2021 Apr 9;8(5):1236–55. doi: 10.1039/d0en00883d (PMC8136324; doi:10.1039/d0en00883d)
Supplement: EN-008-D0EN00883D-s004 [file EN-008-D0EN00883D-s004.xlsx]

## Sheet: Protein Table
Extracellular Proteome
			Relative abundance (%) n=3		Protein LFQ Intensity n=3
Protein IDs	FASTA Annotation	Biological Function	Control	nTiO2	Control	nTiO2	Fold Change (-log2FC)	q-value	Peptides	Razor + unique peptides	Unique peptides	Sequence coverage [%]	Unique + razor sequence coverage [%]	Unique sequence coverage [%]	Mol. weight [kDa]	Q-value	Score	Intensity	MS/MS count	Peptide counts (all)	Peptide counts (razor+unique)	Peptide counts (unique)	Number of proteins	Peptides C1	Peptides C2	Peptides C3	Peptides T1	Peptides T2	Peptides T3	Razor + unique peptides C1	Razor + unique peptides C2	Razor + unique peptides C3	Razor + unique peptides T1	Razor + unique peptides T2	Razor + unique peptides T3	Unique peptides C1	Unique peptides C2	Unique peptides C3	Unique peptides T1	Unique peptides T2	Unique peptides T3	Sequence length	Sequence lengths	Fraction average	Fraction 1	Identification type C1	Identification type C2	Identification type C3	Identification type T1
A8WI54	Type III restriction system endonuclease	Basic Cellular Processes	0.00274051	0.00199038	21.6543	21.7594	-0.105033	0.959857	N	N	N	N	N	N	N	N	N	N	N	N	N	N	N	N	N	N	N	N	N	N	N	N	N	N	N	N	N	N	N	N	N	N	N	N	N	N	N	N	N
A8WI63	Uncharacterized protein	Uncharacterized	0.0285461	0.0461602	22.9225	23.2997	-0.377169	0.486851
A8WI64	Uncharacterized protein	Uncharacterized	0.0380788	0.0241524	23.3821	22.4412	0.940852	0.348	5	5	5	13.3	13.3	13.3	57.072	0	8.2786	51477000	10	5	5	5	1	5	1	1	3	2	3	5	1	1	3	2	3	5	1	1	3	2	3	496	496	1	15	NaN	NaN	NaN	NaN
A8WI96	Uncharacterized protein	Uncharacterized	0.0308006	0.0137656	22.4101	20.7787	1.6314	0.288235	3	3	3	49.2	49.2	49.2	7.6045	0	18.792	125410000	14	3	3	3	1	3	2	2	3	2	3	3	2	2	3	2	3	3	2	2	3	2	3	65	65	1	29	NaN	NaN	NaN	NaN
A8WIN4	Uncharacterized protein	Uncharacterized	0.00443179	0.00314625	21.7236	20.9627	0	1	2	2	2	32.8	32.8	32.8	7.7887	0.0039788	2.9333	48851000	8	2	2	2	1	2	2	2	1	2	2	2	2	2	1	2	2	2	2	2	1	2	2	67	67	1	11	NaN	NaN	NaN	NaN
P0A3A2	Chromosomal replication initiator protein DnaA	Basic Cellular Processes	0.00128524	0.00188872	21.2496	21.5341	0	1	2	2	2	44.2	44.2	44.2	4.8428	0	4.1244	19497000	8	2	2	2	1	1	2	2	2	2	1	1	2	2	2	2	1	1	2	2	2	2	1	43	43	1	10	NaN	NaN	NaN	NaN
P59830	Probable aspartoacylase	Central Metabolism	0.014036	0.0267011	23.8516	24.7523	-0.900677	0.271699	3	3	3	20.6	20.6	20.6	22.387	0.0013495	3.3409	34447000	3	3	3	3	1	0	0	0	0	2	2	0	0	0	0	2	2	0	0	0	0	2	2	189	189	1	4	NaN	NaN	NaN	NaN
Q7TU15	Threonine synthase	Central Metabolism	0.00462955	0.00520849	22.7251	22.7081	0.0169729	0.978161	5	5	5	16.2	16.2	16.2	51.989	0	13.712	13016000	5	5	5	5	1	3	1	1	1	1	1	3	1	1	1	1	1	3	1	1	1	1	1	463	463	1	8	NaN	NaN	NaN	NaN
Q7TU17	Polyphosphate kinase	Inorganic Nutrient Processing	0.00179219	0.00252858	22.1917	22.5694	-0.377644	0.517145	11	11	11	46.4	46.4	46.4	34.033	0	54.131	648430000	63	11	11	11	1	9	11	7	11	11	11	9	11	7	11	11	11	9	11	7	11	11	11	295	295	1	68	NaN	NaN	NaN	NaN
Q7TU18	Aminomethyltransferase	Central Metabolism	0.014971	0.0356268	23.8045	25.5018	-1.6973	0.31969	5	5	5	18.8	18.8	18.8	40.088	0	17.394	73139000	17	5	5	5	1	4	3	2	2	5	3	4	3	2	2	5	3	4	3	2	2	5	3	367	367	1	19	NaN	NaN	NaN	NaN
Q7TU20	Glycine cleavage system H protein	Central Metabolism	0.094139	0.0733986	25.6161	25.0185	0.597614	0.321747	13	13	13	22.2	22.2	22.2	81.043	0	38.221	113160000	27	13	13	13	1	4	10	1	7	8	9	4	10	1	7	8	9	4	10	1	7	8	9	695	695	1	42	NaN	NaN	NaN	NaN
Q7TU21	Aspartate-semialdehyde dehydrogenase	Central Metabolism	0.0406674	0.0794198	25.47	26.5416	-1.07165	0.309365	18	18	18	44.1	44.1	44.1	41.903	0	103.17	997880000	65	18	18	18	1	12	16	4	15	17	18	12	16	4	15	17	18	12	16	4	15	17	18	370	370	1	90	NaN	NaN	NaN	NaN
Q7TU22	Putative Precorrin-8X methylmutase CobH	Central Metabolism	0.00762233	0.010883	22.68	22.9543	-0.274341	0.597	6	6	6	47.3	47.3	47.3	14.508	0	124.76	1064000000	51	6	6	6	1	6	6	6	6	5	5	6	6	6	6	5	5	6	6	6	6	5	5	129	129	1	65	NaN	NaN	NaN	NaN
Q7TU24	Translation initiation factor IF-3	Basic Cellular Processes	0.00639858	0.00290303	21.5888	20.9062	0.682587	0.642654	21	21	21	58.3	58.3	58.3	37.945	0	143.05	1644300000	102	21	21	21	1	13	18	6	20	20	20	13	18	6	20	20	20	13	18	6	20	20	20	343	343	1	113	NaN	NaN	NaN	NaN
Q7TU27	30S ribosomal protein S19	Basic Cellular Processes	0.0564736	0.0469785	24.3816	23.8718	0.509773	0.332432	2	2	2	15	15	15	22.569	0	5.7721	78285000	9	2	2	2	1	2	2	1	2	2	2	2	2	1	2	2	2	2	2	1	2	2	2	207	207	1	14	NaN	NaN	NaN	NaN
Q7TU28	30S ribosomal protein S17	Basic Cellular Processes	0.0423135	0.0355966	23.9011	23.4294	0.471697	0.332103	6	6	6	34.7	34.7	34.7	22.325	0	16.92	46703000	10	6	6	6	1	6	3	1	1	2	4	6	3	1	1	2	4	6	3	1	1	2	4	190	190	1	21	NaN	NaN	NaN	NaN
Q7TU29	50S ribosomal protein L14	Basic Cellular Processes	0.199192	0.112154	26.5748	25.5396	1.03521	0.255264	5	5	5	49.5	49.5	49.5	10.192	0	16.086	181660000	26	5	5	5	1	4	5	4	3	4	4	4	5	4	3	4	4	4	5	4	3	4	4	91	91	1	25	NaN	NaN	NaN	NaN
Q7TU35	Prephenate dehydratase	Central Metabolism	0.022175	0.049132	24.3457	25.5693	-1.22363	0.267696	6	6	6	59.1	59.1	59.1	10.164	0	17.602	145740000	20	6	6	6	1	6	4	2	3	5	5	6	4	2	3	5	5	6	4	2	3	5	5	88	88	1	30	NaN	NaN	NaN	NaN
Q7TU36	S1 RNA binding domain:Ribonuclease E and G	Basic Cellular Processes	0.00105559	0.00108949	21.3153	21.1682	0	1	9	9	9	66.9	66.9	66.9	13.413	0	82.673	1782600000	90	9	9	9	1	9	8	9	7	8	8	9	8	9	7	8	8	9	8	9	7	8	8	121	121	1	97	NaN	NaN	NaN	NaN
Q7TU38	30S ribosomal protein S20	Basic Cellular Processes	0.00852548	0.00771771	21.5655	21.3461	0	1	9	9	9	46.3	46.3	46.3	30.767	0	29.2	672120000	31	9	9	9	1	6	7	3	8	7	7	6	7	3	8	7	7	6	7	3	8	7	7	281	281	1	43	NaN	NaN	NaN	NaN
Q7TU39	ATP-dependent dethiobiotin synthetase BioD	Central Metabolism	0.00618243	0.0122237	21.9967	23.2075	-1.21076	0.307589	3	3	3	7.8	7.8	7.8	68.412	0	7.8228	17335000	3	3	3	3	1	3	1	1	1	1	1	3	1	1	1	1	1	3	1	1	1	1	1	605	605	1	8	NaN	NaN	NaN	NaN
Q7TU40	Adenylosuccinate lyase	Central Metabolism	0.0204404	0.045713	24.6757	26.0743	-1.39862	0.293389	1	1	1	9.3	9.3	9.3	11.004	0.0088496	2.2954	37667000	4	1	1	1	1	1	1	1	1	1	1	1	1	1	1	1	1	1	1	1	1	1	1	97	97	1	6	NaN	NaN	NaN	NaN
Q7TU42	ATP synthase epsilon chain	Membrane Transport	0.00367199	0.00292938	20.9429	20.4172	0	1	4	4	4	31.4	31.4	31.4	24.829	0	16.628	76586000	13	4	4	4	1	2	4	0	4	3	2	2	4	0	4	3	2	2	4	0	4	3	2	220	220	1	15	NaN	NaN	NaN	NaN
Q7TU43	10 kDa chaperonin	Basic Cellular Processes	0.571809	0.427958	27.8975	27.243	0.654589	0.25876	26	26	26	60.6	60.6	60.6	48.974	0	165.2	3128200000	160	26	26	26	1	19	22	6	23	25	26	19	22	6	23	25	26	19	22	6	23	25	26	431	431	1	185	NaN	NaN	NaN	NaN
Q7TU44	60 kDa chaperonin 2	Basic Cellular Processes	0.616622	1.59609	29.7031	31.5374	-1.83428	0.277373	1	1	1	8.2	8.2	8.2	14.373	0.0013569	3.3886	10271000	2	1	1	1	1	0	0	0	1	0	1	0	0	0	1	0	1	0	0	0	1	0	1	134	134	1	2	NaN	NaN	NaN	NaN
Q7TU49	Possible Rubredoxin	Energy Production and Conversion	0.177824	0.159803	26.2448	25.8567	0.388142	0.414806	11	11	11	99	99	99	10.789	0	134.63	6446800000	94	11	11	11	1	10	9	9	8	9	8	10	9	9	8	9	8	10	9	9	8	9	8	103	103	1	95	NaN	NaN	NaN	NaN
Q7TU50	Possible Hemagglutinin-neuraminidase	Other	0.00599672	0.0050129	21.6883	21.5204	0.16793	0.888141	79	79	78	97.6	97.6	97.6	57.44	0	323.31	253470000000	1724	79	79	78	1	61	71	54	76	74	78	61	71	54	76	74	78	60	70	53	75	73	77	544	544	1	1444	NaN	NaN	NaN	NaN
Q7TU52	Possible Heat-labile enterotoxin alpha chain	Other	0.0141706	0.00462686	22.365	20.6143	1.75075	0.323143	9	9	9	73.6	73.6	73.6	12.014	0	46.45	1441600000	82	9	9	9	1	6	8	8	9	8	8	6	8	8	9	8	8	6	8	8	9	8	8	106	106	1	84	NaN	NaN	NaN	NaN
Q7TU53	Possible Helix-turn-helix protein, copG family	Basic Cellular Processes	0.00872363	0.00853728	21.3529	21.0531	0	1	2	2	2	11	11	11	19.851	0	4.0696	20028000	5	2	2	2	1	2	2	1	0	1	2	2	2	1	0	1	2	2	2	1	0	1	2	172	172	1	8	NaN	NaN	NaN	NaN
Q7TU56	Ribosomal protein L11 methyltransferase	Basic Cellular Processes	0.00323388	0.00312148	21.9691	21.6407	0.328412	0.443163	3	3	3	24.7	24.7	24.7	11.084	0	12.682	27876000	8	3	3	3	1	3	1	3	0	1	1	3	1	3	0	1	1	3	1	3	0	1	1	97	97	1	12	NaN	NaN	NaN	NaN
Q7TU57	Possible sporulation protein SpoIID	Basic Cellular Processes	0.00259621	0.00166439	22.0634	21.1704	0.89305	0.300182	2	2	2	33.8	33.8	33.8	8.7349	0	11.622	5734300	4	2	2	2	1	1	1	1	0	0	1	1	1	1	0	0	1	1	1	1	0	0	1	74	74	1	4	NaN	NaN	NaN	NaN
Q7TU60	3-methyl-2-oxobutanoate hydroxymethyltransferase	Central Metabolism	0.00870139	0.00594677	22.4203	22.0674	0.352893	0.872494	2	2	2	11.7	11.7	11.7	34.307	0	9.8381	27349000	5	2	2	2	1	1	2	0	1	2	2	1	2	0	1	2	2	1	2	0	1	2	2	300	300	1	8	NaN	NaN	NaN	NaN
Q7TU61	Cell division protein FtsZ	Basic Cellular Processes	0.00514328	0.00218231	22.7402	21.4321	1.30815	0.334797	5	5	5	12.8	12.8	12.8	45.237	0	12.281	44308000	17	5	5	5	1	5	4	4	4	3	4	5	4	4	4	3	4	5	4	4	4	3	4	397	397	1	25	NaN	NaN	NaN	NaN
Q7TU64	Indole-3-glycerol phosphate synthase	Central Metabolism	0.0042531	0.00201673	22.2216	21.007	1.21459	0.328606	5	5	5	23.7	23.7	23.7	28.262	0	34.5	105150000	12	5	5	5	1	4	3	2	3	4	3	4	3	2	3	4	3	4	3	2	3	4	3	257	257	1	25	NaN	NaN	NaN	NaN
Q7TU65	30S ribosomal protein S16	Basic Cellular Processes	0.121582	0.0909365	25.7988	25.137	0.661739	0.320036	4	4	4	19.4	19.4	19.4	39.151	0	26.332	53354000	11	4	4	4	1	4	2	3	4	1	2	4	2	3	4	1	2	4	2	3	4	1	2	371	371	1	16	NaN	NaN	NaN	NaN
Q7TU66	Riboflavin biosynthesis protein RibD	Central Metabolism	0.00772994	0.0129214	22.8703	23.9814	-1.11112	0.459506	7	7	7	26.4	26.4	26.4	33.572	0	17.58	33977000	8	7	7	7	1	7	0	3	1	1	1	7	0	3	1	1	1	7	0	3	1	1	1	295	295	1	13	NaN	NaN	NaN	NaN
Q7TU69	Possible Trehalase	Central Metabolism	0.00336051	0.00544937	20.699	21.6713	0	1	9	9	9	50.9	50.9	50.9	12.869	0	44.066	644030000	49	9	9	9	1	9	8	9	9	9	8	9	8	9	9	9	8	9	8	9	9	9	8	114	114	1	61	NaN	NaN	NaN	NaN
Q7TU79	Possible Villin headpiece domain	Other	0.232166	0.132299	27.0351	26.0533	0.981742	0.280629	12	12	12	32.3	32.3	32.3	40.144	0	36.557	280230000	39	12	12	12	1	7	10	0	9	10	9	7	10	0	9	10	9	7	10	0	9	10	9	362	362	1	49	NaN	NaN	NaN	NaN
Q7TU80	Putative Cobyrinic acid a,c-diamide synthase	Central Metabolism	0.00119391	0.00138416	21.1099	21.1335	0	1	1	1	1	11.2	11.2	11.2	20.34	0	42.718	52026000	6	1	1	1	1	1	1	1	1	1	1	1	1	1	1	1	1	1	1	1	1	1	1	170	170	1	6	NaN	NaN	NaN	NaN
Q7TU81	Bifunctional protein FolD	Central Metabolism	0.0255205	0.0471059	24.3846	25.5895	-1.20486	0.415079	7	7	7	52.7	52.7	52.7	16.754	0	47.171	1033800000	44	7	7	7	1	5	5	7	6	5	5	5	5	7	6	5	5	5	5	7	6	5	5	146	146	1	44	NaN	NaN	NaN	NaN
Q7TU82	Mg-protoporphyrin IX chelatase	Photosynthesis	0.0706255	0.159936	26.288	27.6368	-1.34876	0.283075	2	2	2	5.2	5.2	5.2	52.533	0.008794	2.2137	14338000	1	2	2	2	1	0	1	0	1	2	2	0	1	0	1	2	2	0	1	0	1	2	2	464	464	1	6	NaN	NaN	NaN	NaN
Q7TU90	Anthranilate phosphoribosyltransferase	Central Metabolism	0.0574161	0.140884	25.4311	27.371	-1.93984	0.321735	15	15	15	48.7	48.7	48.7	32.784	0	84.758	1127300000	72	15	15	15	1	12	15	4	15	15	15	12	15	4	15	15	15	12	15	4	15	15	15	298	298	1	87	NaN	NaN	NaN	NaN
Q7TU92	30S ribosomal protein S15	Basic Cellular Processes	0.0286777	0.0325908	23.3826	23.3006	0.0820573	0.84069	32	32	32	71.3	71.3	71.3	40.315	0	239.11	7329600000	252	32	32	32	1	28	29	14	31	31	32	28	29	14	31	31	32	28	29	14	31	31	32	362	362	1	264	NaN	NaN	NaN	NaN
Q7TU93	Possible Serine hydroxymethyltransferase	Central Metabolism	0.00308423	0.00754205	20.864	21.8055	0	1	13	13	13	52.5	52.5	52.5	37.04	0	203.49	2886900000	107	13	13	13	1	9	12	5	12	12	13	9	12	5	12	12	13	9	12	5	12	12	13	343	343	1	116	NaN	NaN	NaN	NaN
Q7TU94	Photosystem II reaction center Psb28 protein	Photosynthesis	0.325418	0.182679	27.2434	26.197	1.04634	0.291391	4	4	4	42.7	42.7	42.7	10.072	0	18.71	162030000	21	4	4	4	1	3	4	2	4	3	4	3	4	2	4	3	4	3	4	2	4	3	4	89	89	1	32	NaN	NaN	NaN	NaN
Q7TU96	ATP phosphoribosyltransferase regulatory subunit	Central Metabolism	0.0138855	0.0226077	24.1552	24.8697	-0.714463	0.420103	3	3	3	15.2	15.2	15.2	17.504	0	14.685	18817000	2	3	3	3	1	2	1	2	1	1	1	2	1	2	1	1	1	2	1	2	1	1	1	151	151	1	8	NaN	NaN	NaN	NaN
Q7TU97	Branched-chain-amino-acid aminotransferase	Central Metabolism	0.452029	0.438328	29.1329	28.8347	0.298253	0.412707	7	7	7	79.5	79.5	79.5	13.186	0	40.972	1602200000	62	7	7	7	1	7	6	7	6	7	6	7	6	7	6	7	6	7	6	7	6	7	6	117	117	1	71	NaN	NaN	NaN	NaN
Q7TU99	50S ribosomal protein L33	Basic Cellular Processes	0.0132498	0.0151984	21.6777	21.7094	-0.0316925	0.965631	15	15	15	34.2	34.2	34.2	44.195	0	56.642	946560000	73	15	15	15	1	14	15	8	14	14	15	14	15	8	14	14	15	14	15	8	14	14	15	383	383	1	95	NaN	NaN	NaN	NaN
Q7TUA3	Methionyl-tRNA formyltransferase	Basic Cellular Processes	0.0018974	0.00181907	21.2909	20.772	0	1	22	22	22	75.7	75.7	75.7	34.08	0	271.84	21569000000	278	22	22	22	1	21	21	20	22	20	20	21	21	20	22	20	20	21	21	20	22	20	20	304	304	1	274	NaN	NaN	NaN	NaN
Q7TUA7	1-(5-phosphoribosyl)-5-[(5-phosphoribosylamino)methylideneamino] imidazole-4-carboxamide isomerase	Central Metabolism	0.00258598	0.00239404	21.4225	21.0307	0	1	4	4	4	43.8	43.8	43.8	7.4735	0	9.3154	52538000	14	4	4	4	1	4	3	1	3	4	4	4	3	1	3	4	4	4	3	1	3	4	4	64	64	1	20	NaN	NaN	NaN	NaN
Q7TUA9	Elongation factor Ts	Basic Cellular Processes	0.0820142	0.0362276	25.8956	24.6925	1.20307	0.327299	1	1	1	3.4	3.4	3.4	37.566	0.0064683	2.6874	0	1	1	1	1	1	0	0	0	1	0	0	0	0	0	1	0	0	0	0	0	1	0	0	328	328	1	1	NaN	NaN	NaN	NaN
Q7TUB2	Possible Major surface glycoprotein	Basic Cellular Processes	0.0113009	0.0060091	22.0869	20.7721	1.31477	0.309631	4	4	4	20.4	20.4	20.4	28.163	0	18.513	25328000	5	4	4	4	1	4	0	1	0	0	0	4	0	1	0	0	0	4	0	1	0	0	0	255	255	1	5	NaN	NaN	NaN	NaN
Q7TUB9	Possible Elongation factor Tu domain 2	Basic Cellular Processes	0.228937	0.441952	26.5041	27.3161	-0.812005	0.337429	11	11	11	59.6	59.6	59.6	24.045	0	100.5	770640000	42	11	11	11	1	11	7	8	5	7	9	11	7	8	5	7	9	11	7	8	5	7	9	218	218	1	62	NaN	NaN	NaN	NaN
Q7TUC2	LACTOYLGLUTATHIONE LYASE	Central Metabolism	0.00749676	0.00623155	21.8196	21.2628	0.556784	0.565274	2	2	2	24.2	24.2	24.2	10.805	0.0013966	3.9463	11354000	3	2	2	2	1	2	0	2	0	1	0	2	0	2	0	1	0	2	0	2	0	1	0	95	95	1	5	NaN	NaN	NaN	NaN
Q7TUC3	Putative O-Acetyl homoserine sulfhydrylase	Central Metabolism	0.665066	0.812107	30.1909	30.2619	-0.0709934	0.826241	8	8	8	55.2	55.2	55.2	11.966	0	87.16	3404100000	93	8	8	8	1	8	7	7	7	8	7	8	7	7	7	8	7	8	7	7	7	8	7	105	105	1	97	NaN	NaN	NaN	NaN
Q7TUC7	Histidine biosynthesis bifunctional protein HisIE	Basic Cellular Processes	0.0425553	0.0223301	25.1235	24.0595	1.06402	0.319784	2	2	2	13.2	13.2	13.2	14.72	0	5.2594	20428000	4	2	2	2	1	1	2	0	1	2	1	1	2	0	1	2	1	1	2	0	1	2	1	129	129	1	7	NaN	NaN	NaN	NaN
Q7TUC8	Tryptophan synthase alpha chain	Central Metabolism	0.00486334	0.00388658	22.181	21.7738	0.407249	0.749059	30	30	30	77.6	77.6	77.6	48.059	0	323.31	84337000000	578	30	30	30	1	26	26	26	28	28	28	26	26	26	28	28	28	26	26	26	28	28	28	442	442	1	473	NaN	NaN	NaN	NaN
Q7TUC9	Possible Helix-turn-helix domain of resolvase	Basic Cellular Processes	0.00653391	0.00607086	21.5488	21.1599	0	1	10	10	10	41.2	41.2	41.2	25.197	0	58.685	603770000	52	10	10	10	1	10	9	9	8	9	9	10	9	9	8	9	9	10	9	9	8	9	9	221	221	1	66	NaN	NaN	NaN	NaN
Q7TUD0	Photosystem II lipoprotein Psb27	Photosynthesis	0.0465043	0.0155367	24.5445	22.9442	1.60024	0.285154	5	5	5	26.9	26.9	26.9	30.896	0	25.862	58893000	12	5	5	5	1	5	1	3	1	3	4	5	1	3	1	3	4	5	1	3	1	3	4	279	279	1	18	NaN	NaN	NaN	NaN
Q7TUD1	Acetylglutamate kinase	Central Metabolism	0.0527223	0.075495	25.886	26.1997	-0.313755	0.275529	2	2	2	25	25	25	13.468	0.006435	2.6175	5304500	2	2	2	2	1	2	0	1	0	0	0	2	0	1	0	0	0	2	0	1	0	0	0	116	116	1	3	NaN	NaN	NaN	NaN
Q7TUD2	PUTATIVE PRECORRIN-4 C11-METHYLTRANSFERASE	Central Metabolism	0.00296168	0.00376414	21.4201	21.4485	0	1	10	10	10	59.3	59.3	59.3	16.529	0	62.592	488050000	48	10	10	10	1	10	7	10	3	9	8	10	7	10	3	9	8	10	7	10	3	9	8	145	145	1	68	NaN	NaN	NaN	NaN
Q7TUD3	Putative Riboflavin synthase alpha chain	Central Metabolism	0.0732272	0.0763979	26.0095	25.8334	0.176099	0.585272	17	17	16	73.6	73.6	73.6	30.607	0	147.84	2107400000	112	17	17	16	1	14	14	11	15	15	15	14	14	11	15	15	15	14	14	11	15	15	15	284	284	1	119	NaN	NaN	NaN	NaN
Q7TUD6	Putative Cystathionine gamma-synthase	Central Metabolism	0.0153978	0.0145625	24.6012	24.2706	0.330618	0.402816	2	2	2	9.6	9.6	9.6	28.296	0.0088272	2.2602	6446500	2	2	2	2	1	2	0	1	0	1	0	2	0	1	0	1	0	2	0	1	0	1	0	251	251	1	4	NaN	NaN	NaN	NaN
Q7TUD7	Possible Cystathionine gamma-synthase	Central Metabolism	0.00427862	0.00708514	22.8346	23.5204	-0.685832	0.415138	11	11	11	59.8	59.8	59.8	24.598	0	103.39	1063900000	81	11	11	11	1	11	11	11	11	11	11	11	11	11	11	11	11	11	11	11	11	11	11	219	219	1	83	NaN	NaN	NaN	NaN
Q7TUD8	DNA repair protein RecO	Basic Cellular Processes	0.00287062	0.00188382	21.4935	20.7049	0	1	12	12	12	30.2	30.2	30.2	43.076	0	24.044	423420000	38	12	12	12	1	11	11	8	11	11	10	11	11	8	11	11	10	11	11	8	11	11	10	387	387	1	62	NaN	NaN	NaN	NaN
Q7TUD9	Possible Glycosyl transferase, group 1	Central Metabolism	0.00538151	0.00877933	22.9112	23.5379	-0.626715	0.328684	11	11	11	24.9	24.9	24.9	55.513	0	51.65	220870000	42	11	11	11	1	5	9	2	7	10	10	5	9	2	7	10	10	5	9	2	7	10	10	489	489	1	50	NaN	NaN	NaN	NaN
Q7TUE1	Possible Ribosomal RNA adenine dimethylase	Basic Cellular Processes	0.0165094	0.00342798	23.3105	20.9421	2.36838	0.46	2	2	2	9.3	9.3	9.3	28.886	0.008805	2.2183	13566000	2	2	2	2	1	1	1	0	1	2	2	1	1	0	1	2	2	1	1	0	1	2	2	259	259	1	8	NaN	NaN	NaN	NaN
Q7TUE4	Possible Malic enzyme	Oxidative Stress	0.237521	0.272083	26.6507	26.6227	0.028017	0.95466	7	7	7	16.8	16.8	16.8	43.375	0	16.365	183550000	23	7	7	7	1	4	7	0	6	6	7	4	7	0	6	6	7	4	7	0	6	6	7	388	388	1	35	NaN	NaN	NaN	NaN
Q7TUE6	Proline iminopeptidase	Central Metabolism	0.00799223	0.0124181	23.3186	23.7482	-0.429594	0.284842	2	2	2	12.5	12.5	12.5	18.86	0	10.437	37718000	2	2	2	2	1	2	2	2	0	2	2	2	2	2	0	2	2	2	2	2	0	2	2	168	168	1	10	NaN	NaN	NaN	NaN
Q7TUF4	Carboxyl-terminal processing proteinase	Central Metabolism	0.00221695	0.00254828	21.4856	21.9045	-0.418868	0.750211	6	6	6	79.2	79.2	79.2	11.865	0	62.249	2359800000	117	6	6	6	1	6	6	6	6	6	6	6	6	6	6	6	6	6	6	6	6	6	6	106	106	1	119	NaN	NaN	NaN	NaN
Q7TUF7	tRNA nucleotidyltransferase/poly(A) polymerase	Basic Cellular Processes	0.00147137	0.00158177	21.2421	21.0873	0	1	11	11	11	35.2	35.2	35.2	36.454	0	37.758	324910000	46	11	11	11	1	8	9	4	10	10	11	8	9	4	10	10	11	8	9	4	10	10	11	315	315	1	59	NaN	NaN	NaN	NaN
Q7TUG0	Queuine tRNA-ribosyltransferase	Basic Cellular Processes	0.00486817	0.0111293	22.3214	23.8241	-1.50277	0.310038	5	5	5	15.2	15.2	15.2	47.585	0	11.204	33063000	7	5	5	5	1	1	1	1	2	3	5	1	1	1	2	3	5	1	1	1	2	3	5	429	429	1	13	NaN	NaN	NaN	NaN
Q7TUG1	Bifunctional purine biosynthesis protein PurH	Central Metabolism	0.0648569	0.141847	26.4678	27.9771	-1.50932	0.327286	1	1	1	3.9	3.9	3.9	48.933	0.0088384	2.2761	19115000	2	1	1	1	1	1	1	0	1	1	1	1	1	0	1	1	1	1	1	0	1	1	1	415	415	1	5	NaN	NaN	NaN	NaN
Q7TUG2	CinA-like protein	Basic Cellular Processes	0.00276373	0.00295991	21.769	22.0926	-0.323648	0.827238	13	13	13	34.1	34.1	34.1	41.711	0	43.021	428170000	47	13	13	13	1	10	10	3	11	12	12	10	10	3	11	12	12	10	10	3	11	12	12	372	372	1	73	NaN	NaN	NaN	NaN
Q7TUG4	dCTP deaminase	Central Metabolism	0.0242657	0.00526334	23.7516	21.7469	2.00472	0.302936	28	28	28	49.5	49.5	49.5	57.418	0	323.31	6324800000	211	28	28	28	1	22	24	11	28	25	26	22	24	11	28	25	26	22	24	11	28	25	26	517	517	1	234	NaN	NaN	NaN	NaN
Q7TUG6	Glyoxalase/Bleomycin resistance protein/Dioxygenase superfamily	Other	0.0207881	0.0207833	23.4636	23.2151	0.248466	0.351087	7	7	7	20.6	20.6	20.6	47.573	0	25.084	98146000	20	7	7	7	1	7	4	0	2	5	7	7	4	0	2	5	7	7	4	0	2	5	7	433	433	1	26	NaN	NaN	NaN	NaN
Q7TUG8	Nicotinate-nucleotide pyrophosphorylase:Quinolinate phosphoriobsyl transferase	Central Metabolism	0.0619048	0.0367642	26.1278	25.1852	0.942633	0.281378	6	6	6	34.5	34.5	34.5	22.095	0	12.361	98536000	8	6	6	6	1	6	2	3	1	2	2	6	2	3	1	2	2	6	2	3	1	2	2	197	197	1	16	NaN	NaN	NaN	NaN
Q7TUG9	Glutathione synthetase	Central Metabolism	0.0140663	0.0368851	23.1219	25.2725	-2.15064	0.345603	3	3	3	15.4	15.4	15.4	14.635	0	8.2899	99156000	13	3	3	3	1	2	2	3	2	2	2	2	2	3	2	2	2	2	2	3	2	2	2	130	130	1	13	NaN	NaN	NaN	NaN
Q7TUH0	Tryptophan synthase beta chain	Central Metabolism	0.01104	0.00871117	24.0041	23.4585	0.545572	0.60495	17	17	17	56.2	56.2	56.2	32.366	0	66.573	1280300000	84	17	17	17	1	15	15	15	15	15	17	15	15	15	15	15	17	15	15	15	15	15	17	288	288	1	116	NaN	NaN	NaN	NaN
Q7TUH5	Putative Rubisco transcriptional regulator	Carbon Fixation	0.00985509	0.00782032	23.1127	23.0849	0.0277564	0.986699	14	14	14	50.8	50.8	50.8	34.254	0	70.035	702240000	73	14	14	14	1	9	13	0	12	12	12	9	13	0	12	12	12	9	13	0	12	12	12	307	307	1	81	NaN	NaN	NaN	NaN
Q7TUH7	PUTATIVE THIAMINE BIOSYNTHESIS OXIDOREDUCTASE	Central Metabolism	0.0113046	0.0142764	23.3206	24.1712	-0.850571	0.533047	9	9	9	27.8	27.8	27.8	44.899	0	69.576	207420000	36	9	9	9	1	8	8	4	3	6	7	8	8	4	3	6	7	8	8	4	3	6	7	414	414	1	37	NaN	NaN	NaN	NaN
Q7TUH8	Possible Bacterial type II secretion system pr	Membrane Transport	0.916731	0.67155	28.9899	28.3212	0.668671	0.332699	12	12	12	51.1	51.1	51.1	35.25	0	46.323	213540000	23	12	12	12	1	12	6	0	5	7	6	12	6	0	5	7	6	12	6	0	5	7	6	317	317	1	37	NaN	NaN	NaN	NaN
Q7TUH9	Biotin carboxyl carrier protein of acetyl-CoA carboxylase	Central Metabolism	0.0124068	0.0052141	22.7606	21.4804	1.28014	0.415925	18	18	18	40.7	40.7	40.7	41.476	0	51.395	634480000	65	18	18	18	1	12	16	2	17	16	18	12	16	2	17	16	18	12	16	2	17	16	18	369	369	1	95	NaN	NaN	NaN	NaN
Q7TUI0	Glyceraldehyde-3-phosphate dehydrogenase	Central Metabolism	0.452978	0.891254	28.721	30.0227	-1.30166	0.348553	15	15	15	53.2	53.2	53.2	16.272	0	241	5660300000	107	15	15	15	1	10	10	14	12	11	11	10	10	14	12	11	11	10	10	14	12	11	11	139	139	1	113	NaN	NaN	NaN	NaN
Q7TUI1	Argininosuccinate lyase	Central Metabolism	0.0141775	0.0234542	23.7767	25.1685	-1.39185	0.463779	3	3	3	35.1	35.1	35.1	18.678	0	16.669	28957000	8	3	3	3	1	3	0	3	0	0	0	3	0	3	0	0	0	3	0	3	0	0	0	168	168	1	6	NaN	NaN	NaN	NaN
Q7TUI2	Amidophosphoribosyltransferase	Central Metabolism	0.0144258	0.0270043	23.9715	25.4888	-1.51735	0.426673	31	31	31	80.9	80.9	80.9	36.99	0	323.31	37521000000	358	31	31	31	1	29	30	21	31	31	31	29	30	21	31	31	31	29	30	21	31	31	31	340	340	1	331	NaN	NaN	NaN	NaN
Q7U394	Conserved hypothetical	Central Metabolism	0.00352454	0.00464964	22.3529	22.9553	-0.602407	0.600708	15	15	15	29.4	29.4	29.4	52.366	0	52.737	962780000	65	15	15	15	1	13	14	2	14	14	13	13	14	2	14	14	13	13	14	2	14	14	13	459	459	1	86	NaN	NaN	NaN	NaN
Q7UZF3	Uncharacterized protein	Uncharacterized	0.0255215	0.0191931	24.2609	23.6314	0.629569	0.4122	19	19	19	44.2	44.2	44.2	54.948	0	108.57	1201200000	115	19	19	19	1	15	17	0	18	17	18	15	17	0	18	17	18	15	17	0	18	17	18	486	486	1	121	NaN	NaN	NaN	NaN
Q7UZF5	UvrABC system protein A	Uncharacterized	0.00412664	0.00331743	23.7684	23.4405	0.327853	0.730403	10	10	10	23.2	23.2	23.2	54.798	0	33.801	183390000	37	10	10	10	1	9	8	1	7	7	9	9	8	1	7	7	9	9	8	1	7	7	9	488	488	1	42	NaN	NaN	NaN	NaN
Q7UZG0	Argininosuccinate synthase	Other	0.063817	0.123597	26.1076	27.4168	-1.3092	0.370435	7	7	7	49.7	49.7	49.7	21.496	0	48.07	318810000	38	7	7	7	1	6	6	7	7	7	7	6	6	7	7	7	7	6	6	7	7	7	7	191	191	1	46	NaN	NaN	NaN	NaN
Q7UZG1	30S ribosomal protein S6	Central Metabolism	0.14677	0.0490877	26.3287	24.6537	1.67495	0.25607	23	23	23	30	30	30	105.95	0	77.004	420550000	54	23	23	23	1	23	10	8	11	14	12	23	10	8	11	14	12	23	10	8	11	14	12	966	966	1	83	NaN	NaN	NaN	NaN
Q7UZG2	Shikimate dehydrogenase (NADP(+))	Basic Cellular Processes	0.0164568	0.0439129	23.5114	25.4277	-1.91627	0.322477	36	36	36	68.1	68.1	68.1	44.674	0	278.04	6444100000	244	36	36	36	1	27	31	12	34	34	36	27	31	12	34	34	36	27	31	12	34	34	36	404	404	1	276	NaN	NaN	NaN	NaN
Q7UZG3	Chaperone protein dnaK2	Central Metabolism	0.0610907	0.0541226	27.1858	26.8622	0.32365	0.563926	11	11	11	54.5	54.5	54.5	17.707	0	34.626	1087600000	57	11	11	11	1	11	7	9	7	8	7	11	7	9	7	8	7	11	7	9	7	8	7	154	154	1	60	NaN	NaN	NaN	NaN
Q7UZG4	NAD binding site:D-amino acid oxidase	Basic Cellular Processes	0.0012344	0.00208454	20.8548	21.1861	0	1	11	11	11	47	47	47	31.657	0	50.559	885950000	53	11	11	11	1	9	9	2	11	10	10	9	9	2	11	10	10	9	9	2	11	10	10	285	285	1	60	NaN	NaN	NaN	NaN
Q7UZG5	Formyltetrahydrofolate deformylase	Central Metabolism	0.0461335	0.0789363	25.6034	26.2668	-0.663401	0.247956	41	41	41	52.7	52.7	52.7	68.243	0	265.92	5056800000	211	41	41	41	1	35	26	18	30	32	32	35	26	18	30	32	32	35	26	18	30	32	32	634	634	1	234	NaN	NaN	NaN	NaN
Q7UZG7	Aconitate hydratase B	Central Metabolism	0.00148463	0.00166357	22.0437	22.2886	-0.244932	0.820086	1	1	1	5.6	5.6	5.6	41.546	0.001355	3.3762	7510800	2	1	1	1	1	0	1	0	0	1	0	0	1	0	0	1	0	0	1	0	0	1	0	360	360	1	2	NaN	NaN	NaN	NaN
Q7UZG8	Phospho-2-dehydro-3-deoxyheptonate aldolase	Central Metabolism	0.0107762	0.0214672	23.2821	24.7117	-1.4296	0.390784	16	16	16	76.8	76.8	76.8	32.619	0	111.26	1728300000	93	16	16	16	1	12	14	10	15	16	14	12	14	10	15	16	14	12	14	10	15	16	14	284	284	1	113	NaN	NaN	NaN	NaN
Q7UZH2	Putative uroporphyrin-III C-methyltransferase	Central Metabolism	0.0151381	0.0191701	23.9264	24.0693	-0.142865	0.796361	8	8	8	10	10	10	94.883	0	19.255	76514000	14	8	8	8	1	4	4	0	5	3	5	4	4	0	5	3	5	4	4	0	5	3	5	857	857	1	21	NaN	NaN	NaN	NaN
Q7UZH3	Aminotransferases class-IV	Central Metabolism	0.00922625	0.0114717	23.3486	23.4203	-0.0717309	0.805434	14	14	14	55.2	55.2	55.2	39.418	0	59.328	750940000	70	14	14	14	1	9	12	0	12	12	13	9	12	0	12	12	13	9	12	0	12	12	13	355	355	1	77	NaN	NaN	NaN	NaN
Q7UZH4	Possible p-aminobenzoate synthetase	Central Metabolism	0.00136906	0.00137825	21.0553	20.9933	0.0619691	0.954256	8	8	8	37.5	37.5	37.5	28.091	0	27.585	350820000	32	8	8	8	1	7	5	4	6	6	5	7	5	4	6	6	5	7	5	4	6	6	5	261	261	1	42	NaN	NaN	NaN	NaN
Q7UZH5	7-cyano-7-deazaguanine synthase	Central Metabolism	0.00618814	0.0127956	22.2008	23.2986	-1.09778	0.282053	8	8	8	31.6	31.6	31.6	32.178	0	25.829	215990000	34	8	8	8	1	6	7	4	7	7	7	6	7	4	7	7	7	6	7	4	7	7	7	275	275	1	49	NaN	NaN	NaN	NaN
Q7UZH7	CTP synthase	Central Metabolism	0.0205531	0.0505732	24.98	26.5224	-1.54233	0.280139	2	2	2	5.2	5.2	5.2	50.005	0	4.7531	21555000	6	2	2	2	1	2	2	0	2	1	2	2	2	0	2	1	2	2	2	0	2	1	2	439	439	1	9	NaN	NaN	NaN	NaN
Q7UZH8	Aspartate--tRNA(Asp/Asn) ligase	Central Metabolism	0.046044	0.104254	26.264	27.7382	-1.47426	0.291036	6	6	6	38.4	38.4	38.4	25.066	0	66.268	180570000	27	6	6	6	1	3	6	0	6	6	6	3	6	0	6	6	6	3	6	0	6	6	6	224	224	1	32	NaN	NaN	NaN	NaN
Q7UZH9	Arginase family	Central Metabolism	0.0113564	0.020077	23.5125	24.3435	-0.831062	0.291245	27	27	27	60.3	60.3	60.3	59.828	0	189.42	4624900000	155	27	27	27	1	22	25	10	26	24	25	22	25	10	26	24	25	22	25	10	26	24	25	536	536	1	179	NaN	NaN	NaN	NaN
Q7UZI0	Polyamine aminopropyltransferase	Basic Cellular Processes	0.0169814	0.0137243	24.288	23.7292	0.558798	0.796	50	50	50	74.1	74.1	74.1	67.993	0	323.31	10829000000	347	50	50	50	1	34	44	19	49	49	49	34	44	19	49	49	49	34	44	19	49	49	49	598	598	1	383	NaN	NaN	NaN	NaN
Q7UZI3	Valine--tRNA ligase	Basic Cellular Processes	0.00559025	0.010911	24.1146	25.1028	-0.988171	0.285115	9	9	9	36.1	36.1	36.1	32.571	0	59.748	525750000	52	9	9	9	1	5	8	4	8	8	9	5	8	4	8	8	9	5	8	4	8	8	9	294	294	1	57	NaN	NaN	NaN	NaN
Q7UZI6	ATP-dependent DNA ligase	Basic Cellular Processes	0.00228621	0.00354909	21.8628	22.4061	-0.543288	0.414289	6	6	6	26.5	26.5	26.5	32.518	0	29.202	308740000	22	6	6	6	1	4	5	3	4	4	5	4	5	3	4	4	5	4	5	3	4	4	5	283	283	1	35	NaN	NaN	NaN	NaN
Q7UZI9	Uncharacterized protein	Uncharacterized	0.00258198	0.00360409	20.9799	21.1654	0	1	32	32	32	34.9	34.9	34.9	106.31	0	191.36	1701800000	164	32	32	32	1	25	30	13	28	31	29	25	30	13	28	31	29	25	30	13	28	31	29	918	918	1	213	NaN	NaN	NaN	NaN
Q7UZJ1	50S ribosomal protein L9	Basic Cellular Processes	0.0186987	0.0269404	23.483	23.792	-0.308963	0.373467	4	4	4	11.5	11.5	11.5	51.113	0	7.0991	44865000	7	4	4	4	1	1	2	0	1	4	3	1	2	0	1	4	3	1	2	0	1	4	3	443	443	1	11	NaN	NaN	NaN	NaN
Q7UZJ3	Uncharacterized protein	Uncharacterized	0.00505454	0.00906135	21.8655	22.8004	-0.934877	0.434301	3	3	3	15.9	15.9	15.9	25.145	0	7.7787	10070000	4	3	3	3	1	3	0	0	0	0	1	3	0	0	0	0	1	3	0	0	0	0	1	214	214	1	4	NaN	NaN	NaN	NaN
Q7UZJ4	Uncharacterized protein	Uncharacterized	0.00452217	0.00676857	22.4115	23.2925	-0.880974	0.517975	7	7	7	50.3	50.3	50.3	16.385	0	22.679	336630000	36	7	7	7	1	7	5	6	5	6	6	7	5	6	5	6	6	7	5	6	5	6	6	151	151	1	42	NaN	NaN	NaN	NaN
Q7UZJ5	Glycine dehydrogenase (aminomethyl-transferring)	Central Metabolism	0.00115612	0.00187287	21.927	22.6038	-0.676795	0.441317	3	3	3	11.9	11.9	11.9	26.651	0	9.4243	82636000	12	3	3	3	1	2	3	1	2	3	3	2	3	1	2	3	3	2	3	1	2	3	3	235	235	1	18	NaN	NaN	NaN	NaN
Q7UZJ7	SqdX	Other	0.0144209	0.0274368	23.5839	25.0963	-1.51238	0.403054	6	6	6	17.5	17.5	17.5	47.354	0	33.041	158450000	32	6	6	6	1	5	5	1	6	5	6	5	5	1	6	5	6	5	5	1	6	5	6	429	429	1	33	NaN	NaN	NaN	NaN
Q7UZJ8	Sulfolipid (UDP-sulfoquinovose) biosynthesis protein	Central Metabolism	0.0174004	0.0252638	24.6555	25.1089	-0.453364	0.441242	4	4	4	3.9	3.9	3.9	108.15	0	12.757	85073000	15	4	4	4	1	3	3	2	4	3	3	3	3	2	4	3	3	3	3	2	4	3	3	969	969	1	22	NaN	NaN	NaN	NaN
Q7UZJ9	Thiazole synthase	Central Metabolism	0.0170263	0.0170856	22.9985	23.9434	-0.944864	0.705436	14	14	14	45.6	45.6	45.6	41.762	0	61.443	940390000	58	14	14	14	1	10	11	4	12	11	12	10	11	4	12	11	12	10	11	4	12	11	12	377	377	1	80	NaN	NaN	NaN	NaN
Q7UZK1	50S ribosomal protein L20	Basic Cellular Processes	0.0968953	0.0406255	25.406	23.9918	1.41412	0.267857	20	20	20	58.2	58.2	58.2	44.462	0	233.19	1970900000	141	20	20	20	1	18	17	10	18	17	18	18	17	10	18	17	18	18	17	10	18	17	18	397	397	1	158	NaN	NaN	NaN	NaN
Q7UZK6	ATP-dependent Clp protease ATP-binding subunit ClpX	Basic Cellular Processes	0.0077426	0.00158332	23.497	21.2855	2.21148	0.299213	5	5	5	27.5	27.5	27.5	28.567	0	14.283	170060000	17	5	5	5	1	5	4	2	3	4	5	5	4	2	3	4	5	5	4	2	3	4	5	265	265	1	25	NaN	NaN	NaN	NaN
Q7UZK7	ATP-dependent Clp protease proteolytic subunit 3	Basic Cellular Processes	0.0434435	0.0777685	24.9229	25.8343	-0.911374	0.371089	6	6	6	40.9	40.9	40.9	13.478	0	20.622	223810000	16	6	6	6	1	5	4	6	3	5	2	5	4	6	3	5	2	5	4	6	3	5	2	115	115	1	27	NaN	NaN	NaN	NaN
Q7UZK9	4-hydroxy-tetrahydrodipicolinate synthase	Central Metabolism	0.135097	0.0811984	27.3449	26.3481	0.99676	0.275569	6	6	6	16.9	16.9	16.9	50.606	0	27.939	71966000	5	6	6	6	1	5	2	4	2	3	1	5	2	4	2	3	1	5	2	4	2	3	1	455	455	1	17	NaN	NaN	NaN	NaN
Q7UZL2	Uncharacterized protein	Uncharacterized	0.0425335	0.0683485	25.1119	25.9819	-0.86997	0.439469	10	10	10	42.3	42.3	42.3	23.692	0	42.366	784290000	45	10	10	10	1	9	8	4	10	10	10	9	8	4	10	10	10	9	8	4	10	10	10	215	215	1	57	NaN	NaN	NaN	NaN
Q7UZL4	Aspartate kinase	Central Metabolism	0.0213446	0.0438441	24.8658	26.4641	-1.59828	0.386006	15	15	15	52.6	52.6	52.6	32.606	0	99.557	3269600000	131	15	15	15	1	14	13	15	13	15	14	14	13	15	13	15	14	14	13	15	13	15	14	302	302	1	137	NaN	NaN	NaN	NaN
Q7UZL7	6,7-dimethyl-8-ribityllumazine synthase	Central Metabolism	0.841955	1.06151	29.0486	29.1701	-0.121588	0.804353	12	12	12	53.5	53.5	53.5	28.691	0	121.25	1162700000	64	12	12	12	1	9	11	5	10	11	12	9	11	5	10	11	12	9	11	5	10	11	12	269	269	1	70	NaN	NaN	NaN	NaN
Q7UZM1	Protein translocase subunit SecA	Membrane Transport	0.00551428	0.000870284	23.4994	21.4459	2.05352	0.39166	32	32	32	58.2	58.2	58.2	63.343	0	203.27	4013800000	185	32	32	32	1	22	29	8	31	30	29	22	29	8	31	30	29	22	29	8	31	30	29	586	586	1	209	NaN	NaN	NaN	NaN
Q7UZM3	Possible transcriptional regulator	Basic Cellular Processes	0.00513542	0.00212435	22.246	21.099	1.14705	0.432943	13	13	13	90.5	90.5	90.5	17.207	0	236.27	11440000000	161	13	13	13	1	11	13	12	12	13	13	11	13	12	12	13	13	11	13	12	12	13	13	158	158	1	141	NaN	NaN	NaN	NaN
Q7UZM4	DNA gyrase subunit B	Basic Cellular Processes	0.0102943	0.0103169	24.233	24.5264	-0.293363	0.838557	12	12	12	15	15	15	107.76	0	23.483	107950000	17	12	12	12	1	11	0	5	1	2	1	11	0	5	1	2	1	11	0	5	1	2	1	943	943	1	22	NaN	NaN	NaN	NaN
Q7UZM8	Magnesium transporter MgtE	Membrane Transport	0.0072026	0.00704465	23.7769	23.4982	0.278736	0.546329	4	4	4	15.8	15.8	15.8	36.043	0	13.095	37726000	7	4	4	4	1	4	2	1	1	2	2	4	2	1	1	2	2	4	2	1	1	2	2	323	323	1	12	NaN	NaN	NaN	NaN
Q7UZN3	Adenosylhomocysteinase	Central Metabolism	0.0413403	0.0571214	25.963	26.4657	-0.502663	0.648553	18	18	18	32.1	32.1	32.1	73.507	0	52.986	491140000	47	18	18	18	1	18	10	5	12	16	11	18	10	5	12	16	11	18	10	5	12	16	11	655	655	1	92	NaN	NaN	NaN	NaN
Q7UZN6	Rod shape determining protein	Basic Cellular Processes	0.00241903	0.00426223	21.4131	22.356	-0.942986	0.398329	7	7	7	21.1	21.1	21.1	51.436	0	31.38	131670000	28	7	7	7	1	3	6	4	4	4	6	3	6	4	4	4	6	3	6	4	4	4	6	469	469	1	27	NaN	NaN	NaN	NaN
Q7UZN9	Two-component response regulator	Other	0.0353287	0.00923438	24.8745	22.9591	1.91532	0.339111	26	26	26	44.5	44.5	44.5	51.826	0	144.7	4826400000	179	26	26	26	1	24	23	15	23	23	26	24	23	15	23	23	26	24	23	15	23	23	26	472	472	1	207	NaN	NaN	NaN	NaN
Q7UZP0	Lysine--tRNA ligase	Basic Cellular Processes	0.0224004	0.0377722	25.1042	26.0544	-0.950148	0.414037	5	5	5	18	18	18	37.254	0	10.714	54301000	14	5	5	5	1	3	3	1	3	3	3	3	3	1	3	3	3	3	3	1	3	3	3	350	350	1	16	NaN	NaN	NaN	NaN
Q7UZP1	Uncharacterized protein	Uncharacterized	0.12368	0.0594067	25.3687	23.9694	1.39924	0.270231	17	17	17	60.5	60.5	60.5	27.421	0	88.548	584160000	63	17	17	17	1	16	9	13	6	8	9	16	9	13	6	8	9	16	9	13	6	8	9	248	248	1	73	NaN	NaN	NaN	NaN
Q7UZP5	Zinc metallopeptidase M20/M25/M40 family	Basic Cellular Processes	0.0290865	0.0333715	25.4824	25.4642	0.0182432	0.93596	26	26	26	46.3	46.3	46.3	58.823	0	171.99	2031200000	128	26	26	26	1	15	22	10	20	25	22	15	22	10	20	25	22	15	22	10	20	25	22	512	512	1	152	NaN	NaN	NaN	NaN
Q7UZP7	Phosphomethylpyrimidine synthase	Central Metabolism	0.0116708	0.00229331	23.0719	21.8	1.27192	0.528467	5	5	5	67.5	67.5	67.5	9.5036	0	26.595	515880000	50	5	5	5	1	4	5	5	2	4	5	4	5	5	2	4	5	4	5	5	2	4	5	83	83	1	50	NaN	NaN	NaN	NaN
Q7UZP8	Transketolase	Carbon Fixation	0.222789	0.491588	28.7645	30.1388	-1.37427	0.280221	17	17	17	49.2	49.2	49.2	41.815	0	103.2	1267700000	94	17	17	17	1	15	15	12	14	14	16	15	15	12	14	14	16	15	15	12	14	14	16	386	386	1	107	NaN	NaN	NaN	NaN
Q7UZP9	3-oxoacyl-[acyl-carrier-protein] synthase 2	Central Metabolism	0.0754278	0.145612	26.5397	27.6937	-1.15405	0.328048	12	12	12	36.6	36.6	36.6	50.873	0	74.914	193760000	20	12	12	12	1	12	6	3	4	4	4	12	6	3	4	4	4	12	6	3	4	4	4	456	456	1	38	NaN	NaN	NaN	NaN
Q7UZQ0	Acyl carrier protein	Central Metabolism	1.02053	0.497452	28.304	27.0242	1.27974	0.253396	44	44	44	66.2	66.2	66.2	72.987	0	323.31	41966000000	594	44	44	44	1	34	43	28	43	43	44	34	43	28	43	43	44	34	43	28	43	43	44	668	668	1	525	NaN	NaN	NaN	NaN
Q7UZQ2	Glutamine--fructose-6-phosphate aminotransferase [isomerizing]	Central Metabolism	0.00731132	0.00711775	23.9693	23.8433	0.125921	0.914589	18	18	18	72.9	72.9	72.9	43.368	0	150.69	5424900000	133	18	18	18	1	12	17	7	16	16	16	12	17	7	16	16	16	12	17	7	16	16	16	414	414	1	133	NaN	NaN	NaN	NaN
Q7UZQ5	Ribonuclease 3	Basic Cellular Processes	0.00333699	0.00344725	21.3882	21.4911	0	1	2	2	2	31.2	31.2	31.2	8.6345	0	35.526	1928300000	18	2	2	2	1	2	2	2	2	2	2	2	2	2	2	2	2	2	2	2	2	2	2	80	80	1	19	NaN	NaN	NaN	NaN
Q7UZQ7	Alpha-1,4 glucan phosphorylase	Central Metabolism	0.010384	0.00699013	25.1119	24.3431	0.768738	0.330269	16	16	16	27.6	27.6	27.6	69.487	0	77.503	510050000	60	16	16	16	1	14	11	6	8	12	14	14	11	6	8	12	14	14	11	6	8	12	14	631	631	1	78	NaN	NaN	NaN	NaN
Q7UZR1	Uncharacterized protein	Uncharacterized	0.00133481	0.00143867	21.0204	21.1613	0	1	2	2	2	10.4	10.4	10.4	28.697	0.0013624	3.4801	10903000	2	2	2	2	1	0	1	0	0	0	2	0	1	0	0	0	2	0	1	0	0	0	2	249	249	1	3	NaN	NaN	NaN	NaN
Q7UZR2	Isocitrate dehydrogenase [NADP]	Central Metabolism	0.14882	0.208154	28.1202	28.4041	-0.283825	0.28235	26	26	26	34.3	34.3	34.3	96.361	0	77.239	778400000	77	26	26	26	1	23	16	21	18	19	20	23	16	21	18	19	20	23	16	21	18	19	20	848	848	1	136	NaN	NaN	NaN	NaN
Q7UZR4	Heme oxygenase	Central Metabolism	0.00362028	0.00505289	21.5602	22.0356	-0.475358	0.508657	5	5	5	10.6	10.6	10.6	51.702	0	6.2686	25583000	6	5	5	5	1	1	3	0	2	4	2	1	3	0	2	4	2	1	3	0	2	4	2	452	452	1	12	NaN	NaN	NaN	NaN
Q7UZR5	Low molecular weight phosphotyrosine protein phosphatase	Basic Cellular Processes	0.00269193	0.00538451	20.7091	21.3596	0	1	31	31	31	53.4	53.4	53.4	52.629	0	245.97	14084000000	273	31	31	31	1	28	28	26	30	29	30	28	28	26	30	29	30	28	28	26	30	29	30	474	474	1	275	NaN	NaN	NaN	NaN
Q7UZR6	Bifunctional pantoate ligase/cytidylate kinase	Central Metabolism	0.00215194	0.00141595	21.9513	21.2425	0.708742	0.418649	5	5	5	24.6	24.6	24.6	27.243	0	9.8177	51934000	11	5	5	5	1	4	3	0	4	4	4	4	3	0	4	4	4	4	3	0	4	4	4	236	236	1	19	NaN	NaN	NaN	NaN
Q7UZR7	Phosphoribosylformylglycinamidine cyclo-ligase	Central Metabolism	0.00770569	0.00158732	22.6518	20.7997	1.85209	0.33529	1	1	1	9.6	9.6	9.6	17.79	0.0076336	2.3684	3299500	2	1	1	1	1	1	1	0	0	0	1	1	1	0	0	0	1	1	1	0	0	0	1	157	157	1	3	NaN	NaN	NaN	NaN
Q7UZS0	Uncharacterized protein	Uncharacterized	0.0101419	0.00593596	21.6647	20.8456	0	1	4	4	4	10.8	10.8	10.8	58.294	0	11.721	22626000	4	4	4	4	1	4	1	0	0	2	0	4	1	0	0	2	0	4	1	0	0	2	0	510	510	1	7	NaN	NaN	NaN	NaN
Q7UZS1	Putative ribonuclease D	Basic Cellular Processes	0.123569	0.138701	26.7393	26.6645	0.074756	0.50588	12	12	12	40.9	40.9	40.9	38.869	0	52.848	73753000	16	12	12	12	1	11	3	1	0	1	0	11	3	1	0	1	0	11	3	1	0	1	0	347	347	1	17	NaN	NaN	NaN	NaN
Q7UZS3	Oxygen-dependent coproporphyrinogen-III oxidase	Photosynthesis	0.0246047	0.0381305	25.0084	25.4876	-0.479135	0.261271	1	1	1	11.4	11.4	11.4	10.02	0.0013605	3.4487	2052800	1	1	1	1	1	1	0	0	0	0	0	1	0	0	0	0	0	1	0	0	0	0	0	88	88	1	1	NaN	NaN	NaN	NaN
Q7UZS4	Iron-sulfur cluster carrier protein	Central Metabolism	0.0106879	0.00518421	23.5616	22.5946	0.96691	0.429919	17	17	17	65.7	65.7	65.7	24.708	0	190.05	5251300000	178	17	17	17	1	17	17	17	17	17	17	17	17	17	17	17	17	17	17	17	17	17	17	213	213	1	190	NaN	NaN	NaN	NaN
Q7UZS7	Photosystem I protein PsaD	Photosynthesis	0.0256409	0.0030444	23.1816	20.4296	2.75204	0.277116	17	17	17	41.8	41.8	41.8	39.848	0	94.595	1214300000	97	17	17	17	1	13	16	13	17	17	16	13	16	13	17	17	16	13	16	13	17	17	16	342	342	1	131	NaN	NaN	NaN	NaN
Q7UZS8	Anthranilate synthase component I and chorismate binding enzyme	Central Metabolism	0.0423529	0.0843653	26.1074	27.1958	-1.08832	0.276139	10	10	10	29.6	29.6	29.6	38.754	0	41.965	171390000	20	10	10	10	1	10	4	4	3	5	5	10	4	4	3	5	5	10	4	4	3	5	5	355	355	1	32	NaN	NaN	NaN	NaN
Q7UZS9	Glutamate--cysteine ligase	Central Metabolism	0.0064856	0.0139951	22.5413	24.1602	-1.61894	0.346751	5	5	5	33.6	33.6	33.6	15.675	0	12.122	63060000	8	5	5	5	1	5	1	5	1	1	1	5	1	5	1	1	1	5	1	5	1	1	1	140	140	1	16	NaN	NaN	NaN	NaN
Q7UZT0	Phosphoenolpyruvate carboxylase	Carbon Fixation	0.00145375	0.000870497	22.1251	21.5616	0.563411	0.728626	31	31	31	65.8	65.8	65.8	57.322	0	261.15	6383100000	253	31	31	31	1	26	29	16	30	31	29	26	29	16	30	31	29	26	29	16	30	31	29	506	506	1	277	NaN	NaN	NaN	NaN
Q7UZT1	Uncharacterized protein	Uncharacterized	0.00301709	0.00484558	20.7099	21.2731	0	1	14	14	14	46.5	46.5	46.5	43.607	0	81.065	635110000	68	14	14	14	1	11	14	1	13	14	14	11	14	1	13	14	14	11	14	1	13	14	14	372	372	1	83	NaN	NaN	NaN	NaN
Q7UZT6	Molybdopterin biosynthesis protein	Central Metabolism	0.00440956	0.00279743	21.6562	21.5325	0.123715	0.963207	4	4	4	5.7	5.7	5.7	114.38	0	9.8559	17192000	5	4	4	4	1	4	0	2	0	0	1	4	0	2	0	0	1	4	0	2	0	0	1	989	989	1	7	NaN	NaN	NaN	NaN
Q7UZU0	Prephenate dehydrogenase	Central Metabolism	0.0180364	0.037445	23.9331	25.1651	-1.23195	0.318781	1	1	1	10.1	10.1	10.1	16.727	0.0076531	2.3918	1998200	1	1	1	1	1	1	0	0	0	0	0	1	0	0	0	0	0	1	0	0	0	0	0	148	148	1	1	NaN	NaN	NaN	NaN
Q7UZU3	Protein RecA	Basic Cellular Processes	0.0106543	0.00126547	23.5493	20.6221	2.9272	0.2754	6	6	6	23.8	23.8	23.8	42.971	0	14.702	108300000	11	6	6	6	1	5	2	1	1	3	2	5	2	1	1	3	2	5	2	1	1	3	2	382	382	1	20	NaN	NaN	NaN	NaN
Q7UZU4	Uncharacterized protein	Uncharacterized	0.020275	0.0164101	24.4169	23.8545	0.562425	0.274105	13	13	13	50.2	50.2	50.2	30.342	0	123.34	714670000	52	13	13	13	1	9	10	4	13	10	13	9	10	4	13	10	13	9	10	4	13	10	13	279	279	1	66	NaN	NaN	NaN	NaN
Q7UZU7	50S ribosomal protein L3	Basic Cellular Processes	0.131145	0.0808163	26.8201	25.9136	0.906429	0.261851	12	12	12	33.2	33.2	33.2	40.164	0	51.778	119470000	19	12	12	12	1	12	4	7	1	1	1	12	4	7	1	1	1	12	4	7	1	1	1	370	370	1	29	NaN	NaN	NaN	NaN
Q7UZU8	50S ribosomal protein L4	Basic Cellular Processes	0.170831	0.103427	27.1512	26.2215	0.929729	0.262367	5	5	5	19.4	19.4	19.4	30.667	0	15.38	186210000	29	5	5	5	1	5	5	5	5	5	5	5	5	5	5	5	5	5	5	5	5	5	5	258	258	1	30	NaN	NaN	NaN	NaN
Q7UZU9	50S ribosomal protein L23	Basic Cellular Processes	0.21773	0.122064	26.4091	25.3899	1.01922	0.277867	18	18	18	71.4	71.4	71.4	23.168	0	105.38	2452900000	115	18	18	18	1	17	16	16	13	15	13	17	16	16	13	15	13	17	16	16	13	15	13	217	217	1	131	NaN	NaN	NaN	NaN
Q7UZV0	50S ribosomal protein L2	Basic Cellular Processes	0.04069	0.0193822	25.5457	24.2442	1.3015	0.294667	19	19	19	72.4	72.4	72.4	23.168	0	144.81	3244200000	134	19	19	19	1	18	17	19	16	17	16	18	17	19	16	17	16	18	17	19	16	17	16	210	210	1	159	NaN	NaN	NaN	NaN
Q7UZV1	50S ribosomal protein L22	Basic Cellular Processes	0.123814	0.0778448	25.985	25.0945	0.89047	0.2536	7	7	7	66	66	66	11.349	0	61.125	1180300000	48	7	7	7	1	7	7	7	7	7	7	7	7	7	7	7	7	7	7	7	7	7	7	100	100	1	66	NaN	NaN	NaN	NaN
Q7UZV2	30S ribosomal protein S3	Basic Cellular Processes	0.022557	0.02655	24.4309	24.4551	-0.0241979	0.961761	12	12	12	38	38	38	31.755	0	41.342	841410000	62	12	12	12	1	11	11	11	8	8	8	11	11	11	8	8	8	11	11	11	8	8	8	287	287	1	81	NaN	NaN	NaN	NaN
Q7UZV3	50S ribosomal protein L16	Basic Cellular Processes	0.0218061	0.0313967	22.9302	24.0972	-1.167	0.528033	5	5	5	46.1	46.1	46.1	14.135	0	38.296	691970000	62	5	5	5	1	5	5	5	4	4	5	5	5	5	4	4	5	5	5	5	4	4	5	128	128	1	67	NaN	NaN	NaN	NaN
Q7UZV4	50S ribosomal protein L29	Basic Cellular Processes	0.123428	0.082911	25.147	24.356	0.791054	0.279176	14	14	14	49.8	49.8	49.8	27.466	0	50.058	990110000	74	14	14	14	1	12	11	9	13	14	13	12	11	9	13	14	13	12	11	9	13	14	13	243	243	1	86	NaN	NaN	NaN	NaN
Q7UZV5	50S ribosomal protein L24	Basic Cellular Processes	0.0122335	0.00877404	21.8153	21.3441	0.471218	0.825137	3	3	3	26.2	26.2	26.2	17.98	0	27.905	139850000	10	3	3	3	1	3	3	1	2	3	3	3	3	1	2	3	3	3	3	1	2	3	3	160	160	1	15	NaN	NaN	NaN	NaN
Q7UZV6	50S ribosomal protein L5	Basic Cellular Processes	0.0333557	0.0284216	24.5902	24.1206	0.469545	0.311833	9	9	9	73.6	73.6	73.6	8.4367	0	46.933	586850000	51	9	9	9	1	9	9	9	9	9	9	9	9	9	9	9	9	9	9	9	9	9	9	72	72	1	67	NaN	NaN	NaN	NaN
Q7UZV7	30S ribosomal protein S8	Basic Cellular Processes	0.0477765	0.0459944	24.6907	24.3807	0.310035	0.47533	5	5	5	46.6	46.6	46.6	13.479	0	8.01	57453000	5	5	5	5	1	3	2	1	1	3	3	3	2	1	1	3	3	3	2	1	1	3	3	118	118	1	13	NaN	NaN	NaN	NaN
Q7UZV8	50S ribosomal protein L6	Basic Cellular Processes	0.0514018	0.0491696	25.223	24.8945	0.328536	0.476394	9	9	9	53.9	53.9	53.9	19.732	0	46.899	562430000	56	9	9	9	1	9	9	9	8	8	9	9	9	9	8	8	9	9	9	9	8	8	9	178	178	1	69	NaN	NaN	NaN	NaN
Q7UZV9	50S ribosomal protein L18	Basic Cellular Processes	0.0257859	0.0228344	23.6802	23.2495	0.430676	0.345806	8	8	8	54.9	54.9	54.9	14.502	0	31.246	396400000	34	8	8	8	1	6	8	5	6	6	6	6	8	5	6	6	6	6	8	5	6	6	6	133	133	1	40	NaN	NaN	NaN	NaN
Q7UZW0	30S ribosomal protein S5	Basic Cellular Processes	0.0043964	0.00637345	21.8664	21.846	0	1	10	10	10	54.7	54.7	54.7	19.63	0	72.428	712060000	80	10	10	10	1	10	7	9	8	9	9	10	7	9	8	9	9	10	7	9	8	9	9	179	179	1	79	NaN	NaN	NaN	NaN
Q7UZW1	50S ribosomal protein L15	Basic Cellular Processes	0.00456616	0.00249447	21.474	20.3625	0	1	3	3	3	25.4	25.4	25.4	13.66	0	6.2625	152180000	9	3	3	3	1	3	3	3	3	3	3	3	3	3	3	3	3	3	3	3	3	3	3	122	122	1	24	NaN	NaN	NaN	NaN
Q7UZW3	Adenylate kinase	Energy Production and Conversion	0.0235849	0.0292514	24.1114	24.2096	-0.0982831	0.415577	2	2	2	11.7	11.7	11.7	22.204	0	7.6521	63042000	6	2	2	2	1	2	2	2	1	2	2	2	2	2	1	2	2	2	2	2	1	2	2	206	206	1	11	NaN	NaN	NaN	NaN
Q7UZW4	30S ribosomal protein S13	Basic Cellular Processes	0.0174441	0.0181181	23.1064	22.8436	0.262768	0.611258	3	3	3	28.3	28.3	28.3	16.757	0	4.4339	27327000	6	3	3	3	1	1	1	1	2	1	2	1	1	1	2	1	2	1	1	1	2	1	2	152	152	1	8	NaN	NaN	NaN	NaN
Q7UZW5	30S ribosomal protein S11	Basic Cellular Processes	0.0137259	0.0171417	22.854	22.9283	-0.0742264	0.775555	6	6	6	34.8	34.8	34.8	20.843	0	15.702	185570000	16	6	6	6	1	3	3	2	5	4	4	3	3	2	5	4	4	3	3	2	5	4	4	184	184	1	22	NaN	NaN	NaN	NaN
Q7UZW6	DNA-directed RNA polymerase subunit alpha	Basic Cellular Processes	0.0258743	0.0078197	24.7806	23.0669	1.71371	0.271175	5	5	5	38.8	38.8	38.8	13.705	0	26.586	122260000	14	5	5	5	1	4	3	4	4	4	5	4	3	4	4	4	5	4	3	4	4	4	5	121	121	1	24	NaN	NaN	NaN	NaN
Q7UZW7	50S ribosomal protein L17	Basic Cellular Processes	0.112263	0.0762308	25.7165	24.9274	0.789097	0.313854	2	2	2	13.1	13.1	13.1	13.766	0	32.555	76098000	9	2	2	2	1	2	2	2	2	2	2	2	2	2	2	2	2	2	2	2	2	2	2	130	130	1	13	NaN	NaN	NaN	NaN
Q7UZW8	50S ribosomal protein L13	Basic Cellular Processes	0.421936	0.223235	27.8838	26.7781	1.10573	0.260667	10	10	10	44.9	44.9	44.9	34.281	0	72.566	455090000	39	10	10	10	1	10	5	9	6	8	7	10	5	9	6	8	7	10	5	9	6	8	7	312	312	1	55	NaN	NaN	NaN	NaN
Q7UZW9	30S ribosomal protein S9	Basic Cellular Processes	0.0124952	0.0274959	22.0219	23.6802	-1.65835	0.33394	7	7	7	43.1	43.1	43.1	13.273	0	22.871	679100000	32	7	7	7	1	6	6	7	4	6	6	6	6	7	4	6	6	6	6	7	4	6	6	116	116	1	42	NaN	NaN	NaN	NaN
Q7UZX3	Putative imidazoleglycerol-phosphate dehydratase	Central Metabolism	0.00360738	0.00359651	21.6488	21.5391	0.109662	0.936376	11	11	11	56.6	56.6	56.6	16.112	0	38.807	2964900000	80	11	11	11	1	11	10	11	10	10	10	11	10	11	10	10	10	11	10	11	10	10	10	143	143	1	87	NaN	NaN	NaN	NaN
Q7UZX7	Conserved hypothetical proein	Uncharacterized	0.00481948	0.00856381	21.8863	22.8868	-1.00049	0.333259	1	1	1	12.5	12.5	12.5	14.924	0	14.05	79864000	4	1	1	1	1	1	1	0	1	1	1	1	1	0	1	1	1	1	1	0	1	1	1	136	136	1	10	NaN	NaN	NaN	NaN
Q7UZX8	Uncharacterized protein	Uncharacterized	0.00362502	0.00588224	21.8419	22.5928	-0.75081	0.381862	5	5	5	34.1	34.1	34.1	30.136	0	11.969	67023000	10	5	5	5	1	1	3	0	4	4	3	1	3	0	4	4	3	1	3	0	4	4	3	267	267	1	17	NaN	NaN	NaN	NaN
Q7UZY3	Ferredoxin-dependent glutamate synthase, Fd-GOGAT	Inorganic Nutrient Processing	0.0075012	0.0167074	24.7824	26.4495	-1.66713	0.325041	4	4	4	11.2	11.2	11.2	29.476	0	10.41	74751000	13	4	4	4	1	3	3	1	3	3	4	3	3	1	3	3	4	3	3	1	3	3	4	251	251	1	17	NaN	NaN	NaN	NaN
Q7UZY4	30S ribosomal protein S12	Basic Cellular Processes	0.0084175	0.00487205	22.1019	21.0278	0	1	5	5	5	18.1	18.1	18.1	34.494	0	9.6065	87447000	19	5	5	5	1	3	4	1	4	5	5	3	4	1	4	5	5	3	4	1	4	5	5	299	299	1	24	NaN	NaN	NaN	NaN
Q7UZY5	30S ribosomal protein S7	Basic Cellular Processes	0.0617141	0.0656174	25.2879	25.1259	0.162032	0.747464	69	69	69	50.2	50.2	50.2	168.15	0	323.31	7932900000	381	69	69	69	1	40	56	20	65	63	61	40	56	20	65	63	61	40	56	20	65	63	61	1521	1521	1	432	NaN	NaN	NaN	NaN
Q7UZY6	Elongation factor G	Basic Cellular Processes	0.0400188	0.0447426	26.5826	26.7085	-0.125919	0.886696	2	2	2	10.4	10.4	10.4	13.893	0	5.8214	6538900	3	2	2	2	1	1	0	1	0	1	0	1	0	1	0	1	0	1	0	1	0	1	0	125	125	1	3	NaN	NaN	NaN	NaN
Q7UZY7	Elongation factor Tu	Basic Cellular Processes	0.335644	0.646639	28.5769	29.7913	-1.21439	0.351117	9	9	9	55.1	55.1	55.1	17.357	0	65.194	1066600000	81	9	9	9	1	9	9	9	9	9	9	9	9	9	9	9	9	9	9	9	9	9	9	156	156	1	84	NaN	NaN	NaN	NaN
Q7UZY8	30S ribosomal protein S10	Basic Cellular Processes	0.0245765	0.0392214	22.9634	23.8108	-0.847387	0.469381	46	46	46	66.6	66.6	66.6	75.689	0	323.31	6372200000	323	46	46	46	1	41	35	28	36	42	41	41	35	28	36	42	41	41	35	28	36	42	41	691	691	1	395	NaN	NaN	NaN	NaN
Q7UZZ1	Uncharacterized protein	Uncharacterized	0.00357443	0.00467431	21.1868	21.0903	0	1	43	43	43	93.5	93.5	93.5	43.621	0	323.31	57001000000	862	43	43	43	1	38	42	27	43	42	43	38	42	27	43	42	43	38	42	27	43	42	43	399	399	1	744	NaN	NaN	NaN	NaN
Q7UZZ3	LL-diaminopimelate aminotransferase	Central Metabolism	0.0376243	0.0632149	25.7969	26.4674	-0.670513	0.278452	5	5	5	52.8	52.8	52.8	12.046	0	11.97	104360000	14	5	5	5	1	3	4	1	4	4	3	3	4	1	4	4	3	3	4	1	4	4	3	106	106	1	19	NaN	NaN	NaN	NaN
Q7UZZ4	ATP-dependent Clp protease adapter protein ClpS	Basic Cellular Processes	0.00716217	0.00585266	21.6112	21.2386	0	1	1	1	1	6.4	6.4	6.4	19.051	0.0013459	3.314	1609400	1	1	1	1	1	1	0	0	0	0	0	1	0	0	0	0	0	1	0	0	0	0	0	172	172	1	1	NaN	NaN	NaN	NaN
Q7V000	Uncharacterized protein	Uncharacterized	0.00725698	0.0106018	21.2146	21.5637	0	1	32	32	32	73.8	73.8	73.8	45.575	0	133.79	3518600000	189	32	32	32	1	23	27	19	30	28	28	23	27	19	30	28	28	23	27	19	30	28	28	408	408	1	208	NaN	NaN	NaN	NaN
Q7V001	Transcription termination/antitermination protein NusA	Basic Cellular Processes	0.133294	0.0461603	27.7768	26.1417	1.63511	0.271338	1	1	1	8.5	8.5	8.5	13.206	0.0064767	2.6954	7276700	5	1	1	1	1	1	1	1	0	1	1	1	1	1	0	1	1	1	1	1	0	1	1	118	118	1	5	NaN	NaN	NaN	NaN
Q7V002	Ribosome maturation factor RimP	Basic Cellular Processes	0.0125027	0.00278764	22.9821	20.5213	2.46077	0.476	1	1	1	15.1	15.1	15.1	9.9958	0.0039735	2.8968	8085400	1	1	1	1	1	1	1	0	1	1	1	1	1	0	1	1	1	1	1	0	1	1	1	86	86	1	5	NaN	NaN	NaN	NaN
Q7V003	Ribose-5-phosphate isomerase A	Carbon Fixation	0.0366981	0.0587026	24.5365	25.5262	-0.989698	0.433545	29	29	29	67.9	67.9	67.9	52.999	0	284.44	4599200000	208	29	29	29	1	29	23	27	16	21	20	29	23	27	16	21	20	29	23	27	16	21	20	467	467	1	214	NaN	NaN	NaN	NaN
Q7V004	Histidinol dehydrogenase	Central Metabolism	0.0362304	0.0594019	25.7124	26.4484	-0.736039	0.368815	4	4	4	23.2	23.2	23.2	17.577	0	6.6392	33880000	5	4	4	4	1	4	1	4	1	1	0	4	1	4	1	1	0	4	1	4	1	1	0	155	155	1	11	NaN	NaN	NaN	NaN
Q7V005	D-aminoacyl-tRNA deacylase	Basic Cellular Processes	0.0320854	0.0464391	24.9783	25.3914	-0.413097	0.415868	9	9	9	51.1	51.1	51.1	24.881	0	89.401	823110000	58	9	9	9	1	4	8	2	8	6	9	4	8	2	8	6	9	4	8	2	8	6	9	231	231	1	69	NaN	NaN	NaN	NaN
Q7V006	DNA-directed RNA polymerase subunit beta	Basic Cellular Processes	0.00894888	0.00395153	25.116	23.8816	1.23441	0.320317	32	32	32	66.4	66.4	66.4	47.021	0	231.46	4771500000	178	32	32	32	1	25	30	14	29	32	30	25	30	14	29	32	30	25	30	14	29	32	30	428	428	1	236	NaN	NaN	NaN	NaN
Q7V007	DNA-directed RNA polymerase subunit gamma	Basic Cellular Processes	0.0065711	0.00306987	23.8619	22.7311	1.13081	0.34866	9	9	9	34.1	34.1	34.1	29.968	0	35.37	758840000	51	9	9	9	1	7	9	6	9	9	9	7	9	6	9	9	9	7	9	6	9	9	9	264	264	1	68	NaN	NaN	NaN	NaN
Q7V008	DNA-directed RNA polymerase subunit beta	Basic Cellular Processes	0.00626238	0.00247571	24.8595	23.5323	1.32719	0.326346	33	33	33	39.7	39.7	39.7	122.91	0	118.15	864820000	90	33	33	33	1	31	15	29	19	18	16	31	15	29	19	18	16	31	15	29	19	18	16	1097	1097	1	151	NaN	NaN	NaN	NaN
Q7V011	Uncharacterized protein	Uncharacterized	0.00493675	0.00446955	22.0196	21.9706	0.0489731	0.966645	12	12	12	19.9	19.9	19.9	72.379	0	64.154	344570000	39	12	12	12	1	12	9	10	10	10	10	12	9	10	10	10	10	12	9	10	10	10	10	634	634	1	75	NaN	NaN	NaN	NaN
Q7V019	Putative diaminopelargonic acid synthase	Central Metabolism	0.00862007	0.00657408	23.9028	23.0585	0.84424	0.418166	36	36	36	34.8	34.8	34.8	149.64	0	197.37	731490000	81	36	36	36	1	35	14	27	22	20	17	35	14	27	22	20	17	35	14	27	22	20	17	1366	1366	1	144	NaN	NaN	NaN	NaN
Q7V024	Fumarate hydratase class II	Central Metabolism	0.0206469	0.0367102	24.9772	25.8615	-0.884281	0.325245	2	2	2	12.9	12.9	12.9	28.884	0	14.18	35176000	6	2	2	2	1	2	2	0	2	2	2	2	2	0	2	2	2	2	2	0	2	2	2	256	256	1	10	NaN	NaN	NaN	NaN
Q7V025	Nitrogen regulatory protein P-II	Inorganic Nutrient Processing	0.378982	0.199283	27.349	26.2446	1.10448	0.259073	12	12	12	34.2	34.2	34.2	48.708	0	59.238	395960000	54	12	12	12	1	10	11	10	6	10	11	10	11	10	6	10	11	10	11	10	6	10	11	433	433	1	65	NaN	NaN	NaN	NaN
Q7V027	NADPH-dependent 7-cyano-7-deazaguanine reductase	Central Metabolism	0.00707129	0.0049705	21.815	21.1362	0	1	25	25	25	56.4	56.4	56.4	50.623	0	139.19	2539600000	138	25	25	25	1	20	24	11	23	23	22	20	24	11	23	23	22	20	24	11	23	23	22	461	461	1	170	NaN	NaN	NaN	NaN
Q7V037	ATP synthase subunit alpha	Energy Production and Conversion	0.011798	0.00651786	24.4497	23.4926	0.957106	0.328502	10	10	10	78.6	78.6	78.6	12.314	0	90.076	2033400000	74	10	10	10	1	10	9	10	9	8	10	10	9	10	9	8	10	10	9	10	9	8	10	112	112	1	95	NaN	NaN	NaN	NaN
Q7V038	ATP synthase gamma chain	Energy Production and Conversion	0.00434079	0.00267145	22.3207	21.4255	0.895251	0.431134	1	1	1	12.5	12.5	12.5	15.957	0	7.5804	6258800	2	1	1	1	1	1	0	0	0	0	0	1	0	0	0	0	0	1	0	0	0	0	0	136	136	1	2	NaN	NaN	NaN	NaN
Q7V041	Uncharacterized protein	Uncharacterized	0.00176005	0.0021346	21.2525	21.318	-0.0655772	0.913967	11	11	11	29.5	29.5	29.5	54.34	0	33.031	338960000	41	11	11	11	1	10	5	8	5	6	7	10	5	8	5	6	7	10	5	8	5	6	7	505	505	1	51	NaN	NaN	NaN	NaN
Q7V042	Glutamine-dependent NAD(+) synthetase	Central Metabolism	0.00331799	0.00510179	22.3572	23.2923	-0.935017	0.484764	4	4	4	12.7	12.7	12.7	35.33	0	8.3114	33526000	6	4	4	4	1	4	1	4	2	1	3	4	1	4	2	1	3	4	1	4	2	1	3	316	316	1	15	NaN	NaN	NaN	NaN
Q7V046	Putative aminopeptidase P	Basic Cellular Processes	0.0349061	0.0628993	25.6308	26.5746	-0.943805	0.326902	3	3	3	15.1	15.1	15.1	37.717	0	5.6817	21613000	7	3	3	3	1	2	1	0	2	1	2	2	1	0	2	1	2	2	1	0	2	1	2	352	352	1	8	NaN	NaN	NaN	NaN
Q7V047	Uncharacterized protein	Uncharacterized	0.0163509	0.00959165	21.7888	20.6852	0	1	13	13	13	24.4	24.4	24.4	63.319	0	44.499	209830000	36	13	13	13	1	8	9	1	8	11	11	8	9	1	8	11	11	8	9	1	8	11	11	565	565	1	49	NaN	NaN	NaN	NaN
Q7V048	Probable 30S ribosomal protein PSRP-3	Basic Cellular Processes	0.0177992	0.00729578	22.7028	21.6063	1.09641	0.494172	24	24	24	51	51	51	49.996	0	146.75	3013500000	138	24	24	24	1	16	23	11	23	22	23	16	23	11	23	22	23	16	23	11	23	22	23	441	441	1	168	NaN	NaN	NaN	NaN
Q7V049	ATP synthase subunit beta	Energy Production and Conversion	0.0130755	0.00934809	24.5733	23.934	0.639256	0.437044	1	1	1	17.3	17.3	17.3	6.0356	0.0052562	2.8055	24810000	3	1	1	1	1	1	1	1	0	1	1	1	1	1	0	1	1	1	1	1	0	1	1	52	52	1	5	NaN	NaN	NaN	NaN
Q7V051	2,3-bisphosphoglycerate-independent phosphoglycerate mutase	Central Metabolism	0.00518776	0.000993452	22.3374	20.8709	1.46649	0.444686	3	3	3	31	31	31	14.106	0	10.287	37607000	8	3	3	3	1	3	1	3	1	0	1	3	1	3	1	0	1	3	1	3	1	0	1	126	126	1	10	NaN	NaN	NaN	NaN
Q7V052	Bifunctional protein PyrR	Central Metabolism	0.0120596	0.0133389	22.9544	23.0432	-0.0888685	0.905893	15	15	15	45.3	45.3	45.3	51.98	0	96.134	832930000	90	15	15	15	1	15	13	13	13	14	14	15	13	13	13	14	14	15	13	13	13	14	14	486	486	1	105	NaN	NaN	NaN	NaN
Q7V057	Uncharacterized protein	Uncharacterized	0.0571003	0.110004	25.0474	25.8432	-0.795736	0.30576	6	6	6	13.7	13.7	13.7	60.147	0	15.451	74507000	8	6	6	6	1	6	2	2	1	2	2	6	2	2	1	2	2	6	2	2	1	2	2	540	540	1	16	NaN	NaN	NaN	NaN
Q7V060	Serine proteases, trypsin family:HtrA/DegQ protease family	Basic Cellular Processes	0.00485261	0.0033465	23.0586	22.3594	0.699158	0.400894	8	8	8	51.1	51.1	51.1	20.576	0	32.313	185050000	35	8	8	8	1	7	6	3	6	7	7	7	6	3	6	7	7	7	6	3	6	7	7	180	180	1	45	NaN	NaN	NaN	NaN
Q7V066	Conserved hypothetical	Uncharacterized	0.0506528	0.0442738	27.164	26.7228	0.441239	0.310952	8	8	8	41.8	41.8	41.8	18.075	0	23.325	1334100000	38	8	8	8	1	7	8	6	8	8	8	7	8	6	8	8	8	7	8	6	8	8	8	153	153	1	56	NaN	NaN	NaN	NaN
Q7V067	Possible UBX domain	Other	0.0209849	0.0155243	24.8033	24.1076	0.695697	0.305913	7	7	7	18.2	18.2	18.2	49.039	0	10.565	93014000	11	7	7	7	1	5	5	5	5	2	4	5	5	5	5	2	4	5	5	5	5	2	4	446	446	1	26	NaN	NaN	NaN	NaN
Q7V068	Uncharacterized protein	Uncharacterized	0.017603	0.00567587	22.5585	21.0913	1.46715	0.402351	43	43	43	72.3	72.3	72.3	75.063	0	323.31	6241100000	322	43	43	43	1	36	39	38	39	39	38	36	39	38	39	39	38	36	39	38	39	39	38	694	694	1	354	NaN	NaN	NaN	NaN
Q7V069	Conserved hypothetical	Uncharacterized	0.126112	0.178116	25.6936	25.9412	-0.247574	0.466469	13	13	13	36.8	36.8	36.8	37.205	0	42.162	451610000	44	13	13	13	1	11	11	11	12	11	12	11	11	11	12	11	12	11	11	11	12	11	12	326	326	1	68	NaN	NaN	NaN	NaN
Q7V070	Uncharacterized protein	Uncharacterized	0.595422	0.564408	28.4186	28.0955	0.323102	0.42764	5	5	5	45.5	45.5	45.5	12.617	0	23.498	41593000	9	5	5	5	1	5	0	3	0	1	0	5	0	3	0	1	0	5	0	3	0	1	0	112	112	1	13	NaN	NaN	NaN	NaN
Q7V073	Possible SRP19 protein	Membrane Transport	0.00721555	0.0128061	21.4216	21.7874	0	1	6	6	6	73.5	73.5	73.5	11.535	0	57.456	1800900000	82	6	6	6	1	4	6	5	5	5	5	4	6	5	5	5	5	4	6	5	5	5	5	102	102	1	88	NaN	NaN	NaN	NaN
Q7V074	Uncharacterized protein	Uncharacterized	0.00434898	0.00639733	21.0166	21.3815	0	1	7	7	7	54.2	54.2	54.2	15.163	0	80.337	5477600000	119	7	7	7	1	7	7	6	6	6	7	7	7	6	6	6	7	7	7	6	6	6	7	142	142	1	107	NaN	NaN	NaN	NaN
Q7V078	Uncharacterized protein	Uncharacterized	0.03529	0.00515151	23.9484	20.8974	3.05103	0.484	1	1	1	14.7	14.7	14.7	10.891	0	5.3906	19534000	6	1	1	1	1	1	1	1	0	1	1	1	1	1	0	1	1	1	1	1	0	1	1	95	95	1	7	NaN	NaN	NaN	NaN
Q7V079	Conserved hypothetical	Uncharacterized	0.285717	0.288683	26.7495	26.5262	0.223322	0.41648	2	2	2	22	22	22	13.878	0	6.5835	25907000	8	2	2	2	1	1	1	2	1	1	1	1	1	2	1	1	1	1	1	2	1	1	1	123	123	1	7	NaN	NaN	NaN	NaN
Q7V090	Uncharacterized protein	Uncharacterized	0.0349617	0.0163093	24.292	23.5988	0.693221	0.647953	2	2	2	10.1	10.1	10.1	13.419	0	36.859	37320000	3	2	2	2	1	2	2	2	0	0	0	2	2	2	0	0	0	2	2	2	0	0	0	119	119	1	6	NaN	NaN	NaN	NaN
Q7V093	Similar to dihydroflavonol-4-reductase	Central Metabolism	0.00185084	0.00232629	21.127	21.352	0	1	3	3	3	41.9	41.9	41.9	10.655	0	14.975	1274700000	42	3	3	3	1	3	3	3	3	3	3	3	3	3	3	3	3	3	3	3	3	3	3	93	93	1	39	NaN	NaN	NaN	NaN
Q7V097	Uncharacterized protein	Uncharacterized	0.0171341	0.0331297	22.0471	23.2469	-1.19981	0.42221	3	3	3	14.7	14.7	14.7	25.678	0	10.466	128390000	8	3	3	3	1	3	2	2	2	2	3	3	2	2	2	2	3	3	2	2	2	2	3	225	225	1	14	NaN	NaN	NaN	NaN
Q7V0A3	DUF209	Other	0.00399937	0.00361817	21.8041	21.4463	0	1	3	3	3	9.4	9.4	9.4	36.713	0.0065189	2.7323	1361500	4	3	3	3	1	2	0	1	1	1	0	2	0	1	1	1	0	2	0	1	1	1	0	331	331	1	5	NaN	NaN	NaN	NaN
Q7V0A9	Similar to DNA photolyase	Central Metabolism	0.00242665	0.0016723	21.7414	21.0874	0	1	4	4	4	44.6	44.6	44.6	10.782	0	11.388	70088000	14	4	4	4	1	2	3	0	1	4	3	2	3	0	1	4	3	2	3	0	1	4	3	92	92	1	13	NaN	NaN	NaN	NaN
Q7V0B3	Uncharacterized protein	Uncharacterized	0.00395821	0.00287137	21.717	21.0454	0	1	1	1	1	5.8	5.8	5.8	28.077	0	4.6048	44264000	4	1	1	1	1	1	1	0	1	1	1	1	1	0	1	1	1	1	1	0	1	1	1	243	243	1	5	NaN	NaN	NaN	NaN
Q7V0B5	D-3-phosphoglycerate dehydrogenase	Central Metabolism	0.0584322	0.109743	26.8372	27.631	-0.793845	0.279611	2	2	2	6.3	6.3	6.3	45.54	0.0013736	3.5857	33115000	2	2	2	2	1	0	0	0	1	1	0	0	0	0	1	1	0	0	0	0	1	1	0	379	379	1	2	NaN	NaN	NaN	NaN
Q7V0B8	Pentapeptide repeats	Other	0.00436965	0.00627225	21.7358	22.0317	0	1	2	2	2	9.5	9.5	9.5	30.363	0	4.1469	6208800	2	2	2	2	1	2	0	0	0	0	0	2	0	0	0	0	0	2	0	0	0	0	0	263	263	1	2	NaN	NaN	NaN	NaN
Q7V0B9	Ribonuclease Z	Basic Cellular Processes	0.0126443	0.0145999	23.3758	23.9505	-0.574692	0.727985	33	33	33	60.8	60.8	60.8	56.744	0	323.31	9180900000	262	33	33	33	1	29	32	22	32	33	32	29	32	22	32	33	32	29	32	22	32	33	32	528	528	1	289	NaN	NaN	NaN	NaN
Q7V0C0	Uncharacterized protein	Uncharacterized	0.00242503	0.00283012	21.0496	20.9946	0	1	2	2	2	22.4	22.4	22.4	20.92	0	13.997	11300000	3	2	2	2	1	1	0	2	0	0	0	1	0	2	0	0	0	1	0	2	0	0	0	192	192	1	3	NaN	NaN	NaN	NaN
Q7V0C1	50S ribosomal protein L27	Basic Cellular Processes	0.00894452	0.00744473	21.3572	21.0468	0	1	10	10	10	33	33	33	34.58	0	32.848	277730000	26	10	10	10	1	10	7	0	7	9	8	10	7	0	7	9	8	10	7	0	7	9	8	312	312	1	49	NaN	NaN	NaN	NaN
Q7V0C2	50S ribosomal protein L21	Basic Cellular Processes	0.165526	0.0812018	26.5778	25.35	1.22789	0.326533	2	2	2	15.2	15.2	15.2	25.693	0.0013812	3.6872	18750000	5	2	2	2	1	1	0	0	2	1	1	1	0	0	2	1	1	1	0	0	2	1	1	223	223	1	5	NaN	NaN	NaN	NaN
Q7V0C3	Circadian clock protein KaiB	Basic Cellular Processes	0.0380452	0.0136539	23.9374	22.2301	1.7073	0.279014	1	1	1	12.8	12.8	12.8	9.3166	0.0065531	2.7751	33592000	2	1	1	1	1	1	1	1	1	0	1	1	1	1	1	0	1	1	1	1	1	0	1	86	86	1	5	NaN	NaN	NaN	NaN
Q7V0C4	Circadian clock protein kinase KaiC	Basic Cellular Processes	0.00288977	0.001069	22.5074	20.8628	1.64458	0.338667	6	6	6	32.2	32.2	32.2	16.817	0	48.015	1032500000	39	6	6	6	1	5	6	6	6	6	4	5	6	6	6	6	4	5	6	6	6	6	4	146	146	1	44	NaN	NaN	NaN	NaN
Q7V0C5	Two-component sensor histidine kinase	Basic Cellular Processes	0.00575665	0.00264253	22.5596	22.0764	0.483197	0.864517	3	3	3	43	43	43	11.957	0	17.052	144120000	24	3	3	3	1	3	3	2	1	2	3	3	3	2	1	2	3	3	3	2	1	2	3	107	107	1	26	NaN	NaN	NaN	NaN
Q7V0C6	Phosphoribosylamine--glycine ligase	Central Metabolism	0.00969854	0.0139793	23.975	24.4025	-0.42751	0.469604	3	3	3	6.5	6.5	6.5	56.949	0	7.4528	30788000	7	3	3	3	1	3	0	2	1	2	1	3	0	2	1	2	1	3	0	2	1	2	1	509	509	1	10	NaN	NaN	NaN	NaN
Q7V0C7	Phosphoribosylaminoimidazole-succinocarboxamide synthase	Central Metabolism	0.00162753	0.00313866	20.6239	21.3741	0	1	3	3	3	3.9	3.9	3.9	77.499	0.0087829	2.1914	176790000	3	3	3	3	1	2	1	2	3	3	1	2	1	2	3	3	1	2	1	2	3	3	1	689	689	1	12	NaN	NaN	NaN	NaN
Q7V0C8	Chloroplast outer envelope membrane protein homolog	Photosynthesis	0.0901765	0.0764711	28.0128	27.5356	0.477125	0.426005	19	19	19	38.4	38.4	38.4	49.311	0	68.76	1069600000	84	19	19	19	1	16	18	9	18	19	19	16	18	9	18	19	19	16	18	9	18	19	19	445	445	1	121	NaN	NaN	NaN	NaN
Q7V0C9	UDP-3-O-acyl-N-acetylglucosamine deacetylase	Central Metabolism	0.00559034	0.0102426	22.0813	23.2906	-1.20929	0.415476	1	1	1	3.7	3.7	3.7	27.869	0.0064433	2.6188	5736500	2	1	1	1	1	1	0	1	0	0	1	1	0	1	0	0	1	1	0	1	0	0	1	242	242	1	3	NaN	NaN	NaN	NaN
Q7V0D0	3-hydroxyacyl-[acyl-carrier-protein] dehydratase FabZ	Central Metabolism	0.085926	0.0478128	25.7083	24.6057	1.1026	0.270764	46	46	46	66.9	66.9	66.9	78.848	0	323.31	16938000000	439	46	46	46	1	43	46	45	46	43	46	43	46	45	46	43	46	43	46	45	46	43	46	713	713	1	449	NaN	NaN	NaN	NaN
Q7V0D1	Acyl-[acyl-carrier-protein]--UDP-N-acetylglucosamine O-acyltransferase	Central Metabolism	0.070602	0.0197281	26.168	24.0886	2.07941	0.279592	2	2	2	8.6	8.6	8.6	30.7	0	6.8967	82754000	4	2	2	2	1	2	2	0	2	2	2	2	2	0	2	2	2	2	2	0	2	2	2	278	278	1	10	NaN	NaN	NaN	NaN
Q7V0D4	Probable cytosol aminopeptidase	Basic Cellular Processes	0.15225	0.198598	28.2284	28.3874	-0.158964	0.384096	5	5	5	34.9	34.9	34.9	16.809	0	24.43	400800000	29	5	5	5	1	5	4	5	3	3	4	5	4	5	3	3	4	5	4	5	3	3	4	152	152	1	26	NaN	NaN	NaN	NaN
Q7V0D7	Tyrosine--tRNA ligase	Basic Cellular Processes	0.0119727	0.0187791	24.1226	24.6735	-0.550927	0.479323	13	13	13	40.4	40.4	40.4	30.26	0	47.21	620100000	37	13	13	13	1	13	8	11	4	7	10	13	8	11	4	7	10	13	8	11	4	7	10	280	280	1	68	NaN	NaN	NaN	NaN
Q7V0D8	Orotidine 5-phosphate decarboxylase	Central Metabolism	0.030384	0.0338081	24.8001	24.7752	0.0248864	0.966695	33	33	33	57.6	57.6	57.6	54.028	0	303.7	20798000000	386	33	33	33	1	29	31	29	32	33	33	29	31	29	32	33	33	29	31	29	32	33	33	491	491	1	390	NaN	NaN	NaN	NaN
Q7V0E0	Uncharacterized protein	Uncharacterized	0.00359548	0.00137098	22.2449	20.6469	1.59802	0.3528	7	7	7	20.9	20.9	20.9	46.617	0	55.186	396340000	29	7	7	7	1	7	7	4	6	6	7	7	7	4	6	6	7	7	7	4	6	6	7	412	412	1	49	NaN	NaN	NaN	NaN
Q7V0E4	Putative isoamylase	Central Metabolism	0.00325767	0.00803297	22.9138	24.2119	-1.2981	0.32525	6	6	6	24.3	24.3	24.3	26.274	0	17.189	268560000	17	6	6	6	1	5	5	3	5	5	6	5	5	3	5	5	6	5	5	3	5	5	6	239	239	1	31	NaN	NaN	NaN	NaN
Q7V0E5	Bacterial histone-like DNA-binding protein	Basic Cellular Processes	4.42446	3.58994	30.6293	29.9958	0.633433	0.441583	6	6	6	22.3	22.3	22.3	38.034	0	9.7497	41002000	8	6	6	6	1	5	2	2	1	1	2	5	2	2	1	1	2	5	2	2	1	1	2	336	336	1	13	NaN	NaN	NaN	NaN
Q7V0F0	Ketol-acid reductoisomerase (NADP(+))	Central Metabolism	0.294244	0.545294	28.3813	29.2621	-0.88078	0.278739	16	16	16	29.4	29.4	29.4	77.891	0	56.055	386580000	51	16	16	16	1	4	11	1	13	13	11	4	11	1	13	13	11	4	11	1	13	13	11	677	677	1	68	NaN	NaN	NaN	NaN
Q7V0F1	ATP-dependent Clp protease proteolytic subunit 2	Basic Cellular Processes	0.0252443	0.0258414	23.5066	24.1554	-0.648766	0.743507	9	9	9	58.2	58.2	58.2	9.7682	0	60.076	23871000000	146	9	9	9	1	8	7	8	8	9	9	8	7	8	8	9	9	8	7	8	8	9	9	91	91	1	112	NaN	NaN	NaN	NaN
Q7V0F2	ATP-dependent Clp protease proteolytic subunit	Basic Cellular Processes	0.0182925	0.0156843	23.7909	23.5584	0.232537	0.805075	38	38	38	87.2	87.2	87.2	36.629	0	323.31	28930000000	463	38	38	38	1	32	33	25	35	34	38	32	33	25	35	34	38	32	33	25	35	34	38	329	329	1	473	NaN	NaN	NaN	NaN
Q7V0F6	D-alanine--D-alanine ligase	Basic Cellular Processes	0.00407802	0.00694994	22.2568	23.0738	-0.816952	0.403328	9	9	9	40.3	40.3	40.3	22.16	0	29.08	354410000	20	9	9	9	1	8	5	1	7	6	8	8	5	1	7	6	8	8	5	1	7	6	8	201	201	1	43	NaN	NaN	NaN	NaN
Q7V0F9	Uncharacterized protein	Uncharacterized	0.0295081	0.0584885	25.1281	26.5033	-1.37516	0.354038	9	9	9	47.7	47.7	47.7	24.306	0	46.094	368480000	45	9	9	9	1	9	7	6	7	7	7	9	7	6	7	7	7	9	7	6	7	7	7	220	220	1	52	NaN	NaN	NaN	NaN
Q7V0G0	Acetylornithine aminotransferase	Central Metabolism	0.00174422	0.000970385	21.1925	20.4535	0	1	9	9	9	34.4	34.4	34.4	39.975	0	19.168	143880000	33	9	9	9	1	6	6	0	6	6	7	6	6	0	6	6	7	6	6	0	6	6	7	355	355	1	35	NaN	NaN	NaN	NaN
Q7V0G2	Dihydrolipoyl dehydrogenase	Central Metabolism	0.135195	0.131512	28.0375	27.7595	0.278006	0.489336	18	18	18	49.7	49.7	49.7	50.584	0	120.89	1582300000	82	18	18	18	1	12	17	5	17	16	17	12	17	5	17	16	17	12	17	5	17	16	17	451	451	1	105	NaN	NaN	NaN	NaN
Q7V0G5	Putative nickel-containing superoxide dismutase (NISOD)	Oxidative Stress	0.225701	0.394161	26.9981	27.7239	-0.725819	0.261815	1	1	1	1.9	1.9	1.9	45.639	0.0076628	2.4416	3309900	1	1	1	1	1	0	0	0	1	0	0	0	0	0	1	0	0	0	0	0	1	0	0	415	415	1	1	NaN	NaN	NaN	NaN
Q7V0G6	Peptidyl-prolyl cis-trans isomerase	Central Metabolism	0.102216	0.0245813	26.0277	24.0032	2.02449	0.26435	32	32	32	61.4	61.4	61.4	51.448	0	323.31	11311000000	262	32	32	32	1	28	30	31	31	31	31	28	30	31	31	31	31	28	30	31	31	31	31	479	479	1	279	NaN	NaN	NaN	NaN
Q7V0G8	ADP-dependent (S)-NAD(P)H-hydrate dehydratase	Central Metabolism	0.00795051	0.0135488	23.945	24.6002	-0.655156	0.250882	11	11	11	53.8	53.8	53.8	17.493	0	133.06	7240200000	162	11	11	11	1	10	11	10	11	11	11	10	11	10	11	11	11	10	11	10	11	11	11	156	156	1	164	NaN	NaN	NaN	NaN
Q7V0H0	Pyruvate dehydrogenase E1 component subunit alpha	Central Metabolism	0.088216	0.106988	26.8775	26.9466	-0.0691319	0.894124	5	5	5	19.5	19.5	19.5	20.313	0	15.682	335150000	23	5	5	5	1	5	5	5	2	3	5	5	5	5	2	3	5	5	5	5	2	3	5	190	190	1	32	NaN	NaN	NaN	NaN
Q7V0H1	Uncharacterized protein	Uncharacterized	0.0136379	0.00828537	25.1956	24.3021	0.893459	0.332431	16	16	16	31.9	31.9	31.9	57.35	0	67.716	535400000	63	16	16	16	1	10	11	7	11	13	13	10	11	7	11	13	13	10	11	7	11	13	13	521	521	1	73	NaN	NaN	NaN	NaN
Q7V0H7	Multifunctional fusion protein	Other	0.0417544	0.0293715	26.098	25.3613	0.736712	0.263061	15	15	15	50.7	50.7	50.7	38.726	0	115.52	1301100000	63	15	15	15	1	11	13	7	11	13	13	11	13	7	11	13	13	11	13	7	11	13	13	345	345	1	81	NaN	NaN	NaN	NaN
Q7V0H8	Uncharacterized protein	Uncharacterized	0.00989276	0.00893709	22.4332	22.1502	0.283002	0.648209	7	7	7	11.5	11.5	11.5	79.938	0	23.211	260000000	15	7	7	7	1	6	4	7	3	3	3	6	4	7	3	3	3	6	4	7	3	3	3	702	702	1	29	NaN	NaN	NaN	NaN
Q7V0H9	Putative circadian phase modifier CpmA homolog	Basic Cellular Processes	0.0124555	0.00608598	23.377	22.1383	1.23867	0.280134	13	13	13	34.9	34.9	34.9	45.956	0	70.754	923190000	60	13	13	13	1	13	8	9	8	9	9	13	8	9	8	9	9	13	8	9	8	9	9	407	407	1	68	NaN	NaN	NaN	NaN
Q7V0I3	Thiamine-phosphate synthase	Central Metabolism	0.00800376	0.0130285	22.4151	23.9632	-1.54801	0.477641	2	2	2	21.6	21.6	21.6	17.592	0	4.2654	34859000	4	2	2	2	1	2	2	0	2	1	2	2	2	0	2	1	2	2	2	0	2	1	2	148	148	1	9	NaN	NaN	NaN	NaN
Q7V0I4	Riboflavin biosynthesis protein	Central Metabolism	0.0102052	0.0200079	22.6207	24.4001	-1.77942	0.420062	5	5	5	16.5	16.5	16.5	23.684	0	8.1521	59260000	9	5	5	5	1	4	2	4	1	2	3	4	2	4	1	2	3	4	2	4	1	2	3	218	218	1	16	NaN	NaN	NaN	NaN
Q7V0I6	5-nucleotidase SurE	Basic Cellular Processes	6.92154	9.5523	32.8457	33.1063	-0.26068	0.349981	9	9	9	28.2	28.2	28.2	39.599	0	46.257	228890000	34	9	9	9	1	8	8	1	5	7	9	8	8	1	5	7	9	8	8	1	5	7	9	351	351	1	44	NaN	NaN	NaN	NaN
Q7V0I7	Phenylalanine--tRNA ligase alpha subunit	Basic Cellular Processes	0.0212623	0.0389928	24.6074	25.4888	-0.881372	0.317101	11	11	11	39.4	39.4	39.4	34.305	0	37.918	441260000	51	11	11	11	1	5	11	0	11	10	9	5	11	0	11	10	9	5	11	0	11	10	9	307	307	1	62	NaN	NaN	NaN	NaN
Q7V0I8	NAD kinase 2	Central Metabolism	0.0102465	0.0205626	23.2393	24.4146	-1.17526	0.33415	14	14	14	55.4	55.4	55.4	29.571	0	72.542	46859000000	45	14	14	14	1	8	12	9	11	12	12	8	12	9	11	12	12	8	12	9	11	12	12	269	269	1	73	NaN	NaN	NaN	NaN
Q7V0I9	Putative precorrin-6y methylase	Central Metabolism	0.00343716	0.00697785	21.9632	23.3442	-1.38097	0.367354	18	18	18	51.9	51.9	51.9	38.127	0	92.787	1492800000	87	18	18	18	1	14	16	8	15	17	16	14	16	8	15	17	16	14	16	8	15	17	16	335	335	1	104	NaN	NaN	NaN	NaN
Q7V0J0	Conserved hypothetical	Uncharacterized	0.0110488	0.00356161	22.313	20.5067	1.80638	0.328	2	2	2	8.6	8.6	8.6	33.004	0	13.351	157520000	14	2	2	2	1	2	2	1	2	2	2	2	2	1	2	2	2	2	2	1	2	2	2	302	302	1	16	NaN	NaN	NaN	NaN
Q7V0J2	ATP-dependent zinc metalloprotease FtsH	Basic Cellular Processes	0.00117076	0.001205	21.3965	21.2323	0	1	9	9	9	25.6	25.6	25.6	48.897	0	44.264	170300000	35	9	9	9	1	3	6	0	6	6	9	3	6	0	6	6	9	3	6	0	6	6	9	426	426	1	36	NaN	NaN	NaN	NaN
Q7V0J3	Ornithine carbamoyltransferase	Central Metabolism	0.065263	0.121727	26.0989	27.0071	-0.908213	0.281862	3	3	3	30.8	30.8	30.8	14.394	0	7.5408	12402000	3	3	3	3	1	2	0	3	0	0	0	2	0	3	0	0	0	2	0	3	0	0	0	120	120	1	5	NaN	NaN	NaN	NaN
Q7V0J5	UDP-glucose 6-dehydrogenase	Central Metabolism	0.019126	0.0313471	24.7047	25.6451	-0.940372	0.464587	3	3	2	5.2	5.2	3.2	67.226	0	6.1216	11381000	3	3	3	2	1	1	0	3	0	0	0	1	0	3	0	0	0	0	0	2	0	0	0	620	620	1	4	NaN	NaN	NaN	NaN
Q7V0J6	Nucleoside-diphosphate-sugar epimerase	Central Metabolism	0.00570283	0.0096554	22.424	23.3685	-0.944462	0.371656	19	19	19	49.4	49.4	49.4	34.873	0	214.77	3055300000	117	19	19	19	1	17	16	16	17	17	18	17	16	16	17	17	18	17	16	16	17	17	18	308	308	1	139	NaN	NaN	NaN	NaN
Q7V0J7	Pyridoxal-phosphate-dependent aminotransferase	Central Metabolism	0.136907	0.206282	27.6996	28.1045	-0.404877	0.32759	24	24	24	53.8	53.8	53.8	53.431	0	105.96	1563000000	104	24	24	24	1	20	20	6	17	24	23	20	20	6	17	24	23	20	20	6	17	24	23	474	474	1	135	NaN	NaN	NaN	NaN
Q7V0J8	Pyridoxal-phosphate-dependent aminotransferase	Central Metabolism	0.0257742	0.010621	25.1403	23.7785	1.36181	0.258576	4	4	4	16.7	16.7	16.7	35.552	0	12.765	98497000	14	4	4	4	1	3	4	0	4	4	4	3	4	0	4	4	4	3	4	0	4	4	4	311	311	1	19	NaN	NaN	NaN	NaN
Q7V0J9	Possible dTDP-glucose 4,6-dehydratase	Central Metabolism	0.0224376	0.0365543	24.7687	25.3672	-0.598477	0.314581	28	28	28	58.2	58.2	58.2	43.598	0	154.53	8751800000	235	28	28	28	1	21	23	18	27	26	27	21	23	18	27	26	27	21	23	18	27	26	27	388	388	1	234	NaN	NaN	NaN	NaN
Q7V0K9	Uncharacterized protein	Uncharacterized	0.00241881	0.00187533	21.7582	21.3482	0.410028	0.586084	19	19	19	52.1	52.1	52.1	43.323	0	100.53	756900000	74	19	19	19	1	18	12	13	12	13	13	18	12	13	12	13	13	18	12	13	12	13	13	382	382	1	103	NaN	NaN	NaN	NaN
Q7V0L6	Methyltransferase	Central Metabolism	0.0635073	0.144704	25.4088	26.7883	-1.37954	0.284338	13	13	13	39.8	39.8	39.8	38.722	0	54.797	768980000	68	13	13	13	1	10	11	5	13	12	11	10	11	5	13	12	11	10	11	5	13	12	11	329	329	1	84	NaN	NaN	NaN	NaN
Q7V0L8	Uncharacterized protein	Uncharacterized	0.00233323	0.0020713	21.3219	21.1373	0	1	3	3	3	11.6	11.6	11.6	46.454	0	5.7141	21716000	5	3	3	3	1	1	2	1	1	2	3	1	2	1	1	2	3	1	2	1	1	2	3	397	397	1	10	NaN	NaN	NaN	NaN
Q7V0L9	Uncharacterized protein	Uncharacterized	0.261907	0.280205	27.7443	27.5903	0.154006	0.780787	15	15	15	50.2	50.2	50.2	26.436	0	69.02	3822900000	128	15	15	15	1	12	14	8	14	15	14	12	14	8	14	15	14	12	14	8	14	15	14	223	223	1	156	NaN	NaN	NaN	NaN
Q7V0M0	Uncharacterized protein	Uncharacterized	0.0203354	0.0397521	24.254	25.38	-1.12599	0.32592	2	2	2	9.3	9.3	9.3	39.637	0.0013717	3.5669	8756700	2	2	2	2	1	0	0	0	0	1	1	0	0	0	0	1	1	0	0	0	0	1	1	335	335	1	2	NaN	NaN	NaN	NaN
Q7V0M1	Possible N-terminal of transketolase	Carbon Fixation	0.0286072	0.0583965	24.7101	25.7926	-1.08248	0.280123	26	26	26	72.8	72.8	72.8	24.146	0	157.03	8406900000	247	26	26	26	1	26	26	25	26	26	26	26	26	25	26	26	26	26	26	25	26	26	26	202	202	1	275	NaN	NaN	NaN	NaN
Q7V0M2	Zinc-containing alcohol dehydrogenase superfamily	Energy Production and Conversion	0.062588	0.138369	25.8982	27.3493	-1.4511	0.288754	11	11	11	35.4	35.4	35.4	33.651	0	51.938	944110000	64	11	11	11	1	9	11	7	10	11	10	9	11	7	10	11	10	9	11	7	10	11	10	305	305	1	77	NaN	NaN	NaN	NaN
Q7V0M3	dTDP-4-dehydrorhamnose reductase	Central Metabolism	0.00162151	0.00305313	20.8159	21.5511	-0.735243	0.414	13	13	13	46.4	46.4	46.4	31.202	0	57.414	1305100000	68	13	13	13	1	10	12	6	13	12	12	10	12	6	13	12	12	10	12	6	13	12	12	276	276	1	93	NaN	NaN	NaN	NaN
Q7V0M4	Methyltransferase	Central Metabolism	0.0473315	0.104777	25.7823	27.2355	-1.45314	0.32639	29	29	29	68.8	68.8	68.8	37.266	0	292.91	5507200000	228	29	29	29	1	25	28	13	28	28	28	25	28	13	28	28	28	25	28	13	28	28	28	343	343	1	258	NaN	NaN	NaN	NaN
Q7V0M5	Conserved hypothetical	Uncharacterized	0.0394797	0.0733368	25.5055	26.2504	-0.744868	0.342	5	5	5	18.6	18.6	18.6	32.498	0	17.051	21189000	8	5	5	5	1	3	3	0	1	3	3	3	3	0	1	3	3	3	3	0	1	3	3	279	279	1	14	NaN	NaN	NaN	NaN
Q7V0M6	Dehydrogenase E1 component beta subunit	Central Metabolism	0.0796116	0.167652	26.3724	27.4763	-1.10395	0.251407	29	29	29	73.9	73.9	73.9	48.341	0	179.15	5153700000	170	29	29	29	1	21	28	9	29	28	28	21	28	9	29	28	28	21	28	9	29	28	28	418	418	1	185	NaN	NaN	NaN	NaN
Q7V0M7	Dehydrogenase, E1 component	Central Metabolism	0.0945244	0.19707	26.6347	27.7747	-1.13998	0.282225	18	18	18	51.7	51.7	51.7	34.751	0	146.19	2481100000	162	18	18	18	1	14	16	13	17	18	17	14	16	13	17	18	17	14	16	13	17	18	17	302	302	1	163	NaN	NaN	NaN	NaN
Q7V0N7	Putative nucleoside-diphosphate sugar epimerase	Central Metabolism	0.0446554	0.0639624	25.5686	26.1116	-0.542985	0.484104	11	11	11	26.5	26.5	26.5	35.129	0	85.572	2796700000	73	11	11	11	1	10	10	8	11	10	10	10	10	8	11	10	10	10	10	8	11	10	10	309	309	1	87	NaN	NaN	NaN	NaN
Q7V0N8	Bifunctional protein HldE	Central Metabolism	0.00606545	0.0107562	22.8312	24.1984	-1.36727	0.443181	22	22	22	60.8	60.8	60.8	35.821	0	188.02	7655500000	167	22	22	22	1	18	19	11	20	20	21	18	19	11	20	20	21	18	19	11	20	20	21	324	324	1	183	NaN	NaN	NaN	NaN
Q7V0N9	Putative phosphoheptose isomerase	Central Metabolism	0.0463692	0.0623465	25.1996	25.4419	-0.242324	0.370708	10	10	10	38.1	38.1	38.1	35.692	0	77.337	1351800000	61	10	10	10	1	9	8	5	9	8	10	9	8	5	9	8	10	9	8	5	9	8	10	315	315	1	64	NaN	NaN	NaN	NaN
Q7V0P0	Putative sugar-phosphate nucleotidyl transferase	Central Metabolism	0.00586568	0.0157022	21.6721	23.6838	-2.01178	0.281267	12	12	12	30.6	30.6	30.6	55.472	0	56.017	509420000	45	12	12	12	1	8	8	0	9	10	11	8	8	0	9	10	11	8	8	0	9	10	11	500	500	1	57	NaN	NaN	NaN	NaN
Q7V0P2	D,D-heptose 1,7-bisphosphate phosphatase	Central Metabolism	0.00324474	0.00443534	21.2338	21.4729	-0.239104	0.86326	8	8	8	50.7	50.7	50.7	22.543	0	55.854	832450000	44	8	8	8	1	5	6	5	8	7	7	5	6	5	8	7	7	5	6	5	8	7	7	203	203	1	50	NaN	NaN	NaN	NaN
Q7V0P6	Putative nucleotide sugar epimerase	Other	0.0353781	0.0702467	25.2937	26.3606	-1.0669	0.29774	2	2	2	10	10	10	27.143	0	6.3059	100040000	12	2	2	2	1	2	2	0	2	2	2	2	2	0	2	2	2	2	2	0	2	2	2	239	239	1	13	NaN	NaN	NaN	NaN
Q7V0P7	UDP-glucose-4-epimerase	Central Metabolism	0.0295821	0.05811	25.2068	26.1594	-0.952676	0.28126	2	2	2	5.6	5.6	5.6	24.726	0	4.8682	28166000	8	2	2	2	1	2	1	1	2	1	2	2	1	1	2	1	2	2	1	1	2	1	2	216	216	1	9	NaN	NaN	NaN	NaN
Q7V0P8	GDP-mannose 4,6-dehydratase	Central Metabolism	0.0299957	0.0618521	24.7704	26.2443	-1.47386	0.34608	18	18	18	67.4	67.4	67.4	38.514	0	153.39	2324800000	122	18	18	18	1	11	15	5	16	17	18	11	15	5	16	17	18	11	15	5	16	17	18	341	341	1	129	NaN	NaN	NaN	NaN
Q7V0P9	GDP-L-fucose synthase	Central Metabolism	0.00659108	0.0112099	22.6583	23.6121	-0.95378	0.416152	14	14	14	33.9	33.9	33.9	41.307	0	37.4	639710000	47	14	14	14	1	7	13	2	12	12	13	7	13	2	12	12	13	7	13	2	12	12	13	363	363	1	67	NaN	NaN	NaN	NaN
Q7V0Q1	NDP-hexose 3,4-dehydratase	Central Metabolism	0.0881003	0.156472	26.8909	27.7455	-0.854577	0.313284	15	15	15	51.8	51.8	51.8	40.893	0	150.27	2433800000	105	15	15	15	1	12	14	5	13	15	15	12	14	5	13	15	15	12	14	5	13	15	15	357	357	1	117	NaN	NaN	NaN	NaN
Q7V0Q2	Glucose-1-phosphate cytidylyltransferase	Central Metabolism	0.0427068	0.0810979	25.1199	26.1381	-1.01814	0.329894	7	7	7	24.6	24.6	24.6	35.864	0	22.083	196080000	27	7	7	7	1	4	6	1	6	6	7	4	6	1	6	6	7	4	6	1	6	6	7	317	317	1	31	NaN	NaN	NaN	NaN
Q7V0Q3	CDP-glucose 4,6-dehydratase	Central Metabolism	0.025231	0.0402692	24.9818	25.6388	-0.656993	0.372415	22	22	22	50.4	50.4	50.4	45.151	0	275.53	10281000000	221	22	22	22	1	22	22	20	22	22	22	22	22	20	22	22	22	22	22	20	22	22	22	399	399	1	215	NaN	NaN	NaN	NaN
Q7V0Q4	Possible nucleoside-diphosphate-sugar epimerase	Other	0.00630857	0.0116719	22.2122	23.5109	-1.29874	0.417052	16	16	16	53.7	53.7	53.7	29.166	0	95.671	2178200000	89	16	16	16	1	12	14	7	15	16	15	12	14	7	15	16	15	12	14	7	15	16	15	255	255	1	105	NaN	NaN	NaN	NaN
Q7V0Q5	Putative CDP-tyvelose-2-epimerase (RfbE)	Other	0.0130526	0.0281257	23.1541	25.0769	-1.92288	0.391942	18	18	18	49.7	49.7	49.7	41.706	0	97.117	1266500000	92	18	18	18	1	16	17	8	17	18	18	16	17	8	17	18	18	16	17	8	17	18	18	360	360	1	112	NaN	NaN	NaN	NaN
Q7V0R0	GDP-mannose pyrophosphorylase	Central Metabolism	0.0113747	0.0105104	24.1701	23.9436	0.226496	0.868258	7	7	7	31.7	31.7	31.7	32.149	0	34.786	151720000	26	7	7	7	1	4	6	0	5	7	6	4	6	0	5	7	6	4	6	0	5	7	6	284	284	1	35	NaN	NaN	NaN	NaN
Q7V0R1	Uncharacterized protein	Uncharacterized	0.00239209	0.00336408	20.8754	21.3208	0	1	20	20	20	62.8	62.8	62.8	39.867	0	101.72	1055400000	82	20	20	20	1	13	14	1	18	18	19	13	14	1	18	18	19	13	14	1	18	18	19	349	349	1	106	NaN	NaN	NaN	NaN
Q7V0R4	CysQ protein homolog	Other	0.0821918	0.0328606	26.5836	25.0986	1.48508	0.258233	18	18	18	41.9	41.9	41.9	54.797	0	59.363	533190000	59	18	18	18	1	17	15	4	7	14	16	17	15	4	7	14	16	17	15	4	7	14	16	485	485	1	81	NaN	NaN	NaN	NaN
Q7V0R5	Polyribonucleotide nucleotidyltransferase	Basic Cellular Processes	0.0783197	0.0241926	27.5764	25.8734	1.70296	0.275299	2	2	2	11	11	11	25.316	0.0076825	2.5314	22680000	1	2	2	2	1	0	1	1	1	0	0	0	1	1	1	0	0	0	1	1	1	0	0	218	218	1	3	NaN	NaN	NaN	NaN
Q7V0R7	Serine--tRNA ligase	Basic Cellular Processes	0.0154381	0.0287008	23.8064	25.3741	-1.56769	0.441324	13	13	13	43.1	43.1	43.1	35.752	0	83.134	969500000	49	13	13	13	1	13	9	12	6	8	10	13	9	12	6	8	10	13	9	12	6	8	10	313	313	1	72	NaN	NaN	NaN	NaN
Q7V0S2	Uncharacterized protein	Uncharacterized	0.232772	0.0859975	27.3771	25.8201	1.55697	0.336211	51	51	51	65.2	65.2	65.2	78.667	0	323.31	8721800000	334	51	51	51	1	49	37	49	34	40	42	49	37	49	34	40	42	49	37	49	34	40	42	721	721	1	402	NaN	NaN	NaN	NaN
Q7V0S3	Chorismate mutase AroH	Central Metabolism	0.00522018	0.00601387	20.9734	21.3374	0	1	20	20	20	43.2	43.2	43.2	48.081	0	323.31	1037600000	82	20	20	20	1	15	16	3	15	18	16	15	16	3	15	18	16	15	16	3	15	18	16	424	424	1	98	NaN	NaN	NaN	NaN
Q7V0S4	Signal peptide peptidase SppA (Protease IV)	Membrane Transport	0.00211688	0.00139658	21.1494	20.3653	0	1	14	14	14	57.6	57.6	57.6	22.215	0	86.626	2378100000	79	14	14	14	1	14	11	14	11	10	11	14	11	14	11	10	11	14	11	14	11	10	11	191	191	1	104	NaN	NaN	NaN	NaN
Q7V0S6	Glycosyl transferases group 1	Central Metabolism	0.0029562	0.00429458	21.8053	22.4134	-0.608076	0.513745	1	1	1	15	15	15	14.285	0	7.2384	59086000	5	1	1	1	1	1	1	1	0	1	1	1	1	1	0	1	1	1	1	1	0	1	1	127	127	1	9	NaN	NaN	NaN	NaN
Q7V0S9	Uncharacterized protein	Uncharacterized	0.016917	0.00791395	22.1422	21.0036	1.13863	0.367378	2	2	2	7.4	7.4	7.4	29.686	0.0013441	3.2471	7309500	5	2	2	2	1	1	0	0	1	1	2	1	0	0	1	1	2	1	0	0	1	1	2	269	269	1	5	NaN	NaN	NaN	NaN
Q7V0T2	Flavodoxin	Oxidative Stress	6.77291	7.32454	32.1917	32.092	0.0996977	0.838304	5	5	5	14.8	14.8	14.8	40.487	0	18.963	59922000	19	5	5	5	1	3	4	0	4	5	3	3	4	0	4	5	3	3	4	0	4	5	3	364	364	1	19	NaN	NaN	NaN	NaN
Q7V0T3	Uncharacterized protein	Uncharacterized	0.0519564	0.077181	25.3349	25.8097	-0.474806	0.443459	2	2	2	29.7	29.7	29.7	8.6069	0	8.3353	31199000	10	2	2	2	1	1	1	2	1	1	1	1	1	2	1	1	1	1	1	2	1	1	1	74	74	1	13	NaN	NaN	NaN	NaN
Q7V0T6	Macrophage migration inhibitory factor family	Basic Cellular Processes	0.290357	0.211967	27.0174	26.2948	0.722582	0.275824	23	23	23	81	81	81	18.892	0	323.31	113590000000	687	23	23	23	1	23	22	23	23	23	23	23	22	23	23	23	23	23	22	23	23	23	23	174	174	1	583	NaN	NaN	NaN	NaN
Q7V0T7	Uncharacterized protein	Uncharacterized	0.0705471	0.0674503	25.2041	24.8829	0.321202	0.471302	16	16	16	60.6	60.6	60.6	25.372	0	125.9	1760800000	82	16	16	16	1	9	13	6	13	15	14	9	13	6	13	15	14	9	13	6	13	15	14	216	216	1	105	NaN	NaN	NaN	NaN
Q7V0T8	Glycine--tRNA ligase alpha subunit	Basic Cellular Processes	0.0303479	0.0453152	24.886	25.4888	-0.602772	0.442834	4	4	4	28.2	28.2	28.2	12.593	0	28.505	1255600000	35	4	4	4	1	4	4	4	4	4	4	4	4	4	4	4	4	4	4	4	4	4	4	110	110	1	57	NaN	NaN	NaN	NaN
Q7V0T9	Putative iron ABC transporter, substrate binding protein	Membrane Transport	27.7672	27.0356	35.2207	34.9464	0.274246	0.562045	7	7	7	45.7	45.7	45.7	14.087	0	29.672	696590000	46	7	7	7	1	6	6	6	7	7	7	6	6	6	7	7	7	6	6	6	7	7	7	129	129	1	48	NaN	NaN	NaN	NaN
Q7V0U0	Uncharacterized protein	Uncharacterized	0.00979121	0.00905776	24.5704	24.202	0.368474	0.512654	15	15	15	61.9	61.9	61.9	33.89	0	93.678	1437000000	82	15	15	15	1	12	15	6	13	15	14	12	15	6	13	15	14	12	15	6	13	15	14	289	289	1	109	NaN	NaN	NaN	NaN
Q7V0U2	Cobyric acid synthase	Central Metabolism	0.00143158	0.00156402	21.1838	21.4107	-0.22694	0.847904	60	60	60	86.8	86.8	86.8	38.209	0	323.31	1259900000000	3124	60	60	60	1	56	56	56	56	59	58	56	56	56	56	59	58	56	56	56	56	59	58	340	340	1	2422	NaN	NaN	NaN	NaN
Q7V0U3	Maf-like protein PMM1159	Other	0.00672772	0.017554	21.8126	23.6508	-1.83819	0.25869	7	7	7	17.3	17.3	17.3	68.493	0	35.848	251690000	29	7	7	7	1	5	7	5	4	6	5	5	7	5	4	6	5	5	7	5	4	6	5	602	602	1	32	NaN	NaN	NaN	NaN
Q7V0U8	Acetolactate synthase small subunit	Central Metabolism	0.0119554	0.00351761	22.735	20.9053	1.82979	0.302961	5	5	5	12.8	12.8	12.8	57.57	0	17.153	28824000	6	5	5	5	1	4	1	0	0	2	4	4	1	0	0	2	4	4	1	0	0	2	4	509	509	1	12	NaN	NaN	NaN	NaN
Q7V0V0	Putative chaperon-like protein for quinone binding in photosystem II	Photosynthesis	0.00248975	0.00237127	21.6873	21.3266	0	1	3	3	3	24.5	24.5	24.5	23.536	0	12.83	102070000	12	3	3	3	1	1	2	0	3	3	3	1	2	0	3	3	3	1	2	0	3	3	3	208	208	1	14	NaN	NaN	NaN	NaN
Q7V0V1	Translation initiation factor IF-1	Basic Cellular Processes	0.00617745	0.007857	21.0483	21.0238	0	1	4	4	4	29.9	29.9	29.9	19.072	0	16.906	32535000	6	4	4	4	1	4	0	2	1	1	0	4	0	2	1	1	0	4	0	2	1	1	0	174	174	1	9	NaN	NaN	NaN	NaN
Q7V0V2	Thioredoxin reductase	Oxidative Stress	0.00670943	0.00525304	23.5195	22.9995	0.519999	0.470235	2	2	2	6.6	6.6	6.6	36.404	0.010013	2.1544	0	2	2	2	2	1	1	0	0	1	0	0	1	0	0	1	0	0	1	0	0	1	0	0	320	320	1	2	NaN	NaN	NaN	NaN
Q7V0V5	Putative nicotinamide nucleotide transhydrogenase, subunit alpha 1 (A1)	Central Metabolism	0.0697435	0.124382	26.2118	27.328	-1.11621	0.414746	2	2	2	25	25	25	9.735	0	8.4155	12655000	3	2	2	2	1	2	0	1	0	0	0	2	0	1	0	0	0	2	0	1	0	0	0	88	88	1	3	NaN	NaN	NaN	NaN
Q7V0W0	1-deoxy-D-xylulose 5-phosphate reductoisomerase	Central Metabolism	0.00677407	0.0113934	23.2586	23.9584	-0.699825	0.39818	8	8	8	24.2	24.2	24.2	50.068	0	41.881	229030000	28	8	8	8	1	7	5	6	6	8	7	7	5	6	6	8	7	7	5	6	6	8	7	458	458	1	50	NaN	NaN	NaN	NaN
Q7V0W1	Cysteine--tRNA ligase	Basic Cellular Processes	0.00439483	0.00197904	22.2209	21.542	0.678942	0.755758	33	33	33	85.9	85.9	85.9	39.873	0	233.84	6803900000	240	33	33	33	1	26	31	13	31	30	33	26	31	13	31	30	33	26	31	13	31	30	33	376	376	1	269	NaN	NaN	NaN	NaN
Q7V0W2	DNA polymerase I	Basic Cellular Processes	0.00492487	0.00968509	23.6539	25.02	-1.36619	0.402963	5	5	5	15.3	15.3	15.3	44.275	0	16.899	138370000	19	5	5	5	1	4	4	0	4	5	4	4	4	0	4	5	4	4	4	0	4	5	4	404	404	1	21	NaN	NaN	NaN	NaN
Q7V0W4	Ribosome-binding ATPase YchF	Basic Cellular Processes	0.00537834	0.00882492	22.6344	23.4594	-0.824979	0.429108	5	5	5	11.8	11.8	11.8	56.872	0	21.178	68843000	10	5	5	5	1	4	3	1	2	3	5	4	3	1	2	3	5	4	3	1	2	3	5	492	492	1	18	NaN	NaN	NaN	NaN
Q7V0W8	Uncharacterized protein	Uncharacterized	0.00537762	0.0102774	22.8579	24.3216	-1.46365	0.420145	15	15	15	18.3	18.3	18.3	110.79	0	55.046	351890000	41	15	15	15	1	11	11	1	12	12	13	11	11	1	12	12	13	11	11	1	12	12	13	976	976	1	63	NaN	NaN	NaN	NaN
Q7V0W9	Uncharacterized protein	Uncharacterized	0.0112364	0.0083334	21.8204	21.1305	0	1	6	6	6	31.4	31.4	31.4	39.944	0	31.703	165460000	22	6	6	6	1	5	4	0	5	6	6	5	4	0	5	6	6	5	4	0	5	6	6	363	363	1	27	NaN	NaN	NaN	NaN
Q7V0X5	Adenine phosphoribosyltransferase	Central Metabolism	0.0118998	0.0268451	22.7431	23.9727	-1.22959	0.256198	13	13	13	28.7	28.7	28.7	65.458	0	66.229	333990000	46	13	13	13	1	7	6	1	9	12	10	7	6	1	9	12	10	7	6	1	9	12	10	567	567	1	55	NaN	NaN	NaN	NaN
Q7V0X6	Possible porin	Membrane Transport	0.188471	0.121187	28.1579	27.2993	0.858661	0.278694	1	1	1	12	12	12	9.3617	0.0013699	3.5354	15713000	1	1	1	1	1	1	1	1	0	0	0	1	1	1	0	0	0	1	1	1	0	0	0	83	83	1	3	NaN	NaN	NaN	NaN
Q7V0X8	Possible porin	Membrane Transport	0.00446203	0.00354899	22.658	21.9301	0.727918	0.518818	8	8	8	40.9	40.9	40.9	19.114	0	30.509	361340000	45	8	8	8	1	6	5	2	7	6	8	6	5	2	7	6	8	6	5	2	7	6	8	171	171	1	51	NaN	NaN	NaN	NaN
Q7V0Y1	Two-component response regulator	Other	0.00247472	0.00235979	21.2711	20.7499	0	1	5	5	5	9.4	9.4	9.4	38.864	0	90.224	1918900000	40	NaN	NaN	NaN	2	3	4	4	4	4	5	3	4	4	4	4	5	3	4	4	4	4	5	381	NaN	1	37	NaN	NaN	NaN	NaN
Q7V0Y3	Glutaredoxin	Oxidative Stress	0.00977586	0.00644964	21.9991	21.2113	0	1	1	1	1	5	5	5	38.444	0	6.7834	51773000	5	1	1	1	1	1	1	1	1	1	1	1	1	1	1	1	1	1	1	1	1	1	1	380	380	1	9	NaN	NaN	NaN	NaN
Q7V0Y5	Uncharacterized protein	Uncharacterized	0.117305	0.0993829	26.4843	25.994	0.490326	0.306353	10	10	10	52.7	52.7	52.7	26.549	0	37.997	114010000	13	10	10	10	1	10	0	1	0	1	0	10	0	1	0	1	0	10	0	1	0	1	0	245	245	1	13	NaN	NaN	NaN	NaN
Q7V0Y7	Pyridoxine 5-phosphate synthase	Central Metabolism	0.152245	0.172849	27.1993	27.1418	0.0575008	0.850117	1	1	1	14	14	14	12.034	0	4.5493	8226600	1	1	1	1	1	1	0	1	0	1	1	1	0	1	0	1	1	1	0	1	0	1	1	107	107	1	5	NaN	NaN	NaN	NaN
Q7V0Y8	Uncharacterized protein	Uncharacterized	0.0969803	0.137421	25.3614	25.6329	-0.271428	0.361818	10	10	10	47.6	47.6	47.6	20.83	0	47.649	932950000	46	10	10	10	1	7	7	6	6	7	10	7	7	6	6	7	10	7	7	6	6	7	10	187	187	1	54	NaN	NaN	NaN	NaN
Q7V0Z4	Uncharacterized protein	Uncharacterized	0.00557477	0.0138211	21.0559	22.0214	0	1	24	24	24	64.7	64.7	64.7	26.666	0	323.31	8995100000	262	24	24	24	1	22	21	23	22	23	24	22	21	23	22	23	24	22	21	23	22	23	24	238	238	1	273	NaN	NaN	NaN	NaN
Q7V0Z7	Recombination protein RecR	Basic Cellular Processes	0.00310953	0.00551121	20.9443	21.6205	0	1	9	9	9	61	61	61	12.256	0	45.729	790470000	47	9	9	9	1	9	7	6	8	8	7	9	7	6	8	8	7	9	7	6	8	8	7	105	105	1	59	NaN	NaN	NaN	NaN
Q7V104	Diaminopimelate decarboxylase	Central Metabolism	0.0842394	0.126178	27.1798	27.6306	-0.450793	0.315602	1	1	1	12	12	12	10.659	0.0099875	2.1044	4877000	2	1	1	1	1	1	0	1	0	0	0	1	0	1	0	0	0	1	0	1	0	0	0	92	92	1	2	NaN	NaN	NaN	NaN
Q7V106	ClpC	Basic Cellular Processes	0.00472405	0.000474025	23.105	20.4101	2.69486	0.273304	4	4	4	16.6	16.6	16.6	22.226	0	5.5271	8633400	3	4	4	4	1	2	1	1	1	0	0	2	1	1	1	0	0	2	1	1	1	0	0	199	199	1	5	NaN	NaN	NaN	NaN
Q7V108	Orn/Lys/Arg decarboxylases family 1	Central Metabolism	0.00177275	0.00231989	21.5558	21.699	0	1	39	39	39	83.2	83.2	83.2	50.648	0	277.62	10115000000	332	39	39	39	1	31	37	24	36	37	35	31	37	24	36	37	35	31	37	24	36	37	35	457	457	1	317	NaN	NaN	NaN	NaN
Q7V110	4-alpha-glucanotransferase	Central Metabolism	0.00958771	0.016441	23.5729	24.7574	-1.18446	0.478119	25	25	23	36.8	36.8	35	93.426	0	136.09	252870000	45	25	25	23	1	25	4	10	4	4	4	25	4	10	4	4	4	23	3	9	4	3	3	842	842	1	54	NaN	NaN	NaN	NaN
Q7V111	Ribose-phosphate pyrophosphokinase	Central Metabolism	0.00160315	0.00300998	21.0942	21.6604	0	1	3	3	3	6.2	6.2	6.2	52.561	0.001387	3.7443	60732000	6	3	3	3	1	1	2	0	2	3	3	1	2	0	2	3	3	1	2	0	2	3	3	465	465	1	11	NaN	NaN	NaN	NaN
Q7V113	Adaptive-response sensory-kinase SasA	Basic Cellular Processes	0.00177685	0.00131955	21.1488	20.7312	0	1	19	19	19	44.1	44.1	44.1	59.327	0	78.306	750390000	87	19	19	19	1	14	17	2	17	19	17	14	17	2	17	19	17	14	17	2	17	19	17	506	506	1	106	NaN	NaN	NaN	NaN
Q7V115	Ferredoxin-NADP oxidoreductase (FNR)	Photosynthesis	0.153397	0.120537	27.8557	27.2211	0.634623	0.275908	3	3	3	16.9	16.9	16.9	36.252	0	7.7739	19407000	4	3	3	3	1	2	1	1	3	0	0	2	1	1	3	0	0	2	1	1	3	0	0	331	331	1	7	NaN	NaN	NaN	NaN
Q7V116	Glucose-6-phosphate 1-dehydrogenase	Central Metabolism	0.0127967	0.0297028	24.2529	25.6936	-1.44069	0.28725	2	2	2	6.2	6.2	6.2	42.571	0	12.314	8970700	3	2	2	2	1	2	0	1	0	0	0	2	0	1	0	0	0	2	0	1	0	0	0	372	372	1	3	NaN	NaN	NaN	NaN
Q7V117	Putative glucose 6-phosphate dehydrogenase effector OpcA	Central Metabolism	0.0198348	0.0354301	24.8467	25.7211	-0.874428	0.331467	23	23	23	66.5	66.5	66.5	41.713	0	167.65	5990600000	233	23	23	23	1	21	19	22	18	19	21	21	19	22	18	19	21	21	19	22	18	19	21	370	370	1	269	NaN	NaN	NaN	NaN
Q7V119	Polyprenyl synthetase	Central Metabolism	0.00706035	0.0065243	22.7542	22.4242	0.330036	0.842159	31	31	31	65.9	65.9	65.9	57.963	0	207.73	2295800000	158	31	31	31	1	23	24	8	30	29	29	23	24	8	30	29	29	23	24	8	30	29	29	507	507	1	183	NaN	NaN	NaN	NaN
Q7V121	2-isopropylmalate synthase	Central Metabolism	0.00496733	0.00235235	23.0124	22.1097	0.902704	0.445761	11	11	11	29.3	29.3	29.3	48.556	0	50.028	887100000	54	11	11	11	1	8	9	6	10	10	10	8	9	6	10	10	10	8	9	6	10	10	10	433	433	1	60	NaN	NaN	NaN	NaN
Q7V124	DNA gyrase subunit A	Basic Cellular Processes	0.00396951	0.00353644	23.3961	23.3722	0.0238876	0.987486	8	8	8	29.7	29.7	29.7	32.424	0	23.466	115060000	23	8	8	8	1	8	4	2	2	3	5	8	4	2	2	3	5	8	4	2	2	3	5	300	300	1	31	NaN	NaN	NaN	NaN
Q7V125	Putative IMP dehydrogenase	Central Metabolism	0.298888	0.266148	28.8734	28.4641	0.40928	0.414142	13	13	13	29.5	29.5	29.5	59.246	0	72.906	180990000	24	13	13	13	1	13	8	6	4	6	5	13	8	6	4	6	5	13	8	6	4	6	5	546	546	1	48	NaN	NaN	NaN	NaN
Q7V126	Thioredoxin	Oxidative Stress	0.638415	0.242539	28.0385	26.4596	1.57891	0.323862	25	25	25	34.4	34.4	34.4	96.573	0	106.71	552090000	68	25	25	25	1	25	13	6	17	20	18	25	13	6	17	20	18	25	13	6	17	20	18	867	867	1	104	NaN	NaN	NaN	NaN
Q7V127	Imidazole glycerol phosphate synthase subunit HisH	Central Metabolism	0.0119793	0.0187223	23.2803	23.7102	-0.429925	0.270545	38	38	38	84	84	84	40.999	0	323.31	26424000000	447	38	38	38	1	37	36	36	38	38	38	37	36	36	38	38	38	37	36	36	38	38	38	387	387	1	449	NaN	NaN	NaN	NaN
Q7V132	Crossover junction endodeoxyribonuclease RuvC	Basic Cellular Processes	0.00817239	0.0084893	22.0433	22.1489	-0.105586	0.932046	10	10	10	76.6	76.6	76.6	11.61	0	169.04	3727900000	90	10	10	10	1	9	8	10	7	8	8	9	8	10	7	8	8	9	8	10	7	8	8	107	107	1	103	NaN	NaN	NaN	NaN
Q7V133	5-formyltetrahydrofolate cyclo-ligase	Central Metabolism	0.00453412	0.00828564	21.616	22.3855	-0.769483	0.278737	5	5	5	27.8	27.8	27.8	22.921	0	20.062	170320000	17	5	5	5	1	3	5	2	5	5	5	3	5	2	5	5	5	3	5	2	5	5	5	205	205	1	26	NaN	NaN	NaN	NaN
Q7V134	Uncharacterized protein	Uncharacterized	0.0341845	0.0222926	24.2671	23.4294	0.837702	0.277858	4	4	4	25.5	25.5	25.5	17.397	0	14.641	68832000	11	4	4	4	1	3	3	1	3	3	4	3	3	1	3	3	4	3	3	1	3	3	4	157	157	1	18	NaN	NaN	NaN	NaN
Q7V135	Homoserine dehydrogenase	Central Metabolism	0.0278587	0.0535343	25.1533	26.3148	-1.1615	0.342807	4	4	4	25.9	25.9	25.9	21.746	0	10.183	55869000	16	4	4	4	1	4	3	0	3	3	3	4	3	0	3	3	3	4	3	0	3	3	3	185	185	1	17	NaN	NaN	NaN	NaN
Q7V137	ABC transporter, substrate binding protein, possibly oligopeptides	Membrane Transport	0.00183837	0.00135498	21.9681	21.2371	0.731046	0.276773	10	10	10	57.4	57.4	57.4	16.058	0	44.939	295020000	44	10	10	10	1	8	7	8	7	9	8	8	7	8	7	9	8	8	7	8	7	9	8	141	141	1	56	NaN	NaN	NaN	NaN
Q7V139	Uncharacterized protein	Uncharacterized	0.00693878	0.00113028	23.5648	20.9715	2.59325	0.314476	18	18	18	40.6	40.6	40.6	46.956	0	101.47	1686700000	87	18	18	18	1	11	16	6	15	17	16	11	16	6	15	17	16	11	16	6	15	17	16	433	433	1	117	NaN	NaN	NaN	NaN
Q7V146	Transglutaminase-like superfamily	Central Metabolism	0.00188634	0.00175	21.0176	20.7787	0	1	2	2	2	6.1	6.1	6.1	58.65	0	4.1095	22361000	4	2	2	2	1	2	1	2	1	1	1	2	1	2	1	1	1	2	1	2	1	1	1	523	523	1	8	NaN	NaN	NaN	NaN
Q7V152	G-protein beta WD-40 repeats	Other	0.00363388	0.00604485	21.7625	22.886	-1.12347	0.445122	12	12	12	27.9	27.9	27.9	59.461	0	40.021	132000000	22	12	12	12	1	12	5	9	2	4	3	12	5	9	2	4	3	12	5	9	2	4	3	520	520	1	37	NaN	NaN	NaN	NaN
Q7V153	Cobalamin synthesis protein/P47K	Central Metabolism	0.045782	0.0994916	26.1158	27.2702	-1.15436	0.275243	2	2	2	9.8	9.8	9.8	32.371	0	13.337	16695000	5	2	2	2	1	2	2	0	1	2	1	2	2	0	1	2	1	2	2	0	1	2	1	286	286	1	8	NaN	NaN	NaN	NaN
Q7V154	ABC transporter, substrate binding protein, possibly Mn	Membrane Transport	0.0846166	0.0581924	27.3303	26.5639	0.766468	0.266419	4	4	4	10.6	10.6	10.6	38.24	0	9.0543	96330000	14	4	4	4	1	3	4	0	4	4	3	3	4	0	4	4	3	3	4	0	4	4	3	357	357	1	22	NaN	NaN	NaN	NaN
Q7V160	Putative stress-induced protein OsmC	Basic Cellular Processes	0.00982496	0.0147692	22.3122	22.7552	-0.442975	0.628125	31	31	31	65.5	65.5	65.5	51.155	0	323.31	10278000000	305	31	31	31	1	24	27	18	30	30	31	24	27	18	30	30	31	24	27	18	30	30	31	452	452	1	314	NaN	NaN	NaN	NaN
Q7V176	Uncharacterized protein	Uncharacterized	0.0398908	0.00172462	24.2388	20.3031	3.93562	0.260193	19	19	19	30.7	30.7	30.7	52.261	0	103.19	4285100000	123	19	19	19	1	18	17	19	17	16	17	18	17	19	17	16	17	18	17	19	17	16	17	473	473	1	145	NaN	NaN	NaN	NaN
Q7V177	Glutathione peroxidase	Oxidative Stress	0.0650535	0.151009	25.398	26.445	-1.04707	0.5808	4	4	4	38.5	38.5	38.5	15.214	0	14.903	69961000	8	4	4	4	1	4	2	2	4	3	4	4	2	2	4	3	4	4	2	2	4	3	4	135	135	1	19	NaN	NaN	NaN	NaN
Q7V179	Formate-dependent phosphoribosylglycinamide formyltransferase	Central Metabolism	0.0147701	0.0243688	23.8441	25.0283	-1.1842	0.452319	1	1	1	53.4	53.4	53.4	25.481	0	9.0967	86169000	5	1	1	1	1	1	1	1	0	0	0	1	1	1	0	0	0	1	1	1	0	0	0	223	223	1	5	NaN	NaN	NaN	NaN
Q7V180	Probable aminopeptidase N	Basic Cellular Processes	0.00432136	0.00509425	23.8162	23.9199	-0.103663	0.842268	6	6	6	43.5	43.5	43.5	18.947	0	37.568	1025400000	47	6	6	6	1	6	6	6	6	6	6	6	6	6	6	6	6	6	6	6	6	6	6	170	170	1	52	NaN	NaN	NaN	NaN
Q7V186	Uncharacterized protein	Uncharacterized	0.195201	0.219532	26.3619	26.3058	0.0560258	0.898569	11	11	11	34.1	34.1	34.1	43.723	0	63.83	502870000	57	11	11	11	1	7	10	1	11	11	11	7	10	1	11	11	11	7	10	1	11	11	11	390	390	1	65	NaN	NaN	NaN	NaN
Q7V190	Conserved hypotheticcal protein	Uncharacterized	0.0771483	0.0660819	25.3967	24.9274	0.469327	0.256115	15	15	15	19	19	19	102.56	0	41.52	234190000	40	15	15	15	1	7	12	4	10	12	12	7	12	4	10	12	12	7	12	4	10	12	12	869	869	1	64	NaN	NaN	NaN	NaN
Q7V194	Conserved hypothetical	Uncharacterized	0.0189023	0.020612	23.5346	23.3823	0.152295	0.786766	7	7	7	86.7	86.7	86.7	12.25	0	85.095	3044700000	134	7	7	7	1	6	7	6	6	6	7	6	7	6	6	6	7	6	7	6	6	6	7	105	105	1	128	NaN	NaN	NaN	NaN
Q7V199	Uncharacterized protein	Uncharacterized	0.0909098	0.0308857	24.6605	22.9925	1.66804	0.336324	13	13	13	73.9	73.9	73.9	15.363	0	57.508	958690000	71	13	13	13	1	10	11	12	10	12	13	10	11	12	10	12	13	10	11	12	10	12	13	134	134	1	101	NaN	NaN	NaN	NaN
Q7V1A5	Putative ATP-binding subunit of urea ABC transport system	Membrane Transport	0.00188969	0.00257323	20.7073	20.8769	0	1	6	6	6	37	37	37	18.002	0	18.149	142440000	23	6	6	6	1	6	5	2	4	6	5	6	5	2	4	6	5	6	5	2	4	6	5	154	154	1	28	NaN	NaN	NaN	NaN
Q7V1A9	Putative urea ABC transporter, substrate binding protein	Membrane Transport	0.018082	0.0175212	24.9983	24.7211	0.277126	0.60373	4	4	4	40	40	40	8.4647	0	11.674	207240000	21	4	4	4	1	4	4	4	4	4	4	4	4	4	4	4	4	4	4	4	4	4	4	75	75	1	24	NaN	NaN	NaN	NaN
Q7V1B0	Urease accessory protein UreG	Central Metabolism	0.0188545	0.0308114	23.7264	24.4083	-0.681903	0.329573	1	1	1	7.2	7.2	7.2	26.092	0	22.283	0	1	1	1	1	1	0	0	0	0	0	1	0	0	0	0	0	1	0	0	0	0	0	1	236	236	1	1	NaN	NaN	NaN	NaN
Q7V1B1	Urease accessory protein UreF	Central Metabolism	0.00255336	0.00243334	21.1951	20.9015	0	1	11	11	11	44.6	44.6	44.6	47.6	0	88.958	575190000	73	11	11	11	1	8	8	10	9	8	9	8	8	10	9	8	9	8	8	10	9	8	9	439	439	1	78	NaN	NaN	NaN	NaN
Q7V1B2	Urease accessory protein UreE	Central Metabolism	0.0126848	0.0189888	22.1703	23.327	-1.15668	0.485159	8	8	8	45.3	45.3	45.3	21.78	0	69.963	281070000	26	8	8	8	1	5	8	4	7	8	7	5	8	4	7	8	7	5	8	4	7	8	7	201	201	1	39	NaN	NaN	NaN	NaN
Q7V1B3	Urease accessory protein UreD	Central Metabolism	0.00234486	0.00500183	21.114	22.3398	-1.22577	0.303901	2	2	2	7.5	7.5	7.5	26.682	0.0013831	3.6893	4454900	6	2	2	2	1	0	1	0	1	2	2	0	1	0	1	2	2	0	1	0	1	2	2	228	228	1	6	NaN	NaN	NaN	NaN
Q7V1B4	Urease subunit gamma	Central Metabolism	0.00600359	0.00634618	21.1372	21.1208	0	1	6	6	6	40.3	40.3	40.3	18.027	0	13.677	111180000	13	6	6	6	1	2	4	1	5	4	4	2	4	1	5	4	4	2	4	1	5	4	4	154	154	1	21	NaN	NaN	NaN	NaN
Q7V1B5	Urease subunit beta	Central Metabolism	0.0156596	0.0292645	21.9141	23.3976	-1.48349	0.349802	4	4	4	15.5	15.5	15.5	33.494	0	22.942	56020000	15	4	4	4	1	3	4	0	4	4	4	3	4	0	4	4	4	3	4	0	4	4	4	297	297	1	20	NaN	NaN	NaN	NaN
Q7V1B6	Urease subunit alpha	Central Metabolism	0.0268167	0.0473341	25.8461	26.5324	-0.686207	0.290844	2	2	2	20	20	20	11.173	0	4.7643	21192000	5	2	2	2	1	1	2	1	0	1	1	1	2	1	0	1	1	1	2	1	0	1	1	100	100	1	6	NaN	NaN	NaN	NaN
Q7V1B7	Possible Vng0271c	Other	0.0983537	0.0275617	27.1348	24.8921	2.24276	0.278281	2	2	2	23.6	23.6	23.6	11.678	0	11.676	66279000	10	2	2	2	1	2	2	1	2	2	2	2	2	1	2	2	2	2	2	1	2	2	2	106	106	1	11	NaN	NaN	NaN	NaN
Q7V1B8	Glycoside hydrolase family 13	Central Metabolism	0.00112182	0.00196184	21.386	21.9421	-0.55612	0.274695	25	25	25	53.4	53.4	53.4	61.652	0	269.25	5134500000	203	25	25	25	1	20	23	19	25	25	25	20	23	19	25	25	25	20	23	19	25	25	25	569	569	1	238	NaN	NaN	NaN	NaN
Q7V1B9	Uncharacterized protein	Uncharacterized	0.0538929	0.0647282	25.608	25.8766	-0.268617	0.770472	25	25	25	64.5	64.5	64.5	46.017	0	228.61	2707700000	131	25	25	25	1	23	16	23	6	15	20	23	16	23	6	15	20	23	16	23	6	15	20	408	408	1	156	NaN	NaN	NaN	NaN
Q7V1C0	Uncharacterized protein	Uncharacterized	0.0053763	0.00376646	22.6518	22.0237	0.628114	0.464463	4	4	4	8.5	8.5	8.5	67.39	0	18.365	26672000	10	4	4	4	1	1	1	0	3	2	4	1	1	0	3	2	4	1	1	0	3	2	4	585	585	1	12	NaN	NaN	NaN	NaN
Q7V1C4	Peptide methionine sulfoxide reductase MsrA	Oxidative Stress	0.00368333	0.00449601	21.5817	21.83	-0.24828	0.820883	7	7	7	29.6	29.6	29.6	29.956	0	39.691	565100000	40	7	7	7	1	7	7	4	6	6	7	7	7	4	6	6	7	7	7	4	6	6	7	267	267	1	46	NaN	NaN	NaN	NaN
Q7V1C7	Carbamoyl-phosphate synthase small chain	Central Metabolism	0.00397854	0.00864726	22.0331	23.4678	-1.43471	0.31086	4	4	4	13.2	13.2	13.2	37.098	0	8.2815	54116000	13	4	4	4	1	4	2	3	2	2	2	4	2	3	2	2	2	4	2	3	2	2	2	318	318	1	15	NaN	NaN	NaN	NaN
Q7V1C9	Uncharacterized protein	Uncharacterized	0.027935	0.0195308	23.1507	22.3988	0.751865	0.31054	2	2	2	9.1	9.1	9.1	28.158	0	5.673	46014000	7	2	2	2	1	2	1	1	2	2	2	2	1	1	2	2	2	2	1	1	2	2	2	242	242	1	13	NaN	NaN	NaN	NaN
Q7V1D0	Glutamyl-tRNA(Gln) amidotransferase subunit A	Basic Cellular Processes	0.00966935	0.0175947	23.1278	24.8677	-1.73993	0.448094	6	6	6	18.2	18.2	18.2	42.041	0	11.929	113630000	17	6	6	6	1	1	5	0	5	5	4	1	5	0	5	5	4	1	5	0	5	5	4	380	380	1	23	NaN	NaN	NaN	NaN
Q7V1D3	Holliday junction ATP-dependent DNA helicase RuvA	Basic Cellular Processes	0.17671	0.137941	27.3027	26.6906	0.612099	0.2856	2	2	2	27.5	27.5	27.5	9.3328	0	8.0027	76710000	13	2	2	2	1	2	2	2	2	2	2	2	2	2	2	2	2	2	2	2	2	2	2	80	80	1	19	NaN	NaN	NaN	NaN
Q7V1D4	Possible cAMP phosphodiesterases class-II	Central Metabolism	0.0697075	0.048151	25.03	24.3005	0.729521	0.331612	26	26	26	58.7	58.7	58.7	52.186	0	125.79	1320300000	151	26	26	26	1	24	23	2	26	24	24	24	23	2	26	24	24	24	23	2	26	24	24	484	484	1	174	NaN	NaN	NaN	NaN
Q7V1D6	DNA primase	Basic Cellular Processes	0.00118091	0.00147009	21.2256	21.3775	0	1	2	2	2	7.3	7.3	7.3	25.362	0.0013532	3.3668	3200000000	44	2	2	2	1	2	2	2	2	2	2	2	2	2	2	2	2	2	2	2	2	2	2	219	219	1	60	NaN	NaN	NaN	NaN
Q7V1D9	Ribosomal RNA large subunit methyltransferase H	Basic Cellular Processes	0.00530338	0.00348838	21.552	20.6377	0	1	4	4	4	62.2	62.2	62.2	12.713	0	21.348	292290000	23	4	4	4	1	4	4	3	4	4	4	4	4	3	4	4	4	4	4	3	4	4	4	119	119	1	29	NaN	NaN	NaN	NaN
Q7V1E2	4-diphosphocytidyl-2-C-methyl-D-erythritol kinase	Central Metabolism	0.00435403	0.00631387	21.8236	22.743	-0.919432	0.527909	3	3	3	7.4	7.4	7.4	78.551	0.0013928	3.8392	40308000	3	3	3	3	1	3	1	1	0	1	1	3	1	1	0	1	1	3	1	1	0	1	1	678	678	1	7	NaN	NaN	NaN	NaN
Q7V1E4	Pyruvate dehydrogenase E1 beta subunit	Central Metabolism	0.0199572	0.0263932	24.6839	24.852	-0.168109	0.70695	1	1	1	6.6	6.6	6.6	15.68	0.005277	2.8446	6003600	3	1	1	1	1	1	0	0	0	1	1	1	0	0	0	1	1	1	0	0	0	1	1	137	137	1	4	NaN	NaN	NaN	NaN
Q7V1E8	Uncharacterized protein	Uncharacterized	0.00736945	0.0128898	22.8791	23.9239	-1.04476	0.423184	6	6	6	22.4	22.4	22.4	35.141	0	17.988	84809000	21	6	6	6	1	5	5	0	6	6	4	5	5	0	6	6	4	5	5	0	6	6	4	312	312	1	29	NaN	NaN	NaN	NaN
Q7V1F2	SAM (And some other nucleotide) binding motif:Generic methyl-transferase	Other	0.00257084	0.00268574	21.6401	21.637	0	1	6	6	6	17.1	17.1	17.1	36.022	0	24.484	540040000	38	6	6	6	1	5	5	6	5	6	5	5	5	6	5	6	5	5	5	6	5	6	5	327	327	1	41	NaN	NaN	NaN	NaN
Q7V1F3	Glutamine synthetase	Inorganic Nutrient Processing	0.331434	0.297112	29.3206	28.9108	0.409793	0.336438	14	14	14	42.6	42.6	42.6	40.475	0	45.767	435640000	56	14	14	14	1	7	12	1	11	13	9	7	12	1	11	13	9	7	12	1	11	13	9	350	350	1	72	NaN	NaN	NaN	NaN
Q7V1F4	Serine:pyruvate/alanine:glyoxylate aminotransferase	Central Metabolism	0.0026975	0.00177127	21.7038	21.1977	0	1	2	2	2	4.6	4.6	4.6	41.019	0.0013477	3.3183	11266000	1	2	2	2	1	0	1	0	2	1	1	0	1	0	2	1	1	0	1	0	2	1	1	351	351	1	5	NaN	NaN	NaN	NaN
Q7V1F6	Pyridoxal-dependent decarboxylase family protein	Central Metabolism	0.0187734	0.0112511	25.1149	24.1245	0.990477	0.261086	29	29	29	77.8	77.8	77.8	52.877	0	323.31	19679000000	365	29	29	29	1	27	28	25	28	29	28	27	28	25	28	29	28	27	28	25	28	29	28	473	473	1	375	NaN	NaN	NaN	NaN
Q7V1G1	Pyruvate kinase	Central Metabolism	0.0192092	0.0275549	24.9234	25.75	-0.826532	0.58307	2	2	2	6.9	6.9	6.9	44.114	0	6.3335	65840000	6	2	2	2	1	1	1	1	1	1	2	1	1	1	1	1	2	1	1	1	1	1	2	394	394	1	7	NaN	NaN	NaN	NaN
Q7V1G2	Uncharacterized protein	Uncharacterized	0.061064	0.0442987	24.7401	24.0007	0.739339	0.327229	14	14	14	44.8	44.8	44.8	50.924	0	97.114	631840000	64	14	14	14	1	10	10	10	7	9	9	10	10	10	7	9	9	10	10	10	7	9	9	460	460	1	74	NaN	NaN	NaN	NaN
Q7V1G4	Segregation and condensation protein B	Basic Cellular Processes	0.00374524	0.00444712	21.2332	21.1853	0	1	30	30	30	57.7	57.7	57.7	64.876	0	297.78	2739500000	152	30	30	30	1	25	24	7	24	27	29	25	24	7	24	27	29	25	24	7	24	27	29	596	596	1	188	NaN	NaN	NaN	NaN
Q7V1G5	L-threonine dehydratase	Central Metabolism	0.0136816	0.0246073	24.3606	25.4399	-1.07938	0.394166	6	6	6	46.8	46.8	46.8	12.282	0	31.111	260620000	26	6	6	6	1	4	4	5	3	4	6	4	4	5	3	4	6	4	4	5	3	4	6	109	109	1	32	NaN	NaN	NaN	NaN
Q7V1G6	1-deoxy-D-xylulose-5-phosphate synthase	Central Metabolism	0.00163048	0.000896271	22.0018	20.8532	1.14859	0.253117	1	1	1	9.4	9.4	9.4	18.334	0	9.7821	4931400	1	1	1	1	1	1	0	0	0	0	0	1	0	0	0	0	0	1	0	0	0	0	0	160	160	1	1	NaN	NaN	NaN	NaN
Q7V1H0	50S ribosomal protein L28	Basic Cellular Processes	0.0313656	0.029051	23.3067	22.9626	0.344103	0.464307	29	29	29	54.2	54.2	54.2	57.714	0	129.89	1473600000	127	29	29	29	1	19	25	7	27	26	26	19	25	7	27	26	26	19	25	7	27	26	26	513	513	1	159	NaN	NaN	NaN	NaN
Q7V1H1	Heat shock protein HtpG	Basic Cellular Processes	0.020717	0.0257926	25.4972	25.7983	-0.301084	0.734301	5	5	5	13.5	13.5	13.5	68.935	0	11.259	15483000	7	5	5	5	1	4	0	0	1	0	3	4	0	0	1	0	3	4	0	0	1	0	3	637	637	1	8	NaN	NaN	NaN	NaN
Q7V1H2	Inositol-1-monophosphatase	Central Metabolism	0.0356446	0.0243159	25.3256	24.5468	0.778834	0.275023	6	6	6	37.2	37.2	37.2	8.8874	0	41.544	156930000	25	6	6	6	1	6	6	6	5	6	6	6	6	6	5	6	6	6	6	6	5	6	6	78	78	1	39	NaN	NaN	NaN	NaN
Q7V1H7	Peptidyl-prolyl cis-trans isomerase	Central Metabolism	0.191804	0.0978063	26.7539	25.4699	1.28405	0.292536	32	32	32	56.3	56.3	56.3	72.551	0	207.9	2189200000	180	32	32	32	1	29	25	20	27	29	28	29	25	20	27	29	28	29	25	20	27	29	28	634	634	1	231	NaN	NaN	NaN	NaN
Q7V1H8	Riboflavin biosynthesis protein RibBA	Central Metabolism	0.00680433	0.00401585	23.3742	22.9383	0.435892	0.782698	11	11	11	39.7	39.7	39.7	31.267	0	92.239	635540000	60	11	11	11	1	11	10	10	10	10	11	11	10	10	10	10	11	11	10	10	10	10	11	282	282	1	79	NaN	NaN	NaN	NaN
Q7V1H9	N-acetyl-gamma-glutamyl-phosphate reductase	Central Metabolism	0.0106886	0.0152115	23.8538	24.1995	-0.34565	0.293584	9	9	9	89	89	89	15.395	0	57.837	2021500000	92	9	9	9	1	9	9	9	8	9	9	9	9	9	8	9	9	9	9	9	8	9	9	145	145	1	102	NaN	NaN	NaN	NaN
Q7V1I0	Phosphoribosylglycinamide formyltransferase	Central Metabolism	0.0205187	0.0359117	24.0467	24.7463	-0.699601	0.250462	18	18	18	31	31	31	64.655	0	93.373	525720000	49	18	18	18	1	18	10	6	7	13	12	18	10	6	7	13	12	18	10	6	7	13	12	577	577	1	84	NaN	NaN	NaN	NaN
Q7V1I1	Glucose-6-phosphate isomerase	Central Metabolism	0.0332766	0.061299	25.5507	26.7928	-1.24206	0.373272	8	8	8	25.6	25.6	25.6	38.781	0	22.91	306710000	26	8	8	8	1	8	8	3	7	8	7	8	8	3	7	8	7	8	8	3	7	8	7	351	351	1	44	NaN	NaN	NaN	NaN
Q7V1I2	Leucine--tRNA ligase	Basic Cellular Processes	0.00450026	0.00484796	23.1156	23.628	-0.512366	0.826973	8	8	8	42.7	42.7	42.7	24.445	0	52.328	511510000	32	8	8	8	1	6	8	2	8	8	8	6	8	2	8	8	8	6	8	2	8	8	8	218	218	1	46	NaN	NaN	NaN	NaN
Q7V1I3	Diaminopimelate epimerase	Central Metabolism	0.014256	0.0186029	23.9143	24.1411	-0.226828	0.752397	39	39	39	62.5	62.5	62.5	59.306	0	323.31	5992000000	221	39	39	39	1	26	31	16	36	35	37	26	31	16	36	35	37	26	31	16	36	35	37	526	526	1	260	NaN	NaN	NaN	NaN
Q7V1I4	Possible cysteine desulfurase (Class-V aminotransferase family)	Central Metabolism	0.00299583	0.00314164	21.9642	22.0569	-0.0927626	0.927828	26	26	26	36.7	36.7	36.7	99.146	0	142.02	764540000	81	26	26	26	1	21	19	5	10	24	23	21	19	5	10	24	23	21	19	5	10	24	23	858	858	1	124	NaN	NaN	NaN	NaN
Q7V1I5	Uncharacterized protein	Uncharacterized	0.00356218	0.00364299	21.398	21.2694	0	1	12	12	12	46.2	46.2	46.2	31.975	0	50.993	556600000	56	12	12	12	1	8	7	3	6	11	11	8	7	3	6	11	11	8	7	3	6	11	11	286	286	1	58	NaN	NaN	NaN	NaN
Q7V1I7	Phosphopantetheine adenylyltransferase	Central Metabolism	0.0274125	0.0589085	23.5272	24.9907	-1.46346	0.372088	6	6	6	21.8	21.8	21.8	43.938	0	18.772	48073000	14	6	6	6	1	0	5	0	2	3	5	0	5	0	2	3	5	0	5	0	2	3	5	390	390	1	15	NaN	NaN	NaN	NaN
Q7V1I8	Uncharacterized protein	Uncharacterized	0.185916	0.346125	26.8363	27.5855	-0.749274	0.319484	3	3	3	17.2	17.2	17.2	25.374	0.0014025	4.0032	14900000	3	3	3	3	1	3	0	1	0	1	1	3	0	1	0	1	1	3	0	1	0	1	1	215	215	1	6	NaN	NaN	NaN	NaN
Q7V1J1	Uncharacterized protein	Uncharacterized	0.00232967	0.00299787	21.0091	20.9823	0	1	6	6	6	52.8	52.8	52.8	17.896	0	36.561	455780000	30	6	6	6	1	6	5	0	5	6	5	6	5	0	5	6	5	6	5	0	5	6	5	159	159	1	41	NaN	NaN	NaN	NaN
Q7V1J3	Putative methionine synthase	Central Metabolism	0.0013293	0.00153179	21.9521	22.6148	-0.662685	0.708618	6	6	6	27.2	27.2	27.2	17.514	0	30.838	2835900000	41	6	6	6	1	5	5	6	5	5	5	5	5	6	5	5	5	5	5	6	5	5	5	162	162	1	49	NaN	NaN	NaN	NaN
Q7V1J5	Uncharacterized protein	Uncharacterized	0.0736082	0.0470618	25.264	24.3921	0.871951	0.285623	2	2	2	14	14	14	24.235	0	6.368	7728300	3	2	2	2	1	2	1	0	0	1	0	2	1	0	0	1	0	2	1	0	0	1	0	215	215	1	4	NaN	NaN	NaN	NaN
Q7V1J8	Phenylalanine--tRNA ligase beta subunit	Basic Cellular Processes	0.00708075	0.0148346	23.7801	25.3864	-1.6063	0.393687	8	8	8	7.7	7.7	7.7	132.09	0	21.625	146540000	29	8	8	8	1	8	4	1	5	7	7	8	4	1	5	7	7	8	4	1	5	7	7	1186	1186	1	36	NaN	NaN	NaN	NaN
Q7V1J9	Probable ribonuclease II	Basic Cellular Processes	0.00173761	0.00432787	21.0196	22.5376	-1.51806	0.279777	3	3	3	25.4	25.4	25.4	14.913	0	10.045	235520000	13	3	3	3	1	3	2	2	2	2	2	3	2	2	2	2	2	3	2	2	2	2	2	130	130	1	19	NaN	NaN	NaN	NaN
Q7V1K0	Methionine--tRNA ligase	Basic Cellular Processes	0.135408	0.259435	27.8093	28.8313	-1.02206	0.297327	32	32	32	39.2	39.2	39.2	92.757	0	139.37	1512800000	126	32	32	32	1	20	28	5	27	30	30	20	28	5	27	30	30	20	28	5	27	30	30	821	821	1	151	NaN	NaN	NaN	NaN
Q7V1K3	Putative cobinamide kinase	Central Metabolism	0.00253397	0.00410543	20.893	21.1344	0	1	7	7	7	17.3	17.3	17.3	46.16	0	12.59	67862000	15	7	7	7	1	3	4	0	5	4	5	3	4	0	5	4	5	3	4	0	5	4	5	394	394	1	21	NaN	NaN	NaN	NaN
Q7V1K4	Putative tRNA (cytidine(34)-2-O)-methyltransferase	Central Metabolism	0.00671731	0.00398048	22.0882	21.0825	1.00564	0.284764	45	45	45	65.6	65.6	65.6	59.114	0	313.53	21388000000	404	45	45	45	1	38	42	28	43	41	43	38	42	28	43	41	43	38	42	28	43	41	43	511	511	1	415	NaN	NaN	NaN	NaN
Q7V1K9	Thioredoxin peroxidase	Oxidative Stress	0.358897	0.156104	28.0562	26.6909	1.3653	0.275778	1	1	1	8.2	8.2	8.2	20.848	0	4.3024	4103700	2	1	1	1	1	1	1	0	0	1	0	1	1	0	0	1	0	1	1	0	0	1	0	182	182	1	3	NaN	NaN	NaN	NaN
Q7V1L2	50S ribosomal protein L32	Basic Cellular Processes	0.00792576	0.0130697	20.2375	21.3652	0	1	3	3	3	17.5	17.5	17.5	18.139	0	10.599	34692000	15	3	3	3	1	3	3	3	2	2	2	3	3	3	2	2	2	3	3	3	2	2	2	160	160	1	18	NaN	NaN	NaN	NaN
Q7V1L8	Putative acetazolamide conferring resistance protein Zam	Other	0.000680137	0.000987445	20.8827	21.3217	0	1	18	18	18	83.5	83.5	83.5	21.758	0	195.55	4051200000	142	18	18	18	1	18	16	18	16	18	17	18	16	18	16	18	17	18	16	18	16	18	17	194	194	1	164	NaN	NaN	NaN	NaN
Q7V1M0	Uncharacterized protein	Uncharacterized	0.0468632	0.00626517	24.508	21.9754	2.53261	0.277705	1	1	1	27.6	27.6	27.6	6.4103	0.0076433	2.3797	64760000	3	1	1	1	1	1	1	1	1	1	1	1	1	1	1	1	1	1	1	1	1	1	1	58	58	1	6	NaN	NaN	NaN	NaN
Q7V1M2	Putative modulator of DNA gyrase TldD	Basic Cellular Processes	0.00517192	0.00610312	23.1725	23.2917	-0.119201	0.848816	3	3	3	3.7	3.7	3.7	86.16	0	6.9577	9227100	4	3	3	3	1	3	0	1	0	1	1	3	0	1	0	1	1	3	0	1	0	1	1	739	739	1	6	NaN	NaN	NaN	NaN
Q7V1M3	Possible modulator of DNA gyrase	Basic Cellular Processes	0.00638354	0.0115257	22.5018	24.1337	-1.63187	0.445747	10	10	10	49.2	49.2	49.2	20.906	0	23.601	207510000	20	10	10	10	1	9	3	4	3	3	4	9	3	4	3	3	4	9	3	4	3	3	4	183	183	1	27	NaN	NaN	NaN	NaN
Q7V1M5	Transcription-repair-coupling factor	Basic Cellular Processes	0.000971588	0.00205065	21.8431	23.0465	-1.20341	0.272939	12	12	12	35	35	35	51.976	0	62.043	344230000	42	12	12	12	1	10	12	6	9	11	12	10	12	6	9	11	12	10	12	6	9	11	12	474	474	1	64	NaN	NaN	NaN	NaN
Q7V1N1	4-hydroxy-tetrahydrodipicolinate reductase	Central Metabolism	0.0861973	0.100576	26.6299	26.6061	0.0237675	0.887084	15	15	15	50.4	50.4	50.4	49.756	0	56.767	673370000	60	15	15	15	1	10	13	1	12	13	13	10	13	1	12	13	13	10	13	1	12	13	13	450	450	1	75	NaN	NaN	NaN	NaN
Q7V1N3	Dihydropteroate synthase	Central Metabolism	0.00193162	0.00206289	21.0221	20.9847	0	1	7	7	7	9.3	9.3	9.3	134.98	0	26.694	91211000	17	7	7	7	1	1	4	2	3	6	7	1	4	2	3	6	7	1	4	2	3	6	7	1171	1171	1	25	NaN	NaN	NaN	NaN
Q7V1N4	Triosephosphate isomerase	Central Metabolism	0.125441	0.166089	26.926	27.0921	-0.166129	0.655791	29	29	29	86.2	86.2	86.2	30.639	0	323.31	4571900000	218	29	29	29	1	20	23	19	26	24	28	20	23	19	26	24	28	20	23	19	26	24	28	282	282	1	233	NaN	NaN	NaN	NaN
Q7V1N8	Carbamoyl-phosphate synthase large chain	Central Metabolism	0.00952335	0.0169246	25.2001	25.9916	-0.791541	0.281156	1	1	1	4.3	4.3	4.3	31.585	0.0013755	3.6304	6544100	3	1	1	1	1	1	1	0	0	1	1	1	1	0	0	1	1	1	1	0	0	1	1	280	280	1	5	NaN	NaN	NaN	NaN
Q7V1Q2	Ferritin	Inorganic Nutrient Processing	0.64091	0.280466	28.8252	27.4481	1.37705	0.269966	18	18	18	56.4	56.4	56.4	26.828	0	167.52	2687800000	127	18	18	18	1	14	16	14	16	16	17	14	16	14	16	16	17	14	16	14	16	16	17	241	241	1	137	NaN	NaN	NaN	NaN
Q7V1Q3	ABC transporter, ATP binding component, possibly iron transporter	Membrane Transport	0.0252018	0.0274292	25.1573	25.05	0.107391	0.682508	22	22	21	25.7	25.7	24.9	121.48	0	111.01	1118400000	88	22	22	21	1	11	15	2	20	20	18	11	15	2	20	20	18	11	15	2	20	20	18	1099	1099	1	135	NaN	NaN	NaN	NaN
Q7V1Q7	Uncharacterized protein	Uncharacterized	0.00314744	0.00332058	20.9758	21.187	0	1	12	12	12	58.7	58.7	58.7	21.064	0	124.68	9851000000	162	12	12	12	1	12	12	12	12	12	12	12	12	12	12	12	12	12	12	12	12	12	12	184	184	1	169	NaN	NaN	NaN	NaN
Q7V1Q9	Possible mRNA binding protein	Basic Cellular Processes	0.0225445	0.0491347	23.6511	25.6898	-2.03872	0.407967	5	5	5	13.6	13.6	13.6	39.722	0	6.0318	248910000	11	5	5	5	1	4	3	2	3	5	3	4	3	2	3	5	3	4	3	2	3	5	3	352	352	1	20	NaN	NaN	NaN	NaN
Q7V1R5	Uncharacterized protein	Uncharacterized	0.167954	0.0877094	26.9177	25.7402	1.17754	0.392	1	1	1	3.9	3.9	3.9	22.756	0.0064851	2.6984	5489600	2	1	1	1	1	1	0	1	0	0	0	1	0	1	0	0	0	1	0	1	0	0	0	203	203	1	2	NaN	NaN	NaN	NaN
Q7V1R7	Glutamate 5-kinase	Central Metabolism	0.00125614	0.00242865	20.8658	21.4154	0	1	20	20	20	72.9	72.9	72.9	35.443	0	151.96	1357400000	98	20	20	20	1	14	19	2	18	18	18	14	19	2	18	18	18	14	19	2	18	18	18	306	306	1	118	NaN	NaN	NaN	NaN
Q7V1R8	UDP-3-O-acylglucosamine N-acyltransferase	Central Metabolism	0.00676763	0.0136562	23.0581	24.0143	-0.95627	0.288375	8	8	8	44.9	44.9	44.9	20.46	0	102.01	2012300000	63	8	8	8	1	8	8	8	8	8	8	8	8	8	8	8	8	8	8	8	8	8	8	178	178	1	71	NaN	NaN	NaN	NaN
Q7V1R9	3-isopropylmalate dehydrogenase	Central Metabolism	0.0432975	0.041835	25.9788	25.6831	0.295704	0.35089	5	5	5	18.6	18.6	18.6	39.474	0	13.146	26986000	9	5	5	5	1	5	1	1	0	2	1	5	1	1	0	2	1	5	1	1	0	2	1	360	360	1	10	NaN	NaN	NaN	NaN
Q7V1S0	Phosphoribulokinase	Other	0.166024	0.291515	27.5375	28.2247	-0.687186	0.250742	6	6	6	14	14	14	37.014	0	17.483	206120000	17	6	6	6	1	3	5	2	3	5	5	3	5	2	3	5	5	3	5	2	3	5	5	344	344	1	26	NaN	NaN	NaN	NaN
Q7V1S3	Putative oxidoreductase	Central Metabolism	0.0105746	0.0138266	23.9181	24.1177	-0.199609	0.469309	16	16	16	47.1	47.1	47.1	39.033	0	157.19	1929200000	102	16	16	16	1	14	13	13	15	15	14	14	13	13	15	15	14	14	13	13	15	15	14	357	357	1	139	NaN	NaN	NaN	NaN
Q7V1S4	Fructose-bisphosphate/sedoheptulose-1,7-bisphosph ate aldolase	Central Metabolism	0.432538	0.46775	28.828	29.111	-0.283009	0.843619	20	20	20	52.5	52.5	52.5	33.698	0	323.31	10243000000	210	20	20	20	1	16	18	14	18	20	19	16	18	14	18	20	19	16	18	14	18	20	19	299	299	1	229	NaN	NaN	NaN	NaN
Q7V1S5	Phosphoribosylformylglycinamidine synthase subunit PurQ	Central Metabolism	0.0194495	0.042803	23.3125	25.022	-1.70954	0.326516	12	12	12	35.4	35.4	35.4	41.297	0	41.605	459830000	47	12	12	12	1	9	12	2	12	12	12	9	12	2	12	12	12	9	12	2	12	12	12	367	367	1	64	NaN	NaN	NaN	NaN
Q7V1S6	Phosphoribosylformylglycinamidine synthase subunit PurS	Central Metabolism	0.0782001	0.0876555	24.724	24.6275	0.0965201	0.746872	24	24	24	69.2	69.2	69.2	39	0	263.51	22526000000	233	24	24	24	1	24	24	15	23	24	24	24	24	15	23	24	24	24	24	15	23	24	24	357	357	1	228	NaN	NaN	NaN	NaN
Q7V1S7	Putative cobalamin synthesis protein	Central Metabolism	0.00557907	0.00411615	22.2037	21.6592	0.544542	0.829007	5	5	5	33.9	33.9	33.9	24.127	0	32.498	327340000	25	5	5	5	1	2	4	1	5	5	4	2	4	1	5	5	4	2	4	1	5	5	4	221	221	1	27	NaN	NaN	NaN	NaN
Q7V1S9	Putative uracil phosphoribosyltransferase	Central Metabolism	0.0338037	0.0455004	24.7528	24.9825	-0.229686	0.51249	4	4	4	59	59	59	9.3688	0	19.896	415860000	26	4	4	4	1	4	4	2	4	4	4	4	4	2	4	4	4	4	4	2	4	4	4	83	83	1	33	NaN	NaN	NaN	NaN
Q7V1T1	Dihydroxy-acid dehydratase	Central Metabolism	0.0103276	0.00939667	24.5525	24.1752	0.377305	0.404192	5	5	5	17.4	17.4	17.4	39.889	0	9.2048	70392000	10	5	5	5	1	4	2	0	1	3	2	4	2	0	1	3	2	4	2	0	1	3	2	351	351	1	12	NaN	NaN	NaN	NaN
Q7V1T4	Putative 6-phosphogluconolactonase (DevB, Pgl)	Central Metabolism	0.0453849	0.0860801	25.4216	26.1809	-0.759323	1	10	10	10	60	60	60	23.181	0	51.359	566880000	54	10	10	10	1	8	7	6	9	9	9	8	7	6	9	9	9	8	7	6	9	9	9	205	205	1	71	NaN	NaN	NaN	NaN
Q7V1T5	6-phosphogluconate dehydrogenase, decarboxylating	Central Metabolism	0.116034	0.287033	27.1385	28.8605	-1.72201	0.280396	18	18	18	32.9	32.9	32.9	59.46	0	45.49	541600000	59	18	18	18	1	13	14	12	15	18	13	13	14	12	15	18	13	13	14	12	15	18	13	559	559	1	99	NaN	NaN	NaN	NaN
Q7V1T6	ADP-glucose pyrophosphorylase	Central Metabolism	0.0970068	0.145464	27.3141	27.7512	-0.437099	0.306771	12	12	12	51.4	51.4	51.4	27.643	0	68.341	1482800000	60	12	12	12	1	9	10	6	11	10	11	9	10	6	11	10	11	9	10	6	11	10	11	245	245	1	88	NaN	NaN	NaN	NaN
Q7V1T7	Glutamyl-tRNA reductase	Photosynthesis	0.00795088	0.0113143	23.6705	24.0489	-0.378414	0.478973	29	29	29	62.5	62.5	62.5	51.709	0	262.59	16548000000	331	29	29	29	1	22	29	18	29	28	28	22	29	18	29	28	28	22	29	18	29	28	28	472	472	1	362	NaN	NaN	NaN	NaN
Q7V1T8	D-fructose 1,6-bisphosphatase class 2/sedoheptulose 1,7-bisphosphatase	Central Metabolism	0.206606	0.47274	27.6056	29.0742	-1.46855	0.283646	40	40	40	78.4	78.4	78.4	48.073	0	323.31	12528000000	367	40	40	40	1	35	36	29	38	37	37	35	36	29	38	37	37	35	36	29	38	37	37	431	431	1	387	NaN	NaN	NaN	NaN
Q7V1T9	Ribulose-phosphate 3-epimerase	Carbon Fixation	0.204533	0.232092	27.709	27.6462	0.0627956	0.865195	14	14	14	37.6	37.6	37.6	48.288	0	89.511	484350000	51	14	14	14	1	9	11	2	13	13	14	9	11	2	13	13	14	9	11	2	13	13	14	433	433	1	73	NaN	NaN	NaN	NaN
Q7V1U3	Tyrosine binding protein	Central Metabolism	0.0162186	0.00744299	24.7762	23.7402	1.03599	0.47464	17	17	17	62.8	62.8	62.8	35.15	0	238.28	13390000000	250	17	17	17	1	14	15	9	17	17	16	14	15	9	17	17	16	14	15	9	17	17	16	333	333	1	241	NaN	NaN	NaN	NaN
Q7V1U6	Glycine--tRNA ligase beta subunit	Basic Cellular Processes	0.00576903	0.00870286	23.1465	24.3724	-1.22593	0.529006	11	11	11	61	61	61	27.324	0	98.741	4630400000	116	11	11	11	1	9	9	9	10	11	11	9	9	9	10	11	11	9	9	9	10	11	11	251	251	1	115	NaN	NaN	NaN	NaN
Q7V1U7	Ferredoxin-sulfite reductase	Photosynthesis	0.010165	0.0173643	24.3522	25.1402	-0.788024	0.350308	12	12	12	28.3	28.3	28.3	66.792	0	84.543	537170000	42	12	12	12	1	11	8	6	4	7	7	11	8	6	4	7	7	11	8	6	4	7	7	600	600	1	65	NaN	NaN	NaN	NaN
Q7V1V0	30S ribosomal protein S2	Basic Cellular Processes	0.0568114	0.0693134	25.7146	25.7821	-0.0674928	0.864212	30	30	30	33.8	33.8	33.8	82.783	0	103.84	990360000	94	30	30	30	1	23	23	4	25	30	26	23	23	4	25	30	26	23	23	4	25	30	26	720	720	1	135	NaN	NaN	NaN	NaN
Q7V1W0	ATP-dependent Clp protease proteolytic subunit 1	Basic Cellular Processes	0.063995	0.0961389	25.4049	26.0131	-0.608188	0.458876	24	24	24	38.4	38.4	38.4	67.886	0	124.03	1365400000	115	24	24	24	1	17	23	8	19	23	23	17	23	8	19	23	23	17	23	8	19	23	23	596	596	1	134	NaN	NaN	NaN	NaN
Q7V1W1	Protein Thf1	Other	0.0184312	0.0251596	23.9229	24.1143	-0.191439	0.45943	8	8	8	30.8	30.8	30.8	26.379	0	32.602	574000000	41	8	8	8	1	8	8	4	8	8	8	8	8	4	8	8	8	8	8	4	8	8	8	234	234	1	60	NaN	NaN	NaN	NaN
Q7V1W4	Conserved hypothetical	Uncharacterized	0.0571432	0.0524175	24.3582	24.0007	0.357461	0.466785	8	8	8	38.8	38.8	38.8	21.873	0	87.586	1668700000	65	8	8	8	1	8	7	7	8	8	8	8	7	7	8	8	8	8	7	7	8	8	8	196	196	1	74	NaN	NaN	NaN	NaN
Q7V1W7	Uncharacterized protein	Uncharacterized	0.00140389	0.00155987	21.1362	21.1535	0	1	12	12	12	48	48	48	23.535	0	38.096	506760000	56	12	12	12	1	9	10	8	10	9	10	9	10	8	10	9	10	9	10	8	10	9	10	202	202	1	71	NaN	NaN	NaN	NaN
Q7V1X7	Uncharacterized protein	Uncharacterized	0.306058	0.331769	26.9592	26.8345	0.124637	0.820906	5	5	5	41.6	41.6	41.6	10.67	0	27.915	258440000	21	5	5	5	1	4	4	5	5	5	5	4	4	5	5	5	5	4	4	5	5	5	5	89	89	1	37	NaN	NaN	NaN	NaN
Q7V1Y2	Glyceraldehyde-3-phosphate dehydrogenase	Central Metabolism	0.0217786	0.0520879	24.0547	25.9278	-1.87306	0.322596	4	4	4	10	10	10	51.083	0	7.9965	33648000	4	4	4	4	1	3	2	1	0	1	1	3	2	1	0	1	1	3	2	1	0	1	1	438	438	1	9	NaN	NaN	NaN	NaN
Q7V1Y5	Phosphate-binding protein	Membrane Transport	10.7694	7.85444	33.7884	33.083	0.705448	0.280597	7	7	7	77.2	77.2	77.2	11.34	0	120.99	2564200000	74	7	7	7	1	6	6	6	7	7	7	6	6	6	7	7	7	6	6	6	7	7	7	101	101	1	75	NaN	NaN	NaN	NaN
Q7V1Y7	Putative secreted protein	Other	0.0570997	0.0374509	27.4482	26.6135	0.834746	0.269897	21	21	21	82.6	82.6	82.6	37.941	0	203.38	2434100000	129	21	21	21	1	11	20	6	19	20	19	11	20	6	19	20	19	11	20	6	19	20	19	340	340	1	139	NaN	NaN	NaN	NaN
Q7V1Y9	Two-component response regulator, phosphate	Inorganic Nutrient Processing	0.0034833	0.00416941	21.217	21.6538	0	1	38	38	38	86.7	86.7	86.7	33.886	0	323.31	389610000000	1264	38	38	38	1	33	31	36	35	36	35	33	31	36	35	36	35	33	31	36	35	36	35	323	323	1	1006	NaN	NaN	NaN	NaN
Q7V1Z0	Putative potassium channel, VIC family	Membrane Transport	0.00199956	0.002482	21.1678	21.5253	0	1	40	40	40	51.2	51.2	51.2	82.608	0	323.31	6759900000	273	40	40	40	1	37	39	38	37	39	37	37	39	38	37	39	37	37	39	38	37	39	37	760	760	1	337	NaN	NaN	NaN	NaN
Q7V1Z9	Glutamine amidotransferase class-I	Central Metabolism	0.00347921	0.00476522	21.5531	21.9683	-0.415213	0.571984	4	4	4	19	19	19	27.788	0	10.757	17462000	4	4	4	4	1	4	1	1	0	1	1	4	1	1	0	1	1	4	1	1	0	1	1	242	242	1	8	NaN	NaN	NaN	NaN
Q7V200	Short-chain dehydrogenase/reductase (SDR) superfamily	Central Metabolism	0.00990866	0.01978	22.3918	23.9098	-1.51808	0.407767	1	1	1	2.8	2.8	2.8	39.024	0	9.3934	36320000	3	1	1	1	1	1	1	1	1	1	1	1	1	1	1	1	1	1	1	1	1	1	1	351	351	1	6	NaN	NaN	NaN	NaN
Q7V208	N5-carboxyaminoimidazole ribonucleotide synthase	Central Metabolism	0.0208669	0.0357776	24.7764	25.6062	-0.829816	0.335863	3	3	3	13.2	13.2	13.2	27.759	0	10.01	28846000	11	3	3	3	1	0	2	0	3	2	3	0	2	0	3	2	3	0	2	0	3	2	3	242	242	1	11	NaN	NaN	NaN	NaN
Q7V209	3-dehydroquinate synthase	Central Metabolism	0.0174084	0.0272173	24.0019	25.0808	-1.07891	0.47518	8	8	8	43	43	43	24.394	0	89.187	415400000	48	8	8	8	1	6	8	1	8	7	8	6	8	1	8	7	8	6	8	1	8	7	8	221	221	1	56	NaN	NaN	NaN	NaN
Q7V210	Uncharacterized protein	Uncharacterized	0.00199172	0.00247736	21.4192	21.7104	0	1	19	19	19	41.4	41.4	41.4	45.293	0	84.127	1545700000	82	19	19	19	1	14	18	7	17	17	16	14	18	7	17	17	16	14	18	7	17	17	16	396	396	1	111	NaN	NaN	NaN	NaN
Q7V212	Putative transcripton factor	Basic Cellular Processes	0.00312738	0.00150836	21.6042	20.5704	0	1	21	21	21	52.1	52.1	52.1	40.622	0	96.855	1091400000	90	21	21	21	1	19	19	4	20	21	20	19	19	4	20	21	20	19	19	4	20	21	20	363	363	1	112	NaN	NaN	NaN	NaN
Q7V213	Quinolinate synthase A	Central Metabolism	0.00302087	0.00287233	21.7377	21.5629	0	1	3	3	3	10.9	10.9	10.9	45.076	0	5.5419	41849000	3	3	3	3	1	3	1	1	1	1	1	3	1	1	1	1	1	3	1	1	1	1	1	396	396	1	8	NaN	NaN	NaN	NaN
Q7V214	Carboxyl-terminal processing protease	Central Metabolism	0.0160331	0.00754658	24.7412	23.4718	1.26941	0.274	2	2	2	9	9	9	32.528	0.0064516	2.6675	27388000	1	2	2	2	1	1	2	0	1	1	1	1	2	0	1	1	1	1	2	0	1	1	1	289	289	1	6	NaN	NaN	NaN	NaN
Q7V215	4-hydroxy-3-methylbut-2-en-1-yl diphosphate synthase (ferredoxin)	Central Metabolism	0.00415612	0.0050353	22.598	22.8071	-0.20911	0.727433	4	4	4	22	22	22	34.16	0	11.668	39725000	7	4	4	4	1	0	2	0	2	1	3	0	2	0	2	1	3	0	2	0	2	1	3	304	304	1	9	NaN	NaN	NaN	NaN
Q7V217	Aminotransferase	Central Metabolism	0.0720704	0.131588	26.6914	27.4719	-0.780533	0.282254	12	12	12	29.4	29.4	29.4	47.962	0	74.629	351220000	40	12	12	12	1	10	9	9	8	8	7	10	9	9	8	8	7	10	9	9	8	8	7	429	429	1	54	NaN	NaN	NaN	NaN
Q7V218	Putative phosphonate binding protein for ABC transporter	Membrane Transport	0.031708	0.0252607	25.2609	24.7089	0.552016	0.292646	10	10	10	29.9	29.9	29.9	45.022	0	32.067	154300000	29	10	10	10	1	7	7	2	5	9	8	7	7	2	5	9	8	7	7	2	5	9	8	405	405	1	42	NaN	NaN	NaN	NaN
Q7V223	Ribosomal RNA small subunit methyltransferase E	Basic Cellular Processes	0.00841668	0.0155938	22.5481	23.7728	-1.22465	0.413184	34	34	34	77.4	77.4	77.4	43.908	0	323.31	9067300000	242	34	34	34	1	25	34	25	33	33	33	25	34	25	33	33	33	25	34	25	33	33	33	393	393	1	281	NaN	NaN	NaN	NaN
Q7V224	Uncharacterized protein	Uncharacterized	0.00415361	0.0024	21.0872	20.2111	0	1	14	14	14	58.1	58.1	58.1	34.175	0	92.415	652180000	69	14	14	14	1	13	10	13	9	9	11	13	10	13	9	9	11	13	10	13	9	9	11	301	301	1	82	NaN	NaN	NaN	NaN
Q7V226	33 kDa chaperonin	Basic Cellular Processes	0.00227432	0.00217904	21.214	21.1645	0.0495548	0.960868	7	7	7	18.3	18.3	18.3	29.72	0	18.741	175920000	24	7	7	7	1	4	5	1	6	7	7	4	5	1	6	7	7	4	5	1	6	7	7	257	257	1	34	NaN	NaN	NaN	NaN
Q7V228	Peptide chain release factor 3	Basic Cellular Processes	0.00276227	0.00112749	22.3216	20.8299	1.49173	0.325559	2	2	2	15	15	15	17.096	0.0065359	2.7446	2750500	2	2	2	2	1	0	1	1	0	0	1	0	1	1	0	0	1	0	1	1	0	0	1	147	147	1	3	NaN	NaN	NaN	NaN
Q7V229	Uncharacterized protein	Uncharacterized	0.0163051	0.0219801	23.2862	24.1166	-0.830367	0.577014	5	5	5	21.3	21.3	21.3	33.348	0	16.362	15923000	8	5	5	5	1	3	1	4	0	2	1	3	1	4	0	2	1	3	1	4	0	2	1	300	300	1	11	NaN	NaN	NaN	NaN
Q7V230	Ribonucleotide reductase (Class II)	Basic Cellular Processes	0.0102097	0.0107135	24.7781	24.7501	0.0280259	0.987343	6	6	6	15	15	15	61.821	0	20.229	30681000	7	6	6	6	1	5	1	2	1	0	2	5	1	2	1	0	2	5	1	2	1	0	2	545	545	1	12	NaN	NaN	NaN	NaN
Q7V243	FAD linked oxidase, N-terminal	Other	0.00232328	0.00410631	21.8385	22.569	-0.730427	0.283303	6	6	6	37.2	37.2	37.2	26.644	0	13.151	135230000	10	6	6	6	1	5	3	2	3	4	3	5	3	2	3	4	3	5	3	2	3	4	3	231	231	1	20	NaN	NaN	NaN	NaN
Q7V245	Putative homoserine O-succinyltransferase	Central Metabolism	0.0125314	0.0300136	23.3963	24.9286	-1.53237	0.28513	26	26	26	38.2	38.2	38.2	90.661	0	157.99	1438200000	106	26	26	26	1	21	20	9	18	20	25	21	20	9	18	20	25	21	20	9	18	20	25	802	802	1	143	NaN	NaN	NaN	NaN
Q7V246	Uncharacterized protein	Uncharacterized	0.0304098	0.0102153	24.5267	22.8346	1.69208	0.278207	10	10	10	28.5	28.5	28.5	48.631	0	26.521	95262000	23	10	10	10	1	4	7	0	6	7	6	4	7	0	6	7	6	4	7	0	6	7	6	425	425	1	31	NaN	NaN	NaN	NaN
Q7V247	Uncharacterized protein	Uncharacterized	0.00724979	0.00265818	23.3601	22.1719	1.18814	0.411372	16	16	16	52.7	52.7	52.7	34.032	0	60.288	869230000	78	16	16	16	1	9	15	4	15	16	14	9	15	4	15	16	14	9	15	4	15	16	14	296	296	1	101	NaN	NaN	NaN	NaN
Q7V248	Putative glucosylglycerolphosphate phosphatase	Central Metabolism	0.00448123	0.00617793	22.6805	23.0959	-0.415339	0.496069	8	8	8	35.2	35.2	35.2	26.144	0	28.33	275650000	28	8	8	8	1	8	6	7	3	8	6	8	6	7	3	8	6	8	6	7	3	8	6	219	219	1	38	NaN	NaN	NaN	NaN
Q7V251	Isochorismatase hydrolase family	Central Metabolism	0.0519365	0.0564339	25.2853	25.1667	0.118673	0.302149	9	9	9	22.2	22.2	22.2	57.871	0	26.73	126430000	17	9	9	9	1	9	3	4	2	2	4	9	3	4	2	2	4	9	3	4	2	2	4	508	508	1	29	NaN	NaN	NaN	NaN
Q7V255	Short-chain dehydrogenase/reductase (SDR) superfamily	Central Metabolism	0.00696209	0.0115271	22.5489	23.2154	-0.666459	0.329723	8	8	8	25.1	25.1	25.1	45.636	0	29.711	170880000	30	8	8	8	1	7	6	2	7	8	8	7	6	2	7	8	8	7	6	2	7	8	8	403	403	1	39	NaN	NaN	NaN	NaN
Q7V263	Histidine--tRNA ligase	Basic Cellular Processes	0.0118046	0.0122316	23.9342	24.1294	-0.195235	0.882793	9	9	9	48.6	48.6	48.6	21	0	49.971	473170000	50	9	9	9	1	7	8	4	8	8	8	7	8	4	8	8	8	7	8	4	8	8	8	185	185	1	53	NaN	NaN	NaN	NaN
Q7V267	Acetyl-coenzyme A synthetase	Central Metabolism	0.0136349	0.0122572	24.8482	24.7861	0.0621446	0.961902	5	5	5	31.1	31.1	31.1	26.197	0	14.447	135010000	14	5	5	5	1	4	5	1	5	4	4	4	5	1	5	4	4	4	5	1	5	4	4	235	235	1	23	NaN	NaN	NaN	NaN
Q7V268	Polyprenyl synthetase solanesyl diphosphate synthase (Sds)	Central Metabolism	0.00912446	0.0123037	23.2699	23.7693	-0.499345	0.571046	13	13	13	29.4	29.4	29.4	49.169	0	39.963	615590000	50	13	13	13	1	12	11	7	11	13	12	12	11	7	11	13	12	12	11	7	11	13	12	429	429	1	72	NaN	NaN	NaN	NaN
Q7V270	Possible nitrilase	Inorganic Nutrient Processing	0.0342046	0.0665433	24.8009	25.9726	-1.17171	0.323984	32	32	32	50.5	50.5	50.5	74.452	0	208.39	2009500000	141	32	32	32	1	32	25	13	26	29	26	32	25	13	26	29	26	32	25	13	26	29	26	660	660	1	205	NaN	NaN	NaN	NaN
Q7V271	2-phosphosulfolactate phosphatase	Central Metabolism	0.158135	0.249182	26.9572	27.4632	-0.506026	0.317123	9	9	9	35.3	35.3	35.3	35.912	0	38.58	227810000	34	9	9	9	1	7	6	2	7	9	7	7	6	2	7	9	7	7	6	2	7	9	7	323	323	1	41	NaN	NaN	NaN	NaN
Q7V272	3-phosphoshikimate 1-carboxyvinyltransferase	Central Metabolism	0.0171009	0.0329427	24.4454	25.6332	-1.18775	0.346976	13	13	13	58.2	58.2	58.2	30.465	0	112.93	1388300000	76	13	13	13	1	8	13	3	12	13	13	8	13	3	12	13	13	8	13	3	12	13	13	275	275	1	85	NaN	NaN	NaN	NaN
Q7V274	Bifunctional protein GlmU	Other	0.0155279	0.0396325	24.4308	25.9264	-1.49563	0.261374	11	11	11	49.8	49.8	49.8	22.902	0	96.17	2324100000	98	11	11	11	1	8	9	6	10	10	11	8	9	6	10	10	11	8	9	6	10	10	11	207	207	1	108	NaN	NaN	NaN	NaN
Q7V275	Glycogen synthase	Central Metabolism	0.00280288	0.00389935	22.4064	22.6758	-0.269423	0.493763	25	25	25	64.6	64.6	64.6	46.888	0	144.93	2058300000	139	25	25	25	1	19	23	9	21	22	24	19	23	9	21	22	24	19	23	9	21	22	24	438	438	1	173	NaN	NaN	NaN	NaN
Q7V276	1,4-dihydroxy-2-naphthoyl-CoA synthase	Central Metabolism	0.091844	0.0747362	26.7335	26.1938	0.539611	0.260492	27	27	27	61.9	61.9	61.9	49.749	0	208.79	1788100000	134	27	27	27	1	18	21	8	25	26	25	18	21	8	25	26	25	18	21	8	25	26	25	449	449	1	169	NaN	NaN	NaN	NaN
Q7V277	2-succinyl-5-enolpyruvyl-6-hydroxy-3-cyclohexene-1-carboxylate synthase	Central Metabolism	0.00196593	0.00230198	22.1826	22.1706	0.012001	0.98701	11	11	11	25.7	25.7	25.7	54.923	0	31.305	129860000	38	11	11	11	1	8	7	3	7	9	11	8	7	3	7	9	11	8	7	3	7	9	11	483	483	1	47	NaN	NaN	NaN	NaN
Q7V286	Tryptophan--tRNA ligase	Basic Cellular Processes	0.0153644	0.0308212	23.6768	25.1632	-1.48649	0.36956	20	20	20	68.8	68.8	68.8	31.549	0	180.2	2554100000	95	20	20	20	1	17	16	17	16	19	18	17	16	17	16	19	18	17	16	17	16	19	18	285	285	1	137	NaN	NaN	NaN	NaN
Q7V287	Threonine--tRNA ligase	Basic Cellular Processes	0.00839074	0.0182883	23.3451	25.3231	-1.97804	0.371233	12	12	12	20.7	20.7	20.7	66.111	0	21.466	109610000	27	12	12	12	1	6	7	2	3	9	10	6	7	2	3	9	10	6	7	2	3	9	10	588	588	1	37	NaN	NaN	NaN	NaN
Q7V288	Putative glucokinase	Central Metabolism	0.00647963	0.00931061	22.9004	23.4645	-0.564062	0.48445	16	16	16	39.3	39.3	39.3	38.463	0	71.566	1269900000	91	16	16	16	1	13	16	4	15	16	15	13	16	4	15	16	15	13	16	4	15	16	15	338	338	1	112	NaN	NaN	NaN	NaN
Q7V289	Homoserine kinase	Central Metabolism	0.014478	0.023338	23.8895	24.6378	-0.748226	0.443886	35	35	35	50.3	50.3	50.3	74.078	0	182.37	2191400000	167	35	35	35	1	21	33	6	29	33	33	21	33	6	29	33	33	21	33	6	29	33	33	638	638	1	212	NaN	NaN	NaN	NaN
Q7V290	Peptidase family M3	Membrane Transport	0.0199235	0.0390919	25.2121	26.5449	-1.33284	0.333628	4	4	4	13	13	13	38.556	0	16.488	147330000	12	4	4	4	1	2	2	1	3	3	4	2	2	1	3	3	4	2	2	1	3	3	4	345	345	1	20	NaN	NaN	NaN	NaN
Q7V292	7,8-dihydroneopterin aldolase	Central Metabolism	0.122788	0.0795357	25.9051	25.0359	0.869165	0.3255	6	6	6	26	26	26	33.693	0	37.167	322950000	32	6	6	6	1	5	5	2	5	5	6	5	5	2	5	5	6	5	5	2	5	5	6	315	315	1	35	NaN	NaN	NaN	NaN
Q7V293	Gamma-glutamyl phosphate reductase	Central Metabolism	0.0184254	0.0168025	24.8432	24.6557	0.18749	0.827236	46	46	46	66.3	66.3	66.3	80.149	0	323.31	5484000000	256	46	46	46	1	31	44	16	45	45	43	31	44	16	45	45	43	31	44	16	45	45	43	695	695	1	318	NaN	NaN	NaN	NaN
Q7V297	Conserved hypothetical	Uncharacterized	0.00666617	0.0103273	21.1649	21.5677	0	1	3	3	3	20.8	20.8	20.8	14.045	0	9.6977	546170000	18	3	3	3	1	3	3	3	3	3	3	3	3	3	3	3	3	3	3	3	3	3	3	120	120	1	18	NaN	NaN	NaN	NaN
Q7V298	Uncharacterized protein	Uncharacterized	0.0848248	0.0897741	27.5032	27.3352	0.168013	0.484105	19	19	19	49.8	49.8	49.8	48.304	0	188.36	1069500000	92	19	19	19	1	18	10	10	17	16	17	18	10	10	17	16	17	18	10	10	17	16	17	436	436	1	116	NaN	NaN	NaN	NaN
Q7V299	1,4-alpha-glucan branching enzyme GlgB	Central Metabolism	0.00955806	0.0166033	24.8461	25.4143	-0.568181	0.294387	2	2	2	25	25	25	9.6652	0	10.499	11792000	3	2	2	2	1	1	0	2	0	0	0	1	0	2	0	0	0	1	0	2	0	0	0	88	88	1	3	NaN	NaN	NaN	NaN
Q7V2A0	Uroporphyrinogen decarboxylase	Central Metabolism	0.0460057	0.0996582	25.5569	26.8884	-1.33144	0.27488	23	23	23	46.7	46.7	46.7	59.393	0	136.71	4384300000	167	23	23	23	1	19	21	22	22	19	20	19	21	22	22	19	20	19	21	22	22	19	20	525	525	1	207	NaN	NaN	NaN	NaN
Q7V2A4	Uncharacterized protein	Uncharacterized	0.0576237	0.0669066	25.1415	25.1401	0.00133896	0.997697	23	23	23	33.6	33.6	33.6	88.183	0	82.283	1234300000	100	23	23	23	1	18	15	8	15	20	18	18	15	8	15	20	18	18	15	8	15	20	18	754	754	1	126	NaN	NaN	NaN	NaN
Q7V2A5	Putative type II alternative sigma factor, sigma70 family	Basic Cellular Processes	0.00188154	0.00207295	20.8684	21.1176	0	1	29	29	29	56.1	56.1	56.1	38.974	0	195.22	5764100000	188	29	29	29	1	20	27	12	26	27	29	20	27	12	26	27	29	20	27	12	26	27	29	346	346	1	212	NaN	NaN	NaN	NaN
Q7V2A8	Uncharacterized protein	Uncharacterized	0.100262	0.107151	25.1504	25.0515	0.0989126	0.827768	8	8	8	57.8	57.8	57.8	18.598	0	25.728	446210000	34	8	8	8	1	6	5	6	8	6	7	6	5	6	8	6	7	6	5	6	8	6	7	154	154	1	42	NaN	NaN	NaN	NaN
Q7V2B2	Dihydroorotase	Central Metabolism	0.0420128	0.051454	25.874	25.9479	-0.0738913	0.61422	1	1	1	3.9	3.9	3.9	34.643	0.0039841	2.9435	2977000	1	1	1	1	1	1	0	0	0	0	0	1	0	0	0	0	0	1	0	0	0	0	0	307	307	1	1	NaN	NaN	NaN	NaN
Q7V2B4	Probable glutathione reductase (NADPH)	Oxidative Stress	0.0224763	0.0211034	25.3964	25.0535	0.342932	0.320641	5	5	5	56.7	56.7	56.7	10.892	0	18.355	519980000	28	5	5	5	1	4	5	5	5	4	4	4	5	5	5	4	4	4	5	5	5	4	4	90	90	1	36	NaN	NaN	NaN	NaN
Q7V2C0	ATP phosphoribosyltransferase	Central Metabolism	0.0277736	0.0542744	24.3401	25.2784	-0.938351	0.327228	18	18	18	66.8	66.8	66.8	39.957	0	85.834	1030500000	56	18	18	18	1	11	13	7	14	13	14	11	13	7	14	13	14	11	13	7	14	13	14	349	349	1	87	NaN	NaN	NaN	NaN
Q7V2C1	Hydroxyacylglutathione hydrolase	Central Metabolism	0.002738	0.00258986	21.2356	21.0436	0	1	29	29	29	54.9	54.9	54.9	50.618	0	197.75	2305200000	147	29	29	29	1	26	25	28	25	26	25	26	25	28	25	26	25	26	25	28	25	26	25	459	459	1	198	NaN	NaN	NaN	NaN
Q7V2C2	Uncharacterized protein	Uncharacterized	0.10728	0.138021	25.7016	25.9441	-0.242466	0.573573	8	8	8	35.8	35.8	35.8	23.27	0	26.8	525250000	35	8	8	8	1	5	7	3	6	8	7	5	7	3	6	8	7	5	7	3	6	8	7	215	215	1	40	NaN	NaN	NaN	NaN
Q7V2C4	4a-hydroxytetrahydrobiopterin dehydratase	Central Metabolism	0.0268606	0.0246246	23.1116	22.7367	0.374833	0.271045	1	1	1	6.9	6.9	6.9	28.543	0.001368	3.5166	14917000	5	1	1	1	1	1	1	0	1	1	1	1	1	0	1	1	1	1	1	0	1	1	1	246	246	1	6	NaN	NaN	NaN	NaN
Q7V2C5	Putative carboxysome peptide B	Carbon Fixation	0.0136253	0.0174796	21.7078	21.7006	0.0072155	0.997393	8	8	8	79.2	79.2	79.2	13.995	0	61.786	901980000	37	8	8	8	1	5	5	5	6	7	7	5	5	5	6	7	7	5	5	5	6	7	7	130	130	1	45	NaN	NaN	NaN	NaN
Q7V2C6	Putative carboxysome peptide A	Carbon Fixation	0.0106362	0.0095259	21.7332	21.4603	0.27288	0.73573	3	3	3	34.2	34.2	34.2	9.5778	0	4.3737	74864000	14	3	3	3	1	3	3	3	3	3	3	3	3	3	3	3	3	3	3	3	3	3	3	79	79	1	19	NaN	NaN	NaN	NaN
Q7V2C7	Carboxysome shell protein CsoS3	Carbon Fixation	0.00633977	0.00202224	23.1426	21.8145	1.32808	0.46485	3	3	3	34.2	34.2	34.2	7.8749	0	8.3719	49193000	6	3	3	3	1	3	3	2	2	3	3	3	3	2	2	3	3	3	3	2	2	3	3	73	73	1	16	NaN	NaN	NaN	NaN
Q7V2C8	Carboxysome shell protein CsoS2	Carbon Fixation	0.0206416	0.00851991	25.7108	24.477	1.23374	0.39948	3	3	3	45.5	45.5	45.5	9.3957	0	13.807	29053000	8	3	3	3	1	1	3	1	1	3	3	1	3	1	1	3	3	1	3	1	1	3	3	88	88	1	12	NaN	NaN	NaN	NaN
Q7V2C9	Ribulose bisphosphate carboxylase, small chain	Carbon Fixation	0.100602	0.0519432	25.3911	24.3055	1.08557	0.332859	7	7	7	18.1	18.1	18.1	57.305	0	16.607	86067000	20	7	7	7	1	7	1	5	2	3	3	7	1	5	2	3	3	7	1	5	2	3	3	509	509	1	25	NaN	NaN	NaN	NaN
Q7V2D0	Ribulose bisphosphate carboxylase large chain	Carbon Fixation	0.304361	0.159825	28.9682	28.0163	0.951862	0.429467	47	47	47	70.6	70.6	70.6	81.881	0	323.31	3339400000	262	47	47	47	1	43	32	44	37	34	34	43	32	44	37	34	34	43	32	44	37	34	34	765	765	1	291	NaN	NaN	NaN	NaN
Q7V2D1	Carbon dioxide-concentrating mechanism protein CcmK	Carbon Fixation	2.6899	0.855083	30.0068	28.1705	1.83633	0.287234	4	4	4	44.2	44.2	44.2	12.939	0	44.402	263720000	20	4	4	4	1	4	3	4	2	2	2	4	3	4	2	2	2	4	3	4	2	2	2	113	113	1	23	NaN	NaN	NaN	NaN
Q7V2D3	Uncharacterized protein	Uncharacterized	0.0028841	0.00357983	21.4605	21.5975	0	1	35	35	35	55	55	55	52.573	0	304.45	13099000000	320	35	35	35	1	32	31	35	32	31	31	32	31	35	32	31	31	32	31	35	32	31	31	471	471	1	339	NaN	NaN	NaN	NaN
Q7V2D7	Light-independent protochlorophyllide reductase iron-sulfur ATP-binding protein	Central Metabolism	0.00206277	0.00219459	21.2886	21.1471	0	1	8	8	8	82.5	82.5	82.5	10.572	0	80.468	13067000000	185	8	8	8	1	8	7	8	7	7	7	8	7	8	7	7	7	8	7	8	7	7	7	103	103	1	161	NaN	NaN	NaN	NaN
Q7V2E2	Uncharacterized protein	Uncharacterized	0.0592614	0.0655545	26.5692	26.5149	0.0543048	0.945467	3	3	3	9.8	9.8	9.8	27.51	0.0065104	2.7256	28363000	5	3	3	3	1	2	1	3	1	1	1	2	1	3	1	1	1	2	1	3	1	1	1	256	256	1	9	NaN	NaN	NaN	NaN
Q7V2E3	N-(5-phosphoribosyl)anthranilate isomerase	Central Metabolism	0.00243258	0.00458751	21.1121	21.557	0	1	2	2	2	9.2	9.2	9.2	32.249	0	14.934	9597600	2	2	2	2	1	2	0	0	0	0	0	2	0	0	0	0	0	2	0	0	0	0	0	295	295	1	2	NaN	NaN	NaN	NaN
Q7V2E4	Putative GTP cyclohydrolase I	Central Metabolism	0.0469194	0.00380063	24.7394	21.3429	3.39643	0.280603	2	2	2	3.9	3.9	3.9	46.874	0.0013889	3.7561	1160800000	13	2	2	2	1	2	2	2	2	2	2	2	2	2	2	2	2	2	2	2	2	2	2	408	408	1	28	NaN	NaN	NaN	NaN
Q7V2E5	Putative short-chain dehydrogenase	Central Metabolism	0.00655348	0.0157144	22.132	23.6603	-1.52832	0.31244	4	4	4	13.2	13.2	13.2	24.886	0.0013908	3.8068	33093000	11	4	4	4	1	2	2	2	1	2	2	2	2	2	1	2	2	2	2	2	1	2	2	220	220	1	11	NaN	NaN	NaN	NaN
Q7V2E7	Uncharacterized protein	Uncharacterized	0.00501391	0.00658456	22.3178	22.9234	-0.605534	0.649123	14	14	14	58.5	58.5	58.5	28.066	0	73.254	490350000	49	14	14	14	1	14	4	12	2	5	9	14	4	12	2	5	9	14	4	12	2	5	9	246	246	1	65	NaN	NaN	NaN	NaN
Q7V2E8	Aldehyde decarbonylase	Central Metabolism	0.00317528	0.00328671	21.5494	21.3285	0	1	4	4	4	17.9	17.9	17.9	25.689	0	17.627	119610000	16	4	4	4	1	4	3	1	4	4	4	4	3	1	4	4	4	4	3	1	4	4	4	235	235	1	23	NaN	NaN	NaN	NaN
Q7V2E9	Creatininase	Central Metabolism	0.0317747	0.0214994	25.0451	24.2668	0.778276	0.3336	9	9	9	27.5	27.5	27.5	38.361	0	17.742	76716000	21	9	9	9	1	6	6	1	4	4	4	6	6	1	4	4	4	6	6	1	4	4	4	346	346	1	25	NaN	NaN	NaN	NaN
Q7V2F0	30S ribosomal protein S1 homolog B, putative Nbp1	Basic Cellular Processes	0.00118618	0.00179503	20.8774	21.3025	0	1	4	4	4	19.7	19.7	19.7	26.962	0	8.4371	54361000	3	4	4	4	1	4	2	1	0	1	1	4	2	1	0	1	1	4	2	1	0	1	1	238	238	1	9	NaN	NaN	NaN	NaN
Q7V2F4	Acetolactate synthase	Central Metabolism	0.00112006	0.000928403	21.2731	20.8994	0	1	13	13	13	52.1	52.1	52.1	29.453	0	90.527	877660000	80	13	13	13	1	12	13	13	12	13	12	12	13	13	12	13	12	12	13	13	12	13	12	265	265	1	108	NaN	NaN	NaN	NaN
Q7V2F8	Uridylate kinase	Energy Production and Conversion	0.367639	0.580666	28.3723	28.8599	-0.48762	0.253757	3	3	3	8.6	8.6	8.6	45.119	0	8.0675	11735000	4	3	3	3	1	3	0	1	0	0	0	3	0	1	0	0	0	3	0	1	0	0	0	405	405	1	4	NaN	NaN	NaN	NaN
Q7V2F9	Ribosome-recycling factor	Basic Cellular Processes	0.218658	0.0919187	27.1889	25.7667	1.42217	0.283766	4	4	4	7.3	7.3	7.3	64.303	0	20.614	23048000	5	4	4	4	1	4	0	1	1	0	0	4	0	1	1	0	0	4	0	1	1	0	0	587	587	1	6	NaN	NaN	NaN	NaN
Q7V2G1	Transaldolase	Central Metabolism	0.199495	0.340603	27.9086	28.6028	-0.694222	0.279293	13	13	13	66.2	66.2	66.2	25.356	0	119.23	3861800000	105	13	13	13	1	10	11	8	12	12	13	10	11	8	12	12	13	10	11	8	12	12	13	234	234	1	115	NaN	NaN	NaN	NaN
Q7V2G5	Possible alpha-ribazole-5-P phosphatase	Central Metabolism	0.0367797	0.0735762	25.5966	26.7987	-1.20213	0.3238	11	11	11	56.6	56.6	56.6	20.609	0	170.23	2272800000	93	11	11	11	1	10	10	11	10	10	10	10	10	11	10	10	10	10	10	11	10	10	10	182	182	1	94	NaN	NaN	NaN	NaN
Q7V2G6	Putative dihydroorotase	Central Metabolism	0.00677292	0.0142631	22.3495	24.3542	-2.00466	0.403023	37	37	37	85	85	85	37.181	0	323.31	16311000000	321	37	37	37	1	32	37	26	36	36	36	32	37	26	36	36	36	32	37	26	36	36	36	333	333	1	351	NaN	NaN	NaN	NaN
Q7V2G9	Inorganic pyrophosphatase	Inorganic Nutrient Processing	0.00300957	0.00519463	20.9774	21.6379	0	1	27	27	27	54.5	54.5	54.5	50.311	0	199.24	4190100000	157	27	27	27	1	21	24	8	25	27	26	21	24	8	25	27	26	21	24	8	25	27	26	442	442	1	186	NaN	NaN	NaN	NaN
Q7V2H0	Proline--tRNA ligase	Basic Cellular Processes	0.0175602	0.0361555	24.2942	26.2182	-1.92399	0.404157	18	18	18	54.2	54.2	54.2	47.109	0	84.561	812710000	99	18	18	18	1	12	15	3	15	17	18	12	15	3	15	17	18	12	15	3	15	17	18	417	417	1	105	NaN	NaN	NaN	NaN
Q7V2H1	Adenylosuccinate synthetase	Central Metabolism	0.0370866	0.0550164	25.6428	26.3664	-0.723543	0.463944	1	1	1	3.8	3.8	3.8	20.346	0.008872	2.3249	6570800	2	1	1	1	1	1	0	1	0	0	0	1	0	1	0	0	0	1	0	1	0	0	0	182	182	1	2	NaN	NaN	NaN	NaN
Q7V2H2	Possible carbohydrate kinase	Central Metabolism	0.00147751	0.00396394	20.8233	22.1355	-1.31222	0.253686	38	38	38	61.2	61.2	61.2	68.207	0	323.31	3426600000	174	38	38	38	1	24	35	5	33	35	34	24	35	5	33	35	34	24	35	5	33	35	34	600	600	1	213	NaN	NaN	NaN	NaN
Q7V2I0	RNA polymerase sigma factor SigA	Basic Cellular Processes	0.00154703	0.00181314	21.2742	21.0754	0	1	32	32	32	64.2	64.2	64.2	47.867	0	322.23	6694900000	257	32	32	32	1	32	32	21	31	31	31	32	32	21	31	31	31	32	32	21	31	31	31	436	436	1	312	NaN	NaN	NaN	NaN
Q7V2I1	Porphobilinogen deaminase	Central Metabolism	0.0565416	0.0302413	26.09	25.0175	1.07247	0.275133	3	3	3	18	18	18	37.406	0	7.2446	43285000	10	3	3	3	1	1	1	0	1	2	3	1	1	0	1	2	3	1	1	0	1	2	3	338	338	1	10	NaN	NaN	NaN	NaN
Q7V2I2	Putative inorganic pyrophosphatase	Inorganic Nutrient Processing	0.270345	0.414003	27.566	28.1119	-0.545903	0.37431	3	3	3	9.6	9.6	9.6	45.751	0	6.8566	16381000	3	3	3	3	1	3	0	0	0	0	0	3	0	0	0	0	0	3	0	0	0	0	0	396	396	1	4	NaN	NaN	NaN	NaN
Q7V2I3	Carboxypeptidase 1	Basic Cellular Processes	0.0210138	0.0384161	25.0001	26.0483	-1.04816	0.327504	28	28	28	75	75	75	34.949	0	180.22	2455000000	189	28	28	28	1	26	27	25	19	24	22	26	27	25	19	24	22	26	27	25	19	24	22	316	316	1	199	NaN	NaN	NaN	NaN
Q7V2I4	Uncharacterized protein	Uncharacterized	0.0342697	0.0173582	24.4776	22.7318	1.7458	0.328285	14	14	14	75.9	75.9	75.9	22.147	0	195.97	4819700000	112	14	14	14	1	12	12	7	14	14	13	12	12	7	14	14	13	12	12	7	14	14	13	195	195	1	117	NaN	NaN	NaN	NaN
Q7V2I5	Putative pterin-4-alpha-carbinolamine dehydratase	Central Metabolism	0.0347674	0.0795859	23.4552	24.7135	-1.25837	0.27408	21	21	21	41.5	41.5	41.5	57.917	0	98.353	2440300000	96	21	21	21	1	13	18	10	20	20	20	13	18	10	20	20	20	13	18	10	20	20	20	501	501	1	118	NaN	NaN	NaN	NaN
Q7V2I6	Uncharacterized protein	Uncharacterized	0.00171726	0.00231205	21.236	21.4537	0	1	4	4	4	34.8	34.8	34.8	18.545	0	40.098	191250000	27	4	4	4	1	4	3	3	1	2	4	4	3	3	1	2	4	4	3	3	1	2	4	161	161	1	27	NaN	NaN	NaN	NaN
Q7V2I9	Uncharacterized protein	Uncharacterized	0.0149216	0.0167359	24.5974	24.5367	0.0607045	0.86599	4	4	4	69.8	69.8	69.8	11.246	0	24.339	446010000	28	4	4	4	1	2	4	1	4	4	4	2	4	1	4	4	4	2	4	1	4	4	4	96	96	1	42	NaN	NaN	NaN	NaN
Q7V2J0	Uncharacterized protein	Uncharacterized	0.0298393	0.0282447	24.5527	24.2703	0.282431	0.428712	3	3	3	4.4	4.4	4.4	41.331	0	5.8844	12297000	3	3	3	3	1	2	1	0	0	0	2	2	1	0	0	0	2	2	1	0	0	0	2	364	364	1	5	NaN	NaN	NaN	NaN
Q7V2J2	Exodeoxyribonuclease III	Basic Cellular Processes	0.023611	0.015441	24.7011	23.7494	0.951707	0.326846	11	11	11	34.6	34.6	34.6	46.74	0	37.321	333730000	37	11	11	11	1	10	5	5	6	7	9	10	5	5	6	7	9	10	5	5	6	7	9	407	407	1	47	NaN	NaN	NaN	NaN
Q7V2J3	Glutamate-1-semialdehyde 2,1-aminomutase	Central Metabolism	0.176453	0.280564	28.1107	28.7057	-0.59497	0.319983	7	7	7	27.1	27.1	27.1	23.209	0	21.595	294230000	26	7	7	7	1	5	5	4	4	4	4	5	5	4	4	4	4	5	5	4	4	4	4	199	199	1	33	NaN	NaN	NaN	NaN
Q7V2J4	Band 7 protein	Other	0.00821991	0.00680726	23.112	22.6152	0.49674	0.479965	11	11	11	43.8	43.8	43.8	32.521	0	32.666	338080000	40	11	11	11	1	9	8	7	3	10	11	9	8	7	3	10	11	9	8	7	3	10	11	281	281	1	53	NaN	NaN	NaN	NaN
Q7V2J5	UPF0234 protein PMM0481	Other	0.201767	0.114164	26.9896	26.0139	0.975728	0.317949	26	26	26	70	70	70	46.264	0	323.31	16942000000	257	26	26	26	1	24	24	20	24	26	26	24	24	20	24	26	26	24	24	20	24	26	26	433	433	1	287	NaN	NaN	NaN	NaN
Q7V2J6	Uncharacterized protein	Uncharacterized	0.0157809	0.00405642	22.7895	21.1297	1.6598	0.397779	7	7	7	41	41	41	29.085	0	34.464	119700000	27	7	7	7	1	4	5	6	5	5	6	4	5	6	5	5	6	4	5	6	5	5	6	268	268	1	31	NaN	NaN	NaN	NaN
Q7V2J7	Uncharacterized protein	Uncharacterized	0.00325425	0.00403495	22.0849	22.341	-0.256109	0.70914	14	14	14	48.5	48.5	48.5	19.022	0	63.219	2226500000	84	14	14	14	1	14	13	13	12	13	13	14	13	13	12	13	13	14	13	13	12	13	13	165	165	1	85	NaN	NaN	NaN	NaN
Q7V2J9	Methionine aminopeptidase	Central Metabolism	0.0467136	0.0102164	25.3206	23.2886	2.03202	0.253895	3	3	3	28.8	28.8	28.8	18.669	0	41.973	48004000	6	3	3	3	1	3	1	2	1	1	1	3	1	2	1	1	1	3	1	2	1	1	1	170	170	1	9	NaN	NaN	NaN	NaN
Q7V2K1	50S ribosomal protein L19	Basic Cellular Processes	0.225028	0.124348	27.1477	26.0968	1.05095	0.253591	7	7	7	21.1	21.1	21.1	40.553	0	20.246	89858000	13	7	7	7	1	1	6	0	4	5	5	1	6	0	4	5	5	1	6	0	4	5	5	369	369	1	22	NaN	NaN	NaN	NaN
Q7V2K2	Uncharacterized protein	Uncharacterized	0.14368	0.0224615	24.8987	21.9116	2.98712	0.3194	14	14	14	50.5	50.5	50.5	30.818	0	99.007	563290000	40	14	14	14	1	13	7	11	6	8	6	13	7	11	6	8	6	13	7	11	6	8	6	279	279	1	61	NaN	NaN	NaN	NaN
Q7V2K3	Glutamate--tRNA ligase	Basic Cellular Processes	0.0146294	0.0330422	24.0594	25.7604	-1.70102	0.331751	14	14	14	59.4	59.4	59.4	18.513	0	84.36	2103900000	91	14	14	14	1	14	11	14	12	12	13	14	11	14	12	12	13	14	11	14	12	12	13	160	160	1	115	NaN	NaN	NaN	NaN
Q7V2K6	tRNA N6-adenosine threonylcarbamoyltransferase	Basic Cellular Processes	0.00337962	0.00374005	21.9359	22.1269	-0.190952	0.875203	5	5	5	74.2	74.2	74.2	6.8158	0	14.723	160940000	13	5	5	5	1	5	3	4	1	1	3	5	3	4	1	1	3	5	3	4	1	1	3	62	62	1	20	NaN	NaN	NaN	NaN
Q7V2K9	Guanylate kinase	Energy Production and Conversion	0.0965792	0.0464185	26.0632	24.719	1.3442	0.320593	22	22	22	40	40	40	55.383	0	128.9	1763100000	84	22	22	22	1	15	18	4	18	19	18	15	18	4	18	19	18	15	18	4	18	19	18	478	478	1	113	NaN	NaN	NaN	NaN
Q7V2L8	Putative exopolyphosphatase	Inorganic Nutrient Processing	0.00687738	0.00729424	23.7047	23.5913	0.113431	0.916265	3	3	3	11.5	11.5	11.5	38.732	0	12.036	49975000	12	3	3	3	1	3	2	0	2	2	2	3	2	0	2	2	2	3	2	0	2	2	2	356	356	1	15	NaN	NaN	NaN	NaN
Q7V2M0	Uncharacterized protein	Uncharacterized	0.00234486	0.00206276	21.4023	20.8783	0	1	7	7	7	39.7	39.7	39.7	21.228	0	28.649	474540000	26	7	7	7	1	7	5	5	3	4	4	7	5	5	3	4	4	7	5	5	3	4	4	184	184	1	35	NaN	NaN	NaN	NaN
Q7V2M1	2-C-methyl-D-erythritol 4-phosphate cytidylyltransferase	Central Metabolism	0.0105189	0.0132857	22.8565	23.2745	-0.418004	0.747219	13	13	13	27.1	27.1	27.1	60.411	0	32.185	343310000	40	13	13	13	1	12	10	5	5	9	11	12	10	5	5	9	11	12	10	5	5	9	11	532	532	1	62	NaN	NaN	NaN	NaN
Q7V2M2	3-oxoacyl-[acyl-carrier protein] reductase	Central Metabolism	0.0459485	0.0963149	25.1745	26.3643	-1.18977	0.282942	3	3	3	15.9	15.9	15.9	32.528	0	8.042	22754000	4	3	3	3	1	1	1	0	3	2	1	1	1	0	3	2	1	1	1	0	3	2	1	290	290	1	8	NaN	NaN	NaN	NaN
Q7V2M3	60 kDa chaperonin 1	Basic Cellular Processes	0.168664	0.434686	27.9749	29.7584	-1.78346	0.278482	6	6	6	29.1	29.1	29.1	24.917	0	22.43	140430000	15	6	6	6	1	5	4	1	4	4	5	5	4	1	4	4	5	5	4	1	4	4	5	223	223	1	23	NaN	NaN	NaN	NaN
Q7V2N7	DNA topoisomerase 1	Basic Cellular Processes	0.00166398	0.00109124	21.7504	21.6828	0.0675735	0.974216	15	15	15	61.8	61.8	61.8	26.469	0	239.48	2573800000	107	15	15	15	1	14	15	7	15	15	15	14	15	7	15	15	15	14	15	7	15	15	15	249	249	1	126	NaN	NaN	NaN	NaN
Q7V2N9	Possible ABC transporter, ATP binding protein	Membrane Transport	0.00287663	0.00237508	21.4059	20.6003	0	1	62	61	61	77.5	77.5	77.5	61.44	0	323.31	60544000000	561	62	61	61	1	51	57	34	61	61	61	50	56	33	60	60	60	50	56	33	60	60	60	581	581	1	555	NaN	NaN	NaN	NaN
Q7V2P2	Imidazole glycerol phosphate synthase subunit HisF	Central Metabolism	0.0112569	0.00887872	23.3817	22.8739	0.507749	0.519252	7	7	7	8.9	8.9	8.9	97.829	0	21.268	48580000	13	7	7	7	1	6	2	0	2	3	4	6	2	0	2	3	4	6	2	0	2	3	4	870	870	1	18	NaN	NaN	NaN	NaN
Q7V2P6	Sun protein (Fmu protein)	Other	0.00337345	0.00437904	22.3373	22.6846	-0.347346	0.648266	3	3	3	20.6	20.6	20.6	25.031	0.0040268	3.2133	60073000	4	3	3	3	1	1	2	0	2	2	1	1	2	0	2	2	1	1	2	0	2	2	1	228	228	1	9	NaN	NaN	NaN	NaN
Q7V2P7	Uncharacterized protein	Uncharacterized	0.00404141	0.0028991	23.0203	22.2919	0.728369	0.293167	13	13	13	51	51	51	27.306	0	45.433	203350000	29	13	13	13	1	13	8	3	4	9	10	13	8	3	4	9	10	13	8	3	4	9	10	255	255	1	47	NaN	NaN	NaN	NaN
Q7V2Q2	Probable malate:quinone oxidoreductase	Energy Production and Conversion	0.00131926	0.000966606	21.3205	20.6972	0	1	5	5	5	14.9	14.9	14.9	49.372	0	14.059	63745000	10	5	5	5	1	3	4	0	3	5	2	3	4	0	3	5	2	3	4	0	3	5	2	437	437	1	17	NaN	NaN	NaN	NaN
Q7V2Q5	Uncharacterized protein	Uncharacterized	0.00645012	0.0134948	22.0844	23.6137	-1.52935	0.34473	10	10	10	22.4	22.4	22.4	58.695	0	39.886	156110000	34	10	10	10	1	8	8	6	7	9	9	8	8	6	7	9	9	8	8	6	7	9	9	496	496	1	50	NaN	NaN	NaN	NaN
Q7V2Q6	Putative L-cysteine/cystine lyase	Central Metabolism	0.00327754	0.0046869	22.0429	22.4558	-0.412894	0.770674	2	2	2	5.8	5.8	5.8	55.614	0	5.1282	8413700	3	2	2	2	1	2	0	0	1	1	1	2	0	0	1	1	1	2	0	0	1	1	1	497	497	1	5	NaN	NaN	NaN	NaN
Q7V2Q7	Putative short chain dehydrogenase	Central Metabolism	0.0192394	0.0499993	23.044	25.327	-2.28293	0.334307	6	6	6	22	22	22	29.481	0	11.252	111630000	8	6	6	6	1	4	2	2	4	5	3	4	2	2	4	5	3	4	2	2	4	5	3	264	264	1	20	NaN	NaN	NaN	NaN
Q7V2Q8	UDP-N-acetylmuramoyl-L-alanyl-D-glutamate--2,6-diaminopimelate ligase	Central Metabolism	0.00171342	0.00267899	21.6806	22.2308	-0.550161	0.328717	4	4	4	10.9	10.9	10.9	45.265	0	6.8776	91209000	8	4	4	4	1	3	4	1	3	3	2	3	4	1	3	3	2	3	4	1	3	3	2	393	393	1	16	NaN	NaN	NaN	NaN
Q7V2Q9	Uncharacterized protein	Uncharacterized	0.00872548	0.00860377	21.8323	21.4915	0	1	15	15	15	66.2	66.2	66.2	26.254	0	60.142	1209600000	66	15	15	15	1	10	13	2	15	14	15	10	13	2	15	14	15	10	13	2	15	14	15	234	234	1	89	NaN	NaN	NaN	NaN
Q7V2R1	30S ribosomal protein S4	Basic Cellular Processes	0.0448601	0.0420643	25.1968	24.8474	0.349337	0.320817	4	4	4	8.4	8.4	8.4	57.651	0	7.835	54306000	8	4	4	4	1	2	4	1	3	3	3	2	4	1	3	3	3	2	4	1	3	3	3	511	511	1	16	NaN	NaN	NaN	NaN
Q7V2R2	Cysteine synthase	Central Metabolism	0.278025	0.601906	28.1196	29.404	-1.28437	0.285595	2	2	2	15	15	15	12.037	0.0064599	2.6722	36289000	6	2	2	2	1	1	1	1	1	1	2	1	1	1	1	1	2	1	1	1	1	1	2	100	100	1	7	NaN	NaN	NaN	NaN
Q7V2R3	S-adenosylmethionine:tRNA ribosyltransferase-isomerase	Central Metabolism	0.00207422	0.00352299	21.5724	22.1802	-0.607833	0.266176	6	6	6	28.7	28.7	28.7	22.856	0	21.476	393920000	19	6	6	6	1	4	4	3	4	5	5	4	4	3	4	5	5	4	4	3	4	5	5	202	202	1	25	NaN	NaN	NaN	NaN
Q7V2R4	Dihydrolipoamide acetyltransferase component of pyruvate dehydrogenase complex	Central Metabolism	0.00301395	0.00161312	22.3258	21.2732	1.05262	0.320824	28	28	28	91.5	91.5	91.5	34.981	0	323.31	19689000000	363	28	28	28	1	21	25	14	27	26	27	21	25	14	27	26	27	21	25	14	27	26	27	328	328	1	342	NaN	NaN	NaN	NaN
Q7V2R6	Uncharacterized protein	Uncharacterized	0.081584	0.0335401	25.3793	24.0807	1.29855	0.329	4	4	4	18.2	18.2	18.2	42.624	0	12.281	51754000	8	4	4	4	1	2	3	0	3	4	4	2	3	0	3	4	4	2	3	0	3	4	4	374	374	1	16	NaN	NaN	NaN	NaN
Q7V2S0	Deoxyribose-phosphate aldolase	Central Metabolism	0.0032968	0.00261268	21.5399	20.9131	0	1	10	10	10	32.5	32.5	32.5	49.185	0	37.876	191830000	11	10	10	10	1	10	1	4	1	1	1	10	1	4	1	1	1	10	1	4	1	1	1	455	455	1	19	NaN	NaN	NaN	NaN
Q7V2S1	Pyrroline-5-carboxylate reductase	Central Metabolism	0.0489751	0.0487249	25.7297	25.4513	0.278406	0.485528	6	6	6	39.9	39.9	39.9	16.628	0	72.114	415990000	26	6	6	6	1	5	3	5	4	4	3	5	3	5	4	4	3	5	3	5	4	4	3	148	148	1	31	NaN	NaN	NaN	NaN
Q7V2S3	Uncharacterized protein	Uncharacterized	0.00772825	0.0100532	22.6821	22.8422	-0.160076	0.708183	2	2	2	11	11	11	24.502	0.0040214	3.194	23887000	4	2	2	2	1	0	2	0	1	1	1	0	2	0	1	1	1	0	2	0	1	1	1	219	219	1	5	NaN	NaN	NaN	NaN
Q7V2S4	Uncharacterized protein	Uncharacterized	0.0411541	0.0236267	23.0463	21.9633	1.08293	0.722717	15	15	15	52.2	52.2	52.2	29.729	0	94.76	1377600000	91	15	15	15	1	11	13	14	12	13	13	11	13	14	12	13	13	11	13	14	12	13	13	268	268	1	100	NaN	NaN	NaN	NaN
Q7V2S9	3-dehydroquinate dehydratase	Central Metabolism	0.00492452	0.00337232	21.5343	20.5773	0	1	5	5	5	28.8	28.8	28.8	24.432	0	36.077	116590000	19	5	5	5	1	4	5	3	3	4	5	4	5	3	3	4	5	4	5	3	3	4	5	212	212	1	30	NaN	NaN	NaN	NaN
Q7V2T1	Possible uncharacterized restriction enzyme, interrupted-C	Basic Cellular Processes	0.00174091	0.0010322	21.9852	21.4931	0.492093	0.734811	3	3	3	35.2	35.2	35.2	10.551	0	5.2301	71478000	6	3	3	3	1	3	1	2	0	1	2	3	1	2	0	1	2	3	1	2	0	1	2	88	88	1	9	NaN	NaN	NaN	NaN
Q7V2T4	Uncharacterized protein	Uncharacterized	0.187819	0.205728	26.882	26.7716	0.110399	0.816673	2	2	2	12.3	12.3	12.3	16.128	0	5.0377	37947000	4	2	2	2	1	1	1	1	2	1	1	1	1	1	2	1	1	1	1	1	2	1	1	146	146	1	7	NaN	NaN	NaN	NaN
Q7V2T5	Uncharacterized protein	Uncharacterized	0.0215608	0.0358824	22.8013	23.5135	-0.712151	0.335653	8	8	8	13.3	13.3	13.3	95.6	0	90.571	46155000	11	8	8	8	1	8	0	1	1	2	3	8	0	1	1	2	3	8	0	1	1	2	3	829	829	1	15	NaN	NaN	NaN	NaN
Q7V2T6	Uncharacterized protein	Uncharacterized	0.242821	0.208464	26.4332	25.999	0.434132	0.472728	16	16	16	88.4	88.4	88.4	18.592	0	136.92	5123700000	187	16	16	16	1	16	15	16	15	15	16	16	15	16	15	15	16	16	15	16	15	15	16	155	155	1	174	NaN	NaN	NaN	NaN
Q7V2T7	Uncharacterized protein	Uncharacterized	0.0668378	0.0553386	24.549	24.0017	0.54737	0.275634	3	3	3	31.2	31.2	31.2	10.945	0	15.007	219300000	22	3	3	3	1	2	3	1	3	3	3	2	3	1	3	3	3	2	3	1	3	3	3	93	93	1	29	NaN	NaN	NaN	NaN
Q7V2U0	Cyanate hydratase	Central Metabolism	0.141239	0.132489	26.3876	26.058	0.32955	0.428978	4	4	4	80	80	80	10.076	0	31.287	741860000	38	4	4	4	1	2	3	4	4	4	4	2	3	4	4	4	4	2	3	4	4	4	4	90	90	1	35	NaN	NaN	NaN	NaN
Q7V2U3	Putative cyanate ABC transporter, substrate binding protein	Membrane Transport	0.000931976	0.000763663	20.6626	20.524	0	1	3	3	3	50.6	50.6	50.6	10.014	0	16.562	249860000	27	3	3	3	1	3	3	2	3	3	3	3	3	2	3	3	3	3	3	2	3	3	3	87	87	1	31	NaN	NaN	NaN	NaN
Q7V2U4	Uncharacterized protein	Uncharacterized	0.165132	0.15483	26.0563	25.749	0.307358	0.56209	5	5	5	32.7	32.7	32.7	16.536	0	28.851	1268500000	59	5	5	5	1	5	5	5	5	4	4	5	5	5	5	4	4	5	5	5	5	4	4	147	147	1	68	NaN	NaN	NaN	NaN
Q7V2U5	Uncharacterized protein	Uncharacterized	0.0335365	0.0618901	22.9602	24.7737	-1.81356	0.442657	2	2	2	5.3	5.3	5.3	61.613	0.0013947	3.9115	15467000	3	2	2	2	1	1	1	2	1	0	1	1	1	2	1	0	1	1	1	2	1	0	1	561	561	1	6	NaN	NaN	NaN	NaN
Q7V2U6	Type-1 copper (Blue) domain	Other	0.275432	0.180772	27.2116	26.3696	0.842067	0.256505	4	4	4	55.9	55.9	55.9	11.526	0	44.224	509000000	25	4	4	4	1	2	4	4	3	4	4	2	4	4	3	4	4	2	4	4	3	4	4	102	102	1	31	NaN	NaN	NaN	NaN
Q7V2U7	Possible DsrE-like protein	Other	0.177087	0.174679	26.4637	26.2292	0.234486	0.392812	3	3	3	24.8	24.8	24.8	14.4	0	62.757	264960000	16	3	3	3	1	2	3	1	2	3	3	2	3	1	2	3	3	2	3	1	2	3	3	129	129	1	20	NaN	NaN	NaN	NaN
Q7V2U8	Possible MarR family	Other	0.00703226	0.00660281	21.8354	21.5798	0	1	7	7	7	73.1	73.1	73.1	14.284	0	84.787	1644300000	37	7	7	7	1	5	5	6	6	5	5	5	5	6	6	5	5	5	5	6	6	5	5	134	134	1	38	NaN	NaN	NaN	NaN
Q7V2V0	Uncharacterized protein	Uncharacterized	0.00382128	0.00751837	21.1736	21.8441	0	1	5	5	5	52.8	52.8	52.8	13.625	0	62.324	1366500000	45	5	5	5	1	4	4	5	4	5	4	4	4	5	4	5	4	4	4	5	4	5	4	125	125	1	56	NaN	NaN	NaN	NaN
Q7V2V3	TENA/THI-4 protein	Other	0.00518014	0.00257562	21.9647	20.8316	0	1	2	2	2	15	15	15	15.585	0	7.9299	20449000	4	2	2	2	1	1	1	0	1	1	1	1	1	0	1	1	1	1	1	0	1	1	1	133	133	1	7	NaN	NaN	NaN	NaN
Q7V2V4	Uncharacterized protein	Uncharacterized	0.00905685	0.0100216	22.0466	21.9088	0.137884	0.754974	1	1	1	6.5	6.5	6.5	17.877	0.0052701	2.8307	4984700	3	1	1	1	1	1	0	0	0	1	1	1	0	0	0	1	1	1	0	0	0	1	1	154	154	1	3	NaN	NaN	NaN	NaN
Q7V2W1	Putative bacterioferritin comigratory protein	Oxidative Stress	0.00996639	0.00523361	22.4411	21.4166	1.02459	0.317406	3	3	3	24.6	24.6	24.6	24.155	0.010025	2.1701	6638000	3	3	3	3	1	0	0	0	1	0	2	0	0	0	1	0	2	0	0	0	1	0	2	207	207	1	3	NaN	NaN	NaN	NaN
Q7V2W2	Sec-independent protein translocase protein TatA	Membrane Transport	0.00633385	0.0090608	20.8803	21.5054	0	1	2	2	2	25.7	25.7	25.7	12.88	0	6.3725	25235000	6	2	2	2	1	2	2	1	1	1	2	2	2	1	1	1	2	2	2	1	1	1	2	113	113	1	9	NaN	NaN	NaN	NaN
Q7V2W5	Bacterial-type phytoene dehydrogenase	Central Metabolism	0.0018134	0.0021846	21.8822	21.9283	0	1	3	3	3	16.8	16.8	16.8	16.81	0	8.289	25991000	4	3	3	3	1	3	0	2	0	0	1	3	0	2	0	0	1	3	0	2	0	0	1	149	149	1	6	NaN	NaN	NaN	NaN
Q7V2X2	Possible LysM domain	Central Metabolism	0.147885	0.0820119	27.1993	26.1491	1.05017	0.252954	2	2	2	11.5	11.5	11.5	10.752	0.01	2.152	116520000	6	2	2	2	1	2	1	1	1	1	1	2	1	1	1	1	1	2	1	1	1	1	1	96	96	1	7	NaN	NaN	NaN	NaN
Q7V2X3	Photosystem I reaction center subunit IV	Photosynthesis	0.107727	0.033983	24.7893	22.8722	1.91712	0.282909	1	1	1	2.5	2.5	2.5	56.264	0.006502	2.717	9082600	2	1	1	1	1	1	0	0	0	1	1	1	0	0	0	1	1	1	0	0	0	1	1	510	510	1	3	NaN	NaN	NaN	NaN
Q7V2X7	Uncharacterized protein	Uncharacterized	0.00886719	0.0118551	23.7779	24.0814	-0.303535	0.561789	19	19	19	57.3	57.3	57.3	29.277	0	232.43	1607800000	96	19	19	19	1	17	14	18	12	12	10	17	14	18	12	12	10	17	14	18	12	12	10	253	253	1	120	NaN	NaN	NaN	NaN
Q7V2X8	Probable septum site-determining protein Min	Other	0.00336608	0.00409066	21.4582	21.5918	0	1	3	3	3	72.5	72.5	72.5	7.6054	0	18.026	184330000	17	3	3	3	1	3	3	3	2	2	3	3	3	3	2	2	3	3	3	3	2	2	3	69	69	1	23	NaN	NaN	NaN	NaN
Q7V2X9	Site-determining protein	Other	0.00398305	0.00203253	21.7062	20.9061	0	1	12	12	12	35.1	35.1	35.1	48.909	0	58.75	392720000	47	12	12	12	1	6	10	4	8	9	11	6	10	4	8	9	11	6	10	4	8	9	11	419	419	1	52	NaN	NaN	NaN	NaN
Q7V2Y0	Cell division topological specificity factor	Basic Cellular Processes	0.0391444	0.00936423	23.8788	21.6695	2.20934	0.304372	1	1	1	6.8	6.8	6.8	24.673	0	8.4277	0	1	1	1	1	1	0	1	0	0	0	0	0	1	0	0	0	0	0	1	0	0	0	0	220	220	1	1	NaN	NaN	NaN	NaN
Q7V2Y1	Uncharacterized protein	Uncharacterized	0.02036	0.0200156	23.9156	23.6864	0.22923	0.734524	2	2	2	13.7	13.7	13.7	29.758	0	8.5563	10133000	2	2	2	2	1	0	0	2	0	1	0	0	0	2	0	1	0	0	0	2	0	1	0	271	271	1	3	NaN	NaN	NaN	NaN
Q7V2Y7	30S ribosomal protein S1, homolog A	Basic Cellular Processes	0.0183084	0.0161463	24.6527	24.3032	0.349474	0.562513	5	5	5	47.2	47.2	47.2	12.164	0	9.5191	80234000	8	5	5	5	1	4	4	5	1	1	3	4	4	5	1	1	3	4	4	5	1	1	3	106	106	1	20	NaN	NaN	NaN	NaN
Q7V2Y8	S-adenosylmethionine synthase	Central Metabolism	0.809311	0.739336	30.4066	30.0369	0.369705	0.417286	8	8	8	58.2	58.2	58.2	21.377	0	32.183	184100000	22	8	8	8	1	6	5	2	4	6	7	6	5	2	4	6	7	6	5	2	4	6	7	194	194	1	30	NaN	NaN	NaN	NaN
Q7V2Y9	Carbohydrate kinase, FGGY family	Central Metabolism	0.00200227	0.00263031	21.6768	21.8775	0	1	21	21	21	59.5	59.5	59.5	40.875	0	119.01	965940000	104	21	21	21	1	19	18	13	17	20	20	19	18	13	17	20	20	19	18	13	17	20	20	363	363	1	142	NaN	NaN	NaN	NaN
Q7V2Z2	Phycoerythrobilin lyase CpeS	Photosynthesis	0.00243828	0.00389355	20.6285	21.2896	0	1	42	42	42	69.7	69.7	69.7	45.083	0	323.31	58591000000	509	42	42	42	1	38	39	38	41	41	42	38	39	38	41	41	42	38	39	38	41	41	42	413	413	1	506	NaN	NaN	NaN	NaN
Q7V2Z6	S-methyl-5-thioadenosine phosphorylase	Central Metabolism	0.0228971	0.0519572	24.2389	25.7645	-1.52555	0.324626	1	1	1	3.9	3.9	3.9	45.187	0.0088161	2.2479	4415700	1	1	1	1	1	1	0	0	0	0	1	1	0	0	0	0	1	1	0	0	0	0	1	409	409	1	2	NaN	NaN	NaN	NaN
Q7V304	NAD(P)H-quinone oxidoreductase subunit J	Photosynthesis	0.00308334	0.00298947	20.9419	20.8403	0	1	2	2	2	18	18	18	21.154	0	27.767	13969000	5	2	2	2	1	2	1	1	0	1	1	2	1	1	0	1	1	2	1	1	0	1	1	183	183	1	7	NaN	NaN	NaN	NaN
Q7V308	Possible 2-amino-4-hydroxy-6-hydroxymethyldihydropteridine pyrophosphokinase	Central Metabolism	0.003169	0.00413602	21.1823	21.4053	0	1	14	14	14	45.3	45.3	45.3	34.528	0	101.18	1511500000	79	14	14	14	1	11	13	6	12	14	13	11	13	6	12	14	13	11	13	6	12	14	13	307	307	1	96	NaN	NaN	NaN	NaN
Q7V309	NUDIX hydrolase	Basic Cellular Processes	0.165727	0.168131	26.9778	26.7494	0.228406	0.579285	1	1	1	5.1	5.1	5.1	20.251	0.0039683	2.8837	3605000	2	1	1	1	1	1	0	1	0	0	0	1	0	1	0	0	0	1	0	1	0	0	0	176	176	1	2	NaN	NaN	NaN	NaN
Q7V310	Putative DNA photolyase	Basic Cellular Processes	0.00345997	0.00449385	22.6185	22.8743	-0.255798	0.615866	1	1	1	7	7	7	22.019	0	4.348	36051000	5	1	1	1	1	1	1	0	1	1	1	1	1	0	1	1	1	1	1	0	1	1	1	187	187	1	5	NaN	NaN	NaN	NaN
Q7V311	Putative pleiotropic regulatory protein	Central Metabolism	0.0231942	0.0378832	25.0049	25.7038	-0.698891	0.369769	14	14	14	62.6	62.6	62.6	21.259	0	70.014	3198700000	92	14	14	14	1	12	14	12	14	14	14	12	14	12	14	14	14	12	14	12	14	14	14	187	187	1	105	NaN	NaN	NaN	NaN
Q7V312	Uncharacterized protein	Uncharacterized	0.00303716	0.00470303	21.2697	21.6381	0	1	9	9	9	24.9	24.9	24.9	55.858	0	21.523	128340000	17	9	9	9	1	8	5	1	6	7	7	8	5	1	6	7	7	8	5	1	6	7	7	478	478	1	34	NaN	NaN	NaN	NaN
Q7V313	Enoyl-[acyl-carrier-protein] reductase [NADH]	Central Metabolism	0.146199	0.29814	26.8583	28.0587	-1.20036	0.320987	18	18	18	49.9	49.9	49.9	44.878	0	123.25	1202700000	102	18	18	18	1	15	17	8	17	17	18	15	17	8	17	17	18	15	17	8	17	17	18	401	401	1	119	NaN	NaN	NaN	NaN
Q7V314	Imidazoleglycerol-phosphate dehydratase	Central Metabolism	0.128619	0.0351478	26.4999	24.5523	1.94759	0.282914	3	3	3	35	35	35	22.486	0.0040053	3.1459	16145000	3	3	3	3	1	1	1	1	0	0	2	1	1	1	0	0	2	1	1	1	0	0	2	197	197	1	5	NaN	NaN	NaN	NaN
Q7V315	Dioxygenase	Central Metabolism	0.00352236	0.00184061	22.0849	21.6745	0.410433	0.841085	19	19	19	74.2	74.2	74.2	27.715	0	150.94	9788200000	147	19	19	19	1	16	19	11	19	19	19	16	19	11	19	19	19	16	19	11	19	19	19	260	260	1	178	NaN	NaN	NaN	NaN
Q7V316	dITP/XTP pyrophosphatase	Central Metabolism	0.0348311	0.0380233	22.4576	23.4061	-0.94852	0.827944	6	6	6	30.8	30.8	30.8	22.432	0	48.966	849740000	44	6	6	6	1	6	4	6	4	4	5	6	4	6	4	4	5	6	4	6	4	4	5	201	201	1	52	NaN	NaN	NaN	NaN
Q7V317	Phosphotransferase superclass	Central Metabolism	0.0287148	0.0498827	25.6697	26.3803	-0.71058	0.256893	3	3	3	6.7	6.7	6.7	56.711	0	5.4845	51431000	7	3	3	3	1	3	1	3	1	2	2	3	1	3	1	2	2	3	1	3	1	2	2	507	507	1	15	NaN	NaN	NaN	NaN
Q7V319	Uncharacterized protein	Uncharacterized	0.00466207	0.00348467	22.3097	21.7009	0.608718	0.329364	3	3	3	24.6	24.6	24.6	21.479	0	7.7372	141650000	8	3	3	3	1	2	1	1	1	2	3	2	1	1	1	2	3	2	1	1	1	2	3	191	191	1	10	NaN	NaN	NaN	NaN
Q7V320	Orotate phosphoribosyltransferase	Central Metabolism	0.0388285	0.0535069	24.465	25.0031	-0.538053	0.677811	36	36	36	61.5	61.5	61.5	55.446	0	129.76	3482200000	174	36	36	36	1	24	34	20	33	33	33	24	34	20	33	33	33	24	34	20	33	33	33	486	486	1	218	NaN	NaN	NaN	NaN
Q7V322	Probable oxidoreductase	Central Metabolism	0.00702862	0.00567021	22.2107	22.6733	-0.462647	0.842653	6	6	6	23	23	23	32.358	0	9.555	35189000	11	6	6	6	1	1	2	0	3	4	3	1	2	0	3	4	3	1	2	0	3	4	3	282	282	1	13	NaN	NaN	NaN	NaN
Q7V327	Probable esterase	Central Metabolism	0.0114994	0.0139541	23.2627	23.2969	-0.0341994	0.830806	12	12	12	55.9	55.9	55.9	20.215	0	91.52	767790000	60	12	12	12	1	9	11	4	9	11	11	9	11	4	9	11	11	9	11	4	9	11	11	186	186	1	75	NaN	NaN	NaN	NaN
Q7V330	Ammonium transporter	Membrane Transport	0.0818926	0.109153	27.2971	27.4976	-0.200533	0.471668	7	7	7	22.8	22.8	22.8	36.948	0	20.667	110040000	14	7	7	7	1	5	3	1	4	4	5	5	3	1	4	4	5	5	3	1	4	4	5	334	334	1	23	NaN	NaN	NaN	NaN
Q7V331	Sugar fermentation stimulation protein homolog	Basic Cellular Processes	0.0153598	0.0230333	23.9366	24.2954	-0.358754	0.323259	3	3	3	20.5	20.5	20.5	22.85	0	19.981	104060000	17	3	3	3	1	3	3	2	3	3	3	3	3	2	3	3	3	3	3	2	3	3	3	205	205	1	22	NaN	NaN	NaN	NaN
Q7V335	Serine hydroxymethyltransferase	Central Metabolism	0.0459179	0.0858571	25.9397	26.9635	-1.02385	0.329516	2	2	2	7.6	7.6	7.6	50.8	0	25.737	1598400000	43	2	2	2	1	2	2	2	2	2	2	2	2	2	2	2	2	2	2	2	2	2	2	486	486	1	33	NaN	NaN	NaN	NaN
Q7V336	3-isopropylmalate dehydratase large subunit	Central Metabolism	0.00103159	0.00241436	20.7241	21.8663	0	1	16	16	16	51.2	51.2	51.2	28.363	0	58.213	552520000	69	16	16	16	1	12	13	9	16	14	14	12	13	9	16	14	14	12	13	9	16	14	14	248	248	1	93	NaN	NaN	NaN	NaN
Q7V338	Uncharacterized protein	Uncharacterized	0.0142121	0.0115707	25.279	24.741	0.537981	0.377511	26	26	26	67.1	67.1	67.1	46.407	0	178.76	5032300000	185	26	26	26	1	22	25	18	24	25	25	22	25	18	24	25	25	22	25	18	24	25	25	423	423	1	192	NaN	NaN	NaN	NaN
Q7V342	Peptidyl-tRNA hydrolase	Basic Cellular Processes	0.00383124	0.00489057	21.5319	21.728	0	1	2	2	2	5.1	5.1	5.1	51.474	0.004	3.1235	42440000	4	2	2	2	1	2	2	0	1	1	2	2	2	0	1	1	2	2	2	0	1	1	2	469	469	1	8	NaN	NaN	NaN	NaN
Q7V347	Possible Thy1 protein homolog	Membrane Transport	0.206082	0.159581	27.4763	26.8616	0.614702	0.28125	27	27	27	41.2	41.2	41.2	77.654	0	103.58	1302500000	114	27	27	27	1	24	22	27	23	22	23	24	22	27	23	22	23	24	22	27	23	22	23	678	678	1	149	NaN	NaN	NaN	NaN
Q7V349	Phosphoglucosamine mutase	Central Metabolism	0.00110581	0.00130495	20.852	20.9507	0	1	2	2	2	7.4	7.4	7.4	23.634	0	6.2423	15060000	4	2	2	2	1	2	1	2	0	1	0	2	1	2	0	1	0	2	1	2	0	1	0	203	203	1	6	NaN	NaN	NaN	NaN
Q7V352	Isoleucine--tRNA ligase	Basic Cellular Processes	0.00585981	0.0102194	24.1071	25.0739	-0.966786	0.404669	21	21	21	72.6	72.6	72.6	24.801	0	206.77	6271900000	205	21	21	21	1	19	20	19	19	19	20	19	20	19	19	19	20	19	20	19	19	19	20	212	212	1	218	NaN	NaN	NaN	NaN
Q7V355	Aspartate carbamoyltransferase	Central Metabolism	0.0104542	0.0184374	23.5792	24.4219	-0.842758	0.324282	1	1	1	2	2	2	50.344	0.0013661	3.5154	10387000	1	1	1	1	1	1	1	0	0	0	1	1	1	0	0	0	1	1	1	0	0	0	1	452	452	1	3	NaN	NaN	NaN	NaN
Q7V357	Uncharacterized protein	Uncharacterized	0.0154883	0.0091761	21.3006	20.7896	0	1	40	40	40	38.4	38.4	38.4	111.41	0	222.13	1905200000	172	40	40	40	1	24	35	9	34	39	34	24	35	9	34	39	34	24	35	9	34	39	34	965	965	1	215	NaN	NaN	NaN	NaN
Q7V359	Coenzyme A biosynthesis bifunctional protein CoaBC	Central Metabolism	0.00120127	0.0013079	20.6527	20.9114	0	1	17	17	17	51.8	51.8	51.8	37.167	0	86.854	714490000	85	17	17	17	1	12	15	5	13	13	16	12	15	5	13	13	16	12	15	5	13	13	16	338	338	1	99	NaN	NaN	NaN	NaN
Q7V360	Photosystem II manganese-stabilizing protein	Photosynthesis	0.00300924	0.00205944	21.4502	20.8806	0	1	2	2	2	25	25	25	6.928	0	6.3816	17340000	2	2	2	2	1	1	2	1	0	1	1	1	2	1	0	1	1	1	2	1	0	1	1	60	60	1	6	NaN	NaN	NaN	NaN
Q7V361	ATP-sulfurylase	Inorganic Nutrient Processing	0.0163673	0.0422591	24.1434	25.8221	-1.6787	0.25125	2	2	2	4.5	4.5	4.5	46.885	0.0076923	2.5395	19061000	2	2	2	2	1	1	1	0	2	2	2	1	1	0	2	2	2	1	1	0	2	2	2	418	418	1	8	NaN	NaN	NaN	NaN
Q7V364	Chorismate synthase	Central Metabolism	0.00346891	0.00223503	21.7684	21.2078	0.560553	0.790261	2	2	2	20.1	20.1	20.1	28.113	0.0013774	3.6803	17135000	2	2	2	2	1	0	1	1	0	0	0	0	1	1	0	0	0	0	1	1	0	0	0	264	264	1	2	NaN	NaN	NaN	NaN
Q7V370	Delta-aminolevulinic acid dehydratase	Central Metabolism	0.0506604	0.0563949	26.1032	26.0108	0.0923932	0.605099	26	26	26	56	56	56	44.709	0	167.25	2051800000	115	26	26	26	1	15	22	9	25	25	24	15	22	9	25	25	24	15	22	9	25	25	24	391	391	1	147	NaN	NaN	NaN	NaN
Q7V373	Uncharacterized protein	Uncharacterized	0.00804208	0.00636948	21.5111	20.8747	0	1	10	10	10	26.1	26.1	26.1	39.342	0	25.183	61107000	14	10	10	10	1	9	3	3	1	4	3	9	3	3	1	4	3	9	3	3	1	4	3	364	364	1	25	NaN	NaN	NaN	NaN
Q7V374	FAD-dependent pyridine nucleotide-disulphide oxidoreductase	Central Metabolism	0.225746	0.170863	28.1784	27.5454	0.63301	0.288063	18	18	18	58.6	58.6	58.6	37.555	0	90.282	2529900000	139	18	18	18	1	14	16	14	15	17	17	14	16	14	15	17	17	14	16	14	15	17	17	333	333	1	151	NaN	NaN	NaN	NaN
Q7V377	Enolase	Central Metabolism	0.55595	0.560526	29.9235	29.6844	0.239076	0.528166	2	2	2	22.6	22.6	22.6	10.424	0.0014006	3.9997	12560000	2	2	2	2	1	2	1	1	1	1	0	2	1	1	1	1	0	2	1	1	1	1	0	93	93	1	6	NaN	NaN	NaN	NaN
Q7V378	Putative ATP-dependent Clp protease, Hsp 100, ATP-binding subunit ClpB	Basic Cellular Processes	0.000909023	0.00107586	21.5562	21.7004	0	1	27	27	27	64.8	64.8	64.8	34.398	0	323.31	10097000000	272	27	27	27	1	27	25	26	26	27	26	27	25	26	26	27	26	27	25	26	26	27	26	318	318	1	309	NaN	NaN	NaN	NaN
Q7V380	Transcription termination/antitermination protein NusG	Basic Cellular Processes	0.0197334	0.0040317	23.4669	21.4148	2.05208	0.320907	27	27	27	71.6	71.6	71.6	45.898	0	323.31	45547000000	456	27	27	27	1	24	26	25	26	27	27	24	26	25	26	27	27	24	26	25	26	27	27	430	430	1	387	NaN	NaN	NaN	NaN
Q7V381	50S ribosomal protein L11	Basic Cellular Processes	0.0346199	0.0229403	24.1959	23.4566	0.739211	0.421186	4	4	4	4.2	4.2	4.2	104.64	0.0076142	2.339	35422000	4	4	4	4	1	2	2	2	2	2	1	2	2	2	2	2	1	2	2	2	2	2	1	919	919	1	11	NaN	NaN	NaN	NaN
Q7V382	50S ribosomal protein L1	Basic Cellular Processes	0.0217041	0.0297595	24.2031	24.5703	-0.367188	0.563192	6	6	6	37.9	37.9	37.9	22.774	0	40.496	87959000	14	6	6	6	1	5	1	5	0	0	1	5	1	5	0	0	1	5	1	5	0	0	1	203	203	1	13	NaN	NaN	NaN	NaN
Q7V383	50S ribosomal protein L10	Basic Cellular Processes	0.013241	0.0173973	23.2147	23.3674	-0.152707	0.678641	6	6	6	45.4	45.4	45.4	14.773	0	12.644	238500000	26	6	6	6	1	4	5	5	4	6	6	4	5	5	4	6	6	4	5	5	4	6	6	141	141	1	35	NaN	NaN	NaN	NaN
Q7V384	50S ribosomal protein L7/L12	Basic Cellular Processes	0.0789974	0.0304899	25.2969	23.7618	1.53512	0.306381	14	14	14	61.3	61.3	61.3	25.591	0	94.553	515980000	56	14	14	14	1	12	10	6	12	12	14	12	10	6	12	12	14	12	10	6	12	12	14	235	235	1	79	NaN	NaN	NaN	NaN
Q7V389	Uncharacterized protein	Uncharacterized	0.00232627	0.00375138	21.1823	21.629	0	1	5	5	5	28	28	28	19.068	0	16.722	133240000	20	5	5	5	1	4	3	3	3	4	5	4	3	3	3	4	5	4	3	3	3	4	5	175	175	1	30	NaN	NaN	NaN	NaN
Q7V390	Phosphoglycerate kinase	Central Metabolism	0.419797	0.859117	29.171	30.2082	-1.03715	0.254298	7	7	7	42.7	42.7	42.7	13.244	0	20.72	329760000	15	7	7	7	1	5	6	6	3	5	4	5	6	6	3	5	4	5	6	6	3	5	4	131	131	1	29	NaN	NaN	NaN	NaN
Q7V391	Ribosome biogenesis GTPase A	Basic Cellular Processes	0.00259345	0.00185669	21.4285	20.8688	0	1	2	2	2	8.2	8.2	8.2	28.092	0.0077121	2.5866	27534000	10	2	2	2	1	1	1	1	1	1	2	1	1	1	1	1	2	1	1	1	1	1	2	243	243	1	7	NaN	NaN	NaN	NaN
Q7V393	ABC transporter, ATP binding component, possibly for oligopeptides	Membrane Transport	0.0286241	0.0135188	23.5863	22.7019	0.884375	0.842093	34	34	34	76.4	76.4	76.4	42.964	0	323.31	53874000000	480	34	34	34	1	28	31	25	32	34	33	28	31	25	32	34	33	28	31	25	32	34	33	402	402	1	440	NaN	NaN	NaN	NaN
Q7V395	tRNA modification GTPase MnmE	Basic Cellular Processes	0.00523037	0.00431683	22.9982	22.7274	0.270831	0.805293	1	1	1	2.4	2.4	2.4	32.976	0.0064935	2.7015	1624700	1	1	1	1	1	1	0	0	0	0	0	1	0	0	0	0	0	1	0	0	0	0	0	288	288	1	1	NaN	NaN	NaN	NaN
Q7V396	Arginine--tRNA ligase	Basic Cellular Processes	0.00395078	0.00603439	22.9795	23.6272	-0.647682	0.46468	3	3	3	5.8	5.8	5.8	60.195	0.0077022	2.5756	455310000	8	3	3	3	1	2	2	3	1	1	2	2	2	3	1	1	2	2	2	3	1	1	2	531	531	1	11	NaN	NaN	NaN	NaN
Q7V397	Aminotransferase	Central Metabolism	0.0178923	0.0263338	24.3562	24.7953	-0.439105	0.793085	9	9	9	22	22	22	51.474	0	27.253	130950000	11	NaN	NaN	NaN	2	9	5	3	4	5	6	9	5	3	4	5	6	9	5	3	4	5	6	460	NaN	1	32	NaN	NaN	NaN	NaN
Q7V398	Uncharacterized protein	Uncharacterized	0.0562683	0.0388626	25.777	25.0125	0.76452	0.259252	27	27	27	39.6	39.6	39.6	69.643	0	102.51	714390000	105	27	27	27	1	18	20	8	23	25	25	18	20	8	23	25	25	18	20	8	23	25	25	603	603	1	140	NaN	NaN	NaN	NaN
Q7V399	Para-aminobenzoate synthase component II	Central Metabolism	0.0150364	0.0465513	23.0571	24.9732	-1.91612	0.289714	13	13	13	39	39	39	42.387	0	56.053	442960000	44	13	13	13	1	8	9	2	6	11	13	8	9	2	6	11	13	8	9	2	6	11	13	369	369	1	65	NaN	NaN	NaN	NaN
Q7V3A4	Glutaredoxin	Oxidative Stress	0.00714105	0.010648	21.1434	21.5487	0	1	12	12	12	55.4	55.4	55.4	27.108	0	57.147	1312200000	78	12	12	12	1	12	10	12	11	11	11	12	10	12	11	11	11	12	10	12	11	11	11	242	242	1	90	NaN	NaN	NaN	NaN
Q7V3A7	Putative O-succinylbenzoate synthase	Central Metabolism	0.00790358	0.00502839	23.371	22.3031	1.06791	0.282139	8	8	8	54	54	54	22.097	0	45.34	683410000	38	8	8	8	1	5	7	2	7	7	7	5	7	2	7	7	7	5	7	2	7	7	7	198	198	1	56	NaN	NaN	NaN	NaN
Q7V3B0	NAD(P)H-quinone oxidoreductase subunit	Photosynthesis	0.00191915	0.000969731	21.2433	20.368	0	1	1	1	1	19	19	19	9.8713	0.0013986	3.9681	0	1	1	1	1	1	1	0	0	0	0	0	1	0	0	0	0	0	1	0	0	0	0	0	84	84	1	1	NaN	NaN	NaN	NaN
Q7V3B2	NifS-like aminotransferase class-V	Central Metabolism	0.0132065	0.0226649	24.2429	24.8945	-0.65155	0.27593	6	6	6	20.2	20.2	20.2	37.426	0	11.527	53930000	14	6	6	6	1	5	3	5	2	2	2	5	3	5	2	2	2	5	3	5	2	2	2	321	321	1	20	NaN	NaN	NaN	NaN
Q7V3B3	Two-component response regulator	Other	0.17541	0.0370266	27.0898	24.9083	2.18141	0.251087	1	1	1	3.8	3.8	3.8	45.242	0.0076239	2.3586	7954200	2	1	1	1	1	1	1	0	0	1	1	1	1	0	0	1	1	1	1	0	0	1	1	395	395	1	4	NaN	NaN	NaN	NaN
Q7V3B4	Mg-protoporphyrin IX methyltransferase	Photosynthesis	0.00341963	0.00207297	21.3339	20.7238	0.610092	0.525562	17	17	17	49	49	49	42.186	0	90.382	555670000	64	17	17	17	1	10	13	6	10	11	10	10	13	6	10	11	10	10	13	6	10	11	10	382	382	1	74	NaN	NaN	NaN	NaN
Q7V3B5	N5-carboxyaminoimidazole ribonucleotide mutase	Central Metabolism	0.149161	0.0716505	26.5436	25.1927	1.35088	0.282215	20	20	20	69.8	69.8	69.8	27.426	0	149.28	2278700000	118	20	20	20	1	20	16	20	13	16	17	20	16	20	13	16	17	20	16	20	13	16	17	242	242	1	161	NaN	NaN	NaN	NaN
Q7V3C0	Citrate synthase	Central Metabolism	0.0976672	0.0707188	27.1894	26.5124	0.676986	0.351427	3	3	3	12	12	12	26.601	0	6.0321	17847000	4	3	3	3	1	3	1	0	1	2	2	3	1	0	1	2	2	3	1	0	1	2	2	233	233	1	9	NaN	NaN	NaN	NaN
Q7V3C2	NAD kinase 1	Central Metabolism	0.010666	0.0233815	22.9531	24.5872	-1.63411	0.328957	5	5	5	20.2	20.2	20.2	17.385	0	28.234	696170000	43	5	5	5	1	5	5	5	4	5	4	5	5	5	4	5	4	5	5	5	4	5	4	163	163	1	58	NaN	NaN	NaN	NaN
Q7V3C4	Bacterial regulatory protein, LuxR family	Basic Cellular Processes	0.00992133	0.00701025	21.8234	21.0325	0	1	24	24	24	55.1	55.1	55.1	42.875	0	113.25	4138800000	154	24	24	24	1	23	20	21	20	20	19	23	20	21	20	20	19	23	20	21	20	20	19	381	381	1	171	NaN	NaN	NaN	NaN
Q7V3C5	Methylenetetrahydrofolate reductase	Central Metabolism	0.023159	0.0472879	24.2444	25.5897	-1.34522	0.346604	6	6	6	23.1	23.1	23.1	34.128	0	28.095	168900000	18	6	6	6	1	4	4	1	5	6	6	4	4	1	5	6	6	4	4	1	5	6	6	299	299	1	26	NaN	NaN	NaN	NaN
Q7V3D2	Phytoene desaturase	Central Metabolism	0.00353925	0.00220115	22.7657	21.7858	0.979886	0.349529	1	1	1	13	13	13	10.291	0.0013587	3.4264	7690700	2	1	1	1	1	1	0	1	0	0	0	1	0	1	0	0	0	1	0	1	0	0	0	92	92	1	2	NaN	NaN	NaN	NaN
Q7V3D3	Squalene and phytoene synthases	Central Metabolism	0.00219334	0.00233302	21.3981	21.2511	0	1	12	12	12	51.4	51.4	51.4	32.708	0	97.464	1132600000	70	12	12	12	1	9	11	5	12	12	10	9	11	5	12	12	10	9	11	5	12	12	10	296	296	1	82	NaN	NaN	NaN	NaN
Q7V3D4	RNA-binding region RNP-1 (RNA recognition motif)	Basic Cellular Processes	0.00666598	0.00526953	21.7489	21.2944	0	1	3	3	3	7	7	7	53.353	0	8.1637	17888000	5	3	3	3	1	3	0	3	1	1	0	3	0	3	1	1	0	3	0	3	1	1	0	473	473	1	8	NaN	NaN	NaN	NaN
Q7V3D5	Poly A polymerase family	Basic Cellular Processes	0.00117866	0.00144137	20.8157	21.0069	0	1	1	1	1	4	4	4	35.563	0.0039894	3.0017	0	4	1	1	1	1	0	1	0	1	1	1	0	1	0	1	1	1	0	1	0	1	1	1	302	302	1	4	NaN	NaN	NaN	NaN
Q7V3D7	Uncharacterized protein	Uncharacterized	0.00509308	0.00365118	22.139	21.3491	0	1	2	2	2	20.1	20.1	20.1	15.726	0	9.6792	14580000	4	2	2	2	1	2	1	1	1	0	1	2	1	1	1	0	1	2	1	1	1	0	1	139	139	1	6	NaN	NaN	NaN	NaN
Q7V3D9	Malonyl CoA-acyl carrier protein transacylase	Central Metabolism	0.019497	0.0419768	23.8993	25.3958	-1.49648	0.33054	1	1	1	1.9	1.9	1.9	48.892	0.0076726	2.4443	0	1	1	1	1	1	0	1	0	0	0	0	0	1	0	0	0	0	0	1	0	0	0	0	415	415	1	1	NaN	NaN	NaN	NaN
Q7V3E0	3-oxoacyl-[acyl-carrier-protein] synthase 3	Central Metabolism	0.0229099	0.0365319	24.611	25.3786	-0.767626	0.415399	2	2	2	8.3	8.3	8.3	24.958	0.001385	3.7013	14565000	4	2	2	2	1	1	0	0	1	1	2	1	0	0	1	1	2	1	0	0	1	1	2	216	216	1	5	NaN	NaN	NaN	NaN
Q7V3E2	Two-component response regulator	Other	0.0923168	0.0425363	26.3379	25.0712	1.26674	0.316455	12	12	12	51.7	51.7	51.7	33.292	0	65.975	1030400000	45	12	12	12	1	10	12	4	12	12	10	10	12	4	12	12	10	10	12	4	12	12	10	298	298	1	89	NaN	NaN	NaN	NaN
Q7V3E6	Thymidylate kinase	Energy Production and Conversion	0.00588842	0.00903358	22.0575	22.719	-0.661512	0.466481	12	12	12	44.8	44.8	44.8	36.465	0	71.287	800130000	63	12	12	12	1	10	10	4	11	11	11	10	10	4	11	11	11	10	10	4	11	11	11	335	335	1	87	NaN	NaN	NaN	NaN
Q7V3E8	Two-component response regulator	Other	0.0187219	0.00374334	23.5056	21.6425	1.86314	0.331985	20	20	20	78.2	78.2	78.2	27.909	0	128.05	1723800000	95	20	20	20	1	20	16	14	10	16	15	20	16	14	10	16	15	20	16	14	10	16	15	248	248	1	133	NaN	NaN	NaN	NaN
Q7V3E9	Possible Herpesvirus UL6 like	Other	0.0548168	0.0383451	26.1112	25.3627	0.748484	0.284	5	5	5	25.2	25.2	25.2	24.223	0	17.891	73106000	17	5	5	5	1	4	4	0	3	4	2	4	4	0	3	4	2	4	4	0	3	4	2	214	214	1	17	NaN	NaN	NaN	NaN
Q7V3F2	Cysteine synthase	Central Metabolism	0.0912596	0.0702719	26.8806	26.2807	0.599874	0.328331	7	7	7	37.1	37.1	37.1	28.628	0	64.005	169280000	18	7	7	7	1	7	4	5	0	4	5	7	4	5	0	4	5	7	4	5	0	4	5	251	251	1	27	NaN	NaN	NaN	NaN
Q7V3F8	Uncharacterized protein	Uncharacterized	0.0302035	0.0112739	24.0638	22.2029	1.86084	0.253402	30	30	30	71.6	71.6	71.6	36.881	0	108.75	2514700000	187	30	30	30	1	30	29	28	27	28	28	30	29	28	27	28	28	30	29	28	27	28	28	313	313	1	223	NaN	NaN	NaN	NaN
Q7V3G0	Zeta-carotene desaturase	Central Metabolism	0.00109004	0.00190346	21.0372	21.2551	0	1	23	23	23	76.7	76.7	76.7	34.719	0	175.5	4279300000	172	23	23	23	1	20	17	19	19	20	20	20	17	19	19	20	20	20	17	19	19	20	20	322	322	1	209	NaN	NaN	NaN	NaN
Q7V3G1	Uncharacterized protein	Uncharacterized	0.0455696	0.00853935	24.449	22.1862	2.26274	0.255179	5	5	5	35.9	35.9	35.9	16.412	0	26.973	116860000	12	5	5	5	1	4	3	5	0	2	3	4	3	5	0	2	3	4	3	5	0	2	3	142	142	1	18	NaN	NaN	NaN	NaN
Q7V3G2	Putative uroporphyrinogen III synthase	Central Metabolism	0.00438953	0.0105741	21.7851	23.2862	-1.50103	0.257228	1	1	1	2.5	2.5	2.5	54.208	0	4.5438	9127500	2	1	1	1	1	1	0	1	0	0	0	1	0	1	0	0	0	1	0	1	0	0	0	484	484	1	2	NaN	NaN	NaN	NaN
Q7V3G3	Ribosome-binding factor A	Basic Cellular Processes	0.00341106	0.00528293	20.7769	21.2616	0	1	4	4	4	22.4	22.4	22.4	18.093	0	19.361	115970000	14	4	4	4	1	4	2	4	2	2	3	4	2	4	2	2	3	4	2	4	2	2	3	156	156	1	17	NaN	NaN	NaN	NaN
Q7V3G5	Putative glutathione S-transferase	Basic Cellular Processes	0.0053545	0.00344888	22.3853	21.484	0.901293	0.297455	5	5	5	19	19	19	30.108	0	9.8896	88884000	11	5	5	5	1	1	4	0	3	5	3	1	4	0	3	5	3	1	4	0	3	5	3	269	269	1	16	NaN	NaN	NaN	NaN
Q7V3G8	Shikimate kinase	Central Metabolism	0.00883863	0.00678239	22.7086	22.1102	0.598371	0.274314	1	1	1	9.8	9.8	9.8	15.272	0	4.0928	2800800	2	1	1	1	1	1	0	0	0	0	0	1	0	0	0	0	0	1	0	0	0	0	0	132	132	1	2	NaN	NaN	NaN	NaN
Q7V3H0	RibD/ribG C-terminal domain	Basic Cellular Processes	0.00397465	0.00659251	21.7071	22.3062	-0.599092	0.283589	2	2	2	11.6	11.6	11.6	27.229	0	7.9456	18688000	5	2	2	2	1	2	2	2	1	1	1	2	2	2	1	1	1	2	2	2	1	1	1	241	241	1	9	NaN	NaN	NaN	NaN
Q7V3H4	Uncharacterized protein	Uncharacterized	0.0526027	0.0313718	26.0193	25.0681	0.951212	0.25459	5	5	5	33.5	33.5	33.5	21.233	0	13.076	49619000	9	5	5	5	1	3	2	3	2	3	3	3	2	3	2	3	3	3	2	3	2	3	3	185	185	1	16	NaN	NaN	NaN	NaN
Q7V3H5	L-aspartate oxidase	Central Metabolism	0.00855389	0.0140356	24.1593	24.7427	-0.583384	0.351503	4	4	4	19.1	19.1	19.1	25.132	0	9.434	63845000	11	4	4	4	1	3	4	0	4	4	4	3	4	0	4	4	4	3	4	0	4	4	4	220	220	1	23	NaN	NaN	NaN	NaN
Q7V3H8	Possible RND family outer membrane efflux protein	Membrane Transport	0.0350422	0.0264286	26.0464	25.4218	0.624635	0.387656	4	4	4	17.7	17.7	17.7	34.764	0	47.613	403350000	23	4	4	4	1	4	4	4	3	4	4	4	4	4	3	4	4	4	4	4	3	4	4	311	311	1	26	NaN	NaN	NaN	NaN
Q7V3H9	Inositol-1-monophosphatase	Central Metabolism	0.063352	0.124802	25.5956	26.8233	-1.22766	0.330153	7	7	7	16.9	16.9	16.9	62.02	0	25.966	303760000	20	7	7	7	1	2	6	2	6	7	6	2	6	2	6	7	6	2	6	2	6	7	6	555	555	1	33	NaN	NaN	NaN	NaN
Q7V3I3	Uncharacterized protein	Uncharacterized	0.0390029	0.00555246	23.2464	20.9756	2.27074	0.352656	32	32	32	50.2	50.2	50.2	54.266	0	314.27	2805800000	188	32	32	32	1	26	27	28	30	27	28	26	27	28	30	27	28	26	27	28	30	27	28	476	476	1	219	NaN	NaN	NaN	NaN
Q7V3I5	Possible serine protease	Central Metabolism	0.015726	0.00836541	24.5785	23.4442	1.13423	0.3488	17	17	17	66.8	66.8	66.8	29.223	0	104.19	1705100000	91	17	17	17	1	12	16	6	13	15	13	12	16	6	13	15	13	12	16	6	13	15	13	265	265	1	114	NaN	NaN	NaN	NaN
Q7V3J0	Putative potassium channel, VIC family	Membrane Transport	0.00547883	0.00284188	21.9364	21.1105	0.825869	0.51289	2	2	2	40.8	40.8	40.8	11.735	0	4.4167	49761000	6	2	2	2	1	2	1	2	0	0	1	2	1	2	0	0	1	2	1	2	0	0	1	103	103	1	6	NaN	NaN	NaN	NaN
Q7V3J5	Pantothenate kinase	Central Metabolism	0.00790205	0.014362	22.3076	23.4783	-1.17066	0.40069	10	10	10	29.6	29.6	29.6	41.838	0	26.861	310100000	32	10	10	10	1	8	8	9	8	7	8	8	8	9	8	7	8	8	8	9	8	7	8	382	382	1	54	NaN	NaN	NaN	NaN
Q7V3J6	Putative bacterioferritin comigratory (BCP) protein	Membrane Transport	0.124395	0.163589	26.2745	26.4405	-0.166053	0.308582	5	5	5	34.6	34.6	34.6	25.963	0	28.814	41116000	8	5	5	5	1	5	1	2	0	2	1	5	1	2	0	2	1	5	1	2	0	2	1	234	234	1	13	NaN	NaN	NaN	NaN
Q7V3J9	Phosphoglucomutase	Central Metabolism	0.0490437	0.0896919	26.6214	27.3928	-0.771306	0.280981	5	5	5	30.1	30.1	30.1	25.243	0	12.868	132710000	14	5	5	5	1	3	4	1	3	3	5	3	4	1	3	3	5	3	4	1	3	3	5	226	226	1	22	NaN	NaN	NaN	NaN
Q7V3K0	Uncharacterized protein	Uncharacterized	0.0430555	0.0222553	25.9376	24.7921	1.14552	0.254793	20	20	20	86.5	86.5	86.5	17.798	0	135.16	3794400000	145	20	20	20	1	15	18	16	19	19	20	15	18	16	19	19	20	15	18	16	19	19	20	155	155	1	174	NaN	NaN	NaN	NaN
Q7V3K3	ABC transporter, ATP binding component	Membrane Transport	0.0037158	0.00356861	21.6745	21.5966	0	1	22	22	22	52.8	52.8	52.8	59.718	0	232.7	7408400000	186	22	22	22	1	17	22	16	22	20	19	17	22	16	22	20	19	17	22	16	22	20	19	545	545	1	197	NaN	NaN	NaN	NaN
Q7V3K4	ABC transporter, membrane component	Membrane Transport	0.00150492	0.00120549	21.1303	20.7189	0	1	13	13	13	40.5	40.5	40.5	41.428	0	98.085	684070000	61	13	13	13	1	12	8	12	8	11	9	12	8	12	8	11	9	12	8	12	8	11	9	368	368	1	73	NaN	NaN	NaN	NaN
Q7V3K7	Peptide deformylase	Central Metabolism	0.0179056	0.00594156	23.2909	22.0388	1.25208	0.400377	2	2	2	11.5	11.5	11.5	29.234	0	6.9674	19381000	3	2	2	2	1	2	1	0	0	0	0	2	1	0	0	0	0	2	1	0	0	0	0	261	261	1	3	NaN	NaN	NaN	NaN
Q7V3L2	Uncharacterized protein	Uncharacterized	0.00213449	0.00202161	21.415	21.0656	0	1	3	3	3	7.7	7.7	7.7	45.919	0.0065445	2.7473	14587000	6	3	3	3	1	3	2	0	1	2	1	3	2	0	1	2	1	3	2	0	1	2	1	405	405	1	9	NaN	NaN	NaN	NaN
Q7V3L5	Acetyl-CoA carboxylase, biotin carboxylase subunit	Central Metabolism	0.0110534	0.0123792	23.5223	24.2332	-0.710925	0.707224	8	8	8	35.3	35.3	35.3	22.525	0	22.883	125140000	16	8	8	8	1	8	4	3	0	3	3	8	4	3	0	3	3	8	4	3	0	3	3	201	201	1	25	NaN	NaN	NaN	NaN
Q7V3L7	Uncharacterized protein	Uncharacterized	0.00160206	0.00173453	20.8448	20.9802	0	1	1	1	1	6.8	6.8	6.8	35.413	0	5.9709	3246900	1	1	1	1	1	1	0	0	0	0	0	1	0	0	0	0	0	1	0	0	0	0	0	310	310	1	1	NaN	NaN	NaN	NaN
Q7V3M4	Uncharacterized protein	Uncharacterized	0.00291476	0.00361901	21.1661	21.4687	0	1	17	17	17	49	49	49	49.248	0	90.42	854980000	67	17	17	17	1	13	15	3	13	15	15	13	15	3	13	15	15	13	15	3	13	15	15	449	449	1	103	NaN	NaN	NaN	NaN
Q7V3M5	Arginine biosynthesis bifunctional protein ArgJ	Central Metabolism	0.00871931	0.0153937	22.4797	24.4085	-1.92882	0.445995	1	1	1	4.1	4.1	4.1	37.896	0.0088608	2.3072	5902300	2	1	1	1	1	1	0	1	0	0	0	1	0	1	0	0	0	1	0	1	0	0	0	338	338	1	2	NaN	NaN	NaN	NaN
Q7V3M7	Aspartyl/glutamyl-tRNA(Asn/Gln) amidotransferase subunit B	Central Metabolism	0.0115009	0.0187864	23.9744	24.9815	-1.00706	0.451755	4	4	4	29.6	29.6	29.6	23.914	0	23.514	40665000	5	4	4	4	1	4	1	1	1	1	1	4	1	1	1	1	1	4	1	1	1	1	1	223	223	1	9	NaN	NaN	NaN	NaN
Q7V3M8	Nucleoside diphosphate kinase	Central Metabolism	0.610978	0.713092	28.5465	28.5424	0.00401624	0.987635	5	5	5	18.9	18.9	18.9	43.402	0	25.05	182480000	14	5	5	5	1	3	4	0	4	4	3	3	4	0	4	4	3	3	4	0	4	4	3	402	402	1	21	NaN	NaN	NaN	NaN
Q7V3M9	Biosynthetic arginine decarboxylase	Central Metabolism	0.00559561	0.0106696	23.3291	24.5582	-1.22911	0.370925	28	28	28	59.4	59.4	59.4	55.202	0	179.84	1820100000	144	28	28	28	1	26	26	8	26	28	28	26	26	8	26	28	28	26	26	8	26	28	28	490	490	1	194	NaN	NaN	NaN	NaN
Q7V3N0	Alanine--tRNA ligase	Central Metabolism	0.00325516	0.00489935	23.2308	23.88	-0.649203	0.478991	10	10	10	49.3	49.3	49.3	17.186	0	106.52	9570400000	121	10	10	10	1	8	8	8	8	10	9	8	8	8	8	10	9	8	8	8	8	10	9	152	152	1	115	NaN	NaN	NaN	NaN
Q7V3N1	Flavoprotein	Energy Production and Conversion	0.00380717	0.00285947	23.09	22.4934	0.596572	0.387226	22	22	22	35.5	35.5	35.5	73.424	0	110.61	1020000000	110	22	22	22	1	13	19	6	18	22	21	13	19	6	18	22	21	13	19	6	18	22	21	648	648	1	123	NaN	NaN	NaN	NaN
Q7V3N2	Flavoprotein	Energy Production and Conversion	0.0125088	0.00733949	24.6819	23.7698	0.912105	0.424924	19	19	19	21	21	21	99.138	0	49.041	347630000	52	19	19	19	1	10	13	1	13	17	16	10	13	1	13	17	16	10	13	1	13	17	16	886	886	1	74	NaN	NaN	NaN	NaN
Q7V3N3	Possible reductase	Central Metabolism	0.0285823	0.0562969	24.0309	25.0696	-1.0387	0.285184	8	8	8	19	19	19	66.102	0	62.567	122500000	22	8	8	8	1	8	6	6	3	6	7	8	6	6	3	6	7	8	6	6	3	6	7	591	591	1	37	NaN	NaN	NaN	NaN
Q7V3N6	Uncharacterized protein	Uncharacterized	0.00818529	0.00694207	22.9807	22.4886	0.492126	0.329317	5	5	5	10.8	10.8	10.8	67.219	0	9.2502	241130000	10	5	5	5	1	4	4	3	3	4	4	4	4	3	3	4	4	4	4	3	3	4	4	600	600	1	31	NaN	NaN	NaN	NaN
Q7V3N7	GMP synthase [glutamine-hydrolyzing]	Central Metabolism	0.029662	0.0455411	25.8057	26.3664	-0.560631	0.409459	8	8	8	40.2	40.2	40.2	19.519	0	50.101	690720000	49	8	8	8	1	7	7	4	7	8	7	7	7	4	7	8	7	7	7	4	7	8	7	174	174	1	58	NaN	NaN	NaN	NaN
Q7V3N8	Cobalt-precorrin-5B C(1)-methyltransferase	Central Metabolism	0.00501609	0.00201183	22.6253	21.3506	1.2747	0.382735	3	3	3	13.1	13.1	13.1	28.455	0	5.9524	50128000	9	3	3	3	1	3	2	2	2	2	1	3	2	2	2	2	1	3	2	2	2	2	1	237	237	1	13	NaN	NaN	NaN	NaN
Q7V3N9	Soluble hydrogenase small subunit	Central Metabolism	0.474485	0.490586	29.526	29.331	0.194951	0.518477	35	35	35	65.2	65.2	65.2	59.597	0	283.53	4905300000	235	35	35	35	1	34	34	20	34	33	35	34	34	20	34	33	35	34	34	20	34	33	35	528	528	1	259	NaN	NaN	NaN	NaN
Q7V3P3	Uncharacterized protein	Uncharacterized	0.00574373	0.00735728	22.7204	22.8783	-0.157934	0.753584	3	3	3	9.4	9.4	9.4	41.281	0	9.3005	42521000	10	3	3	3	1	3	3	3	1	3	3	3	3	3	1	3	3	3	3	3	1	3	3	372	372	1	18	NaN	NaN	NaN	NaN
Q7V3P4	4-hydroxythreonine-4-phosphate dehydrogenase	Central Metabolism	0.00744598	0.0072902	23.3318	23.039	0.292775	0.586526	35	35	35	65.4	65.4	65.4	42.405	0	323.31	31197000000	486	35	35	35	1	31	34	33	35	34	35	31	34	33	35	34	35	31	34	33	35	34	35	384	384	1	431	NaN	NaN	NaN	NaN
Q7V3P5	Elongation factor P	Basic Cellular Processes	0.257606	0.132138	27.5277	26.3383	1.18941	0.279545	8	8	8	30.5	30.5	30.5	33.655	0	16.658	103790000	15	8	8	8	1	6	6	3	3	6	6	6	6	3	3	6	6	6	6	3	3	6	6	295	295	1	30	NaN	NaN	NaN	NaN
Q7V3P8	UDP-N-acetylmuramate--L-alanine ligase	Central Metabolism	0.00196598	0.000885746	21.7175	20.5241	0	1	8	8	8	32.4	32.4	32.4	38.188	0	34.462	194170000	34	8	8	8	1	6	7	5	4	7	7	6	7	5	4	7	7	6	7	5	4	7	7	346	346	1	38	NaN	NaN	NaN	NaN
Q7V3Q3	Chaperone protein DnaJ	Basic Cellular Processes	0.00243692	0.00272947	21.7025	21.7982	-0.0956847	0.901022	12	12	11	39.8	39.8	39.8	20.616	0	42.504	1720700000	69	12	12	11	1	10	9	10	9	8	10	10	9	10	9	8	10	10	9	10	9	8	10	186	186	1	74	NaN	NaN	NaN	NaN
Q7V3Q4	Protein GrpE	Basic Cellular Processes	0.227013	0.0570437	27.5621	25.5019	2.06015	0.272759	2	2	2	5.9	5.9	5.9	53.638	0	12.499	5352600	2	2	2	2	1	0	1	0	0	2	0	0	1	0	0	2	0	0	1	0	0	2	0	473	473	1	3	NaN	NaN	NaN	NaN
Q7V3Q9	Signal recognition particle receptor FtsY	Membrane Transport	0.00789849	0.00652834	23.5186	23.2945	0.224102	0.829728	2	2	2	5.9	5.9	5.9	40.201	0	5.9853	29457000	5	2	2	2	1	2	1	1	2	2	2	2	1	1	2	2	2	2	1	1	2	2	2	374	374	1	11	NaN	NaN	NaN	NaN
Q7V3R0	N utilization substance protein B homolog	Inorganic Nutrient Processing	0.00267849	0.00589348	20.8385	21.9916	0	1	17	17	17	63.2	63.2	63.2	27.671	0	174.22	3963700000	117	NaN	NaN	NaN	2	17	15	17	12	13	14	17	15	17	12	13	14	17	15	17	12	13	14	239	NaN	1	153	NaN	NaN	NaN	NaN
Q7V3R4	DNA topoisomerase (ATP-hydrolyzing)	Basic Cellular Processes	0.000826152	0.000737566	21.4419	20.9616	0	1	14	14	14	35.5	35.5	35.5	48.441	0	70.176	343650000	32	14	14	14	1	14	11	5	7	9	11	14	11	5	7	9	11	14	11	5	7	9	11	440	440	1	61	NaN	NaN	NaN	NaN
Q7V3R5	Phosphoribosylformylglycinamidine synthase subunit PurL	Central Metabolism	0.0177953	0.0350612	24.7932	26.5462	-1.75305	0.412942	2	2	2	9.6	9.6	9.6	24.04	0.0039947	3.0177	21748000	2	2	2	2	1	2	2	0	1	1	2	2	2	0	1	1	2	2	2	0	1	1	2	209	209	1	8	NaN	NaN	NaN	NaN
Q7V3R7	DNA polymerase III subunit beta	Basic Cellular Processes	0.10465	0.158403	27.0955	27.7011	-0.60551	0.443167	1	1	1	1.7	1.7	1.7	93.038	0.0013643	3.4819	1394100	1	1	1	1	1	1	0	0	0	0	0	1	0	0	0	0	0	1	0	0	0	0	0	813	813	1	1	NaN	NaN	NaN	NaN
Q8GBX9	Putative neutral invertase-like protein	Other	0.00384416	0.000938315	22.0453	20.6247	1.42054	0.418131	38	38	38	54.9	54.9	54.9	85.196	0	234.25	3761200000	198	38	38	38	1	30	34	7	38	36	36	30	34	7	38	36	36	30	34	7	38	36	36	779	779	1	238	NaN	NaN	NaN	NaN
Q93P09	Photosystem II CP43 reaction center protein	Photosynthesis	0.0011586	0.00110991	21.0623	20.7081	0	1	24	24	24	67	67	67	42.505	0	164.92	6420400000	157	24	24	24	1	20	21	14	22	24	22	20	21	14	22	24	22	20	21	14	22	24	22	385	385	1	178	NaN	NaN	NaN	NaN
Q93SN7	Phycoerythrobilin:ferredoxin oxidoreductase	Photosynthesis	0.00123927	0.00191662	20.3114	20.6378	0	1	5	5	5	15.3	15.3	15.3	55.979	0	17.661	48199000	6	5	5	5	1	5	2	1	2	2	2	5	2	1	2	2	2	5	2	1	2	2	2	478	478	1	17	NaN	NaN	NaN	NaN
Q93SN8	15,16-dihydrobiliverdin:ferredoxin oxidoreductase	Photosynthesis	0.0019357	0.00485719	20.8855	21.928	0	1	4	4	4	9.3	9.3	9.3	50.454	0	11.301	8699600	4	4	4	4	1	0	0	4	0	0	0	0	0	4	0	0	0	0	0	4	0	0	0	460	460	1	4	NaN	NaN	NaN	NaN
Q9RC08	Photosystem I P700 chlorophyll a apoprotein A1	Photosynthesis	0.00061931	0.000932241	20.9244	21.2945	0	1	2	2	2	6.6	6.6	6.6	29.872	0.0013514	3.3448	33384000	3	2	2	2	1	1	2	0	0	0	1	1	2	0	0	0	1	1	2	0	0	0	1	257	257	1	4	NaN	NaN	NaN	NaN
									1	1	1	5.9	5.9	5.9	28.34	0.0052632	2.8209	15369000	2	1	1	1	1	1	1	0	1	1	1	1	1	0	1	1	1	1	1	0	1	1	1	236	236	1	5	NaN	NaN	NaN	NaN
									2	2	2	3.3	3.3	3.3	84.254	0.0013793	3.6852	4125000	2	2	2	2	1	0	0	2	0	0	0	0	0	2	0	0	0	0	0	2	0	0	0	767	767	1	2	NaN	NaN	NaN	NaN
[truncated: 35 more columns]
